# Supplementary material for: Antheraea pernyi Suppressor of Cytokine Signaling 2 Negatively Modulates the JAK/STAT Pathway to Attenuate Microbial Infection
Source: MDPI journal article supplement (doi:10.3390/ijms231810389), 2022-09-08
Supplement: s1 [file s1]

1 GTCGAGTATAGTAGAAGGTATATGTATAACATTACGCAATCTGTTTCACCTACGGCTCGG  
61 TGCGGACGGATAACTTTTTCCATTAAACGCTGTGCACTGAATTGAACATACACTCATATGGC  
121 GCTAACCAACAAAAAATAGACCAAGTGAATGAACATTTCTAACGTTTATTAGACGTCTGAA  
181 AGCGACGGGGCCCTGCCTCCAACATTGATGATAGATAGATACCAAGAGTTACCTA  
241 ATTTAACATTGTGCGCCGGTCATCGGGGTCAACAGTCCACCGTAAAGTTAGTTAAGAGTC  
301 ACGAACCGCCATGACAGAACCGGGCCGTCGTGTTCCGCCAGCCTTGGACGGAAGAACATAA  
361 GTTTTATAAATTAGTGACAATGCCTTGAGTTATTTTCGTGGAAGCGACAAGGTTGGCCGTT  
421 CTGGGAAGTGGCGGCTCGTCCGCAAGTACGACTTGCTCGTGCTCGGCGTCCCCGCACTCC  
481 CCGCTGCCGCGCCCCGCACCCCGCACGCGTGTTTATTTTACGTCCGAACACACCGCGCGCC  
541 AGCTATACTCCACGCCGAGTCGTTTCAGTCTGAATTCGTGCACGGAAGAGAGAGCCGTCAT  
601 CGCCGCGCAGCAACGATCACGAACCTTTCACCTCCGTGATATTATCACCTGTGATAAACAC  
661 CGATGCCGGGTGAAACTGAATGTGCAGTCCGTACTTAGAAAAGCGTTTCTGTCTGCTGTGAA  
721 CGGACTGCCGACCGTCGGTTTTCTGCAAATTAATTTCTCCAGTGTAGTTGTCTGGTTTTCTTC  
781 GAAACTGCTTGTAAAGAGTTTTTACTGAGAAACGAAACGGCCGTAAAGTGGATTTGAGGAA  
841 ATATAAGTAATTATAAGTGGGCTTTTGTGTTTCCGTGCTGTCTGTTGTTAACAAAAGACGTTTA  
901 CATTGGATCCCAATCGAACATTCACACCTCCAATGGTGGTTAAACTACCAGATGCATGCG  
1 TGGAAAGTGGGTGTTTCCACTGAATAGTTGGTCAACAGGTGTGGCATGTTGTCCTAACTGCA  
961 V E V G V P L N S W S T G V A C C P N C  
1021 GGCACGAGCTGAGGGTTTTCCCTCGCGCCGGCAGGTGGGAAATGCCACGCTTTACCGTCGC  
30 R H E L R V S L A P A G G K C H A L P S  
1081 CACACACGCCGCCACCGTTTACGATCCAGCCGACTTACTTGCCTTATTCACCGCTGTACG  
50 P H T P P P F T I Q P T Y L P Y S P L Y  
1141 CTACACCTTCGTCTCCATTATACCTACACCGTACAACGATGAACTCAGACGACTCGCAG  
70 A T P S S P I I P T P Y N D E L R R L A  
1201 ACACTCTCAGAGCGTTGCGTTTTGTCGGGTGGTACTACGGGAATTTGGATTGGCAGGGTG  
90 D T L R A L R L S G W Y Y G N L D W Q G  
1261 CAAGAACATTGTTGAAAGACGCGAGTGTGCGAGCGTTTGTGATCCGAGACTCCGGAGACA  
110 A R T L L K D A S V G A F V I R D S G D  
1321 GGAACCTTTATATTCTCATTGTCCGTGCAAAACGGGACCCACATCAGTGCATTGC  
130 R N F I F S L S V Q T E R G P T S V R L  
1381 ATTACGAGCAAGGCTTTTTTTCAGATTAGACTGTGACCTACCGCTCGCAAGGTACATGCCAA  
150 H Y E Q G F F R L D C D L P L A R Y M P  
1441 GATTGAGATGCGTTCGTTGAACCTGGTCCAGCACTACACGAGAGTAGGCGACAGAGGCGCGG  
170 R F R C V V E L V Q H Y T R V G D R G A  
1501 GAGGCACCGTGTGGGTAGACAGAGAGGGTGGCCCGCACTCTCCAGTACTCCTCAAAGTAC  
190 G G T V W V D R E G C P H S P V L L K V  
1561 CACTCCGGCAAAGTCCACCTTCCCTCCTCCACGCGAGCGAGGCTCGCCGTCCACAAAGCCC  
210 P L R Q S P P S L L H A A R L A V H K A  
1621 TGGACTCGAACCCTGACACCGAAGCTCTGGGTGTGCCCCCAAACACAGGCTCCTACCTC  
230 L D S N P L T P K L W C A P K H R L L P  
1681 TTCCATCAACGCTTATAGACTATCTCGGTGAATACCCGTACTCGATCTAACACCAAGATC  
250 L P S T L I D Y L G E Y P Y S I \*  
1741 TGATATAGTTGATTAAATCCGAGTGATGAGTGAAGATATTAGTCGATTTAGTTAACTAACT  
1801 CGATAATCGATCACACTAACGTTAATCATCGCCTCAGCATTATCATAATATATAATTAT  
1861 TTTGTACAAAATGTATAATAATTAATGGAAATACTTAGCACAGGTTGCTAATTAGGGCCG  
1921 GATCCTATAAAATAACGTTTTAACAATGTATATTTATGTTTAAATTAACGTATTAATAAT  
1981 AAGTATTGAAAATGGGACTCAACTACTATGGTATTTTAGTGAAAAATATTTACGCAGTCTA  
2041 TCGTTTAAAGCCGTTCCGTGTTTGTATATAGGGATTTTGTGTTGAAAGTTGAAGACTGATTT  
2101 CCTAGAAGTCTGTAATTATGTTTTTGTGATGTGTGAATTTCTTTATAATTTAACATTCAT  
2161 ATATATTCTGAGTTTTTTTTTTTAAATATTGACTGTAAAGACGGAAATTTAATCTCAGTGTATG  
2221 ATTTATTGAAATATATATTTTCTTTTCTTTGATCGGTAATTATCATGTATCGATATTAATT  
2281 CCTGTTCTAGTTTAAATCGTCTCGAAGGACCATTATGAAAGTGAAAATTCGTGTATAAATA  
2341 AATTTTCATATATAATTTTAT(n)

Figure S1: Nucleotide and deduced amino acid sequences of *ApSOCS-2*. The nucleotides are numbered from the first base of the cDNA (ORF starts from 933), representing the start of the gene. The SH2 domain extending from “amino acid” position 98 to 184 is exhibited in a brown shade. The SOCS-box extending from position 216 to 256 is shown in a light green shade. The conserved domains are shaded. The poly (A) signals (AATAAA) were underlined with red colour. The 3'-UTR instability motifs (ATTTA) were boxed with blue colour.

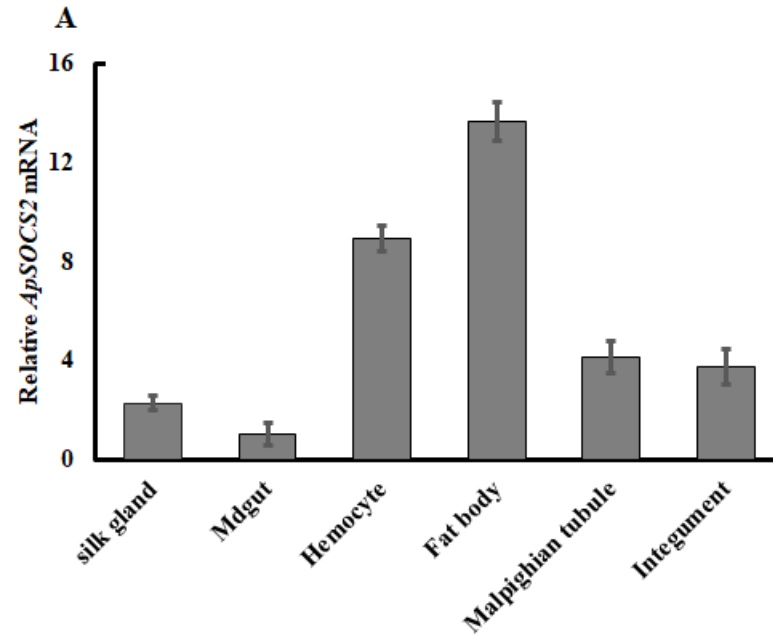

**Figure S2.** Expression profile of *ApSOCS-2* in various tissues of *A. pernyi* normalized to actin-1. The mRNA expression profile of *ApSOCS-2* in various tissues of the *A. pernyi* was determined using qRT-PCR. The values are represented as mean ± S.E.

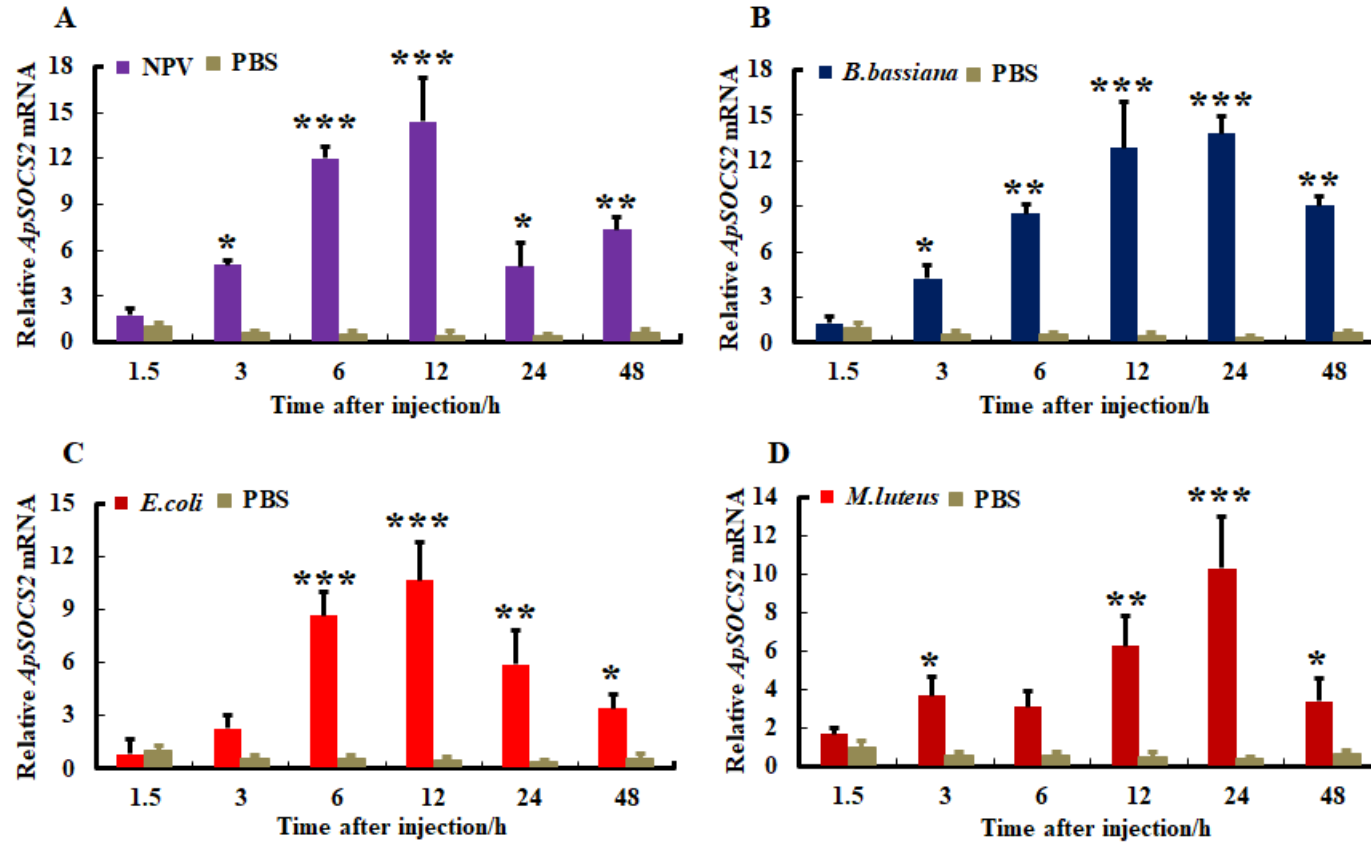

**Figure S3.** The mRNA expression levels of *ApSOCS-2* in fat bodies following microbial challenge normalized to actin-1. Following injection of A: *ApNPV*, B: *B. bassiana*, C: *E. coli*, D: *M. luteus*, the mRNA expression levels of *ApSOCS-2* were analyzed using qRT-PCR. Data of triplicate experiments (n = 3) are represented with mean  $\pm$  S.E. Asterisks indicate significant differences (\*  $p < 0.05$ , \*\*  $p < 0.01$ , \*\*\*  $p < 0.001$ ).

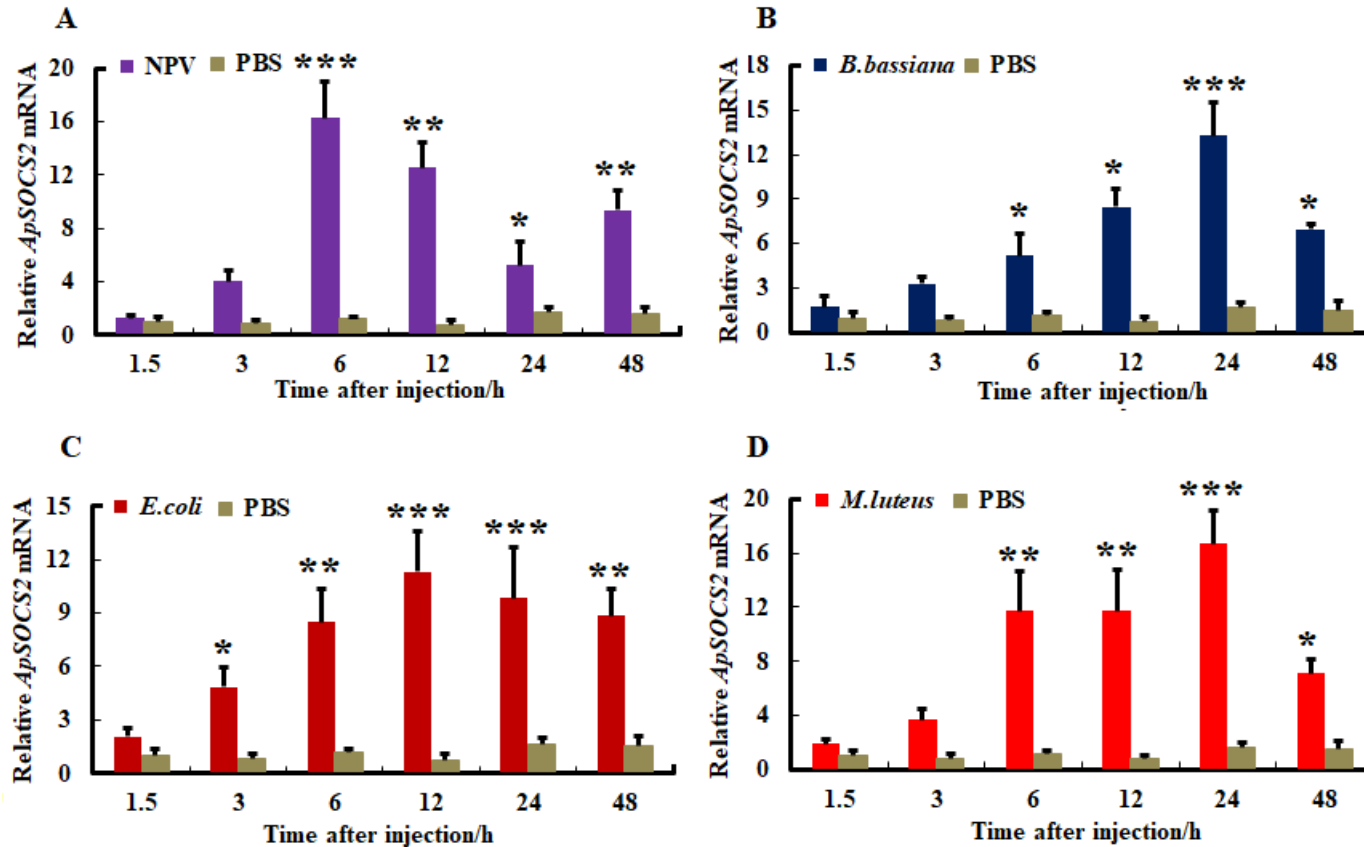

**Figure S4.** The mRNA expression levels of *ApSOCS-2* in hemocytes following microbial challenge normalized to actin-1. Following injection of A: *ApNPV*, B: *B. bassiana*, C: *E. coli*, D: *M. luteus*, the mRNA expression levels of *ApSOCS-2* were analyzed using qRT-PCR. Data of triplicate experiments ( $n = 3$ ) are represented with mean  $\pm$  S.E. Asterisks indicate significant differences (\*  $p < 0.05$ , \*\*  $p < 0.01$ , \*\*\*  $p < 0.001$ ).

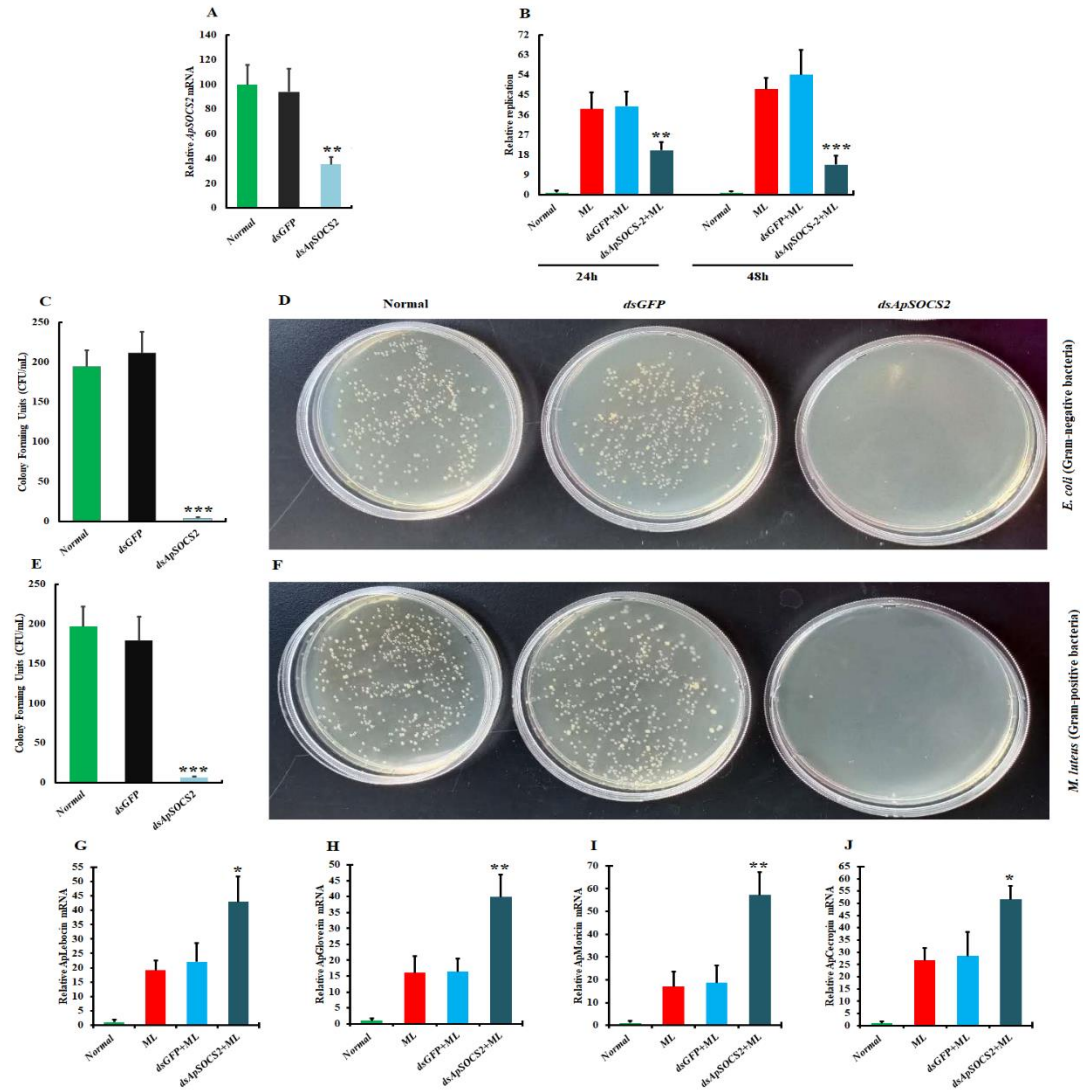

**Figure S5.** Loss-of-function analysis of *ApSOCS-2* on bacterial survival and antimicrobial peptides production normalized to actin-1. A: *dsApSOCS-2* injection strongly reduced the production of *ApSOCS-2* in hemocytes; B: qPCR replication rate analysis exhibited that treatment of *A. pernyi* larvae with *dsApSOCS-2* decreased the replication rate of *M. luteus*. The plasma antibacterial activity was

increased in the *ApSOCS-2* depletion (C-F). Plasma was sampled from *A. pernyi* treated with *ApSOCS-2* dsRNA or GFP dsRNA. Equal volumes (10  $\mu$ l) of plasma and bacterial suspension were incubated at 25 °C for 1 h. Bacteria (*M. luteus*) was injected into *dsApSOCS-2* treated *A. pernyi* larvae, and mRNA expression levels of (G) lebocin, (H) gloverin, (I) moricin, and (G) cecropin were measured by qRT-PCR. Normal: untreated sample; ML: *M. luteus* -treated; *dsGFP*+ML: treated with both *dsGFP* and *M. luteus*; and *dsApSOCS-2*+ML: treated with both *dsApSOCS-2* and *M. luteus*. Asterisks indicate significant differences (\*  $p < 0.05$ , \*\*  $p < 0.01$ , \*\*\*  $p < 0.001$ ).

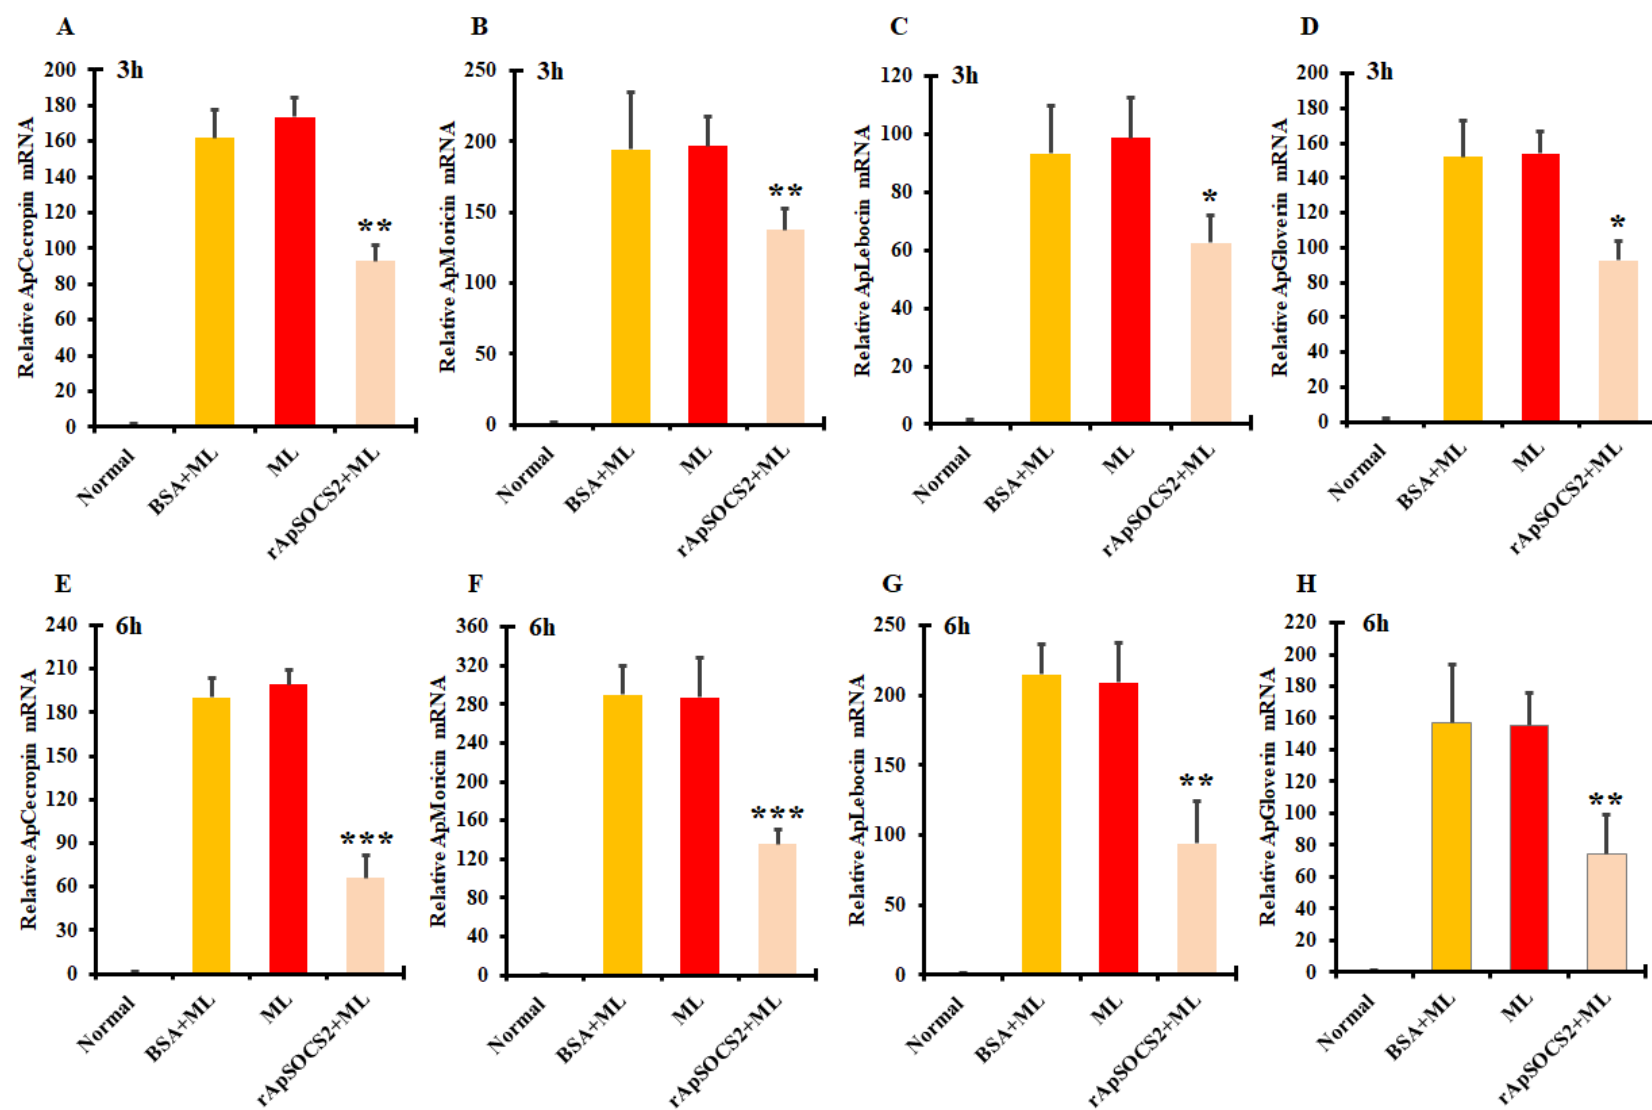

**Figure S6.** Relative mRNA expression levels of the pertinent AMPs, namely cecropin, moricin, lebocin, and gloverin (A–D) at 3 h after the recombinant ApSOCS-2 protein injection and (E–H) at 6 h after the recombinant ApSOCS-2 protein injection normalized to actin-1. Normal: untreated; BSA+ML: treated with bovine serum albumin and *M. luteus*; ML: *M. luteus*-treated; and recombinant ApSOCS-2+ML: treated with both recombinant ApSOCS-2 protein and *M. luteus*. Asterisks indicate significant differences (\*  $p < 0.05$ , \*\*  $p < 0.01$ , \*\*\*  $p < 0.001$ ).



## Fat body

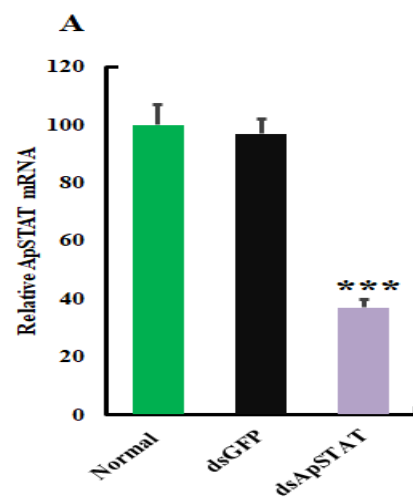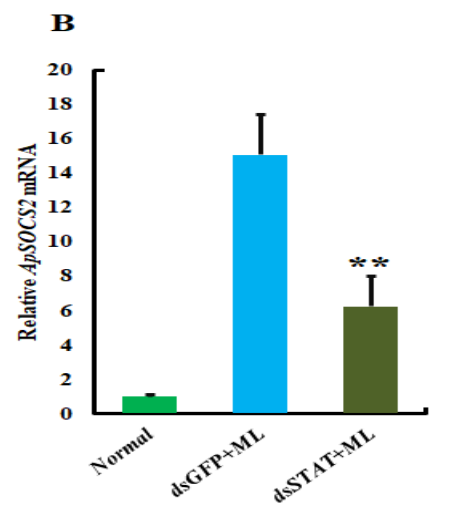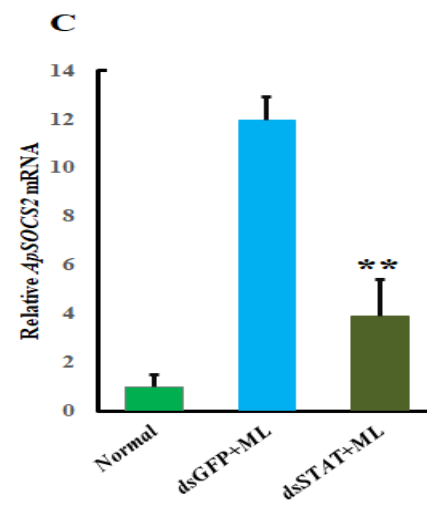

6h

12h

## Hemocytes

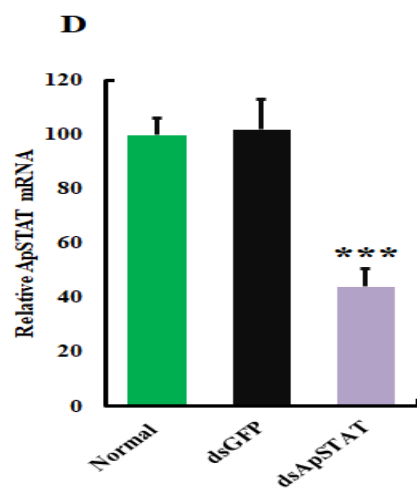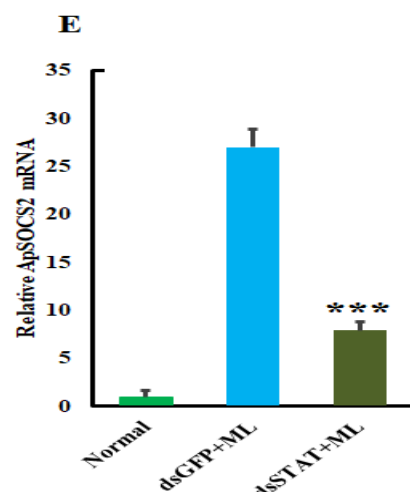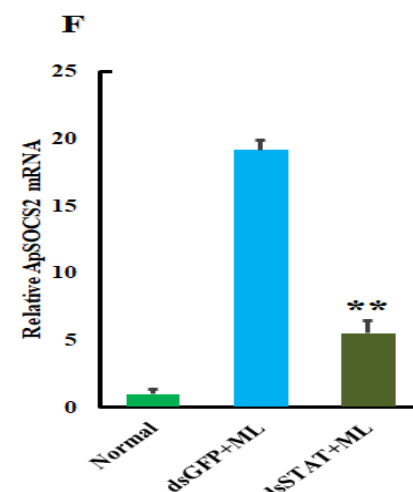

6h

12h

**Figure S7.** *ApStat* regulates *ApSOCS-2* expression in silkworm challenged with *M. luteus* at 6 and 12 h normalized to actin-1. The efficiency of *ApStat*-RNAi in fat bodies (A) and hemocytes (D). (C-D) After *dsApStat* injection, the *ApSOCS-2* expression in fat bodies of silkworm challenged with *M. luteus* at 6 (B) and 12 h (C) was detected by qRT-PCR in fat bodies. Following *dsApStat* injection, the *ApSOCS-2* expression in hemocytes of silkworm challenged with *M. luteus* at 6 (E) and 12 h (F) was detected by qRT-PCR. The GFP-RNAi was used as the control. Asterisks indicate significant differences (\*  $p < 0.05$ , \*\*  $p < 0.01$ , \*\*\*  $p < 0.001$ , \*\*\*\*  $p < 0.001$ ).

**Table S1.** Primers used in this study.

| Primer Name | Fwd./Rev. | Purpose                | Sequence (5'-3')                        | Reference  |
|-------------|-----------|------------------------|-----------------------------------------|------------|
| ApSOCS-2    | Fwd.      | Amplification of ORF   | AGACGTTTACATTGGATCCC                    | This study |
|             | Rev.      |                        | TACGGGTATTCACCGAGATAG                   |            |
| ApSOCS-2    | Fwd.      | Recombinant expression | CGGGATCCGTGGTTAACTACCAGA                | This study |
|             | Rev.      |                        | CCGCTCGAGTCTCGTGTAGTGCTGGA              |            |
| ApSOCS-2    | Fwd.      | RNAi                   | TAATACGACTCACTATAGGCCGACTTACTTGCCTTA    | This study |
|             | Rev.      |                        | TAATACGACTCACTATAGGGAGTGGTACTTTGAGGAG   |            |
| GFP         | Fwd.      |                        | TAATACGACTCACTATAGGATGGTGAGCAAGGGCGAGGA | [31]       |
|             | Rev.      |                        | TAATACGACTCACTATAGGTTACTTGTACAGCTCGTCCA |            |
| ApStat      | Fwd.      |                        | TAATACGACTCACTATAGGTTGTTTGGCGCCATGGATTG | This study |
|             | Rev.      |                        | TAATACGACTCACTATAGGCGTCTCCTCGATCTGACTGC |            |
| ApSOCS-2    | Fwd.      | qPCR                   | CACGATCCAGCCGACTTACT                    | This study |
|             | Rev.      |                        | GACACTCGCGTCTTTCAACA                    |            |
| ApStat      | Fwd.      |                        | AAGCTGACGTTGCTCTTCCA                    | This study |
|             | Rev.      |                        | GACCCACGTCACCTTATCG                     |            |
| Ap18s rRNA  | Fwd.      |                        | CGATCCGCCGACGTTACTACA                   | [18]       |
|             | Rev.      |                        | GTCCGGGCCTGGTGAGATTT                    |            |
| ApActin-1   | Fwd.      |                        | TCGCGATCTCACAGACTACC                    | This study |
|             | Rev.      |                        | TCGTAGGACTTCTCGAGGGA                    |            |
| ApCecropin  | Fwd.      |                        | CGTCCTGGCTTTGACAACAG                    | This study |
|             | Rev.      |                        | TCTCCTAAAACTGCTACCGC                    |            |
| ApMoricin   | Fwd.      |                        | TCTTATTTTGTGATCCTTGCG                   | This study |
|             | Rev.      |                        | CAGCACTGATCACACGGAAC                    |            |
| ApLebocin   | Fwd.      |                        | ATGATGATGCTCCGGGTGAA                    | This study |
|             | Rev.      |                        | CCTCCAGAAAGACCCATCGT                    |            |
| ApGloverin  | Fwd.      |                        | CCCGTCGTCATTTTGTCCAA                    | This study |
|             | Rev.      |                        | GGCAAGCGTCTACTCACAAG                    |            |

|          |      |  |                        |      |
|----------|------|--|------------------------|------|
| 16s rRNA | Fwd. |  | AGAGTTTGATCMTGGCTCAG   | [48] |
|          | Rev. |  | TACGGYTACCTTGTTACGACTT |      |

**Table S2.** List of species, genes and their accession numbers used in this study.

| Sr. no. | Gene          | Species                    | Accession no. |
|---------|---------------|----------------------------|---------------|
|         | <b>CIS</b>    |                            |               |
| 1       |               | <i>Mus musculus</i>        | NP_034025     |
| 2       |               | <i>Homo sapiens</i>        | AAH31590      |
| 3       |               | <i>Danio rerio</i>         | NP_001070085  |
|         | <b>SOCS-1</b> |                            |               |
| 4       |               | <i>Danio rerio</i>         | NP_001003467  |
| 5       |               | <i>Homo sapiens</i>        | NP_003736     |
| 6       |               | <i>Mus musculus</i>        | NP_034026     |
| 7       |               | <i>Rattus norvegicus</i>   | NP_665886     |
|         | <b>SOCS-2</b> |                            |               |
| 8       |               | <i>Papilio xuthus</i>      | KPJ02665      |
| 9       |               | <i>Papilio machon</i>      | KPJ08265      |
| 10      |               | <i>Danaus plexippus</i>    | EHJ63976      |
| 11      |               | <i>Antheraea pernyi</i>    | Present study |
| 12      |               | <i>Tribolium castaneum</i> | EFA08217      |
| 13      |               | <i>Eriocheir sinensis</i>  | ACU42699      |
| 14      |               | <i>Crassostrea gigas</i>   | EKC24772      |
| 15      |               | <i>Rattus norvegicus</i>   | NP_478115     |
| 16      |               | <i>Homo sapiens</i>        | NP_001257400  |
|         | <b>SOCS-3</b> |                            |               |
| 17      |               | <i>Oncorhynchus mykiss</i> | NP_001139640  |
| 18      |               | <i>Homo sapiens</i>        | NP_003946     |
| 19      |               | <i>Mus musculus</i>        | NP_031733     |
| 20      |               | <i>Rattus norvegicus</i>   | NP_446017     |
|         | <b>SOCS-4</b> |                            |               |

|    |               |                                |              |
|----|---------------|--------------------------------|--------------|
| 21 |               | <i>Drosophila melanogaster</i> | NP_523593    |
| 22 |               | <i>Homo sapiens</i>            | NP_543143    |
| 23 |               | <i>Mus musculus</i>            | NP_543119    |
|    | <b>SOCS-5</b> |                                |              |
| 24 |               | <i>Danio rerio</i>             | NP_001107269 |
| 25 |               | <i>Homo sapiens</i>            | NP_659198    |
| 26 |               | <i>Mus musculus</i>            | NP_062628    |
| 27 |               | <i>Rattus norvegicus</i>       | NP_001102744 |
|    | <b>SOCS-6</b> |                                |              |
| 28 |               | <i>Bombyx mori</i>             | NP_001185652 |
| 29 |               | <i>Drosophila melanogaster</i> | NP_523659    |
| 30 |               | <i>Rattus norvegicus</i>       | NP_001258078 |
| 31 |               | <i>Oncorhynchus mykiss</i>     | CAP17278     |
| 32 |               | <i>Homo sapiens</i>            | NP_004223    |
|    | <b>SOCS-7</b> |                                |              |
| 33 |               | <i>Drosophila melanogaster</i> | NP_523390    |
| 34 |               | <i>Homo sapiens</i>            | NP_055413    |
| 35 |               | <i>Oncorhynchus mykiss</i>     | NP_001182101 |
| 36 |               | <i>Danio rerio</i>             | NP_001274006 |
| 37 |               | <i>Mus musculus</i>            | NP_619598    |

**Table S3.** Statistics of the transcriptome sequence data.

|                                      | Clean Bases   | Clean Reads | Mapped Reads | Mapped Ratio (%) | Q20%  | Q30%  | GC%   |
|--------------------------------------|---------------|-------------|--------------|------------------|-------|-------|-------|
| <i>dsApSOCS-2+Micrococcus luteus</i> | 6,923,641,600 | 23,130,124  | 18,504,665   | 80.00            | 98.10 | 94.43 | 42.55 |
| <i>dsApSOCS-2+Micrococcus luteus</i> | 7,797,146,398 | 26,102,106  | 20,111,717   | 77.05            | 98.22 | 94.63 | 43.40 |
| <i>dsApSOCS-2+Micrococcus luteus</i> | 5,967,163,040 | 19,942,159  | 16,024,304   | 80.35            | 98.23 | 94.69 | 42.91 |
| <i>dsGFP+Micrococcus luteus</i>      | 6,737,393,200 | 22,531,058  | 17,926,445   | 79.56            | 97.63 | 93.25 | 42.68 |
| <i>dsGFP+Micrococcus luteus</i>      | 5,970,481,000 | 19,948,172  | 15,703,121   | 78.72            | 97.56 | 93.08 | 43.35 |
| <i>dsGFP+Micrococcus luteus</i>      | 8,441,303,376 | 28,210,831  | 22,130,524   | 78.45            | 97.47 | 92.88 | 43.35 |
