# Supplementary material for: Antheraea pernyi Suppressor of Cytokine Signaling 2 Negatively Modulates the JAK/STAT Pathway to Attenuate Microbial Infection
Source: Int J Mol Sci. 2022 Sep 8;23(18):10389. doi: 10.3390/ijms231810389 (PMC9499667; doi:10.3390/ijms231810389)
Supplement: Supplementary file 1 [file ijms-23-10389-s001.zip › File S1. Assembled sequence.txt]

>c10.graph_c0
TAAAATCAGTTTGACTGTTTTTGTCTCAAACAAACAAATAGACGCACAGCTAATCATTATTCATATACTACTCGCTATCACCGACGTCATGCAAATAAGAGTTTGTGATAATATTTGTCCGTAAACACATTAGTTTGCAAAAGACACCAGCTGTTTCCTCTCTGAACAAACGAATAATAAAAATAATTCATGTGACAATTGAAGACAGGTGTGAACGAAGGTGATATGCAACAATTTCTTTATTTTTCATTCTATGACCTAAATCAAAGTGTTTATTTGTATACGTATTTTGTTCTTACAAGGTTTTCACAAATAGGCTTATAAATGAAAATACTGAAACTATATTTATCTATATCTATATACGGG
>c10029.graph_c0
CTCCCATAAGAAATTTCATTTGAAATTTCTATTTTCACTTTGAATTTTTTTTTCTGTTTTTTATTTATCAGGGGAAACAAACAATTGTAATCAGAAATGCACGTAGGCAATATTGATGAATAATCAGTGTATCAGTAGTGCAAAAAAACATTGCTTATATAGTTCTTTTTCGTCGTAAATCACCGCCTTTAGATGATAGAAATAATTCCTTAGATATATATTACTATGTATGTATAGAGCGGTACTATATTGGGCGCATACAAGTGTTGAATATATTTTTCGCACTTAAAATATTTTCATTTAGTTCTAAAATTAACTAAATATGTTCTAGAAATTGATGAACATGTAATTAACATGTAAGAGGAGTATAAAAACATTATAATCAAATTAGGTAACTTTTAGATCCAATTATGTATATATTTATTTAGGAGATTAATACTAAGCACAATTTTG
>c10030.graph_c0
GCCAGAATCAATGCAGTGTTGGAGGGAACTGATTGATAAGCACAATGAGAGCCTGATGATCCACCCTGATAAGAAAGTCTTCGATAGTATCTGGCAATATGGGTTTCTCTCCAAACTTTCGGCGTACAGATGCCCCATAATTTACGCTAGCACATCTCTGAATTTCCACATAAGCGTGCAGCATTTTCGAACAATTAATTCGCAGATTATGCCAGAAAGGCTGGAGTTCCTCAACACTGTACTTTTGCTCACTCTGTTACTTCTGCGTACCAATGATATGTTATCTTTTGGGTTGTACTCATAGTGACGAAATGTGTGTTCCATTGTTCAGTGGGTTCCATTATTTTTGAATGTACTGTGATTAAACAACCAGACAGCGTAGTCACTTTGCCGTGATAGTACAAAGAATACATCGCCTGTTTAATAATTATAGCAATTTCACATTTATATGATTTTGCAACGTTGAATAAAGAAGTATAAATTATATAAACCAGAATAGAATGTCTCCAATAAATTAATGCGAGTTTGATTTAAAGCCCG
>c10040.graph_c0
GGAGAGATATCAGTATGGCGCTACTTTTTATCATGATCAGCGCTAAACACACTTTTCCACACTTATAACTATAACAGAAAATTAGACCAAGTCGATGAGTTAGTTTTAAGGAAATTAACTTGTACCGTTGCGTTATGTCATCAAACCGACATTTTTTTGTTAAAATCCCACAGTGAAAGTAATGTGTGCCTACTGACGTACTTTTAGTAGTGATGATATCGGTTTCAGTACTACGGTAGGTATATACCGAGACAATACAAACTATATTGTTTGGTAACAATGTAATTTATAGAGAATATTGGAAAAAATATATAATCTGTTGCCTGACGCCAAGTCAAAGTAAAACAAAAACTAATTTACCTAATTTGGATTATTTT
>c10043.graph_c0
GCCCTCAGCTCCTATTCTAACTATAAAGCAGTAATCGTCTCTTATGTTACTGTCACATATATTGGTTATTTTACTAGCAATATTTTTATAGCTATGCCAAGAAACTTTAGAATGAAATAGAGGGTAGAGAGTGCCTTACAGATCATAATATGTAAATACAATAATATATTGTATTGTAATATACAGGTAAAGATCCTCTATAATAAAAGGCCTGGCGCGTGAAAGTAACAAATAAGTCATTGTTTTATGATTCAGTCATATCATTGTATCATAAAATGTAACAAAAGAATGACAAATAAAAAGGCGCTAGAAAAG
>c10081.graph_c0
GAAGAGCTTCCTCTTCGGTTCCCTTGGTTTCTCGCCATTTGTAATCTTCAAATCTCCTAATGCGTTCCTTCAAATACTCTGGTATCACCCGGTAGGACATCCATTTTTCTGTGTCTCTCCTTTTCTCCTCCATTTCATCTACTCTAGTAGTAGATGATTGCAAGTACTTCTGAACGTTTCCAATGAGCACAGCAAACAAGAGTAAACCAGAGACACATATGATGATAGCAAAGAAAATCTCCCCTGCAGAGTTGCTTGTCTCCAGGTTTTGGCCCAAAGCACTAATATTACGGAGACCCCACCAAAAGCAATAGACGAATTTCCTGGGAAAATCCTTTGGTTTCACCTCTAGCACCCCTGACTTCAATGCATCAATAT
>c10082.graph_c0
TATAATTTTAATTAAAACTAATACTATCATGAAAGGAAATATATTAAAAACCAGTAGAAAATTGATGACATTTAAGCAATTTAATTATAAGACACAATTTCGATTAATTTTGAGTTTGTTTGAATTCAATTATCTATTTTATAGGTTATGTAAATGTCAGTGAAATGTTTCATTCCCGATATGAAATGTCACTGTTCCCTCTTATATTTCGTTCAACGGAACAAGATGTTTATTAGGCGCTTATACAATAAATACATAGATAATATATTACCCCAATATAATTATATTTGCTATCACACAAATTTAGTAAAGTAGACAAGCAACATTAATGTTGCTTTTTAATGAGTATAAAAATGAAGTATGTATTTATTGTTTTGTAACTGG
>c101.graph_c0
GTTTTAAGGACAGTACAAATTTTATAAGCATTATACGGTCAGCTATGTATGAAATGGGGCAAACGGTGTAAATGGTAACATTGTTTACAAAGACACTTTGTAAGCAGTGTATTTTTACTTTCAATTTTTTTCTTTATTACTTTCTTTTTATACTTTTTCCTCTGAACATGCAATATATTCTTAAAACATTAAACAACATAAACGAAGTCGCGGATATCAATATTATTGGGAATAAAGTACAAGATATAATATAAATTCATAGTATCCTCATAATTAAAGTATCTACTGAAAAGATACCCCTTAAGTATCTCTATTTCACTTCTGTAAACCTGTTCTTTACATGGGTACCTATTAGGGAA
>c10119.graph_c0
ATTATGGCATCGCAGTTTGCGGTGGCCCAGTCAAATAATGTTGAATGCAATTATAGAGTTATGTTTTTTGTATAGATTATATTTAACAAAAAGTGTCAATGAATATTTTTGCGCATGTTGTCGCATGGCGGCCGGAAGGCAACCGCGCGATAAATACACGTCGGAAGTTGATAATACCGTATCTCTTATCCTGACCATGTCTCTGACGAGGGACCAAGCGTTTTGGTTGTACAACATTACTTTTTCATATCGAATGTGGCTATTCTATTAAATTATCACTGGTAATTTATATTTTATCTTTATTAACAAGACGTGAATATAAATTAATACTAGCTATAATAAGCTTTATAAACATATTTTGAGTCGAT
>c10124.graph_c0
TGATTTTGTTGTAATGAAATCTATATGTCGCTCCGAACTACGCTAAAGTTATTTGTCCAATTCTCATTAAAATTTGTTCAATAGTTTTAATTAAATGAACAGAAAACAAAGATTAAAAAAAGTGTATTCTGATTCACTTTTTTTACTCCCCGTAGTCAGTTTTTTGTGAATTTTTTGAACGCAGCACAAGGGCTATAGAGTTTTATTATAATCTAGGAAAGTAGAAGGAAGGAAGAAATAAAGTTGAAGGCTTCGATGAAAATAAAATGTTAGTAATTGTCTTTTCTAGATGAATTGACTGACCGAGTTTGACATAGTTTATAGAGGTGCCACAATCGTTCTGCGTTAAGACATCGAATATTTCGGGTTTGTGGATCGATAGTATTGGAGTCGTAAATGAGGGCGAATATTTAAAAAATGAATACTGGGATAAGATGCGATGTTTGCGATGAAGTAGTTA
>c10134.graph_c0
GCCTCCTATAAAAAGAAAATCCGCATACCTAGCTACCCCTCCCTCAAGTTAAGTCTTATTGGCTAACACTTATAGGTATGTTCCAGTAGCTGCACTCGAGAGCCAGCCATTTTGTTTAGCATCTTTACCATATTGGACTCCATCATCATTGAAGATCAGGTAAGATTGTTATCAAACACCAAAACATATGAAGACTAATAAAAAAGTTATATCATGCATTATTTCTTCAAATATAAAGGATAAGCCCATCATATTGCAGTGAAAGGTATGATAATGGCCCATTTAAAATAATGGAAAAATTAAGTTTTTCCAATACAATATATTAAGATATCAA
>c10154.graph_c0
GCCTATTATTTAATGAAATATTACTCATAATTAACAGACAAACATTTTTTTTTTAAAATCACCACTGGATATAAATTTAAGTTTAGTCTGCTTGATAAAAAGTATTTTACATCTTATTTCATGATATATTTAAGTTATACCATACCATTACAATGTGTCACTTACTTGAGCGGCAAATATTCAAACAAATGTACTATCACATTTATAATATACTAGATTTAGCCAGCGGCTTCACTCACATGAATGTAGAGTTTATCTATCCCATAAGCACAGTACATTCATAGTCATTTCTAATAATTACACTCTAATAAGTAGCTATATGAGATAGATTCTGT
>c1016.graph_c0
ATAATTCATTAAAAAAAAAACAATATTATGGAAAACAACGAGCTTTTTTTTTGTTGATAAAAACTATTATAACACTAATGCTCGCCCATATCTACTAAATAATCAAAAACTATAGAAAATCGGTAGAGATACCGAGAAAAAAAATGTTCTTAACTGATTTCCCTCTGCCTATTTACATATACGAGTGCTTGTCCAGTAGTGAACTTCGACAATAGCAAAAAGAAAAACTTATCCAAATGTTTTTATTGAGGCTAAGGCTCGCCAATAGCTAGAAAACAAAAAAGAATGAAGAAAATTGGGTGAGAATCAGAGGAAGGAGATATATTTAACCGTTTTCCCGCTGCCTATTTGTGTATATATATAAGGTTTTTTCTAATGTCTTATCACTAACTAGACGGACATTAGAAAAAACCTTATTTACACAATATCGTCTCATCACAATATTTTGATTTACCAAAGTTCCGGCGCATTAG
>c10193.graph_c0
GTGGTACACGTTAAATTTGATCTTCAGGCCACGTGAATGAAACTTAAGGGACCCAAGATTTTGATTCTTATGGAGACTTCCATGATTAGTTTGCTTTCTACTTGCACATATCAAATAAACTTTTTCCGCAACACAGCACTTTTCAAAGTTTGTGTACAATTTATAAGATAGGTGTGTTTAGTAATTAAGGCCAAAATTTCTTAGAGATACTGAAATATAAGGGTAACGGCACGCATATTCTTGGCAATTAACAAAAACAAGGTGGCTGTGTAGAGGACGTCAGATGTCTTTCTTATGCTACTCCCATATATCTGCTTGATGAAGCTTCGACTACCGGTCCCGCTAAAATTAACGTCTAAAATCA
>c10222.graph_c0
GTATGTTTCTTCTTCTTCCGCAACATTCGTCACTCTTCTGGTTACGGTTTGTGTTCTGACGAGATGAGAGATGGCTATGGATGGCGTGTTGAAGTTTGAAGGATGAACCATTTTGAAATTGCATGGAGTGTTTGTGAAGTTTTTTATCTCGTGAGCATCGATACCAGGTGTGGTGCACAAGAACCCTATATAATCCTCATAACCTGCATCAAAGATGAGACCAGGGTCTAGAGCAGCGCTTGGATTGACATGACCGCTTCCATAATCAAACGGAGTTGCTTTAACAAGTGTTACTGTCTCTGTTTCAGAATATTGTTGT
>c10232.graph_c0
CCCCACCAACAATCTCCAAGTTTACTCAATGATAAACCTTAGGCTAAACTGATAGTACAACTGGATAAATGGAAATACTTTGAGTGTACACTGTCAGTAAAATGACAGAAACTTAACTAAATGCAAGAAAAATGATACTTTCAATAGTCAGTGTATTGTTGCAAAATAATTACTTAATCGATCATACAATCTACCCAATACCTATTGTGATAGGTTCTCTTGTGATACCAACTATCACAAAACATTTCACAATTGAATTGAACCTTTATGTATGTTTTACATTTATTAGCAAATAAGTGCTGCTTGCATTTTATCATACTTAGG
>c10274.graph_c0
GACATAAAATAAGTGATCTAACCGCCTTTGGGACTTGAGGATAAGCAAATTTTCCACGATTAATGGATTTAAAAAGTATGTATTTATTGATAGACCGAGTATCTACATTTAGCGCTGTCCCCAATAGCGTCTCGCTCGTGTACAACCGGCTTTATGCAGACGTCATTGAATTAGAAGCGCACAACGAAAAGGACACGGTACAATGGTATTGTGTTCCTTGTCGCTGCGCTACGCGATAAATCGAATCGTAGTGGACGCTCGTCCTAAACATACAATAGGGTTGTGGACACATTGTACGTTCTCATTGTATTT
>c10332.graph_c0
GCCGGCGGTAGAACACGCCTTGTGAGATAATTTCCTTACACAAATGATGAGGCCCGATGTATTCAATAACCTATGCATCATTACCAATGCGGACAGTTCGTCTCTGCAACCTGTTCAGGGCATCTAGACGGTATTTTATGACTCCGTCTCTCTCTTTATAAGTGTTGTGTTTACCTGTTCATATTCTTGGTTAGCGTGAAAATTTGAAACTAAAACCATGACCAATAAAAGAGAATACTACCAAACATTAGACCAGCTCTGCATTCCACAAAATTTATCTTTATTGGAGATGATCTCAGCATACCATAATCTCTGAACTATGTCTAAATAGCCATTTTTCGTTGTTTGTTTGTATTTTATCATACTTCTTGAAAACTA
>c10339.graph_c0
GTCCATCTTTCATCAATTTGAATTTTGTTCAGTATGCCAATAAAAGCTTTAGTATTCTTTAGATTCGGCTCGTAAATAAACAAATTTAAACATATATTGTAATACAATTGCTGAAGAGCGTCTCTTTTGTCAGAAGTTTCTAGCCAATACAAAGATTGATCGATAAAAATTTTATGATTAATTTCTAAAGATTCATAAACAAAGAAGAACACCGCAATCAAAGACAAAGGTTCACTAAAAAAGAATTTGTGATAGAATAAATCAAGATATTGTTGTGTTTTATCACTGGCTGTTGTGTAATAAGTTTTCATTGAAAAAGAAATGAACCTATTAATTACAGATTTATCAATAGGCAATTCGGACATAATCAATTTCGAAATTGGCACAATAGATTCTTCATTTTCAGAATTCATATTTTTCTTTGCCTCTTCCAAGGTCAAA
>c10341.graph_c0
GGCTGAGGAATGATATAACCCTGCAGACTGAGTTGGAGTGGTAGGGTCAGCAATCTGAAAAGAAGATGGACCATGAATGTCTTTGATAAGGTATGGGCCATCTCGGCGAGGTGCTAGTTTAGCACTGAAACCCTGCGTTGATTTGCTTAACGCATGAACATCAACCATAACTCGGTCGCCAGGTTGATAGTTAGGGCATGACTGACGTCTTTTATCAGCATACTCTTTTCGTTTCTCCTCTTTCATTTCCTGTATTTCATGGGCTCTTTTCAGTGTAGAGGCCATCATCAATAACTTCGGTGTTATCTCAGGAACAAAATTCTCATTTTGTACTATGTGTCGCACATCATGATTTATGTCGTCGACCGTGCGA
>c10344.graph_c0
GCGCCGGGGCAATGACTAACGAAGGTAAGATGCTGACTTTTGAAATGGGCGCATTACTTAGAAAGAGATATAATGATTTCCTTGGACCTTACTACGATGCCGAGAACACCATAGTAATAGCATCTGATACGGATTTGAGCAAAATGACGGCCTTGCTGATATCAGCGGGGCTCTGGCCACCTCCAGAAGAACAGCTCTGGAACGAGACGATCATGTGGCAACCGGTACCTTACACGTATCCGCAACGCGACGAAGACTATCTTCTGTATGAAGAGAACTGTCCACGGTACAAACAAGAGAAAGAGAGAACTGTCCACGGTACAAACAAGAGAAAGAGAGAATACTGAAAGCGTTTCAAGATGAAGGTCTACTGACACCGTACAGAGACTTCTTACACAAGATCGCACAAATGACGAA
>c10349.graph_c0
GTCAATGATTTACTATTCTACAAGTTTTTTTTTTGTATACTATACTATAAGAACAGTTTATTAAACTTCATCTTCATTTGTTTTCAAATTATAACCTGAATGTGCTAATTCTAAGTTTTGAACGTTTTTCTTATGTTTTCTGGTATCAGGTATGCTGTTCATGTAATTTTATGTGGTCATTGCAGCCAATATCTATGCAGAATCAACCGCAGAAAGACAGTAGTCCTAAGAGTAATATTAATAGTTTGCTACTCCAGAGGACTGAGTTTATGCACCATCTTCAGCAGTATTTATTACTCTACATTGGAGCACTGTAGTTTGAACACAGCCTCTTTGTGGAAGCAATAGATGGGTTAATCAATCAGTCACAGGTTCTGGCATTAAAAACAAAAATAGGAGGATTCGCATAAGTACGTAACTTTTATCAGAAAAG
>c10383.graph_c0
GGGTAAGAAGATGATGATTAGATAGAACCATTTCTAACTTTTACTAAAATTATTTAAAATATGACATATGTATATGACATATATATGGACAAATGAAATAATAAGTTCTAATATATGACATATATATGGACAAATGAAATAATAAGTTCTAAACTATTAAAATACCTCAGTTCATATAAACCTAGTAATTATAAAATTTCTAAGTACAAGTGGCTTGTAAACGATAATTATAAAAAAGTACTCAGCAAGAGAAAATATTTCAACTTACAGGCACCATGTAGATACCTAATTTAAATATACAAACTACATTTTTGGTAAAAGATTTCGTGATTTGTGAATGAGCTTAGGAAAACACTAA
>c10385.graph_c0
GTCGTGAAGTAGAAAACAGGCATGCAGTTGTCTTAATGCTAAGTAGACAATATAGCCTAGCTATGTATAATCTCCCTTAAAAAAACGTACTCCTAAGGCTAGTAATAATAGGTTTCTATTCCTGAGGACTTAGTTAGAATGTGAAAATGTGTGTTGCCAATCATATCTTTGGGAACACAATTTAGTAAAGCGAGTACTGCTACTTTAAAGCAAAAATTAATGTGGTGTCACATCCTGATTCCTTCCACCCTTTACGTAGGCTCTCCCACTCTTTACATAGACTCTACCAATCTTGACACACACTGCCACTTTTTACACTGGCTCTTTCAATCTCTATTGTGTGCTAGCATTTGCTCGCAATTTCGTTGGCGTTAATGTAGATTTGAACTATCCATCGGTAATATTATATTTAATCTGGATGAACGAAACTTTATGTCTTTTTCTGTACCCCTGATACGTCTATGCAAAATTTCATGATGATCGG
>c10392.graph_c0
GTGGTTTGTCGGTTGGTTGATTGATTGGTTGGTTGGATGATTGGTAGGTTGGTTGATTTACTAGTTTCGATAACCATACCATCATAAGCAGCAGCAGAGTGCCAATCGTGGAATGTCAATCGTGGATCACTGAGGTTAATGCACAGCTAACTAAGGAGAGAACGCAGCGACATCCATATAATATAGTGTATAGTTTTAGGAAGACATTTGTGAAGAGTGAATAAACGCCATGTTCTTTTCAAGATCGATTAGTTTTCATTTCCAGCCAACTTCTACGAATACTGTTCCGCCACGTATTACGAAGTTAGAATCGTTTTCTCTTTCGTAACACTGACTTAACTTGAAGATAATAG
>c10400.graph_c0
AGAGAATATAAATTGTGTGCCACGCGCTACGCTTACAAAGAAAAAATTAGAGTAAGATGTAAAATAATATGTACACAGGGTTGTTTTGTTATAAAAATAATACCTATATTTAAATTCAAAAAAATCGCAAAGTTAAAGAATATTCATGTAACGTTACCGCGTACCATGAAAATTTCTTGTTCATCATAAGCTAAAATATTCAGTTAATACGTGAACAGAAAAATATTCAGTCTCCCAAAAAAATACAGGTGTACACTTTACACGTAACATATTATATTACACAGCGGTGGTGTTACCGTAATTTTTTTGATAAA
>c10422.graph_c0
GTCGGCTAGTAGCTAATAAAGGACGAGATATTTGCAAACTTACTTGGCATTTCTGATTATATTTTACGCAATTTAAACAATATCTTTGGAAACTATGCTCTATGCGGTATGTGTATAAGGTATATTACTGTAAAGTAAGCATTAATTTCTATTTATTTCAATCATAATCCCGACTTGTAGTAGTTGTACAACTTTACCAAATATATGACGACTTTAAATCAAAGAAACTGTTTGTTGTTCCTTATAGATAATTACACCAACATGGAGAGGTGTTTAGGATGTCCAGCGATTTTCCTTAACGAAATTTATATGTAATAA
>c10438.graph_c0
AGGTTGAGGATCAGAATTTCAAAGACCTCACGTAAGAAGTTTCACGTAAAAAAAATGATACATGTATATTAAATTAAACCAGTATTCGTCTATAATAGAAACCAGAATGTTAGACACCGCGTCAATCGACGTAGGTCCGATTCTTCAATGAAGAAGCTGGATAAAGCGCGAATTTTCAGCGTAGGAGAACATCCTAATGAAACATAGCATGTTGGTAGCGCTTTTTCTAAGCCCGCCTCACTCTAGCATCACCCTCAGCATGAAAATCAGTCACCAAGCAAACACCTACGATTATATTCCGGCG
>c10448.graph_c0
GATGATGTTTGGGGTCTTTTAGGCACTGCTGCCTTTGCTTTCTTCTGTTTCTACCTTCTACTTGCTGTTATCGCTGGGGCAATGATGCTGGGTTTGAAGCTGGTCTTCATTACCATTCATCCAATGAAATGGGGAGCTACTCTAATGAACTCTTTCCTCTTCAATGTCGGCCTCATTCTTCTTTGTTCAATCAGCGTGATTCAATTTTGTGCCACTGCATTTGGATATTACGCTCAAGCCACTGCTGCCCAGGAGATATTTGGCCACACATTGCAGTCCCTTAGAGGAATTAAGTACCTTTACAAGTACAATGTGTTCCAAATCGGGTTTGTTATCCTGGCTGGACTGACTTTCCTATATTACATTGCCTTTGGATGGAGAAGAAAAAAAAACTAGTGGCCGTTTCCAGCTCTCTTCTTAATGTA
>c1045.graph_c0
TTAGCAATTCAATTATAAAGTCGTGTTTTATAGTTTTTCCAATTAAATATATATCTTATATAACCATAAACCGTAAACGGACGGCTGCTAGTAAATAAATAAGTCTAAGGATACATCGGTAAAAGAACCTAAGACCTTAGAACCCTGAGTATTGTACTGATCACATAAAAACCAGTCGAGCGGGAAGGGAGGTGAATTCGCGATTTCTCGACTTAATAACGGGGTTTTTACCACTACACCACGAAGTGTGTCGATTGGTGTGTAATTTTAAGTTCTGTTTTATAAGAAGCCTAACGAATTAAAATCATAGAAATATCTAACACGATAAA
>c1046.graph_c0
GCTTTATATTCCACAGATAGATAATATGTTTTATGGAAACTACTAGAAAACTATTTTAATCATTGTATCATTAACTCATTAAACATGTCTATTTCTATTAGTATTATAAACACGTTTATACAAATGTTAAAAGCGATAAACAAAGTGGGTGTTGTTCCGGGCGAAACCCTACGCTGCGTCGCGGGACGAGAGGGTCGGTCGGCCCAACTAAAATTAACGAGTGGACCCCTAAATGTCATTTATGGACAGGTCGGACGTGTTTATTGGAGTGAACCAACAAGTCCCCACTAAAACGACTGGTTTCATTATTTGTACGCGGCACGGTGCGCGGC
>c10473.graph_c0
GCTCAGAAATTTTTCTCCAAGGTAAAATCGGTTAATTTTGAAATGATGTTCTCATCTTCATTGGCTTAATGCTTAAGACTTATTGAAAGCCAGGCAAGTTTTCTGCTTCTTTTGCTTCTTAGTCAGGAGATAGATAGATTACGTTTTTAGAGTTTAGTAATGAGCAATAAGTCTTAAAATAGTTGGAGAAATGACGAGATGTAATCGTTTTCTTTTGTTTATGCCTATATCTTGTTAATCCACAAACATGTACATAGATTCTTCAGAAGAATGTTAGTTTCTTTAGATTCTTCAGATAAACTTGTGTCTTCTTACCGATTCTGAGGTAGTGGCAAAAGTGGGCTGAGTGCTAGAAATTTTTGAATGTTCCTTGTGATAAGCCATAGAGGTAAACCATTTTTGA
>c1049.graph_c0
GAAGAAGGTTACAAAATCGTGATTATGTCGAATCAAAGTCAAATAAAATCGAGCCAAAAAATTTATAAAGATTTTTTAGATAAAATAAATGAATTTCATAAAGCACTTAGTCTTCCTACATTAGTCTTAGTCGCTTTAAAAAAAGATAAGTACAGAAAACCATGTATTTGGTCTTATAAATGGCTAAAGGCTAATTATTTTCCTAATGACGATCTTATCGATAAATTTTTTGTTGGAGATGCAGCTGGGGAAAGAAAAGGCGCACCCTATCCTATTAATTGTGATTTGTATTTTGCTAAAAATGTTGGAATGAAATTTTATCTTCCTGAAGA
>c105.graph_c0
AATTACCATTAAATCTGGCACAGGAAGATTCACCCATTTGTAATTTTAGTAAAAATAGTTCACGAGGTAGGATGCTGCGAGAATGTAAGGTTTTAGTGTGGGATGAAAGTACAATGTCTCATAAGAAGATTATAGAAGCTTTAAACCGGACTCTTCAGGAATTGCGAAATAGTACAGATATAATGGGAGGAATAGTAGTTTTATTGGCTGGTGATTTCCGACAAACCCTCCCAGTCATTTAGAGGGGGACACCAGCAGATGAAATTCAAGCATGCATTAAATCATCAATCTTATGGTCGAGAGTTGAAAAATTCAGCCTAAAAACGAATATGCGAGTGCATCGTCATAATTATGTGGATTCGGGACTTTACGCAGAAATGTTGTTGAAAATTGGTG
>c10554.graph_c0
GTCCGGTGCCGCAGGCTACAGCTTGGTATAAACACAGAGTTATGACAGTTTTAAAAGGTAACCAGAAACTAAAGATAGAGCTGTCATAGACAAACACAGTTTAATAAAAATAAACGTGTATGTGGACGCCAGGTAAAATGGTTTAAGTATTTAACTCAAAATAAGAATCACGAGCGTTCCACATGGCATGGATACCGACGCCACGCGCCACGCTGCGATGCGACGCGGTGGACGTGGTAACGATTTTCCCGACAATACAGCTGAGACGTGTGGACTTGCGCACTACGGTTTCACGCCACGTGGCTGGCACATCCCATATCACGTAACTTTTAATTAAATTTATTTACACAAACATTACAAAGTTAATAAAAGATTAAAACATACATATTTCGGGTCGAAATCTTAAGTA
>c1056.graph_c0
AACACCGAATAAAAAAAACCTGCTGTCAGCGTAAAACATTATCGAAAAAACGTTTTTGTTGATGATATACGTTTATAACGTTTATTTTGTATTTCTAACAATATATTTAGACATATCAAATAATTTAATAGGTAGACAATAGATTAAGAATGGCATCGCATTATTTTATCGTTTATATTTGTCAATAGGACTTGTGAAATGTTAAAAAAATAATTTAGTTTCCTTTATTAAAAGTTACGTTTAGTTGAGATTAACCTAAGGCTATAATAGATATTGAAACCAACCGAGATATTTGAAGTATACGTAGACGAATACTAGATACAATGAATAATTAAAAGACTCCTAGGAGTTTAAAATAGCCTATGAAATTGCAGTTCGATGTCAGTCACTTTTAGTTTGACTAGCGAATTCCAAATATA
>c10565.graph_c0
GGACAACTACGATAGGCACTTAACGCACCTAGGGCGTAGTGACAGTTTCGCACGGATTGCCCATAACTCTGGCAGTTATGGCACTGCATCGGGGTGTGGAACTTGCGCGGGGCCTCGACGGTAATGCCGGTGAGGTCATAGAACGAGGTGAGGCTAAAGATAAACTTTCCCTTTTGGAACCGGTCGAGAACGGCCAGAATCATGTTGTAGGGGGCTTTGGTGCGTGGGTGGTACATCCTGTGTATCTCACGGACGGAGAAGTCGTATGCTTTCAGACAAGCGATGATATCCTCGGTCGAGATCTCGACCGGGACACGCCTGGGGACGGCACGG
>c10569.graph_c0
TTTAAATTATCGCTAGTAGCATCATCTACAAATTGTTCGCTACATATAATAGGACAAATGTGCTCGTTAATGTTATTCAATGAAGAATAAAAGTGTAATTGAGTGAACGATTAATAAACTATTTTTATAAAGTGCCAGTAACAAAAACGTGGACTGTGTAGATGACTTGATTTTGTACATAACAATGTGTTACCTGACAATAAAATTAGCTGTATTTTTTTACTGTTTGTGTGATGTGATGTGGCCGTGCCAAAATTACAAGGTCGTGCGTGTGTGAATATTATAGTAAATTAACGTTTAAAATAATAGCTATTTTTAAATAAGCTACTTTAGAATGG
>c10585.graph_c0
GGCGTCACCAAGGGAAACATTGTGCCGTCACCAAGGGAAATGTTGTGATGTCACCAAGGGAAATATAGTGACGTTACCAAGAGCAACATACGCCAATTCCATATGAATATCAACAGTTCGACAATCCGAACAATAATATCGCTGGGCTTAAATATCACACAACCGTATCCTTGGCTTCACACGTATTTCTTACACGACACATAATATTCTCAAACCCTGATTTACATATAGTTTATGATCTTAAACTTACTTTCGGTAATTGTTAACGGCTATCAATTTTATAGCAAAATATTATTATACTCTCTGTATAGAAAATGTC
>c10590.graph_c0
AACACTTCTCAGGTTTCGTGTAACATTTCACACACACATTTGTCGAAATCTTAACACCAATCCCAAATCAGAAAAATCAAAACTTTTTATTTTATTTTATCAAAATGGCGCTTATGAATGGAAGCATGAATCTATCATCGGTCAAATCATCGATGATCAACCACCGTCAACCAAACTTCTCCTCCGCCGTCTCCAGACCCACTTCTTTCCGGATCTCCGCCGTGCAAACCGACCCAAAAACACCAGCTGCTTCATCGGCGTCGGCGGCGACGACGACTCCGGCAACGTTGACGAAGCCCGTTGGAGTTAATGTGGGTAAAGGAAAATGGGCACCAGAGAGTTGGAGGACGAAGAAAGCTTTACAGCAACCGGACTATCCAGATTTAGCTGCGCTTGAAGCTGTGCTAGAGACGATCGAAGCTTTTCCTCCGATCGTGTTCGCCGGAGAAGCTAGATTGCTTGAGGAACGATTAGGACAAGCAGCGATGGGTGAAGCGTTTCTGTTACAAGGAGGAGATTGTGCAGAGAGTTTCAAAGAGTTTAATGCGAATAACATTCGTGATACTTTCAGGATTCTTCTTCAGATGGGTGCTGTGTTGATGTTCGGAG
>c1060.graph_c0
CTGGTCATTGCTGGGTTCTCAGCACCCTTGGCCCCCACTGAAGTTCTAGGTGAAGCCCAGTGCTGGGGGACAGGGTCCTCTTCCTGACAGTGCAGCCTGTGGGATGACTTGCAAGGTCCCATATGGAGGTAGGGGGTGGGATGTTGGCCTGCACTGGGGCCAGCGTCCTCAGGAAGGTGTCTTGGAGGAGGTGGCGGCAGCTGCCCCTTTCTTCTTGGCTGGGGCCTTCAGCAGTGCCAGCTTCTTGGGCAGGCTGCTGCTGGCTTTCATCACCACGTCATGTTCGATCTTCTTCCGGATTCCGACTTCTAG
>c10605.graph_c0
AGAGACAAAAATGATGATAAAATACGTAATGTATTTTTGGTAAGCTGATTATATAGTAATTTATTGTAATGTATTGTTGAATACATCAATATACACTTATATAAATCAGTCAGTTCAAAAGCGTAAAAGGAACCCTAATTAATCTTAAAAGACAAAAGTTTCATCTCTGGTTTCGTTAAAGTATGTCACATAGTATTTTTCTATTATTACTCCTTTTTATTCTTAGCATCGATATTCAGGTGTGAAGCGTAATATTATAATTTTTCAATAATTCACTAACTAATATTCAAACAGAATTTTTT
>c10609.graph_c0
ATTAAACTATAAATTTTTATTGTTTTTCATTATAAGTCTCCCTACACATTTTAATAGCTCCCTCTAAAGTTCGATTTACACCAATAAATCCCGAACTATGAACAAAAAACCCGCCCTCGATCAAATCTTTCAATTCTTCTTCTCTTTTTCCTCTCCACTCGGCTTTCAAAGGAAGTTTCGATTTAAATGTTTTTTTGTCTTCGTTAATTGCTCTGATTCTGTACTTGCCCATTGCTGGAAATATCAAAAATAAAATGTTTTTATTAACTTTACGTTCTACATCTAAGATTAAATTGGGATAAATATAAGTATCACTCACTAAAATATAATCATTATGATTAGATAAAAGTTTTTCTATTTCTATAAACTTATAATACCAACAGTTAAGCAACTTTGTCATAAAATTTTCAAAATCTAACGACACAATTTCAACAGCTTTGTAAAATTGTTCAGTTTGTTTTTCACAAA
>c1061.graph_c1
ATGGGGCACTGAATATTCACCCTTTGGCCGTTGTTAAGGCGCACAGGCCTAAGCAAGTCAGCATTTATCTCAGCACCTGGCCTTCTGCAGTTCTCACATCGCCAACCCTGTTGTCCTCCATAGCATGTGCAAGTGCAGATGGCCCCCAAGTATTCTTTCTGCCACTGGTTTCCAATCTGGTACATCTTTCCATCATCGTAACATATGGAGTCATGTGGTTCACACTTGAACTCTCCTTTGCCATTGCCCAAGCAAGTGCAACTCATCAAGTGACCGTTTTCTGCCCGACGCTCCCACTTTTCGCCAATGCGGTAGTTATTTCCGCTGTCGT
>c10650.graph_c0
GTAGATATGTCGAGTAGTAGCATTGAGAGAGTTTTCTGCTTTGTTCAGGTATTCTGTGAACCAATCAACTTCAAAGAAGCCACCCGGACCTATCACCAACGGCATGGGACTCACATTCTTGTAAACCCGGTTCACAATGTTTCGCAGATTTATGGTGTCTATAGCATATTGATTTGCACCAACTCGTGCACCAACACCACTTCCACACAGCTCATTGCCGAGCTCCCACCCGTCGATGGTGTAATTGTTCTCTGCTGTAAACCGGATGAACGATTCAGCATTGGTGTAATTCCAGGCTCCTATGGCTTCACCGTTAGATTTT
>c10651.graph_c0
ATACTGCAGTATACTGCTACTATATATATTTTTGTTGGTATATAAATATATGTAATAAAAATAAACTTCATCATCGTTTGACTATACTAGAAAGGTCTGTTTGAATTTGAATCGGGGTGAAACTAAAACCAATTACAAGTTGGAATCCGGTAATAGACTAATTTAGATTTCGGATTCGATGAACAGGTTATAAAGTGGAACATCTCTAATGGCAATAATCAGATGAGGGTATATCGTAAAAAATGCCTTCGCATGCGAAGAGACTGCAATACATCAGTCGGTTCGCGACCACAGCTTGTCTACCAGGCTGAAATGTCGAGCAATCACAGCGTAAAACTTGTTTTAGAGCCGCA
>c10656.graph_c0
GCCAAAATAAACGAACTTTAGTTTTTAGCGGTTGCCTTGAATACAATTTCCGCGTATTTGAATAAAATCTAGAATAATAACAATGCTTTACAAAGTGTATGAGGTTTGTCGACACGATTGTGATTAAGCCTATAGGTTGTATTTATTCGCAAACTGAGCGATGAGTTTTGAGGTTACATAATTTAAATGTATACTTTTGCGCCTTATAAACTATAATTTCCTTTTTAAAACGCTCGCTTATATATGAGTATCGTTATATATACATGACAGGCGTAGAAATACTTTGTCTTTGTAAAAATCCATG
>c10677.graph_c0
TGTATAAAAACAAGGCCTCTTTATGCAAATATTTTCATTTGAAAACACCAATTTCAGCCATATGTGAACAATGTAGTTTTGTAAATTAAACAAATAGGACTTATTTGTTACAAAAACGTTTCAAATGGCTGCTCGTATTTGGTTGATTCTATTTTTGTAATTGTCACGATAAATAGACAAGGTTTGAATAAAAGAAAACGCTTGAAAAATCTTCATTGTAAAAGTAAATAAGGCAAGAGACAATTCCAAAACTCAATATTAAAAAATATTGACAGAATTGATAGATTGGCATTCAGTTGCTCACTTGCAATTTTTATTTAATTATATAGTCGTACTGTAAACAGAAGATTAGATCTGATTTTCTTTATTAGTACACCCATGCGAACCCAGGAAAGGCAGTTAATTGTGCTAATATTTATTACTTGTTAATAAATACAGCAACCATAATGAAGTTTACCTATTAAGG
>c10681.graph_c0
CTAGTCTATATATAAAAGGTAATCTCTCAGAACTGATTCATCACTGGCCGACATAAAGTGGATGGAAATTTAAAATTTGAGAAGAATGTTGCCTTTACGTTGTAGGTATTGCTTCTTCCAAATTCAACCCAAAAAGTGATGGAAAAGATTATAATATGGAAAATAATATCTTATGTAGCAGATCTATTTGAAATTTTATACTAATACTTTTTCGACACAAATAATGAAATCCTAATTTGACATTTTCCACATTTCGTCCATTAGAAGTGTGAAATAGGTTAGTAACGTTTATATGAGACACAATATTTCTTATATAAATTTAATAACAATTACTAAAAGGTATAAATTTCACGGTATGCACTAAAGAAACCGCGAGCGGGAAGATTTAGTTCACAACATACAATAATAAAGAAAATATATTGTAGATAGAGATAAAATCACCGAAGTGGTAATTACTTTAATGATTGTTTCATTAGTCACAAGATACAAG
>c10815.graph_c0
GCTCAGTAAGGCTATGTAAGAGATTTGCTAAGAATAAGGTGAATACTTACAAAAACAGGAATTAAGTGAGGAGGGGCCGTTAAATAATACTATAATTCCACTTAATTTATTCAAATTTCTACAAGAACGGTCCCTACTACCTCAAAAATTAAAGCACGTAATGCCTTCAAAATTACACGCGATCTGAACTTTCCTCGCAACATAATTTTCAACACTTTCTATGGGCGAAGGTACGAAGCTAAGTGGTAACGTATAAAGTGGATACGGGAACACCGGCATTGATGCACCATAATGTATTAGATTTCTACTTTCCCTCGGTAATATGATACTTTAGTTGTAGGGCTA
>c10833.graph_c0
ATCTGCCGGGCCCGCTAGTCAGCTATAATTTTCAACCAATTGTGATAGAAATTAGTATGTGTAGAATTGAACACTAAATATTTATACCATATCTGTTTTGCTATAACTCGCATGCTTAAGAAATTATTATAATAAATACTAATAGATACATGTGAAGGTGTGAACACAGGTTTTATTTTTGTATAGACATCTAATTCTTTTGTACGTGTGTATGTGACTGAAGGCCTTCTGGCTGGATAGATTCTGATGAATTTTTTTTGTGTGTTCAGGTGAATTTGAGAATGGTTTAGATTCGCATTAGAACACAGTAGGGAGCAGATCAGGA
>c10835.graph_c0
CGAAGTTGAAATTTTTCCGTTTATAATTTTTTTACATGTAAAAAATTTAAGGATCTTGAAAATAACGTAATATATTGAGATGACTAAAATTGGAATCGGCTCATTTTGTAATGTAAGGACTCACTTCTCACTTACTAGTTGTAATGTTATTCCATTCTGTACAAAATAATTTGTGTCTAACATCTTCATCGATCAAATATTGTTTAAGACGCAATTACTTCATATTGCCTATATTTCAAGGATGTCATCATATCACAACCTGTCACAAACTTTAGTAAGCTATAATTATATAAAAATAATTCATTAAAACATATTGAGAAGGGCTGACGGGCTCACAATTTAACATTATATGTTCCAAAGTAAAAAATATAGTTTCTAAAATCAGCGCCACCTGCCTCCTTCAAATATAACTGAACTAAACCGTAACGACGCGAAGACCTGTGGTCTTACGTTCACAGCAAGATTTCCAAAATACTATTTTAAAAATACCATTTATTAAGGTATATGATGTAAGTTTGATATCCAGCTAAAAACAGAAACAAACACGCGCCAACCGCGCTTTATAAATGTTTTATTATGCACTTGCTTTGTAAACGGATAGCCACCGCTGCTGTTACGATCAACATTCATTCAAATATCAAGTATGTCATCTTTTAAAAATCACTAGCGAACTCTATAGATAAACATTATTTTGTCAGAAACGTTGTCGCGTGTCCGTATAAATACATTGTACAATACAATACATAAATTGTAGTCCGGTG
>c10852.graph_c0
AGCGGTTTCATAATTCTATGATAAGTTCTATATACATCGGAACTAAGCGAACCTGAAGTTTATTCTATTAGATGGCACAAATTGGCAAATTATTCGTACCATGTTAGATATAGATTATCCCGAAACAATATTTATTTCTCCAGGACTCCGAAAGTATTCATTAGTACAGTTCTTCGATCCGAGCGCATTCTCATAACAAATAGTAATATAATATAGACGTAAATATAATATATACGTAGCTTGATATATTTCACAGAAGGGGGTGCTATTTCCTTTGTCATAAATAGTACCTATTTATTATGGGGTAAGTGACCGTATTCTGAACACCGCA
>c109.graph_c0
ATTGCAACCGTATTCGAGAGGTAATGTATCCTTACATTCAAATAACCCAAATGATAAACCAAATATCTATTGGAATAATTATGAAGATTCCAGAGATTTGGAATCAGCTGTTAAAGGTATTAAGAAACTTACAGGAATTGTTAATACGACGCCCTTCCAATCGGTTAACGGCTTTTTGGGTCGGATAAACTATACAGATTGCAATGAATATGATTTAGATAGTGAAGATTATTGGAGTTGTATATGTATAAGTATGACAACAACTATATGGCATCCAGTCGGCACTTGTAAAATGGGTACAGATTCAAATGATGGGGTGGTGAACAGTCGTTTGCAGGTGTACGGTGTTGATAATCTTCGTGTTATAGATGCCAGCGTCATGCGCAGAATAACTAGTGGAAATACCAATGCTCCCAGTATAATGATCGGA
>c10916.graph_c0
GGGGCGTTCGTAAAGCACCTAATAAAACACGAAATTATAAGCAAATATAAATTAGCACTAACAAATTTATATTTTTACTGTACAATTCTCGTTTCTTGTCTATAATGATATTATTGAACATATATCATGCCAGCATTCTAGAAGCTGGACGGTGTATAACCTATCACCACAATCCTGCCTAAAATTTACCATAAATTATCCACGAAACCCCAGGTTATTACAACTAGCTATGGATAACAAATATAATTGGGGCTGAAAACAATTATTACAAGTTTTTGTGAACTAATTGCTAGACAATAGATTTTTTTCAGTACATTCATCTT
>c10922.graph_c0
CGCTTAATACTTTTGTAATTTTGTAGACTTGATAATAATGTGAAAAGTTCTCATCAGCTAGCTAAAGTCTCATCAACATCAGTTCAGTCGTTCCAGAAATTATAGCCGGGACAAACAACAGAGATGTAGCGGGTGAGGAACTAGTCCTCGCCTTACATATGTTCTTGGGGTTCCCGTTTGTGGGACTAAAGTTGTATGTTAGGTCACAATTAGATTATTTGTTACACTATTGTTACAATGATGTGGTTGTGACCTAATGGAGTGCTTGAACACGACCGACAATGCCAGTATTTAATAAATATAATTTTAATCTAGCTTTGTAAATCAACTATGCTGATTCGCACATAATAAGTAG
>c10939.graph_c0
GTGCAATTCAACGGCATTTTGATGAGCCGATTATGGAATTTGCAACTGCAAAATTTGAAAAGTTAAAAGAACTCGGAGTTTCCGAAAAATGCATCATCAATTATTTGTCAAGTTCCTTATATCCACGAAACTTAGAAACTACTGCATTATTAAGAGTATATGATAATTTTGAACAATTTTCTAGACATCTTGTTGAAATAGAAAATAAAATGAAGAGGTTGAGAGAAGAGAGAAGGAAAAATTTGCACTGCACCTTTTGTAAAGGACAAGGACATGATGAAGGGAGATGTTTTAAAAAACATGAAAAGTCTGCATAAGGCTGCTTTGGCGGGGGA
>c10943.graph_c0
GATGATTTTTTTTTCATTCTAATGAAGAAGCATTGAGACTAGGACCATTAGACACGTGATCAAAATGCTGAGAGAGGAAGTGACGACATTGGAACCGCTGGCGTCGGGAGTTGCCAACACAATTTGGGGATCGTAGAGAACGGATGAAGTAAATTTCGGGAATCGGAATACAAACGACTGCTTCCCACCCTTGGTTTCCAGTTTAGGATATCCTGTGGCCATATCTGTGTAGTTTCCACCATCTACGCTAATCTTTCGCGAGAGGAGAACAGAGCTGCCTCCCCCCAACTCAAACTCCTCGCCGTCTGTCCTCTTG
>c10974.graph_c0
AAAAAACGAATTCTCGAAGAGAAAGACACTGAAATCGAAAAATCTATAGAGAGCTCACTCACTAGCAATGGCGTCTCTTCTCGGAAGATCTCCTTCTTCAATCTTGACCTGCCCTCGTATTTCTTCTCCTTCCTCAACATCTTCAATGTCCCATCTCTGCTTCGGACCAGAGAAACTTTCTGGAAGAATCCAATTCAATCCAAAGAAGAACAGATCTCGTTACCATGTCTCTGTTATGAATGTCGCTACAGAGATCAACTCTGTTGAACAAGCAAAGAAGATTGATTCAAAGGAAAGTGCAAGACCTGTTTATCCGTTTGCTGCTATAGTTGGACAAGATGAGATGAAGCTATGCCTTTTGTTAAATGTGATTGACCCGAAGATAGGTG
>c10985.graph_c0
GTGAAGGCAAAGACGGATTGCTTTGGTTCCGTGATCTCGGTAAATATTGCGGCGGAGATTTCTCCATGGCTGTGATTCAAGCCAATCAGGTTCTTGAAGATCAGAGCCAGGTCGAATCCGGTAATTTTGGGACTTTTGTTGGTGTTTACGATGGTCATGGTGGTCCTGAAGCTGCTCGTTATGTCTGTGATCATCTCTTTAACCATTTTCGAGAAATATCAGCGGAAACACAAGGAGTTGTGACGAGAGAGACGATAGAAAGAGCCTTTCATGCGACAGAAGAAGGATTCGCTTCCATTGT
>c10987.graph_c0
GGGTGGCGAATGAGAGATTTGCATCTTTTATTCAGAGCTTTAGGAAGGAAAGCGTACTCCTGAGGCATAAAGATATGCTTATGCGTCACATGAATAGGTGTGAATAAAGCCTTCTTAAAAGCGAGAAGAGCTGACAAACGCCTGGAGGGATTAAGTCTACTGGAACTGAGGTACAAAAATTTGAACACAAATTACTCGTCACCCTTAATAAGAGCAGTGTTGATGTTTGTAGGAAGTAGTTTTTGTAATTACTCACCCTAACTTAAAGAATCTTTCACTGAATCTTCTAACTGGTAGTTATAGGCTGTTTCATTGTAATAACATTTTAC
>c11039.graph_c0
GGTTAAATAAATATAATTTTCTAAATGTGTACATAGTTTTTAACGATAAGGCATATACGTAAATGACTTGTTTAAAAAATATTTATCTTTGTCACGCCTGAAAATGTTGATAAGTCGATAACACGAATTTTTTTTTTACTTTGCACTGAAATAACTTTATACTAACAATCTTTTTAAATGTATATAACATACTAAACTTTTGCTATGGGATTTACTCGCGTAAATTTGATATATGCTTTAGGAAATTGTACTCACCGAAAATATATACTCACATAAACGTGTATGTAACATTTCATGTGTTTCGGTTGAGCAGTTAAGTCGTAAAAGCGTGACAAACAAACCAACAAACTCACA
>c11047.graph_c0
ATTTTCTTGCATGTTCTTACTATTTTTTTTACAAAATTTACTGCGTTCTTCTCTTTTTTCTTTTTCTTCCATTATCTCATGTTGTGAGTTTTCTGTAATTTGAGTTTCCAGTTTATGTTCTAGTTCGTATCTTTGTTTCCCGAACACCGGGCATTCTAATAGAAGATGGATGGCTGTTTGGATTTTGTCTGTGTCGGCTGAGTTATGTTATGAATGGTTTACACTGTACTTAGCTTAAATAATATAAAATTTGATCCGCTCCAGCGTTATCTAGTGCCGATCTAAGTAGAATAGTATAAAAATCCCTACAAAAAATATATTACGGCTGTCAACTTTTTAACGCGTACCAAGTCGCAGGCGTCCGCTAGTTTGTTGTTGAATGGACGTCAATGCATCAAATTATATCTCCCTGACAGTTTCAAGGTCAAATCATTCTCGTTTCATTACTGAAATACATATATTCATGTAATACAATAAATATACATATCTGTGTGTTGGTAGAGGTTTTTAATAAATTTTAATACTCACGTGAAACTAGTTGGTGCCTGCGAATACATTCACATCACAACGACT
>c11114.graph_c0
TATTTCGTGATTCACGCCATAAACCGATATCGTGTATACAGTGGACGAATGAAAAAAAATCAAAACTTGCCGTAGCTTATTGCGAAAGAAAGTGTTCACAGACAGAATCTCCCAAACCAAATTACTGTTATATATGGGATGTGAATCGACAAACTGAACCTGCATGCGAAATTACACCAAAGAATCCTTGCTGGCAATTAGCTTGTTCTCCCGTGGACTCTGACCTACTTATTGCTGGTCTTAGTAATGGTACCGTAAATTTATTCGACGTTCGACGAGGCTCGAACTCTGTTTTTAATAGTTCTGTTTATAATTCACATCGCGGTCCCATCACAGCGCTACTTTACACTCACTCTCGAACACATACAGAATTCTTTACAGGTTCCATCGACGGTCAATGTCTTTGGTGGGATTTACGAAATCTCTCAAAACCGCTAGATTGCCTTATTATGTGTATTCGAATGCCATCCCACGAAGCTCCAAGTTTAAGTAAATCTGAAGGTGTGAGCTCTTTAGAATTTGATCACGG
>c11157.graph_c0
GGAATCGAGCTTCACTGTTAAAGATTTTCCTTCAATCGGCTAAAAATGATACATTTCGTGTTACTAGTCAGTCGACAAGGGAAAGTAAGGCTCACCAAGTGGTATTCGCCGTATACGCAGAAGGAAAGATCTAAGGTCATACGTGAACTCAGTGGAGTGATTCTGAACCGAGGTCCCAAGCTCTGCAATTTTATTGAATGGAGAGGATACAAGGTTGTCTACAAAAGATATGCAAGCTTGTACTTCTGCATGTGCATTGATGAGGCGGATAACGAGTTAGAGGTACTGGAGATAATTCATCACTACGTCGAGATTCTTGACCGCTACTTTGGCAGTGTGTGTGAACTCGATTTGATTTTTAACTTCCACAAGGCATATTACATATTGGATGAGCTCTTGATTGCTGGGGAGCTTCAAGAGTCAAGCAAGAAAACAGTTGCAAGGATAATATCAGCCCAGGATCAATTGGTGGAAGTTGCGAAAGAGGAGGCGAGTTCCATAAGTAATATAATTGCTCAGGCTACCAAGTAGTCCTTTTCTGAACTTTTCTTATGCAGCT
>c11180.graph_c0
GGGTAACGATAACGTGAACGGTTACTCAAACCAAAACGATAACTCAAGAGACGGCAACTACGACCAGAATAGTTACGAAAGCAGCAAATATGAAAACACCAGGTCTGATAGCAGCAGCTATGAAAACGAATCCTCAGATAGAAGTTCTTCGTACCAAAGTAGTGAATCTAACCAGAACAGCAACAGAGGTAACGATAACGTGAACGATTACTCAAACCAAAACGATAACTCAAGAGACGGCAACTACGACCAGAATAGTTACGAAAGCAGCAAATATGAAAACACCAGGTCTGATAGCAGCAGCTATGAAAACGAATCCTCAGATAGAAGTTCTTCGTACCAAAGTAGTGAATCTAACCAGAACAGCAACAG
>c11187.graph_c0
TTTTAACACACCGCGGTCTTCAGTGTACAGGTATCAGGACTGGACGCTGCGCGCCATGTCGCCTGTCAGCAAGCAACACGTCAGCCAGCGCCGGTCTTGGGCCGGCCGAGCAAACGGCGGCCAGGCCATTTACAGGCGGGCCAGGTCGTTCTGCCAGACGGTGGTCGACCAGGGGTCAGCCAGGTGGGTCGACAGGTTCTTAAGGGGGGTGGTGCCGGTGGTGTAAGCCTGGCCGATGAAGCCAGCGAACGCCAGCATGGCCAGACGGCCGTTCTTGATCTCCTTCAGCTTCAGGGACTTGATGTCACCCTTGCTCCAGCCGAAGGGGTCGAAGATGCCGCCGGGGTAGCCCATCTCCGGGTTGGGCACCTTGTTGCCCTTGAAGATGGGGTCCTCGTTGACCGAGCCGAAGTTCTTG
>c112.graph_c0
GTTCCATGATATCATCAGCTGAGATTCTGACTTGCAGCTTGTTCTTGCACTCAGTACAGCTCATCGCACCCGTTCCATCACAAGTTGGGCAGTCTTTTGATGGCAATGGAGCACTATGGTTGAAGGAGGAGGGAAGATGAACTAACTCAGCTCGATTCTCAACTATAGCATCTGCGACACAATCTGCTGTTGGTTTCTCTCCACTTCTCAAGTTGTAATCTTTGATTTGGTAATGAACACTCCCTGTTCCTTTGCACATAGTGCACCGTAATGCCTGCCACCCATTACAAGTTTTGCAATCCCTTTGGCATATGACTTTCTTTCCCAAATCCAATGCA
>c11238.graph_c0
TGGTGTATCACGTCAAAACGGCCTTAGAATATTGTCATTTTCATTTCATGAAAGCAGGACAAGACTTATAGTTGCTTACAGTGTAAAAAATAGTGAAGATGTTAACAATGTAACCAATTTGTATTTTTAAAACTCGAAAAAAAAAACGTTCTTACTTATATTATCGTTTGTTCTAGAATTGTTTTATCTAAAGTTAATCTACATTATCATGAATAAGATAATTCAGGTGTCCGATTCAGCTCTAGATACGCTGTGAAGGTGTCTGTTAGCTGGTCTGGCTACGACATATCTTGTATGCACTTATCGAAACGAAGGAAGGTATCGACCATTATTTTAAAACTAAAATATTGTACAATACAAAAACACAACAAATAAGTACCTATATTAGGAAAAAAGACGATCACAATCTGTAAAATAGAATATATTAAATTTTGTTCTGAGTATTCTTG
>c11247.graph_c0
AAAATAAAAAGAGGAACTTTTAATGGGATCTTAATCTGTCCTGTAGTGATTTTTATTCACAAATTCACGTTGTTTGAATCTAAAATTGGTGGCATCTTGCGTGCTATAATTTGGTTATTTTTTGTACAAAAACGGATAACAAATAACAGAATATGAATTCAGAGAAGTCATAAAAAGTGCCGGAACGTTCTAGCATGAGAGCCACCATATTTATGGAACGCGGAAATTATTACAAGGTACTTTTCCTTTAATGCCATGATTTATATTAACCGGGCAGTTTAAATAATGCCCTGATTAATCGTTCAGTCCATGACACATATAAGGGTGGAATAAATTTCTTTGACGAGCTATGACTAATGCTGTGGGGAATAGACATAAA
>c11302.graph_c0
TTATTCTGAATTAATAAAATTTTCGTCCACGTCATATTTTGTACCGACTATATATTTAATACCTAAGCATAGCGAACGCAGTTTCCTTTGTGGAATAAATGAGGAAGATGAGAGAAGAATCGTTCGAGGATCGACCATGCTCATGTTTACTTAGGGCAGTTGTCGGCAAAGTCGCCATCCAAAAACCAGAAGACAAAAGAGACAAATAAAAATAATACAAACTTGATTTTTCGAAAGAGCCTTTAAAGTTAACTTTTGCTTTTGTACAGATTTTTTTATGGAAACAATGTTATACAATAAGAA
>c11307.graph_c0
AGGCCAATATCGTAGTGTGCGCAACACTCAAAAACTACTGGATATATTTCGATAAAAAATGATAATTTTACTTCTCAAGCAAAGGGCTTAAGAACAAGAAACTCGAGTTTAATTCAATAAATCTTTCCAATTTGCTCTCAATATACGTTAATAGGAAAATTGTGAATAAAATGTTCAACAAAGAAACCATTCAAACAACACGTAAATTAGAGAATCGCTATTATAACATATTGTTCTATTTTATAGACTCTACGTAACCTCTTGAAAATCAAATACCGCAATAAATGTGCTTAATTATTATCCTCACAATTATATTTAATATGTAGGGTGTTGGTCTTTCACTAACACGCGTTTTTTTTTAACAATAG
>c11317.graph_c0
GGGCGGTCGCTTGGAAGTTTCCAACAGTGACTGTGCTAATTGAAACGTAAATAGGTTGAATTTGAAGTTTCACAGGTTGTTAATAACCTCGTTTTGTATCTGGCAATTTTGTTTTGCTCGCTATTTACAGTATCCTCTTCATTCGCAGGTTTATTTTATTAAAAAAAAACAGTTATTGAACCTATAAATTTTGAGTTACCTACTATTACATTTTATTACAATTGTAGTCGTTCGTTTATCCGAGCAATTATTGCCTATGAAAAAAATTATGGTTAAAAAAAGTCGAGGCAGAATTGAATCTTTAAATACATTATAATCTTTATATATAAAATTATCGTGTCACAATGTTAGTTACCAT
>c11327.graph_c0
GGGTAGTTGAGGGACAGAACATAATAGGGAGATCTTCGAAAATATTTACAAAGTGACATTCAGTTTTTTAGACGCCATTTCATTTCATTACATGATCGTACGGTAAAAGGAAGATTTGGTCGAAATTTATTCTTCAGTAAAACAAAGCCGGGCGTGCAGCTGGCATTCTGCTGGGTTCTTCACATTTGATCATAAGACAGTATTTTATTTGCATATGTAAGCATTAAGTGATTTTATTTTTATTATTTTCTCCTTTTATATGATGATATGGTTGTAGTTTAAAATGCGTTCTTAACGGAATGAAGTTAACCAGTGTGTTGAAAT
>c11355.graph_c0
GAGGTTACGAATGTGAAGGGAGGGAGACAACCAAGCGGTTGCAGGGATGGTACTGCAATCTTTTTCACTCCCAAAGCGTGGATCCGTCTCAAATTCACCTCTGTTTGATCCACAACTTGCTTTATGAATGCTGGGAATTCAGAGGCAGGGCGGTTTAGGGCGATGAAATTGGAGTAGTCGTTGCCAGCGACACTGACGAGAGCCACGGATGAAGTAAGCTCGGGAGGATAGTAGATGTCGCCGGTGGTGAGAATGTTCTGGAAGATGTCGATTTGAGTTGTCATGTTAGGCAATGGAGTTTGAGTGTTGAACACTCCTGTTCCTCCGTACGCAAAATTCATTCCGTACTGTAATCGTTTCTTTCCCGCGTAATCTTTCCAAAAGTATGGGATTGGTGATTTTATCCCCACAAATTTAGCTAGAAAATCTGTTGCCACACGGCCATCGGAGAAACGGCCAGCGGGTTTTCCGGGGAAAGTGATACCGTAAGGGAATTTCCAAGAGCTAGAGAAAGCCTTTTTAAT
>c11363.graph_c0
GCTCGCAATTCCTCAACATCATGAATATCTTCAATGGTAAGAGAGAAAGTACGATCACTGCTTCTTCTCCTACTGCTACCTTTCTTCTTCAACGAATGTCTGAGTTTGCTCGAAGCTTTCGCAGCTTTCTTCTTGAAATTGAAATTCCCGATTCTTGTCTTCTTCTCATCCTCTGAAACTTCGAAATCTGATCTCCTTTCTCTTCTCTCATCATTGCTTGAAACTCCTTCAAAACAAGGTCTCGCAAATCGATCAAGAGAGCCTGACATGAGAAATCTTCAGAAGAATCCGAGAATCGGGGAACTCGGAATCGGCGGAGCCGAGAGAGAGAGAGAAGCGATTCTGCAGAGAGGAAAT
>c11372.graph_c0
GTCCTTTCAACATAACTCATCTCATTGCTCCCAGACCCTTTTCCTTTCTCATTCAAAGGATCAGCAAAAGCACCACCGTACTCAATTCTCATCAATCTGACTGCAGATACAGCTCTATGTGGAGAAACTTCCAAATTCAGATTCTGAGATTTCCGCGACGGAGCCACCGGACCTCTTCTATCAGGCGAAAATGGTTTTCGAGTCTTTTGGGTTCGCTTAAACGACCCTGGAGAAGCTTTCTGCGTTTCAGCAGACAGATAAACGCGAAATGAGAGCAATTGCGCCATGGATGCTCCACTGCTGGAGCTAGA
>c11397.graph_c0
GTCACATCATCCACCCCAGAAGTGAGGGCAGCTGGCCCCACTTGGGGCAGAGGCAGGGGCTGGGGCAGGTGGAGGTGCAGGGGGTGGGCCTGACCTGGGACCAAGGGCACAGATCAGGCACGTGAGGAGTCAGGGGCTCCCATACACTGTGGGATCCAGAAAGGGCTGGGCTTTCCTTCCTGAGCTGGGGGATCGGGGGACAGGGTCTGGGCGGTCAGGGGCCAAACCGCAGCAGGGCCGGCAGCAGGCTCAGCAGCAGCCCGGCACCCAGCAGGGTGACGCTTGCCCGCAGCCCGCCATCGGCCGCACTGAAATTGCACAGAAAGCTCTGGCAGCAGCTGATGCCCATGGAAGCCACACCAACATTGACGCCTTCTGGGATGGGGCAGGCCGGGGAACAGGTCTTGCTCAGGCTGTGGCCAAATGTCACGAGATTCCCAATGCCGGCACTAGCAGACACAGTCACGCAGTAGTTGTCCTGGTCGGAGCAGATGGTCGG
>c114.graph_c0
GGTTCTTTGAAGCTATTTAACTGAGCATTCCACGGATATTGGTATATCAATATTAAACAAAAATTTAATATTGAATTATTTTCCAGACGGAAATCAAAATGTAACAAGCATACCACCTCTGCTATTACTGTTTACAAAGGTTTGTCGTAAAATTATCGCTGCGGTAAACGCCTGACTATCCATTAGTTGTTTCATGAATTTATGTCGTAAAATCAATAATAATTCCAAAGACTTATAATGCAACGAGTTGTGTAAATGAATAGTACACAATATTACATAAGAATATACGATATATTACTTATATAAATATTACATAGGGGTATAAGCCGT
>c1142.graph_c0
TACCGCTTTTAACAAGTGCTGCAAGGACCTCGCCAAGTTTCTCTCCTATGAGCCGTACGTAGGTGGTGGAACGGGTGTAAATCCAGCGGATCAGCGAACTGCTGTCAAGAGCCAAGATGTTGTAATGTCCTTTCTTAAGGAAGGCTTCGCTGACACTTTTGTAGTTAATCCCCGTGGGGTCGTCGGTGTAGCCGTGCAGGAAGATGACCAGATTTCTATGCGGATCGTATCCTTGTGTCCGGGGAATTAATTCAGCTGCTGCCGATAAATTGAATGATAGACGGAAAGACTCTGTTATAAAGTCCAGTGAAAGATAATTGAAGTCCGGTTCCCTTCCGCCTTTAACCTGGTCGTATTCGACGCCGGTGATTCTTTTAACAGGACCACAA
>c11427.graph_c0
CTGTTTTCGTATATTAAATAAAATAGCACTTATTACATATTCGTGATTTTTATATTCAGTTCAGATATTATTATAGTATTTATTGTTACTGATTAAAACCTAAATATCGTTTTATTATAAAAATCTACCTTATTTTCTAATTGTAATAAACAAAGAATGTAATAAATGCGCTGAAATTTAAAATATTGACGCGCAATGCTATTAGTTACATCATAGTTTGACGTCATAATATACGTATGAATGAATGTTTTTGTACTAGTTTTTGCCCGCGACATCACTCGCGTCAATGTAGATATCGCGCGGGAACAGTACCGTTTATCTGAATGGAAGGGAAGCTTCGTCTTTTTTCTGTACCCCTAACAACATGTATGCGAAATAGAGTTGTCATTGATTTAGTAGATTTTATTCCAAAGCATTCAAGCAGCGCACACCATCTTATATAATTTTTGCCGACTTTAATTACATTTATTGTGATGAATTATTGTAAATATACATTTAACAAAATAAAAAGTCTATATGAGTG
>c1144.graph_c1
GCGGTTTTGTTTTCATTTTAAGATCTTCCGCTGCGTGTGCTGCGTATATAGGGTAACAATTCCACCCGAACGAAGTTGCGGGCAGAAGCTACTTTAAATATAAAGAGAATCTATAACCTTTAAGGCGATGAAATAGAACTTATTATATTCTCATTTATGTATTTAGTTTACGTATTTTTGTCGGCTTTAATATTAAGTGGTTTAGGCATAGTATCTACTCGAAAACTTGAATAATACGTAACTATTTGTCTGTTTTATAAGTCATACTATATGTTATTATATGATAAGAGAATATGTCTATTCTTTGATACTGTTGGTATGCTGACAAATAAACATCTGGAATAAACCTTTGCCTTTGTAGGGTTAATAAGGGCATAGATAAAGATAATAAGTTAAATACATATATTTATATCATAATATTTACTTGTG
>c11445.graph_c0
GAAGACAATGTTGCCTCAGAAGCAAGCAGAAGAAGCAATTGTCTCGAACATCAGCGAGGCAGACCATGAGGGGAAGGAGGATAAGGAAGAAGATGAGTCGTTTTTTAGCATCAAGAACGCCCTCTGGCACGGTGGCTCCGCTTGGGATGCCTGGTTCAGTTGCGCCTCGAATCAAGTGGCACAAGTTCTGTTGACACTGCCCTACTCCTTCTCTCAGCTGGGCATGCTATCAGGGATCATATTCCAGATATTCTATGGCCTCGTGGGAAGCTGGACAGCCTACCTCATCAGTGTTCTCTACA
>c11491.graph_c0
TTTTTAATTCTTTTTGTTGTTTTAGTTAGTAATATTTTGCTCTCTCTCTATTACTAGTTTCAGTTCATATGAATGTAATCAAAAATTTGTCGTTGCAGTGAGACGTCGTAACGGCCATTAAATTCCTGGAGGTGCAAAGTTACATCCCCTCTAATATTTAAAGATATATCAAATGCTGAAAGAGAAAAAGATACCAAGGGTGGTTGTGAAGACTTACAGAGCTGATAGCAAACTTGCAACTCGTGAGTAGTATCTAGTAAAACGAGCACAGATCATTTGATAATGCTACGTTTTTGTTATAATCATTGTCGAAATAACAGGCTCATTATTG
>c11495.graph_c0
AACTTTCATTTCATAGTTTTAAATCTGAGGTATACTAGTAAATAAATAAATACCGCATAGAACTCAGTAAGTCGTGGCCGTGGAGTGGTTTGAATATCGATTCGATGTCTGTAGGTTCGAATCCCAGTATGTATAAATATTTTTTTCGGAGTCCACGTATATTTAGTAATTTAAATTGGCGACACTATTGGATGACGATGAAGGAAAACTTCGTGAGGGAACCCAAAACTGATAAAAGATTCTTCTAGCACCACCGTATATGTGAAAATATAGAATTCTGAATTTATCGGATTTTGAAATCGCCATTGGCTGGGCTGGCATGGTCATTATACCCATACATTCTTTTCGAGAATTCTACGGCCCTGCAGTGGGTCTTTTACAG
>c1151.graph_c1
GTGCCGCCGATCGGTCCTCGTACTAGCCTTTAATAACTCTATAACTAATCTATATTATTTTATAGAGACAATAACATCCATAAAATATACAACAATTATCGACTACTAGACTTATTTACTGGTTAAAAATGTATTTCTAGTAATTCTATGCCTACACGTCGTCACCACACAAGAATAGATCATAGATGAATAAGCGTTCGGTTTCAAATTATAATACCGTATGAAAGATGAAGTATGAAATAACGAAAATTTACTCCTAGAGAGTCACAGTTTTTTGAAAATAATGATGAAATAACTAAAGTAATTCTACAATATAGTAATAATAAACAGTGTATTAAATATACACCTATACTAGTGATAAAACAAATCCTATATCACATGCCTTTAGCACAG
>c1152.graph_c0
ATCTTTAATTGTCATAGTATAAGTGTAGCTATTTAATTTTTTTCTTTATTACATTTCTTCTTACCTGTACTTTTTCTTTAGCCTTGCTTCATTTAAAATTATCTTTTAATGTTTTTTATCCAATTTCCACGACAACATTATCATATTTTAATAGCTATAGAAACTAGTATAAGCGTATAGCACCAAAATTATGAATCTAAAATGTATTCATTTCTTTATATGGTAGGTCTTTAGGATTCGAAGAGGGTTTAAATCAGCCCTCCCGTACCACTCTGTTCACGTTTAGTTATATTAACTGCGAATGAAGATAGTAAATTGTATGTCTTTTCTAAAGATAAAAAAAAACTGTGAAAAAAAGTTACCTTAG
>c1155.graph_c0
CAGTGTTTAATTTATCGTTATTTATATTATAAACATATTTTATCTTTTAATTTACAATTTAAATTTATCAACTTGATATTTTATAAAGTAAACTATACTGGCTTACTATATACTAAGGGTATAAAAAAAGGGAAAGAAACATGGTTCCAACGAGGAGTCCATAGACCCCTCAAGTTTTTTTTTATATTACCGCCAATATATGTACGTTAGTTTTTATCTTTACTGAACCCTATAGATGATGCTACGAACGGGTTCTAGGTTTATTTTAAAAGATTCTCATATACCAGTTATATGTTATTTAGTATATGTTTATACATATAGTAAAGTGGGTATATGTT
>c11577.graph_c0
TTCCGATCTAAAAGGAGGAAAACGGGTCCGATTCACAAGGTGTTAGAAGGGAACTTGCATTTACGTTCTCATTCCCTGTCAAGCATACTTCTATTTCTTCAGGAGTTCTAATTAAATGGACCAAAGGTTTTGAGATTAGTGAAATGGTTGGGCAAGATATAGCTGAATGTCTACAAGGAGCTCTGAACAGAAGAGGCCTAGATATGCATGTTGCGGCTCTTGTGAATGATACTGTTGGAGCCTTGTCGCTTGGATATTATCACGATCCAGATACGGTTGTTGCGGTTGTATTTGGAACAGGTAGTAATGCATGTTACTTGGAAAGAACCGATGCCATAATCAAGTGTCAGGGTCTGCTTACAACTTCTGGA
>c1158.graph_c0
ATGTAAAACCGGCATTAAACTTAATTACTTTGGATAAAAGTCGGCGCAACTCTGACCAGACACAGAAGTAATTACATTTCTACAGGCTTTGAATTTTAATCGTTTGCAATTCTGCTGAAATGCTGGTTATCGCACACATGATTATATAATTTTAACTATACATAGTTTCTTAAATTCGGTTTCTAAACAATGGACGGTTAATAAATTAATACATTTATTTGAAAAGAACTCGTAAATTCCATTTGTACTATTCAAAAGCTCTTAACGGTTTATGGCTGCATTTTAAATTATTCATATTCCAACGTCAGTTAAATTCGAATTCGGTAGTAACGGGATAAAATATTTAATTATGAAATATATTACATCAAT
>c11601.graph_c0
GAGCCTCTCCGATCGGGATCTATGGAGAGTAAAGCCTCCAAAAGGGAAAGAACATTCGTTGGCAAGTCTTTAAACATCTCTGCTACACGTCTTCCATATGGAAGAGCGGGTCTAAATGCAGCTGAAGGTGGTAGCTTTAGTTTCCTCCAGTAATCTTCTGTCGGTGAACCACATAGCTTGAAGATTTTATGCAGTTGCTCTACCTCGGTTTTCCCGGCCAGGATTGGTTTCCCGGAATATAGTTCACCTAAGATACAGCCTGTGCTCCACAAATCAACCCCAACACCATAATGACAAGCTCCAAGTAGAAGCTCTGGGGGTCGATACCAAAGAGTCACAACACGGCTAGTTAATGGAACGCAGTTCTGTGGATCGAAAAACGTTGCTAACCCAAAATCTGCAATCTTCAAGACTCCATTACTATCAATCAGTAGATTAGAGCCCTTTATATCACGATGCAGAACACCACGACTGTGACAATGATGAAGCCCGCTTAGAAGTTGTTGCATATAACATTTAACCTGAGG
>c11609.graph_c0
GGGTATTGAGGCTGAGTTAGATCTTATTGTGTGTATCACCGAAGGAATCCCTCAACATGACATGGTACGTGTAAAGCATGCTCTTAACAGTCAATCGAAAACTAGGCTGATTGGTCCAAACTGCCCTGGGATTATCAAGCCTGGTGAATGCAAAATTGGAATTATGCCGGGATACATCCACAAGCCTGGGAAGATTGGAATTGTCTCACGATCTGGAACCTTGACATATGAAGCTGTTTTCCAAACAACTGCAGTGGGTCTAGGCCAATCTACTTGTGTAGGAATCGGTGGGGATCCTTTTAACGGGACAAACTTTGTCGACTGCTTGGAGAAATTCTTTGTTGATCCTCAAACAGAAGGTATCGTTCTCATTGGAGAAATCGGAGGCACTGCAGAAGAAGATGCTGCAGCATTGATAAAGGCAAGTG
>c11611.graph_c0
GGAATGGGTTAAACCCCTTGAGCCCTTTTTTTCTTGATATCTCTGACTAGAAGTGGTTCTCTCGCAAAGTCGACTGTACCATATCAGCTATGTTTTGTATCCTAGCTAACCTATCTTTTGGAAATTTTCCATAGACAAAGATGACCGCTAACCACCAGTATTTTTGACATAAAACGAGAAAACACTACATTATTCACCTTATAGCTCACTCACCGAAAAGATTAAAGATGGCTCATTTTATCCTAAGACGAAAACTGAAATAATTAAGCTACTTGCAGTGTAAGTAGTTAAGGGAAATTAAATTATAGACGCGATTAGCATCTTCTACATATTTAC
>c11652.graph_c0
CGCAGTTCTGCCGTAGTATCAGGATCTGTTGCTGTGATCTGATCTGTGATCATCCATCCATCAGGGACATTCTCCTCGACTTGTGGACTGCCACGAGGCAAACGAAGTGTGGGAGGTGTGTTGTTAATATCCATAAGTTGTATAATTAACTGCGAAGTCGCAGTATTGTAAGGCTCTCCGAGGGTATCATCAGCTCTCACCTGCACAAATATTTCATTTTGTCTATGGTAATCGAAGGAATCGTTGGCAGAAACGTAAATATCTCCGGTATCTTTGTCTATGGACAGGAAATTGGCAGCATTTCCCAACAATGTATGCTCTACTCTATCGTCGATATCCCGGTCGTGAG
>c11719.graph_c0
GGTCAGCACCCTGAAGGACATCATCCCCCACCCCAGCTACCTCCAGGAGGGCTCCCAGGGCGACATTGCACTCCTCCAACTCAGCAGACCCATCACCTTCTCCCGCTACATCCGGCCCATCTGCCTCCCTGCAGCCAACGCCTCCTTCCCCAACGGCCTCCACTGCACTGTCACTGGCTGGGGTCATGTGGCCCCCTCAGTGAGCCTCCTGACGCCCAAGCCACTGCAGCAACTCGAGGTGCCTCTGATCAGTCGTGAGACGTGTAACTGCCTGTACAACATCGACGCCAAGCCTGAGGAGCCGCACTTTGTCCAAGAGGACATGGTGTGTGCTGGCTATGTGGAGGGGGGCAAGGACG
>c11745.graph_c0
GTGCGCGAATTCCGAAAAATTCATTCGTACATATGCCGGGATTCGAACCTGTGTACACCGGAATGATATTCCAAAGGTCAAAGCACTGATCACCACCGACTTTGCTTGATTGTCGCCATTATTACATAGTGCATCTGTATCGTGCTTTAGGTCAATTTAAATTGAAGCGATGGTAGCGTGTCCAGACGCCACGTCTATCTCTATGTAGGTTCAAATCTTTATGACGAAATCATAGCTGGTTCTAATGGCCGCATGATTAACAACCCATCACGACTTTATTCGACAGTATTATTATGATTATGTATGAAATATTTACCAA
>c118.graph_c0
TTAGCCAGCTTCTACTGCAAGTCGCGTTAAGGGACTTCGTTCCAAAAATATTTGATATATACATATAGACCAGAGATCTAAAGAATATCTAAATGCTTTAATGTATAGATAACAAATACCAATGTATCATGATATCTATCAGGCGTCTGACATTCATAGCCTACAGTATATTTGTGAGTGAAAACTGTAAATTGCGAATATTTCGAAACAAAAACGTATCAAAGAGCGCGGGAAATAAATACCTACCTAATATAATATGATATAATGATTTTTATTTCTTCGTTTCATGTATAAACTTACATTATGA
>c11810.graph_c0
GCCATGATTAATTTTGATATAAAATTGGAATTAGTTGTTCATAAATAAACTACATCTAACTACCCATTCGAAAGGGATCATTAAACTGTCATTGTCGGGCAGTAAATACGGAAGGGTATTGTAATGTTTCACACTGAGCCGTAGGTAAAGTAGCGTTTGCAGACATTTTGCAGGTAAGGTCATCAACATCATTCAATAATTAATTATAACCATTAAGTACGTAGCAAACACGTTTCGTACGATAACAATTTCGTGAAGAACAAAGAATAGGTATAAATATAATGTTCCCGACATCTATCTAAACAACAACAAAAAACATCTCTCGCCAACTTGCAAGTATTATAAGTAACTAGTTTCCCAGCCCCGTTTTCTTCCTGATATAATAAAGAAGCAAACGAA
>c11820.graph_c0
GTACCTGCCGCGCTTTTAGCAGGGTGGAATGGTATCAATCTATCGTCTTGTCGCCCTAGAGGTCAGCCCTGCTAGAGGTGCTACAGGGCTCTGCCCTAATAGGGAGGCAAACTGAGTACAAACCAGCTGCCTCCTCTTATCGGCCGAACCAGTGCAATGTCTCCTGGTCCATCCCCTCCTGCTCGGTAACGGCGGTGGAAGAGGGCAGACAGTCCGCAATATCCTTGTGCAAGTCCTACGTTGACAGATAGGACCGCTGTGAGGGTCTTCCTCGTAGGCCCTCTCCGCCTCCTTCCGCGATATGACCTCTTCGCAATAATAGACCATCGCATCCCGCGCTGTTTTCACAAGTGATTCCCCACCACCATAGCCAGAATGCAATGATGAGACTCCTATACCAAACAGACACCTACATTTTAAGTGTGATTAA
>c11823.graph_c0
AAGAACAGTATCTAGACTGATCCCCGATAGACTAGCACAAGACTGGACCTGCAAGACCCTTGCAGTTAAATTTAATTTAATATTTATTGATTATATGATAAATAATATATAAATCCCAATCCTTTTCATCAAACAACAAACAATATTAAGTAATAAATTTTTTACAAACAAATGTATTTATTTAGTATAGCTTATTTAGCAAAATTTATAAACTAACAAAGAAGCGAGAGAAAGAATTTGAAAAAACTTGAAACAAATCAATCTTGATAGCTTTTAGAATAAATTTTGGATTTCTTTTAATAGGTCATAGTTACAAGTTATAGGTTAAAGTATCTTTCCTGAACAGTTACCCCATCGCACGGTGGTTTGTCTCTGTAG
>c11848.graph_c0
CATCCTTACAGTTTCAATGAAATATAATTGTACTTACGTTCTGGCATAAAAGTTAATTTACATATAAATTTTTTTTGTGGAATTAGTGTAAAAGCGCTCATAACAGGTACTCTTCAGTACCTCCAGAGCAAACAACTATGATTCCACAGAACTATTGAATGTAAGTAAAGAATCTCCTAATGTAAGTAATACAGTTATCAATTATACAGACTATCAAGTAGTTGCAATGTATCCATAGAGTTGTGTGTACCGCGCGCTCACTACTCTGTTAACTTGAACTACTTTCGCGTGTCTAGATGTATCCATATCGATTATACAGATCGATTATATAGATT
>c1186.graph_c0
GTCGAATAACCGAAAAGTTTGTCCTTTATTAACTTGACATCTGCAGGATCTACTTTCTCTGGTCCAAGAAGCTCCATTAGCTTAAACGAATCTATTTGGAAGCTACTATATGTTGGATCAATAGTTGATGGCATTGAAGTCTTGTCGGAACCGAACTCGTTGCTGCTGCTAGTAGTAGAGCTACTCTTACTTGTCTCTTCATCTTCTTCTTCAAACGTTGCCGTTTTAACAACCGAAGACTTGTGGGTTTCTCCGTTTTCTCCGATACTGTCGTCTCTGTTACTGTTTTCGTCATTGCCTAAACACTTTGCAAT
>c11863.graph_c0
ATCCCCTGTGATGACCTGCTCCATAAACCTCCTGTTCAAGAGGTCTTTTAGAAAAGGAAAATTCTTGGATAACGTTGGTAGTTGAGTCAGCCCTTGAACAAAGGTAACAGGAAAAAGAAACACAAACATGAAGGCAATTGCACCAACAAGGGTTGCTATTCTTCGCATCCAAAGCTGCCGATAAGGTATTCTGAGATTTCTCCAGTGAACATCATGAGGCTCTGGAGCCAAGTCTGCCACCCATAACATAGGATTTGGTGTTTGAAGAACTTCTGAAACAACAAGAGCATCATAACGACTCTTGAAAAACACAAAAGCAACGGGACGTTCTTCCTCTGTCG
>c11866.graph_c0
GGTGGACTCGTTAATAACTGAAGCATGTTAGTAACATAGATGGATTATTTAAATACTTAGAAAAGAAAGGTAAAGGGAAAGCTTAGCGTGCAATCGAGTGCGTAGCTTTTCATCGTCAAGTCACCGCGCAACAAGTGACGTTTCGTATTTCCTTGGTCACAACGTATCTTTCCTTAGAAAAAAATCATTCTTAAAATAAACTTAAACGTTCCATTCTTTGTAATTCTTTAAAATATATTAATATTCTAGTAGGAAACTTACACTTTACATATACCTGTATTTATCTTCGGTTGTCTGAGTAAA
>c11898.graph_c0
ATTCAATTATTATAAATATATGCGAGCCTATTATTGATAATGTAAATGCTTGCCACCGATCTTCTAAAGTTATTTGAAAATCACCTCTGTAATGTTTATTGTAAGAAAAAAGGTTATTTATTAGTTCATAAAAAAAAGTATAAAAGATAAAACACTATTTTGGGTTATAGAAACCGAACTAGTGCATCAGAAGAAGACGGTTTTAAAATGTATATAAGTTTTCTGAAAGTTGACAATAAACTTCGAAATTTATTGAGCATAGAGAGCATAGTATACCAAGCAAAATATTTAAATCCATCATCACTGCTAAAATTAACTTGTAAATTGTACTAAGATGAAAAATAACG
>c11915.graph_c0
ATGTACTCAACTATTGTGAAACCTAAGTTCGAGTCCTCATGAAACCCAGCAGGTGAAAGTAGGATTAGTCGTGAGAGTCTGTGTGGCTTCTCCTTGATTTTTCGAGTAATAACATACATCAGAATTGCAGCACCGCCTAGACTGTGACAGATGGCACAGAGCTTATAAGGCTCCTCCTGGTTGATTTCTTCATCGATATTGGGCTGGCAGAGCTTGAGTTCTGTAGTTTTTATTTCATGAATTTTTTCTATCATCGCTGGGATATCTTCAGTACCGTGCTCGTTAATGGAGTATCGCCAGAACTCTTTTGAGGATATGTTCTTGTTCACATGATCTCTTGAAACTAAACCCCGAAAGTTACCCAGAAAAACATCATAGCCTTGGTCATACGCAGCAAAAGCCGGAGATCCAACAACCCCATTAGATACCCATCCCATTGAAGAATCCAAAACCCCATGCTGCAAAAAAACAGCTTTCCTTGCATCACGTCTTGGTATCCTTTCCAAGACAAGAACATATCCGTCAGATGTAATAACACGAATAGCTTCGTAAGGATACCCCAACTCTGTTATGACATCTTGACACGTTCGAGTATCAGTGTTCATAGAGTTGTATAAACGTGTGGGACTTTCAACGGGCCTTTCCGTGGGGGATGGATCTGTA
>c11934.graph_c0
GGACTTCGCCGCTGGGCAGGTGGGCGTGATGCAGCAGAATCTGATTGACCTCCAACCGCAGCTAGTGGATACGTCAGACAAAACTGAAAAACTTATGATTAAGATTGAACAGGATACTGTTGTTGTGGAAAAGCAGAAAGAGATAGTAGGTGCAGACGAAGCGCTCGCCAATGAAGCGGCAGCAGCAGCTCAAGCCATCAAAGACGATTGTGAATCGGACCTTGCTGAAGCTGTTCCTGCTCTCGAAGCGGCTCTGGATGCCCTCAACACTCTTAAACCTGCAGATATTACTCTTGTGAAGAGCATGAAGAATCCTCCGGCAGGAGTGAAGCTGGTTATGGAAGCTGTTTGTGTTATGAAAGGAATTAAAGGGGATAGAAAAATGGATGCAAATGGAAAGGTATATG
>c11994.graph_c0
GGGTCCTCCTCTGGCTTTAGCATATTTACAGTCTTACATTGCCACTTAGCACCAAGTGTGCTTGTGTAAACACTAAGAAGTTCATAAACAATCAAATATCACAACATATTCCTAGTAGGGCAGATAAAAACTAAAGAAATATTAAGCCCTTAAAACCAAAGGATATGCACTCAGGTGTAAGTACCTGGTTTACTTTTCTTTCTTTTGAAATAATTTATTCGAATATTAAAGACTATGGCATACTTAGAAAAAGAGATTTAGCATATTTACTGTCATTCACATACCATGGCCCAGCACCATATGGTCAAAGATTGGCCACTAGAGAATAGGTTGAGTTTTAAAAATAGAAGAGAATTTTTTTTTGGCA
>c11996.graph_c0
TCTCTCTAGATGAGAGTCCGATAAGCGTTCCCAAGCCAAAACATTCTGGTTCTGGAAATCGGAAGTCTTCATCTGCTAAGAAGGAGGTGGCAAAAAATCACCCTGTGGAAGAGCCCAAAAGTCCTGCTCCATCAAATTCCAAGTCGGAACAACAGCATTTGAAGTCAACTAAAGCAAGTAAGGCACCAAAACAAAAGCTGGTTCCTCAACACATGAAAAACAGCATAGAACATCGAGGTCAAAATGCATCTAAACCGCTTTATCCGCCAAGTGGAAAATCTGTTATTGTCGTTGAGTCAATGACAAAAGCAAAGATTATTCAGGG
>c11998.graph_c0
GAAGACGAAAAGGTTTTCGACACTACTCGCGAAGACAATCTTGTTTTCTCCTTTGAGTTAGGAACAGGCAGTGTTATCCGTTCTTGGGACATTGCTCTTAAAACCATGAAGGTTGGAGAAGTTGCAAAAATTACATGTAAGCCAGAATATGCTTACGGAAGAGCCGGGTCTCCTCCCGACATCCCACCTGATGCAACTTTGATTTTCGAGGTGGAATTGGTTGCTTGTAGACCGAGGAAAGGTGCTAGTGTTGGAAGTGTTTCTGAAGAGAGAGCCAGGCTAGAAGATCTGAAGAAGCAGAGAGAGATTGCTGCAGCTGCGAAAGAGGATGATAAGAAAAAGAGAGAAGAAGCAAAAGCTGCTGC
>c12023.graph_c0
GGATGATGAAGTAGATAGCATGGAAGATGATGAGGGAGAGAGTGAGGAAGACGATGAAGGAGATACCGAGGAAGATGATGAAGGAGATAGCGAGGAAGATGATGAAGGAGAGAACAAGGAAGACGAGGATGGAGAAAGCGAGGACTTTGAAGATGGAAATGATAAAGAGAGTGAGAGTGGCGATGAAGGTAATGATGACAATAAAGATGCTCAGATGGAAGAGCTTGAGAAAGAGGTCAAGGAGCTTCGTTCACAAGAGCAGGATATATTGAAGAACTTGAAGCGTGATAAGGGTGAAGATGCTGTTAAAGGTCAAGCGGTG
>c12064.graph_c0
ATTAAAATGACGATATGTATAAGAAGTCTTTTCGAACGAGAATAGTTAATAATTGGGAAAGATTTCCAAAATTAAAAAAAAACGTTGTATAATAATTGGAGAGAATATTTTGATGGAAGAAGTAATGAAAGATACCCTTTTCCTTTCCTAGTATAAAACAATACAGTGTCAGCATCTTCGTATACCGTGGTTTAATGAATGCAACCTAAAGGTAGTTTTAAGACTCCGTTCGGGGCTCTATACATCGTAATGTTTTTCGTACTTAATGAGGAAAGTGGAATCTCCCAGCTGCGATGTATGTAGTAAAATTGATGATGTGCATCACTTG
>c12068.graph_c0
GGTCTTTGTAATTTTTCTTAACTTCTTTATTTTTGTAATTTCTTTATAATTGTATTTTTTCTTCATTTCCAGAAACTTCTACAAACAACTCTATAGCAACTCTGAAAACAAAAACCTCAGAGATATGAAAATTTTAACCATACAGAGCCAAAACGAAAAGATTGAACAATCTAAAGTGATTGATATACTACAAAAGCTAAAGAAACTGAAAGAGGATAAAACAGCCCTAGCAAGGATGGAATATCAAACTAGCCAATCAAACGAGGCCATCGAACTAGCCAACGGCGTGATTCTTAAACCCCTAACTATATTGTTTAGTAAAATACTCGATGACGAAGAGGTTTTAGAGCAAATA
>c1207.graph_c0
TAACTGTTTGTATGCGAAAAATTGATTCAAAAATCGTAGGAAGTGTAAAAATTTACTGAAAAATCTCCATATAAAAAGCGAGTAATTGATTAATACAGAAGACAATAGATCTTCAAAAATACTTACAGAATTTAAATATTTATGTTCAATAGCTCAGTTGCATTTTATGTTATCACATGGTCATATTCGTAAATGGAAGATTTGATTTCATTTTCTTTAATGTACTAAGCAAGGCCGAGCAGCCAGTTATTTTAAAAATTTGTTAACTTGTACTTGGGCAATGATTTAATTTCTTAATAAAGAAACTTTTAAAATATTGTTAGCACACATATTATATACAACCAGGCAAAGATATTTTTCAGTCATTCCATTAAAGTAGCACATTATTACAAGAAAATGGTAAACATTACTGTTAATTAACGAA
>c12159.graph_c0
CGTGGGATAACAAAACAGAATAAATCATAACATCGTTTCGTAAAAAATCAGACATATTGGTATAGTGATAACAAGGGGGACCCAGATATCGTATCTGAACGGAACTTAGCGAAATATCGGTTGTCGAACCGACGATGTATACGAAGTCGCTCAAGTGTTATGTAGGCGGAATTTTTATAATAACTAACCCTCATACTGATTTGCAAAAGTAAGTAAAGTTCTCATCCAATCATATGATTAGATACTAAGTGTAAACTTAAGTATAGACAAAATTGTTACAAAATGTATTTCAAGTTCTATTAACACTGTTTAAAAAAATATAAACTAAACCTTAACGTAAACTTAACTATATA
>c12193.graph_c0
TTTGTTATGTAGTCTACTATTTTATTACTGTATTGCAATAAACGTAAATGGTCTTTCTCGCTGTCTTTTCTTTAGTCGCCTGTCATTATAAATGTTACATTCGAAACATAAGTTTTTGTTTTAAACCTTTTATTCTCATCAGTGTACAGTTATAACTTTGGAAATATGAGTCCATCAGTCAATATCTACTTATGTAATACGGGATTTGCTATTATTCAACCATGTTACATCTTTAATGTAAGCAATAGCATAAACAGCCCTTTATGGGCAAAGGGCTCTTTTCAGAAAGATGTATGGTTTTTAAACAACACACTTGCGAAGGCCGCAGCGGCGGTTTTAAATATCAAGATGCGTAGTTCTGTTCTTCTCCTAAGGGTAGCAGTGCGAGAATACTTATGTCCTGG
>c12202.graph_c0
ATTGAATATGCTAGGAAATACCTAACTGAACTCAAAGAGATCATAAAAGAATGGGAGACGAACAAAACTTGGCTTCCAAAAGAAAAAATCGACGAGGTCTCAAAGGAAGCAGAGAAAGTAAAAAGCTGGTTAGATAAGAATGTGGCTGAGCAAGAAAAGACTTCTCTGTGGAGCAAACCGGTGTTCACGTCCACTGAAGTGTACGCTAAAGTATTTACTCTACAAGACAAGGTCACAAAGGTGAATAAGATCCCAAAGCCAAAGCCAAAGATAGAGAAAGTAACCAAGACGGAGAACACAACAAAGGAGGAGGAACAATCAAAATCCTCTGATGAAGCTGCCAAAGA
>c12216.graph_c0
CTATAGTGAATATTTCAAGTAAGTCAGTACCTACTTGAAGTACAAATGAGGGTGTCACACTTGTACTTACTACTCAGCCACTAATGAGATTTTACATATATATTGCAGGGATATAGAAAAGGGCGGACGCTATCTTTCATTCAGAAACTATGTACTTTTTTCGAGATTAGAGGAATTATACATTTACCTGAACAATACCTAGTTTATGATAAACGAAAAACTTACAACAACAGGATTTTCATAAAACCTGAATACCGATTCAAAGCAAGAGTATAGATTTGAATGTACTTTCGTACATTATCGA
>c12239.graph_c0
TTATTTGAATCTTAGAATTGAAAAAACGATTTCTTATTTTTGTTTGATTTAAATTACTCACGCAGTCCGGTTAAGCGGGGTGGACATTATGTCGTCTCTAAATTCTATATTTAAGCTTATTCCAAAAAATTAATACAATCATAAAAATGTAATAGTCTTATTAGGTATTAAGAAAATTATGAGCTTCGTTTAGACTTACTGGCTTTTGTGACAAAGTGTTGTGTACTTTAACGAAATAGAAAACATAAACAACGCCATTTGAACTATCATAATATATTATAGTTTGATATGTCCACTCTTAAAATGTTCGGTTTCCACATATAAAAACTAAACGCACATTATACTGGCGACAGG
>c1224.graph_c0
GCATCCTTCATTCTCTCTTGCTTGCTAATCTCTGAGTTCTTTGGCTCTCCCCAGTAGTCATACTGATATAATGCACTTGTTGGATCGTACTGGTCTTTCCCAAAGAAGCTTCCTGGCTTGTACCTCCCTGGTTCCTCCAATGGTAAACCAAGTGCTTGCCGAGAGCTGATATCTCTGAGCAATGCTTCTCTTTCCTCCAAAGATCGGCGCCAGTGTAAGAAATCATACTCGTCCATCTCTATATTTCGTCTGAGCTTGTCAATTTTGTATCCTTCTCCTCTTGCTTTAGCTTCCATCATTAGTTTATTG
>c1224.graph_c1
GATGCACACAACAAATCCATTGTTGGGAAAGGCAATGTGTGGTATGACATGTCTTACGATGATGCGATTAAGCAGACAATAGAGAAAAGAAAAGAAGGGTCTACCTTGGCGAGTCAAGAAGAAGAAACAGAGTCAGAGGAAGAAGAAGAGGATGACGATGATTTTGACGATTTTGACTATAGCATTCTGAGTGATGAGAGCAGTATCGGTTACTCGGAACAGCAACCTCTTGTTAACGGTACTCAAGTCTTGACAGACTGATGTTTAAAAGGAAAGTAAAAATAAGAAATTGTCGAGGTTGATTTATTTGAATTTTTGTCTGTTAGGTTTGATCTATTTGATAGTTTTTTTTTTTCATTTCTTCTTATCCCGG
>c12244.graph_c0
TCGTATTGTGTCTGGAATCATCACACCTATCCATGAGCAGTGGGAAAAGGCTAATGTAAGCAGTCCCCACCGGGAGTTCCCCCCTGCTACCGCCAGAGAGGTGGACCCACTCCGGATTCCTCCACACCACCCACACACCAGTCGGCAGCCTCCCTGGTGTGATCCCCTGGGCCCGTTTGTTGTCGGGGGAGAAGACTTAGACCCTTTTGGGCCTCGGAGAGGTGGCATGATTGTGGATCCCCTGAGATCTGGCTTCCCAAGAGCACTTATTGACCCTTCCTCAGGCCTCCCGAACCGACTTCCTCCAGGCGCTGTGCCCCCAGGAGCTCGCTTTGACCCCTTTGGACCCATTGGGACCAGCCCACCCGGACCTAACCCAGACCATCTCCCCCCGCCGGGCTACGATGACATGTACCTGTGAAGG
>c1226.graph_c0
GGCCTTCGAGGCGCAGCAAGATACTTGGTTAATATCTAATCGCCGCTCACACTGGGAATCTATAGTATATCTGACTCGCAAGACTCGGTGTGGTACTAAAAAAACAGTTAACCGTCCCTAAGATACGTTCTTATTTTTATTTCATCGAAATCCTAATGCATTTCGACGATGAAATTAACCGAATAAATAAATCATTTGCTGTCGAATTTTAAATGCAGGGAAATTATTCCCAAAAGTCACATTTGTTAGCGAGTCTCACCTAACGGATTCCGCCAATTTTCAGTAAATAACTAATTTTATCTTAAATCATAAAGCACAATACAATCCAAAGGGC
>c12280.graph_c0
TTAGAGAAGACTCCGATTCGTGGCAGAGGAAGAGAGCGAGACTGTCTTTAGGCTCACCCATTTAACGGCGGCGATGATGATGAAGACGACGGCGGCGGCGGAGATAGAAGTGTTCTTCTTCTTCTGCTTCTGCTTCGGTGGTGTGTCCGTACACATCAAAAGGGGAATTATAAAGAATTTGTGAGAAGAGTGTTTTTTTTTTAATTTATGAGATGAGAGGCAAAGTTATCGCAGTGAATATAGGGGAAGAATAAGAAGGGAAGCTAAATCATCGTATTTGATTTTTCTTCCATTACTCGATTTGGG
>c12290.graph_c0
GGTGCTTGATCTGGAAATTTGTAATGCAGTGCAATAAATTATTGAGGATATAATTTACTGTTGATTATTCATTGTCCTTTATAATTAACTTTTTAATTAACATTGTGCAAACTTAACAACATAATGTATAAACCGGTAGGTGTAAAAGAGAGAGCTATTCAGAGACAGCTGTAATGCAACTTGCAATAAAAATTTCGATGCAATGGACAAAAAGTTTCACTTTAATAATGCAACAGTGTAATTCATTATTGATGGAGATTTTACTGCTATTTATAATGTTTCTCTATTCAATGTGATCTCCAGGCAGGTCTCTGCAAGGTATAGACTACTTCACTTTTTGTGAAGTCTACAGTAATATCATATTAGCAAACCTCGATTATCAAAAAATCAGTATTTT
>c12297.graph_c0
CTGGCGTGTTGAAGGAGTACAGCGTGGTTGGGCGCAAGCTCCCATCTGACGTGGTCCCCAATCCACAGCTTTACAAGATGAGGATCTTTGCTCCTGATATTGTCACAGCAAAATCTCGCTTCTGGTACTTCCTGTCTAAGCTTAAGAAGGTGAAGAAGTCCAGTGGTGAGATTGTACAAATTAGATTGGTCCGTGAGCGCAAGCCAGCAGTCATCAAGAACTTCGGCATCTGGCTGCGTTATGATTCCTGCTCTGGCACCCACAACATGTACAGAGAATACCGTGACCTGACAGTCGCTGGCGCCGTTACTCACTGCTACCGTGACATGGCTTCCCGCCACCGTGCTCGTGCTCACTCCATTCAGATCATGAGAGTCGAAG
>c12317.graph_c0
AGTCGGCGCGGTCTGGCTTGGCGGCGGCGGCGGGGTGCGGACTGCGGCCCGGACTCGTGGGGGACAACACGGACCCGCGCCCATGCGACCGACCACGAGTGGGCGGCACGGGAAGTCGACAATGAGCAACGGCTCGCGTGACTCGGGGACACCACTACCCACCACATTATATAATTTATTCATTATCGGACAGCAGGGAGGAAACGCTCCGCAGTGAGACGCGCAGGAAATATTAACTTAACTCCGAGTGTCGAGACAATGGGAATACAACTCCCTGCGGATAACGTATTATGAATTAAACAATTTCCTGAGGA
>c12396.graph_c0
GTCGCGTCTCGCGCGGTACAGCGCCCGCGCGCGCTGCAGGTGCGCCCACAGCGCTGCACGGTCCTTCAGCAGCTTCAGGAGGATTGCCTGTGCGAGCGTGCAGGAGTGCAGCAGCTCGGCTTGCGAGTGCAGCTGCAGGCGCTGCAGCAGCGGCGCGGGCGCGGTGAGCCAGCCCCCGCGCAGCCCCGCGGACACCACCTTCGACACCGAGTCCAGCCGCAGCACGCGCCCCGCCGCGTCCAGCGACAGGAACGAGCCCCCCGCACCGCTCGCCTCCTCATCATAATTGAGGAACATGTAGGGGTCGTCTTCAACGATGAGGAAATCGTATCTGCAGGCCAGCTCGTAGATCTTCCTCTTCCTGGTCTCGGGCAGCACGGTGCCAGTGGGGTTGTTCCCCGTCGGGATGATGTACATCATCTTCGGCATCTTCAGTCCTCGGTTCAA
>c12431.graph_c0
AATAATACATTTAAAATTAACATAAATTTACTTATTTGAGTTTGATTTTAATGTCGTTGTTTGGTCATTAATTTTTCTTTGTAATTCACAATTCTAAGTTATTTTACTGTATAATCTGTGAACTTTGTAACGTTTTGTGTGCAAATAAATGAAATCTAAATAATAAACGACGAATCTTTTACAATGTTAATAAAGTAGCAAGCCACCATTTTGCTATAATATGCCTTGACCACATTCAATATATCGCATGATAACTTAGCCTATAATATGATAACAACATTAAATTGAACTGTAAACACGTAATCCATATATGTATATTGAAAATATAGATCCTTTGATGCTCAATCAAGAATAAACTGCTAAACGTGTCGG
>c12458.graph_c0
GGAGCTTCAGGAACAAAAGTCGTTTTATATGTTGTAACAACTGGTAGAGAAGTGGTTACTGCAAATGGAGTAGCTGTTGTAGGAACACCAGATGAAGTAGGAGTTGTTACAAAACTATATCCATCAAGATTATTTCCATCTGTTCCTATGTGACTTACTGATACTGCTGGCTGTGATACTAAAGACACATGTCCAGGATGTAAAGTTTTATGTCCGTAAGAAATATGACTATTAAGTCCTTGATAATTATTTTGGTCATTATATTCTGCGTCAACTAATGTTGTTTTACCAACCAATTCGACGTTTACTGCTCCTGCAGTAAGAGTGTGAGATCCACCTGAATAAGCTTCAGAGTTGGTCAAGTATTTACCAGCATTAGCTTCACTGTAACTGCCGTGATATTGCGATGAGATACCTCCTTTGCCGGTTTCTTCGTTGGTACTTCCTATATGACCATCAGTTCTATAAACTCCCCCTTCGTATCTGCCGGAGTCATCGTGGTTATAATACCCTGAAGAATCAGCTCTATATGCTCCTGAATAATCGACTTTATATCCACC
>c12465.graph_c0
CCGGCAAATTGCATCTGATCTGCTTCAACAGAAGACGGATTTGGTACCTCCAATGTCAACTTCTTCTCAGCTACAGACTTGAGTCTCCGCCTCTCTGCTCTTGACCCAATCACCTGTCCCAAAACTGATGCTGCTATGGTGAATACCATAGCTGTTTTAGGCATCAACACTGACTTTCTCAGTATTCCTATGAATGGAACCGCTGCGTGAAGAGCTATAAACCAAGATGCCGAAAACTTTTCAGTGTGCTCTCTCCAGACCCCTAAAGGCACATTTAACGCCATGCCCAGCATCCCGATCACTAGTACTTTAGCTGGTAAAGGTTGTGGACGGAGGTTCTTGGCGAAAGGTGTTTTTGATATCGCTGCTCGAGCTGTGACTATTGCTTGAGGGCATTTAAATTTCATGCCTGGAGGGGGTTGCAGGATCTTTGCCACAAGTGGTGCCACACCACTTACAGCTCGATATGATTTTGCTATTGGGCAGTTTCCTGTTTTAAGCCATTCGTCGCCCATGGCTTCGTGGTTTCCTCCCTTATTTTTGGATGAATCTGACTTCTTCTTTTGATTTTTAAACATGTCAGAAAATGCATCAAATCCAAAAGGCCCTCCAGATCCAAAGGATGAGAGACTAATAGTGGCCGCCTTAGCAGCAAGTGGATGGAATACAGGCACAGGCTTCTGGGCTTCAGTTCGAGCGGTGTCAGAGAGAGGGACAACTCCATCTTGGCCATGGAAAAGCCTAAACGCCGTATCAAAATTGGGACCATCTTCAAATATAGGTCCTTTCCCAGCTCTTGCAGGGATGGGAAAAGGCAAGGATGAAGAGAAAGAGAGGTTAGTGGGCTCATTGATGTTCCTCAAGAACGGGCATCGGAGAATGTTCAACTGAGAAGCCATGGGATTTTCTCCAGTACAATTATCCATTCTTGTTGAGCTGAAAAAAGGACAAGAATGGATAAGAGATGAGAGGCGTGTGTGAGGAACGATACAATTCCTTTCGGAGATGAAATGAAATATGCTTAAAGGAGAAAAGGTGGATGAGAGGTTAGG
>c12468.graph_c0
GGGCTTTTAACAATTATTATGCTATGTATCACGTTTATTAACCTGTAAGGTATGGGTGTAAATACTGTAAAATTAATCTAAAAATACAATCATAAATTTATCCTTATTCCACTTAAGTAAGATTCCATTCTCCTCTATCATCTGCCAACTTAGCATCCACAACGTCCGTACCCTTATCATTCTTCACATAATATATCCACACTCTCTCAGGTCTTCCTCTAGTACTGTATCTATCCATTTTCATATGTTAGTATGAAAGTAAGTAGTAGTAAGCAGAAGAAAAATAATCTTCTAACTATATAAATTTAATTCCTCTTTCCGACTTGCCCGTACCACACTAATAAATTAATTTGAAGTGCTAATTCCTAATGTTACCCATTTTAGTTATACTAAACATTTGATTTAATATTTACATATCTGCCATTTTTAATCTTCTATCATCTCCCTATTTTCTGATCCAGAACTTAGATCCATGTACCACCCCAATTCTATAAGAATTTTACAGGT
>c12470.graph_c0
TGATATTTTGTTTGGACAAAATGGCTGAGAAGAAAGGAATCACAGCTGAGGATGTCAATGCCGCCTTCAGGAAGGCAGCTGACGGACCATTGAAGGGCATTCTGGCTGTCTGTGACGTCCCCCTCGTCTCAGTAGACTTCAAGTGCTCTGACGTTTCTTCCACCATTGATGCATCACTCACCATGGTCATGGGAGATGATATGGTCAAGGTGGTCGCCTGGTACGACAATGAATGGGGTTACAGCCAACGGGTGGTCGATTTGGCTCATCTGGTGGCAGCCAAGTGGCCAGGTTTTGCTGCAGAAGGAA
>c12555.graph_c0
AAAGGAACCTCGAACTCAGAGAAATTGAGAGAAGAGAGAAGAATCATGGGACAAGGACCATCGGGAGGATTGAATCGGCAAGGAGATCGGAAACCTGATGGTGGAGATAAGAAAGAGAAGAAGTTTGAGCCGGCGGCACCACCGGCTCGTGTAGGGAGGAAGCAAAGGAAGCAGAAAGGGCCAGAGGCGGCGGCGAGACTTCCGACGGTGACTCCGTCTACTAAGTGTAAGCTCCGGTTACTGAAATTGGAACGGATCAAGGATTATTTGTTGATGGAGGAAGAGTTTGTGGCGAATCAAGAGAGGTTGAAACCTCAGGAAGAGAAAGCTGAGGAAGATAGATCTAAGGTTGATGATCTTCGTGGTACACCTATGAGTGTTGGGAATTTGGAA
>c12557.graph_c0
AATAAATATGAAGATTTAGAAGAAAAGATTGGGGAATATGAAAAAGAAATTAAAAAAAATAAAGAAAAAATGAAAAAAATAAAAAATGATGGTAGTAAGGATAGTAGTGATGTAGTTAATAAGGAAGCTATGGTTAATAATGGAGATAAGGGTTATAATAAGGATATGATTATTAAGGGGGCAAGTAAGTCCAAATCTAAGGGTAAATTACCCCCTTTCACATCCCATAATGATACCACTACTACCAACCTTAATAATACCACTACTGCTTCTATAAAAGATTACTTACTTAAAATAAAAAATCTAGAATCCTTTTTATCCCAATACTCCCCTAAGGA
>c12566.graph_c0
GCCATGACTTATATACTCGTTTATTATAAGAGATAACCTTTAATCCTTCATTACTACGTAAATAAATGATTGATCTCCCTTTTAATTTACACAACATTATTCGGTTTAAGGGACAAATAAACAAATTTGACGTTGGATTTTTTTGTTCAGGTATATATTAAATGTTAATCCATAGTCACCTGTTATTAAGTGACAAGGAATAATATTGGCTCAACATAGTATGAAGGTAATTATAGAAATGAAACTGACTCTGAAATACACCGATATAATGAGGACTACTTGAGAAGTACAATACTTGGTAATTCGCAGTTGTTCGCAGCATATCATAGCAGAGTTGTTCGCAGCTTATTATGATTTAAA
>c12585.graph_c0
ATTGTTTAGTTGAATTAGGTTATATGTTTGTTATTATAATTGTCATGGTTAAATAATCTCATATTTTCTATTTTTATAAATAAAAATAAACTACAATACAATAATTTGTTTTATTGGAATATCAGGAATTATGAAGGAGTCTTAACACAGGTTTACAGGGTGTACGAGAAACTCAATTCTTGACTTCATAGGTCACCATTTTTTTAGAAAACTACTCCAACTGCTATGAAGGTATTCTATATATGGCAAATGTTACATTGTAGTTAAGTTACATTATGTATTAAGGTATATAAAATAAAAGGATGTTAATGTATTACTAATATATGTGTATATATAGTGTCTGTGCCTCTGCTGACCATCAATGTGGCTGACAAACAAATTACCACTTATCATTAATTATAAAATTTTATTGTTAGACAGCCGACACGTGCCCACTTCGTTGGGCGGTAA
>c12587.graph_c0
TGGATGGACCAATTTGCTCTGTCGTTGGACCCCATGACTGCTATGTCTTTCCATGATGAAACTCTTCCAGCTGATGGAGCCAAGGTTGCACACTTTTGCTCCATGTGTGGACCAAAATTCTGCTCTATGAAGATAACAGAAGACATCCGAAAGTATGCAGAGGAGAATGGTTATGGCAGTGCTGAAGAAGCAATCAGACAAGGAATGGATGCTATGAGTGAAGAATTCAACATCGCAAAGAAAACCATTAGCGGAGAACAGCACGGTGAAGTAGGTGGAGAAATATATTTGCCAGAGAGCTATGTCAAAGCTGCTCAGAAATAAAAGGCAAATGTTTTAAACAAGACCTTGCTTACCCAACTCTTGGTGCCTGTTGGACTATACCTGGATAAAGGCACAAACTGTTGGTAA
>c12591.graph_c0
GGCCAGCAGAGCTCTCTCCTCCTCCAGCAGGCGCCATGCAAGGGCAGGCTAAAAGACCTCCAGTGCATCAACATCCATCTAGCAGAGAGAAAAGGGGCACTGAAGCAGCTATGTCTGCCAGGGGCTAGGGGCTCCCTTGCAGACAGCAATGCTACAATAAAGGACACAGAAATGGGGGAGGTGGGGGAGCCCTATTTTTATAACAAAGTCAAACAGATCTGTGCGTTCATTCCCCCAGACACACAAGTAGAAAAAAACCAATGCTGTGGTTTCTGCCAAGATGGAATATTCCTCCTCCTAGTTCCACACATGGCGTTTGCAATGCTCGACAGCATTGCACTGGGCTGCTGTCTCTGTGTTCTGGCACCAGTAGCTTGGGCCCCATATACACTTCTCAGTTCCCAACAAGGGCTTATGGGCCGAGGGGCAGGCTCCAATTTTCAAGCACACGAAGGAAGGATCCATCACCTCCACCAGGATCTCGATCAGCACGGGCTCGTACTCTGCCACAAACTGATCACACTGCTTCTGGTAAGGGTCTGGCAGGAAGCTGCAGCCTTT
>c12596.graph_c0
GCATAACATCTCCCCCTCAGAACGGATTTTTACAGAATCGGCGTATGAATAATACAGTACCTATTATGACTGCAGCAGCAAGTATAACGTAGACTGGTATTGTGGTGTGATTAACAACATTGGATGAAGTCTGGTCCAGGTGTATCAATGGCTGCAGCATTGACTTGTCTTGGTATTTGTGTAGATCCCTGAGTTTGACAGAGTTTAGTTTTAGCTGTGGTAATGGTAATGTATATGGAGCTTCAGATTTCATCGAAATTTTCATGATTTTCAGAGATTGTCCTTCAATTCTATCATAGCTATTTATTATACTGATTTCTTCTGTATTCAGGGAATAGCTGATTGGAATAGTAATAAGAAAATGTTTATCGGGTGAGGAAAGGAAATAACGTAGTGCCTTTCTTCAAGCTGGTCCATAGCTTCTTTAGATAGTTTGATCAAATTCAAATTAATTTAAAACAACCCAAG
>c12598.graph_c0
GATCTTCTAAATTCTAAACATGTAAACATATTGAAACGTATGTGAGTTTATGGCTAAGCTAAGTGTAGGCACTGTTTATGCGGCGATGTTAACATTGAAGGTTGTCCAAGATGCCCGATAGGCGTCGGTGAATCAGTAGACGCCCTGCAGACAGCCATTGTGACGTTTTGTCCCGATAAATAAACTCTATATGCACGCACCGGTCACAAGCTCGACACAATACGCCAATTCAACGTTGAATTGGCACGTTTGTAGGCGATTAATAAGGCCTTATATAGGTCAAAGCTATATATGTATGAATTTAT
>c1264.graph_c0
GTGTTGTGATGCCACTGGAAAACGAAATGGCCAATCCCCAACATTTCCTCGGTTGTCCCGGCGTCCTGAACATATCTATGGTCATTGTGATTACCTTATACGGCATCGTCGGCTTCTTCGGTTACGTCCAGTATGGAGACGTTGTTAAAGGAAGCGTTACGTTAAATCTTCCTGAAGATGAAATCATGGCCCAATCCGCTAAACTTTTGATGGCATTAGTGATATTCTTATCTTATACGCTACAGTTTTACGTGCCTATGGAATGGGTCACTAGAATGCTACAAAAACGTGAATCAAATAAATACGAGAATTTTATACAGATTAGTATAAGGACTTGCCTCGTTACAGTAACAGTTGCGATAGCAGCGGCCTTTCCGAACTTGGAACTCGTCATAAGTTTTGTTGGAGCCATCTTTTTCTCCTCCCTTGGTCTTCTTTTCCCGGCTATCATCGATACAGTCTACCGGTGGGAACGAGGTTTCGGAAAATACAACTACATG
>c12659.graph_c0
GAAGAAAGAAGCCATCAACTCTGTTCTTTCAAAGAAGGCGGCTAATGAATTAACAGTCAACCTTTTTGGTGCTCTTGCTGAAAATGGACGTCTCTCCAGTGTTGATGGTGTGTTGAACTCCTTTGGCATCATTATGGCTGCTGTGAGAGGAGAAGTTATCTGTGAAGTTACCACTGCAAAGGCTTTGGATGCGGCCATGAAGAAGGAGCTGGAGGCATCACTCAAGGCATTCCTTAAGAAGGGTGAATCTCTTCAGCTGACAATGAAGGTTGACCCAACCATCATTGGTGGAATGGTGGTGTCCATCGGTGACAAGTATATTGATATGTCCATGGCCTCCAAGATCAATAAGTACACAGCTCTCCTCCGGCAAGCTGTTTAAAAATATCATCACTTTCCGAGAAAATTAAAAACTAGAATTGTT
>c12662.graph_c0
CAACTGAATAGAAACATATGGCAGATATATTATTATTTGCAATATTAGATTTCTTCAAATCTTAATTTTATTTCAACCTGTCTTTATTTACTCTTCTCAAAGACGTTAACTTTTTATCTTTCCAATATTTACCAAACAGCAGTTTTTCAATTGATTGATCGACTTTCAAACATAAATCCTATCAAGATGCTAAAACATTTTTTGATATATTCTCTAAACAATTGTTTGCTTCAATATTGGTTGTACATTTATTTAGCTACATAAAATATACATGTCAAGTACGTACACGATTGTTTTCCTTACAAGAAGAACGTGGATTTCTTACAGATGGATATTAATATCTCGCAATTTCG
>c12700.graph_c0
CTATTTCGTCATACGATTAAATATGTAAGTAGTTGATTTATGTAGGTAAGCAGTGTAAGACAGTTTCTTGACCACTCTCATACTGGAGATTTATATATAAAGCCTTCTTTCGAGAAGACATTCCAGGAAGATTTGGAAGACTTGACCAAACCTTTCTTAATGGAATACCAATAATAGGCAACTTTTATGTTAAAATAGTTGATTCAAGAGAAAAGTGTCCTGGTAATAATGCAATAGGTACAATAAGTTTGCCGACTTAAGCTTACTCCGCTACTGCTCCTAAGTATAAACAATTTATTTGCAAATGATTTAATAGTTGATTAAGTATGAGTTCAATTGAAAAGCATTAATACCAGTGACAGAGAAG
>c12706.graph_c0
GAATCCCAGTCTGGTTTGGTTCCCAACAAAATGCACACAGGTTCCATGACAAAACGCACTAGTGTTGGAGGTTTTTGGAACGCTTTCAGTTCATTGATGTCTGCTTTATTTAGTGCTTTCAAGGCGTTCTGCGCTGCTTCCATTGCAGGCATTGCCAGTGCTAGATCTGCTTTAGCTTCATCAGCTATTGCTTTTACTTCTTCAGCTTTGATCTTTGCTTCAGCTTCGTCTTTCATTACCGCTTGTTTAACTTCATCAGCAGCTTTCTGTTCTACTTTGAGCCTATTGACTAAAGCTACACTTTCTTCT
>c12717.graph_c0
GGATTTTTTATGAAAGCGTGTTCTTTTAAACTATAATTTTTATAAGATTACAGTACGAATTACGCTGTAAGAAAATAACCCCATCATTATATCGATTATTTTTCAAATCGTATATTTCCTGGGATTTATAGGTTATTCTTTGAAATTATCTTACAGCATTTTTATGTGAATAAAAACGTTAAATATATTATTTTGTACAATTTGATAAAACGACTCATATCTTCAGCTTAACAAATAGGAATAAATATGTTTGTAACTTTTCAAATCTTCAAGGCAAAGAACTTAGCATATTAATGCCAAAATCGGTTCAGTTATTGCACGAAATGCAACAGAGCATTTTTAAATTCT
>c12723.graph_c0
ACCGAAACTCCTGTATTTAACAATGTCATTATATTCTGGTTCGATTACTGCGACTGCAACAGTATCACCAACAATAAAATCTCAGGATAACTATCTAATCAGTGTTAATATTAAATTGCCCAATATAGATTTGTAAGTAACACTTTATATTTTAAAAAACGATTGTTGTAGGTTATCCTACTATTAATGTGATCTCTTATTATCTACTATGATGCATTATAGATAGACTTATACTTTTCTCTAGGCTTTCTTAAGATATACAATTCCATAGTATATTATTTGACCTTTACAAATTAAAGCACCAGGAAAATATTTTTACTAGTTGATTACAACACATCGAGTATCTCTATTTTTCTTGACTTTAAAAATCTTTTCAGTACGGTTTTGGTCTTTCTGAAGTTTATGG
>c12728.graph_c0
TAAAGATTAATTGATTATAAAAGTTAATTGGCTCATGTGCATTTATAGTATAAAATTTTACATGTTGGCCAACTAGCCTTTTCAAAAGTTATGCTTTAAAAAAGACTCACCGATACATTTAAACTTCTTTTTTAAGTCATTATTGTCGGAACTTATCTCTATAATGACTGAACTTTTATGTTTGTTCCTGATACATAGACAGATAGAGGATTTTTACAGAGGATTAGATGGCTACATATTATTAGGCATTATCATAACCACTAAGCGGTTTTATATACAGGATAAGCAGTATTTTAATTGGAAACTTTAAAATAGATAACTTGAA
>c12736.graph_c0
CCAAGAAACCGTATTTCCCGATCGTAAGACGCTTCATGGGATCTCCAGTAGCATAACCTTTAAAGTAGAAGAATCGGCTAACGTTGTAAAGCAAACCAAGGCCAGTACAGATACAAGGGTGCTTCATCCCACCGAGGATCATCAGTATGAAATACATTGGCATCATCTCTAAAGAGTTTTGATGTCCTCTCTGAACACAGTTGAAGAGCTTAGCATCTTTGTTTTCTGATTCTATTGCATATAGAGTTGGATACGGGACGTTGTACCTTTTGCGAGCTCTGCCGACTTGAGCACCCATCCAGAGGTTGAGGAAACAGTAGAAGACGAGGACGAGAACGACATATCCGTACTCTTTTGGTAGAAATTCTGTAATCGCCGCCATGGATATTTTTGAGATTGAGAGCGCTTCTGA
>c12738.graph_c0
GATGAATACAATGAATTTTTTATAAAACAAAAAAATGAATCAATTTGGGATAATTACGTAATAATAGAAGAGAATATTCCTTACTTTATTAATAAAGAGATAGTAGAAGATATTTTGTATATAGGGAAATGTATAGGATTAATAAAATGGATATGTAATAATGAAGGAAAAATAGAAATAGGGTGTATATGTAGGGAATGTCTAAATATAAAAGGAATTAGTAATGGTAATTTAAAGGGAAGTGATGTAAGGGATGTTAGTAATAAGGATCTTAGTTATAAAGATGTTAGTTATAAGGATATTGCAAAGGGAAGGCAGGATTGTAGTAATGGTGATGTTAAGGATTGTAACAATAACAACCTTAATAATAACCCTACTAAAAACCTTAATAATAACAATCAAAACACCCCA
>c12741.graph_c0
ACGGATAGATGGTGTATAATTTGAACTAGCATTATAAATACAAATGTCAATCGATTATCATGAAAGTTTTGGTACACATTCCGCACAGAGATATGCACCCGGTAACTTTTATTTTATTTTAGAAGAAATTACTGTTGCTGCTGAAGAGGTTAAATAAATATTATTGCGACGGAAGTCGCCAGTAAAAGCTAGTTGAAATATATTTTACAATCAATAAAGTTATTTTTTTTTTGTCTTTTACGGTAAAAGGGTTACCAATAGGTTTATAAAACTGAACAAGATAAAATTCTTTGAAATAGATTATGGAGTTTAGAGGCAAGGAGAACCATCTTTGTGTATGAAAAAGTAGGTG
>c12759.graph_c0
CCCGCATGAAATTATCGTAACGCTGTCTTATATGTATAATATTTCTACCGCCAGTTTGAGGAGAGGTAATATTTGAAGAATCCGCAAATATCGCCTGAACCGCCGCTGCTCGGTTACGAGGTGCTGAGTTGCAGGATAGACCACGCTTTTATTTGGGATTGTTATTCTTTTATTTATTTATTCACAAGACCACCAACCAGTGTAGGCTTTTTTATTTTTTCATCGCATAATCCTGGTGGGACCTATTTCCACGGTCCCATTACATTAATGATGCTTCATCAAAAACTTACTAAAGAGTACAACTTGAGTATAGAAATGGTTCTAACATTTTTAATGACTCACTGTAAAGTGTATTGGTTACAATAACAATAATTTATCAATAGGGAAGTTATTATTTAAAACAAAACTTAACTGGAA
>c12784.graph_c0
TCGGGCTACAAGGATTCAACACAACGCTGATCGACGTTATGTCTGAACAGGCTTTAAGCCCTCATCACGACAATCATGTTGTGTTTCTCTATCATCAGGCGTATATCTATCGATTGAGCGGGATGGCAGGATTTCTATACTGGAATTGAAGACTACCAAGGGGTTAAGTTTATCACGGATTCTATTTCAGTTTGCCACGTTTTAGGGTTATTCAGTAAATCTTAGCTGTTCTGAACCGTGTAGGTCTGCATGACGGTTGTGACAACAGCCATTGTAGACCTATCGACAGTCACCGACAGATAGTCCTTTTTAGATGGCACTACGCTTACATTTACAATGCCGGCGCTATG
>c12806.graph_c0
GAAACTTGGTTTAGAAGATTGTTTCGAAGAGATGATTTGTTTTGAGACAATGAACCCAAATTTATTCGGGTCAACAACCCGACCCGATGAATACCCGGTTGTTCTCAAGCCTTCGTTGACCGCAATGGATATTTGCATTCGTGTAGCCAACGTTGATCCTCGCCGAACAGTATTTTTGGATGATAATATCCACAATATTACCGCGGGTAAATCTGTCGGGCTTCGCACAATCCTGGTGGGAAGAGCAGAAAAGACGAAAGATGCGGATTATGCGGTGGAGACGGTTACTGAGATAGCTACGGCGGTGCCAGAGATTTGGGCTACGGCGACGGCGACAGGCGGATTTGACGTTGGT
>c12816.graph_c0
AGGTGGAGGAGTGTAATTCTCGGGAGGAGGAAGAGCTTTGATCTCATTCATATCAGGCTCAGGCTCCTCTTCTTCAACTACCGGAGGAGGAGCTTCGATCTCTTTCCTCTCGGGACTCTTCCCTCTTTTTGCCCTATCTCTAACAAACTCTTCCAAAGTCTCCAACAACTTGCTTGTAATCCTCTGAACTTCCGGATACTCAGACGATCTCGCCACACCCGTTTCCTTACACCAATTATAAAACGCAATAAGCTCATCAATCTGTTTAGCCGCACTAGCATAAGCATCAAAGGCCTTGACACAATCCGAATACTCCATATCGAAAAACTTATCCAACAAAACAGCCAAAACCTCACAAATATCAGCATACAGCTTAAAACTCTCCCTCACAACGGGATACAACGCGATCAATATCATCCTACTGTTCTTAGCTAAACCAGTAGGTCTCAA
>c12844.graph_c0
ACCAATAAAACAAACAAAATCACACCACAAGACCACGCATCAGCTTTTGCTCCGTCGTATCCCCTCCGTGAAATAACCTCCGGAGCTGTATAAGCCGGAGTACCACACGCCGTGTGAAGCAATCCGTTTTGTAGATGCTCCGGTAAAGCTGATAAACCAAAGTCAGAGACCTTGAGGTTACCTTGCTCATCTAAGAGTAGATTCTGAGGTTTCACATCACGGTGAGCGACACCGTCTTGGTGAGAGAAACGAAGAGCGGAGGCGAGTTGTTGAAAGTAACGACGCGCCGTTGATTCAGGAAGACGTCCACGACGGAGGACTTTTGAGAAAAGTTCACCACCGGAAGCGAGTTCCATTACGAGATAGATCTTAGATTTGGTTGCCATAACTTCATGGATCTTGAGTATGTTTGGATGATGACGAAGACGACGCATCGCATCGATCTCTCTGATTATTCTTGGTTCCATACCGGATTCGATTGTTTTCTTCTTCTCGATGATTTTAACGGCGACGAGCTCGTCGGATTCGATTGATCGAGCTAAATGGACTTTCGCGAAGCTTCCGCTACCGAGACGACGACCGAGTTCGTATTTCCCAAGGAGGATCTTCGCCGGAGTTGTTGCCGGAGATGATTGGTTTTGCGGCTGGGGAAGTGATTCCATGGCGGCGGCGGAAGGAGAAAATGGTGCCTGAGTTTTCTGAAGAGAG
>c12847.graph_c0
GACGTTAACATGATTAGATTTTTTTATTGTTTATAGCATTTTTAACGTTTGATCATGGTCTCACTTGATGTTAAATAACAATGTGGTCTAAGATAGTAAATACGCTAAATCTAAAGGAAGGCTGGCCCTTAAGTACAGCTTTCTAGATACAAATATAGAGGCTTGTTGACATATTTTCAAACTTGAGAGAGGCAGCTAGCTAAGCGGTCTTATAAAAAGGTCAACCACCATGTTATGGTTCCATAATAATGTTTTTCTTCATTAAATAGGTTATTAGATACGACGTCATTAGACGAGATGTCCGAAATGCCACCATTATCGCTTAAAAGTCACAATACTTTGTTACTTCTGAGACGTGAGTTTAGATGCGTCATGTACTAGTTTATGTTCGACTACACCCTTCGAATCATCGGGTGTAACACTACTTTATAATATAAATAGGTATTTGTGGTGATATCCCCACAGTAGTAAAATGTACAAGCTCTATATGTTATTCTCA
>c12859.graph_c0
GACAGTAAGAGAAGGCATATCCGAATTTGGAGGACACCTGGCCAAGCATGGACAGCTTGTTACGGCCCAGCCCAAGAATACCAGCTGCTCGCCCGAACAATCCGTCGCTGTCTTGCCCACACCCATACACGAAACCAGGCAGGGTCTGAGATGGGGCCAAGGTCAGTAGGTCTTGACTCAAGTAGCCCATGGAGTAAGACGAATCGCCATAGCTGGCCGTGTAAACGCACACATTAGAGGAAGTTTCACACAAGGGGTTGTTGAGAGTGGCATCCACGAGGGAGGAGCACTGAGAGGAGGTGCATGACAAAGATTTATAGGTCTTAGATGCTGAAGGATCGAACAGAGGGTCCGCCTGGACATGACAGTATACAACACAAG
>c12875.graph_c0
GATTATATATATTATTATAATCAATTGAAAATGAAAGCATAACGATTTATTTCTATGTGCTCACAGCTTATGTAAAAGATTAAATTAATAAAAAACTATATGCAATAACTATAGAGGTACGTACACTGTAAGCAAGAAACATTTTAAAACCTGGAAAAAGTTATGTATTATGGTTAACTTTCCACCACTGGCCAACCATTAGTAGTAACTTTTAATTATCAAAGCGAAATTACTAAAAAGCTATGAAGAAATGTTTCACTAACAAATTTTAGTCCTCATGAAAATATGTTTTTTTTTTCACTGGGCAGTACTAATTTAATAGTTGAAATAATATGTCAATGCAAGCTTTTATTATACATTACTCATGGAATGTGTCAGCAAGATATTTGTGATTCATATGTGATTGATGGGGCTAAGATTTTTTAATAGACCTGTATG
>c12901.graph_c0
GTTGTTTCTTTTGTTAAATTCTGTAAGACCGGATATCTTTTCAGAAGTTCGCAATGCGATGAATAGATTTGCTCAGGGACACATGGATATGACTGAAGATTTTTTTAAAAAGAATAAGGAACAGTATATCTCAGATCCGTTTTTTAAAAAGAATTATTTGGAGTATTTAATGTCTATTGGTGATTACACAACCATTATTAGAAGTAATTTAGATCCAGAATACACTAAAAAAGCCAAACAATTACAGCAAATTATTAATTCGAATGTACTTGAAGAAATTGTTAAATTAGAGAAAGATAGTCCGTATTCTGTTGATGTGATCAGAGCATCACTAAGAATTTTACTTATAAATGGTGATTACAAAGCAGC
>c12917.graph_c0
GGTCAAAAGTCAGTGTTTAAAATACAATTTAAATAGTATATTTATTTCAAATGGTCACCTACCTTAAATTTAAGTCTATCAATATATATTTACCAAGCCATAGAAACGTCAAATCAAATTTCAACAATCAAACATTTTTTTGACTAAAGTATACTAAAACCATTGAATAAATTTTAACATAAGTAACATATAAATTATTAGTATGAGTGAAGGTTTTTATTTATATTTTTTTCATTTTTTGCATTTTTATTGTAGGAAACGCTACGTGGTGATGTATATTGAAGACACATCCAGCCTTACCTGAGAGGTGACGCCTCGACGCC
>c12945.graph_c0
TGGGACCATTTCAAAACAGATGTACAATCGATAACATTTGTTTAATTGTCGTCCATTGGTCAAGTATGTATGCAGCATTATAATGAAATAAAAAAAAACTGATGTAAATATTCGGCACTAACATGACGGATATTTCTTCTCTTTCATGGTCTCTTAATACTAATTACTAATTAATCCCAATATCGCACAATTTCCTAGTACACACAGGTGTTTCTAAATTGATAATTCTACCATTGTTTACTTGATAATAAGAAAGATTACATATCTAGAGAACTTAATAAAATAACGAATTGTCAGAAAATAGCCGTTTATTATAATAATACAATAAACACG
>c12959.graph_c0
GCTGGCCTATTGAGAAATTGCTACCCCCTTCGGATACTTTGTAATCGAGCGCCGGAATGACACCTTTCAGTTCGACTTGTTCAAGCGCTTTCCAAATGTTTTCATCGGAGTAATCGTTAAATGGATCCAAATTGTACCTCACTGTCTCTGAGAATAAGGTTGGTTTTTGAGGAATTATTGATATCTTCGACCTTAATTCCTTTTTCGTAATATCATTTGTATTAATTCCATCTATTTTAATATTGCCTTCGATCGTATAAAGACGAAAAAGCGCTGATATCAAAGAAGACTTCCCAGCTCCCGTTCTGCCTACAACACCAACCTTCCAACCGGCTTTTATTTCCAGGTTTAAATTATTCAGCACCGGAGCTTCGTGTTCGTTGTATT
>c12964.graph_c0
AATTTTTGTGTATTGATTTATTATAACTAGATTTTTATGGTTAGATATTGATTTAAATTTGCAAATATTTCATTCAGGATGAAATACTTCATTGCGATTACTCTTATAGAGTCGTATTTTAAGGCTAGATCTTTTCCATCTCCATGGTGTGAATTATTTATATGATTTTATTCTATAGCTAAATATAAAATATGAGGTATATATTCCTTAGTTATGATTCTGTGCCCAAAAGTTTATTTAGAGCTGTTACCACTTTCAATGCAATACGCACTTTTGAACTTTTTAATAATTGTTTAGTAGTAGTTGGTTTAGTGGGTAGTACATAATAACTCAGTGTATTGAATAATGTTCTGGGCGCACTCGAAAATGGCGCGTCACTGTGCCGGAACTGCATTTCATTG
>c12969.graph_c0
GTTTAACATTGTGCAAATAAATATTCTTAATTTTCATGACGATCTGGTAAACAGTGCAGAAGTTGACATGCTGCAGCAAAATCAGTATCGCGATATAAAATTAATTTCAGAACGACGCAGTTGATAACAATAAACATAAAAATTGTAATAAACATGTGAAGGTATATTTGTCTTTCACTCTGAATGAAGTAGAGAAAACAGATATCAGGCGTCACTGTCAAGTGTCAGTCATCGTTCTCTATTGTCGCTGTAACAATTTAAGTTCATCGTTATTCAAATACAATCTAATAAGTACAGTTCACACCAAACGTTTT
>c13012.graph_c0
TGGTTTCAGAACTAAACGACTCATCTCAATTAAAGTCAGCGATCGCAGTTAAAGCAGATGTGTCAGACCCGGACCAGATCAACAACTTGTTTGATCAAACAGAACAAGAGTTCGGATCTAAAGTTCACATCGTCGTGAATTGTGCAGGTGTTTTGGATCCAAAGTATCCATCTTTATCCGAGACGACACTAGAAGATTTCGATAACACATTCACAATAAACACAAGAGGGTCTTTCTTGTGTTGCAAGGAAGCAGCTAAAAGGGTTATGAGAGGAGGTGGTGGAAGAATCATTATGATGTCTACATCAATGGTTGGTGGTCTCGCCCCGGGTTATGGAGTTTACGCAGCATCAAAG
>c13013.graph_c0
ATTTTTCAATAAACGGATTCTGTGTAAAAGTTTGAGCTTTAGGTTGTAATGAGGTTTGAGTTTTCGTCATTTTGTTTTGAGAATTGTATTGGTACATAAAATTAACTTCCTCAAGAACTATACTTAAGGAATTCTCTAACGTGGTCGGGCCCTTGAGACGCACTATCCGGAGCATCTCCTCTGGCATGTTGTTGTTGTATAAAAACACATTCATCGACATGTTGTCATATATAATAATTTTACTTCGACGTAAATTGACGTCAGTAATAAGGTTAACTTTGCCTAGTAACGTGCTTTTAACATGTTGTATCCTATTACAGAAATCGAGATAAGATTCGCCATTATTG
>c1302.graph_c0
AGCGTTTTGCCTTTATACTATTAAGTAGTAGCTTTATATTTGGTAATTTTAAAATGAAATCTTATTATGCTCATTCTCTAATGCAGAATTGATGTGCTTTTCATTTTTTTTTTAGAGTCAAGGGTTCAATGCTTGACAATATTTTTTTCAGATATTAAATTATGATGTGGTCTAACAGGGCAAATATACTAAACCAGGAGTAAAATCCACTTATAAGGTGTTTTGGGACTCACCTCCAAGTTCTTGGAGACAAATTTGTAACATTAGGATAATAGCTTAAAAAATTGATACTTTTTTCACAATGTTTTCTATAACTGATAGCTCTGGCTCATTATAAAGATTCGAACTTATGTCGATAAATATTTAAAAATAACATATACTTAAATTTTATATCATAAAATTGTTAGAGT
>c13032.graph_c0
CCATCTAAAACACGTACTTTATGTCCCATCATACTAGCTTTGTGAAGAGTAGGCTGCCTATTTAATAAAACAACATCACCGGATTTTAAATGACGCCACACTACTTTATTTCCTTTAAGAAGTTGATTTGCTATAGCTACTCTCTTTTCTGCATTCACAAATTCTAAACTTTGCAAATCACGTCCAGTTTGAACTATAGTTGCACCAGGATACACAGGTCCATTAATAACCGCCTTTCGTAATTCATCGTAGTTTATAGAATTAATTCTCTCAGGAAATGTCAATTTTTGAGCAAATATCTTAGGAATACCAACTTCAGATGTTGATAAATTTGGATCGGGTGAAATAACAGACCTGGCTGAAAAATTTACTCTCTTTCCCATTATATTCCTTCTAAATAAACCATCTTTCTTTTCAAGTGTCTGTTTTAGTCCACACATATTTTCTTTATTTGTTGGTGCTTTAGAAGTATCAAAATAGCACAAAACAGCTGCCTGTAACTCAGGCCAAAAATCTTTA
>c13045.graph_c0
GTAATACCGGTGTAGATATTTTTTTAATATTTTTCCTCATATTCAATCGAAATATTTGTAAAATTTGCGTTTTATATGTTATAGAAAAACTTGACATTAAGTACTGGACATGCGGAAGCTTCAATATATCATATTATGTATTTATCATGTTAATAGTATATCATTTTAATTACGTAGTGTATGTAGCTATATTTTAAAACCTGTAAGCTACAAATAATACAGCCATCTATTTAGGTTATTTAGTATTTAACTTAAGTAGTATTTAAATTAAGTATTTACCTATATAGTAATTTAACTATTAGTACTTTTAGTAGATGCTTTACGTTTGACTGCATTATTACGAGGGCAATTCACGTCGACTTATTTAAAAATTATTACTGAACACATTTATCGTCTTGAGCAAGAAATCTTACTTTTATTATTCGTCAAAAATTGTCCCCAGTGATTACTACTTAAACAGG
>c13047.graph_c0
TGTTCCTTAACTTTGATTATTTATTTTCCACACATAAAAAGAAAACGAATACAATATCGATCGAAATAATTAAAACATGTTATTTTTTTTAGAAGATTTACAATTACATTGTTAAGTACATAAATAAAGCCAGTAAGAATCCAAATGTATATTTAGTCGATTATACACTGCGGCTTTGATCGTTTTTAGATTACGTTCTTACTTTTAGGGTGACTCATGCAACTATAAGTAAATTGCGTCGTGAAAAAATTCTAAGAAAACTATATAACTACGGCGAGCAGTATTCATTATTGTAGACAACAACTCGCCGTAGTTATATAGT
>c13049.graph_c0
AGTCACTTTGTCGTGTTCATATAAAAAAAAAATCCACATTACCATTCTCATAAAATACCCAAAAGAGTATTTCAGATTTATTAAAAAGAAGAGAAATGAATACTAAAGCCTCCGATACACTAGGGTACAAACGGAGCAACATGTTGCGGAACATGTTACTCAACAACTACGTAAATTTACCGAGACAAATGTTACGTAACATTTAGCAGGCCACACTAGTCAGTGTTTATACAAATGTCGCCAGAGGAGTTTGTGGCGATTAGTGTTGTGTACATACTTATTTTGTGCGATATACGTACGTGAAATAGAAGGTGGTGG
>c13055.graph_c0
AAAAGTGGTCATGATTTGTACAGATAAAAATTCAGACGAAGTGACGGGTTGTCGCTTGTATGTTATAAAACTTAGGTATGATCTTAAAATGTTAAACTTTCGAATAGCCGTCATCGGATAATCAAGCGAACTATGTAAGTTCTTAAGGGAACAGGCAGTTAAATAAAAACGTAACCTCGGTATGTAATAACCATAGAGGTATTATATTATGAAGCATCATCTCTATTCATTGGTAAGTTGGTAATGTATATTAATTTTCTATAAGCGATGAAAGTTATAGATATTTTTATCTAACCTTTCGATATAACCCCGACATAAAATATACAGACGGG
>c13058.graph_c0
GTTCGAAAAAATAAAATCTAGATACATACACTTCGTAAAATAATATCAAGGTACTCATTTGGTTACCTATTCTAAATGTTAAAGTCGAGATCCATGTTAAATCTCACTAAAATATCATCGTTAGATATAATTTTTAAAACTCAAAACATGTCATAATTTCATTAAAAATTATTATTCTTAGCCTAGACTTTAAAGAAAACCAGATATAGGGAAGGACGACATATTTATTTCAATCATACAAATACAGTTTTATTAATATCAAAACATATATTTTTAATAAGCAGAACAATTAAAAGTATCTATGAACCTGTTCCAATTTCTATTAAAGCGTTCAGTAACTGT
>c13064.graph_c0
GTGGCCCAATCATAATCTAACCTGAAAGATAAAATTAATAAGATTTTACTAAATTACAGTAGTACGTATCCTAATTCTAACTAATATTATGAATATCAAATGTGACTTAGTTTGTTGAAATGTATATGTCAGCGCAAATTCCGTTTTTACCATCAAAAAGTATTTGTACTATCACAAATATTACTTACTACCCTCTAATACCAAGTAAGCTTATAAAAAGCGTAGCGAAAACGGGATGGGGGACAGTCACGCGCGAATCGTCACACCATTCACATCTCCACATATATTCGTAACTATATACAATAGTGAATTTCTCTATCGGCTACTAAAGATGACGTTTACATAGAACGATACCATACTTTTAAAACTGCTAGATCAACGTTGCCCTGAATTACAAATTATAATATAGATACATATTTTTTATTTACCATTATTGTAAAGAGTAAAACGTTTTCTGGTTGTGAGATAAATATAATCTTTGAAATTGTCGGTTCAATTCCAGAAATGATTTCACAAACTTTATTCTTATTCTCTTTCGTATTACATCATGCGTAGCTCGTAATAAGCCGTCTATATATTTAAATGT
>c13073.graph_c0
GCAGCTTCACGGTACGGCAGAGATATGATATTGCGAACTGTTTAGTTCGTGTTCGGATAGAATTGACCGTAAAACTGTTGCTCCGAAGACCAGCGCGCGTGATTCGTATATTGGAGAGGAAGGGATTGATTTGAATAACATTTAATATTTGTTTCTAATGGCTAAATTAAATTATTTTCAAGCGATGATGGCTCAGTAATTAGTCTATTCGGAAACAGTGTCGATCGATGTAGGATCGAATCCTTGCGAATGAGCTAGGAGTTTTCATTCTTTGAACGATGTTTTCGTTCGTGATGCAACCATAGCATTATGATAGAGACTTTTCTAAGTCCGCCTCGCTGGCTACAACCTGTCGCCATGCACCTGTTGGAGTGCTCCAACAGTTGCAAT
>c13079.graph_c0
GCTCAGAAGGTATTAAACCAAACCCAGATAAGATCGCAGCTATACAGAAATACCCCATACCAAAGTCTCCTAAAGAAATAAAACAGTTTCTCGGACTTCTCGGTTACTATCGCAAGTTTATCCCTGACTTTGCACGAATCACTAAGCCTATGACACAATGCTTAAAGAAAGGACGGAAAATTAACTTTGACTCTGACTACACGCACTGTTTCGAAAAATGTAAGACACTACTGACAAATGATCCCATTCTATGTTACCCTGATTTTGAAAAAGACTTTATTTTAACGACGGACGCATCTAACTTTGCAATCGGTGCAGTTCTCTCGCAAGGCACTATCGGCTCAGACAAACCAATAGCGTACGCTTCACGTACACTAAATGAGAGTGAAATTAACTACAGCACGATTGAAAAGGAGCTGTTAGCAATTGTCTGGGCAACTAAGTATTTTCGGCCGTATCTTTTTGGTCGAAAGTTTAAAATCGCTACAGATCACAAACCACTAGAGTGGATAATGAGCCTTAAAGAGCCAAACTCACGACTAACGAGATGGCGTTTAAAGCTGAGCGAGTACGACTATAAAGTTGTCTACAAAAAAGGTAAAAATAACACCAATGCCGACGCTCTATCGCGTGTTGAGATCTGTAACGAGGAAGTTAGTTCGATGATTGCAAATGCGACT
>c13100.graph_c0
GGGAGCGAGCGATGTCGACCAGGGTCTTGGCTGCAGGGTGAACCACATCCAGCAGTTTGAGGATGGTGGCTCCATCGTTGGAGATCGTGGCCTTACCTCTGCTATCCACCATCAGTTTGTCCATCCCCCTGGGCCCCAGGGTGGTCCTCACAGCCTCAGCAATCACCTGGCAGGCACTGATGTTACTCACAAGCTGGGGGATGCCTTGGGAGCTATCAGTCCCCTCTTTCAATAGGATAACTGGTGTGGGCATCATTTTGGAAGCTTATTCAGCGGCCCGCCACTCTCCCCTCTTCTCCGAGACC
>c13104.graph_c0
CGCGATGCCACGCCGACCTGAGCACGCGCTCCACGTTACGCTCTACGGCTCAAAGCTCGCGCGGACTTAAATTTCTACCCCAAAGTGATGGAATGGATATTCTCTAAGTGCTAAGTGATTGACTGATTTTAATTTAACATTTTTAGTGTTACTGGAACGTAGTGTGAAGGAAAGTGAAACCGATTGAGCTGTGCAGTTCATAAAAAAAGGGATATTTTATTTAACTCTTTTCATAATTGTTTTGTGATAATCGATCAAACTGAATAAATATTTAAAGGATAAACTCAAGTTAAAAGTGTTTCAACTCAGAGAGAGTAAAAACAACGCCGCCAAGCTGACTACCGCAAATGAGATTACACCCGGCTATCACATCGAAGCGCTAATAGGTCGGTGGCGCACGAGCCCGATGAGCGCGTGCGCGGCGGCCGCCATGCGCGAGAAGCACGCGGCGCCGCGCCGCCTAACCTCTCCCCCGCACTCGCCCCTCGAGCGACATTCCAGCCCGCTAGGCTCCCCTCGAGCAGACGAGCCCCTCGATCTAAGAGTAACACACAAACGTCCCGCGCGACTAGAAGATGAGAACTGTAATTTGATAGCTCCTTCGCCACCCCCGCCTCCAACGCACCCAGCGCATCCCGCACACCCAG
>c13107.graph_c0
AACATTACTTGGCTGCATGGTCTAGCTACCTTTGCATTTTCCTTAGAATGGAATAAACAAACACTAAAGAAAAAGTCTGTGAGCAAAGTGAATATATCACACAATTCTGACATCTGTCAGTTAAATTAACCCCAACGTCATAATGTAATCCACGTATAGCAACTGATCATCGACAAAACCCTTACTACAATTCGTTCCTCCTCTACATGAAAACGTCTATCCGCTCGTTAACACGTAACCACACAAATATACATTTTGGGCGATTTTCAACAGGGCCGCTATTCGGAATTAAATCGCCTTACAATATAAAACTAAGCAAATTGTAGCTTCAAATCTCTAGTTTTTGGATTCGACCATGAAAAATTTCCAGATATTTTTTATATTTCAATTAAAATTTTATCTTACATCATTTGCTTATTGTTCAAGTTTGTAATAAATGCAGTATTTTAT
>c13116.graph_c0
ACCGTGTAAGTAAGTGGGCTTGATCTGGTTGGAAAGCACGTACGATATGGAAATGTCATCCCAAGAGAATGAAAACTCCTGCGAAACACCGAGTTATCGTCTACCTATTTAATAACTTGTTATTCATGTAGGTTTTACCACATTGGAAACGTAACCAGTTTCAGAGTAGATGGCAAAGTAAATCCAAGAATATTTAGACACAAATAAACCAAAAATTGCTATAGATATTGATCATGTTTCTAAAGATTTATAGTTTTAAGTCTCAAAAATTATATCTAATCGCACGTAATCTATTAATACACAATTATGTTTGTATTAATGTTTGACCATCAAACACACCCCTATGTCTAGATGAATTTTGATTAAATTCGACAAAAAAGTCTATTATGTTTAAGAATAGATCACAGGATG
>c13129.graph_c0
GCCCAGCAGCCCCTTCAGCTGCGCCACGATGATGATCACCGCTGTGGCGGACGTGAACCCGCTCGTGACTGACGGCGATATTAGATCCACTAGAAAACCGAGCCTAAGCAGTCCCATCACGAGGACTACACACCCGGAGAGGAAGGTAAGCAAAACGACAAACTCTACCGGCAACCCGCGACAGATTTGCAGCGTGAAGAGCGCCATCAAACTCGTAGGTCCTATCGACACCTCTTTCACTGTCCCCAGCACCACGTACAGCATCGTACCAACGAACGAAGAGTACAGTCCATACTGTACGGGCAGGTTCGCGAGCGATGCGTAGGCGATGCTCTGAGGTACCAGCGTCAAACCCAGG
>c13140.graph_c0
ATACGATACGTTCTTAAATTAGCTCGGATAAGAATGGCAAATTGTGCCACGAGCAAAGAATGTTTTATCGAATTCGTCGGTTGTGTCAGAAAATACCGTAATAGAAGCCTAGTTTTATTTCTTCTATCGTCATTTGCACTTATATTTGCATATTGCCTTTTGCTATCACAATATTGGATGTGGTTGTTGCGTTACTTAAGGTCGCTTTTAAATTCCTAAACGTTACTGTAGTTACTTTACATCAGGTGGACTCTACGCCTTATTTCTACAGTTATTTAAAAAAATACTGCAACTATTCAGACAAAGAGTAACTTTTTGTTGAATACAGGTTGATAATGCAGCATCGTGTCTCTTTTACTTTTATCACTCGTTGCATTTCATTCTATTATTTCGAAATCATACTAGGTAGG
>c13150.graph_c0
TATGGACCTGGCCCTATGGGAGCAGGACGATCGGGTGTTTACGTTAGCTGAACAAATTATTGCGGCCATGCCGGATAGAATAAAGAATGAAAGCACATCGCTGCTGTCCGGTTGCGTGCTGGAAGGCGGCTGTGTAAGTGGAGAGGAATCACTAATGGCTCCATTGCTGGACGATTCCACCACCTTCAGCGCTGAATTCAGTTTCGAGTTCTGTGATAACACTTACAGATATTGTGGTGGTTCAACCCCGTGTTCTTCTGGATCGGTGTCACCTGGGTCTGCGCTCTCCCCCCCACCGCCATCCCCCCGAGGAGCGCTCCCCCCCACCGGCGCACCGTCTGCCACACTCCAGGAGTTCTTGCACACGACCACACATTTTTCGAACTTGACTCTGAACGATCGTGAACAAAGGGAGCTGTACTCCGCAGCGATAAC
>c13157.graph_c0
AACTATATAAATAAAAAATAATTGCCGTCATGTACGTAAGCGCATCACTTTAAAACGGCTGCACCTCTTTGGCTATTTTTTTTTGCGTTTGTAATTTTCCGGACAAGGATTGTATATAATGTAAAAAAAATCGTACTGGAAATTGAAAAATGTCGGCTGAAAAATCTCCATATAAAATGTGACTGAGTGCAGACAACAGTACGTAGGGAGATTTTCAAAAATACTGTGAGATTGAAGTTCAACTACCATTTCATTACATTACATGTTCGTACTATAAAGGGAAGATTTAGTCACATTTTCTACGTTAGTACACCCGT
>c13164.graph_c0
GTTCGAGGGAAAAAAAGCTTTCCAAAGTAATGTTCAGTGTAATTGTTATAGGTGTTTATCAAAATTAATAATTGTTATTATTTCGTGTACAAACGAAACCTTTGACATCTCATCTTTTGCATTTATGTCGTTATTTACAAGTTACTTTATAAATTAGAAATGTTACAAACACCAAAAAAGAGAATTGATATTTCCATGTTTTCGATAAGTTTCTACCACTCCGTTACCATAATATACGTTACTATATATATACTTATTTCTACTTCATTCAATAATCGAATGGCATAACTTGAGGTAAATACTATGAACT
>c13175.graph_c0
CTCGCCGTGAGACAGCAAGTGTCGGATCCGCAGGCGCAGCCGTGCGATGTTGTCCTCTACAGCCATGTATTCGGCTGCTGGCAGAGACTTGGGGATGGAACCGCACAGAGCCGCGGGCCCTTTGCAGCTGCGATTTTCGCCCTACGTTTTCAACGGAGGTACTATACTGGCAATTGCTGGAGAAGATTTTGCAATTGTTGCTTCTGATACTCGATTGAGTGAAGGGTTTTCAATTCATACGCGGGATAGCCCCAAATGTTACAAATTAACAGACAAAACAGTCATTGGATGCAGCGGTTTTCATGGAGACTGTCTTACGCTGACAAAGATTATTGAAGCAAGACTAAAGATGTATAAGCATTCCAATAATAAGGCCATGACTACGGGGGCAATTGCTGCAATGCTGTCTACAATCCTGTATTCAAGGCGCTTCTTTCCATACTATGTTTACAACATCATCGGTGGACTTGATGAAGAAGGAAAGGGGGCTGTATACAGCTTTGATCCAGTAGGG
>c1318.graph_c1
GGGTAGCATAATGGGAGGCCTCAAACCAAGAAATGTGTTATTTTATTATCTCTAGTAGTAAAACTGACTTACTGGCTACTTAAATTGTAATTAAATGATAACTATAACTAATAACTCAATGAGTTTCTTAGTATTCAGCACTACTTAATTTTTCTTTATTCTACATGATATATTATAACATCAAATATTGTACTCTAACAAGTTTCATGACATCTCTAAAGCCATATGAAGTTCCCAAACCATTCCGAGTCTGCGATGCACTCAGGAGACTTATTTTTGCTACTTTTGTTTTACATTAATCCACATAAAGGGCTCATTTTTATTTTATATACTTACTATTA
>c13200.graph_c0
AACAAATTAGAAAAGCTGAACGGATTTAATGGCTTATATATTAGACTATAAGAAGTAATGTAACTAGTTATGCGTGTTTATTGACAACATCTACTGAATTATACACAGCATATGTATTTTAACACATTTATTATATAGTCTTGATTACTTTATTTCCAACAAGTAAAATTACTATTCATTATCACGTTCCAGATGCACATTTTTGAGAAAAACTGTCTCCATTATAAGTGGATATACAGTAGGGAAGCGTTACAAGAGTGTCCAAAATACAATGAAAACCAATACATTGAACCAGGGAAAGCAAATTGTTCTAAATTGTGGATGTAAATATAAACATTTGATAAACAAGTTCA
>c13215.graph_c0
AAACAGGCTTCTTCGTGTCCGATTCTGAACGAGCTCGCTCTTTCTCATCCAATTCTCTCCACCGTCTTCTACTCCGATCAATCTTCAAATTTTCTTAACACTCATCGACCAGATCGAGTTTCCATCGATCTAATCAATCAATCATCAGATTTGATCTTCTCAAGAAGATGAGCTTGAAGGGTACGATCGTATTACTAGGGCTCTTATGGAGCTTCCAGGCTACGTTAGGGATTAGATTCGTGATAGACCGTGAAGAATGTTTCTCCCACAAGGCTGAATATGAAGGTGATACGCTTCATGTCTCTTTCGTCGTCATCAAGTCTGACTCTCAAT
>c13221.graph_c0
ATGTGATTTTTTTTCGTAGATGATTCTAGGCTACTTATTTTTAGATTTCATTACACCTCGTCGATTTTTTTTAAATTATAATAATGTACAGCGAAACGGGCAAGTATCAGTTATATGAATAATACATTACAATATAATGGAACGTAATTACTTATTATCAACTTATAGGTTTCTTTTATAATTGTGTAACCTAGAAGCGAATGTAATATAATATTGGCTGAATACATTTATTTAATTACTGCGTTCAACAAATCGTGTAATTTATTATTAATTCAATTACAACAAAACGTACTTTATTTTTGTGATAACGATGACTTATAATTATTATCTAAATGGACTATATACTAGAAATGTGATTAAAAAGTACTTATGTTATTAGAAATGACTAGTCTTATCGAGTCTACGTGTAGTTTGATAAAGTTTGTGGTACTGTCTGTGTAATAATGAAATATCTTTGAACTTATTAGCTGTTTGCTTTCTGTCGGTATATATTTAGCGAAT
>c13226.graph_c0
GGTGCTTTCGGTTCCACAGTGCGACAGTTCTCTGCCGAGTCCTCGTATGAGCCGTAACCGTTCCACGGTGGTAATTCGCGTTCAGCAACGTTCGCAGTTACGCATTCTGTGCTTTCGTCTTTTGGAAACGGTAGTGGCGTGAAAGTGTCAAAACCATAAGTAACTCTATAATATTCTTTGGTAAACGGGTCACAGTCAGTCAGAACAACATTACGTCCATAAACATTTAGGACCGCTCCGATGCTCAAATCCGACGGACTGTAGGAAGGTAATTTCGGTCCACCGGTCATTGGTACACTATGAGGAATTTTACTAATGTTTCAATTTTACACAACATAT
>c13238.graph_c0
GTGGGGATTACGATACGTGTCGTTAGCTGTGTAGAATATAATGAGAATTCCATTTCAGTTGTCCTTTACGGGGTCATAAGGGTTCATTTTTTTAGTGGTTTTTTTTGGAACAAACGGTGTGGTGCTTATGTTTTTGTCCTGTATAAAATATATTGTTACGGTCGGAAATATAGCAAGTACGATATTTTTCGAGTTTCCCTGGATCCATCAAGGTTAGTAGTGCCCGCAGTTATGCTTAGTGGTTCTCAGACAGATTTGCAATAACATGCCTCATTATCACTTCACATCTCTCGGTCTGTTACACTTCTCTATTCCCAAATATCCCTCATGTACAATATGTAACATCTCTTGTCAGAATTTTTTCGGAATGTCTAAATCGCCTCGTAAAAGTAGTTAGGTAGGTACTTATTTTGATGTCCAAAAC
>c13254.graph_c0
TGGGCTGCCACCAAAGAAAGATGAGAAAATATCAAATGGGTCGTGTCCACCACCTCCACCGCCCATTCCTTCCTTGAGAGCATCTTCTCCATACTGATCATATATCTCACGCTTCTCGGGATCACTCAGAACCTCATAAGCTTGTGCAAGCTCTTTAAACTTTTCAGGATCACCTCCCTTATCAGGATGATTCTTAATAGCAGCTTTACGGTAAGCTTTCTTGAGATCTTCTTGTGCAGCAGTTTTAGGAACACCTAAGATTTCATAGTACTTCGTGTTGTCGCTCTTTTTCGGTGCCCTCCCAAACATCTTCGATCGCTTAATTTAGTCAAAATTGAACGATGATAAAGCGCGGCGAGAAGAAGAG
>c13314.graph_c0
GGATCAGTATGTGAATGATGATGCTGTCCTGAATTGACTACTATATCTTCTAAATATATAAAACTCCAGTGTCATTATATTTGCCCACGATGAACTCCGAAATTACACAACCGATCTGCATAACAGTTGGCATTTGTGTATAATTTCGTCCAACTTGCGAGATAGGATAATTTATACCAACAGAACTCTCAATATTTATTATCAAAATGAAATGTAAAAAAATATATAGGCTTTTGGACCTAACATATGAAGAAACCGAAGAACAACTATCTTTTACATAATTAATTTACTTGGATTTGTTTCTTTCAAAAGCATA
>c13326.graph_c0
TAAGAATTACTACACCTGAGCATGAGGGATGGTACCGGTGCACGGCTAGGGTCCAGCACTCGTTTCTACACCATTCATTTTATCTTGATATACGGGAACCTCCAAAACTGACCAGAAGCGGGGGAGGTGGTGAAACCGTATGGGTAGTACGAGGATCCACGGCACGATTAACGTGCACCGTCAAAGGAGAACCTGAGATCCATGTGCAATGGACACACGATACGAGGCCTTTAGCTTTACATGGCGCTGGTGGCGTCGAAACTAGAGATACGAGCAATGGAGTTTTATCTTCTGAAGTGATGATAGCCCAAGCGGGACCAGAACATGCAGGGGAATATCGATGTCTGGCTAGAAACTTGTA
>c13344.graph_c0
AACTGGGACGAGCCGAAGCCCCGTTGCATGAAAATCCCGGACACAAGTTTATTTTCGGTTTCTATAACGGAGTTCTCGACGCCGCTAACGATACTAGCCTTCGGTTTCATCGCTTCATTAATAACGCTCGCTTTGGAAATATTATTGTAATTTATTTAATAAAGTGAAAAAAAAACAAGGCGCTAGAAGGTCACCATATTTTCTTGGTTTGTAGTATATGACAGTAGAATATAGAGGCGGATGAGAAAGAATTACAATAACCTAGGTGTTTTGATGTTTTATCGAAAAGGTCTTACGTAGTATTACCTCATATGCTTATGTACATTTCCAAGCAGAAGACTGGATATCCGATGAAAAGTTCTTGCGAAGTTATAGAAATTGTACACCATTTGATGCAATGTGTGAAGAGCTACAATATTATAATAAAATTAATTAGGAACTTTAATTGGAATACGCTAGATATCGGTATGTTCTATAAAATATAGTTTAACCTTCTTTTGAAATTGTTAAAATAATGTTTCGGATGTGTGAAATATGATTGCCGGATGATATGAAAGGTAAAAAATATATAGAAGAATGATTGTAATATTGAAATAATTATTGTTTGAGTATATAAAACTTCGTTATACGTTTTGATTTGTAAAGGAAACATATGATATAAATCATCCAGAACAAATCAAACAAATGAAGCGGGATGAAGAA
>c13347.graph_c0
AGAAGTTTCACTTCCGAATTCTAAAGATAGATTGACGGACAACCTACATCCTAAACAAGTGTATGTAAAAACATACAATTTTGCTCAAGAATTCCTATAAATATTATAGTGTACCTACCTATTACCTTTGTTGCAATAAGCCGTGATAGGAGCCAATCTATTCCAGGTGGACGTGCAAAGTAACGTCCACTATAGTATTTAGTGATGAATATCCGCAAAATAACGCCTTCTTCAACCAAATAAATTAAACATCATAGTTGAACGGCAACGGCATGACGAAGTAAACTTAAGAAACGATACAATCGGTTGTGCTGCAAATAAATCTACATACTTCGGAATCTTAAGTCGTAATATATAAAAAAAACCTAGTTTGCAATAAATGAAGAAAAAGTTAAATGGTTTTT
>c13360.graph_c0
GCCACTTTTTCTTCAATTCCGCCCTATAAAACGCTAGGAGGGAATGAGGCTGAGTAATTACTAAGATTTATATCGTCTCGATGTAAAAAAAAACAATGTGTTACGTACAAAGCCTTGTAAGCCTGCGATACCATTTTTCAGATAATTCAGCCAATTTAATTTACCTATTTTTTCTGTATGAATAACTGATAGATTTACTTTAAATGAACGAATATAACAATAATTGAATTGACTTTAATATTAAATGTACCTACGTAGATAATTTTACTGAAATGCGCAGAGCAAGGGAATGTTTTCCATGTGTAGGCA
>c13365.graph_c0
GTTTATGGAATTTGATGAAGATATGGAGACAATTTCACGATTATATACATTTGTCAATCAGGAGAAAATTCCTGATCGATGACGGGATAAACTTTTCCTGATCGATGATGGGATAAACTTATAAAATTATTTTATAAGTACATTTGTTGAAATTTAATTTGAATGAAAGCACTGAATAATTAGAACTCCATAGTAGAAAATTAATTAATGTATAATTCCTCATTACATATTAGATTTCATGTAGCAAGCAATTCGCTTTGTGGTTGAATTTAAAGCTATTCAAAAGATAAGGGATCCTACCTAATGCCGTGAAAATTGGTAAGGGATCTACGAGTAAAAGAGTTT
>c13369.graph_c0
CGGAAAACAAAGCAGCTGACGGCAGTGTAGGCATTTGTACTCTGTAATATTCGTGCGCGTTTAATCTATTATTACTTGCTACCATACACGTTATAATTACTCTTTTCTAAGCATTAACATTTTGTCATCGCCAAATGGCTAAAAATATTTAAACAAAAATACGATATCATTCATTACGCCACCATTATCTGTTAAATCTTCAGTTACTAAGCTCTATGTTACAATTTACATTTTCAAATGTCACTAGTTTTACTCTCTCAAAGTTTTTAATACACGCCAGCGTAGAAAACCAAAATAGATAAAT
>c13371.graph_c0
GGGACAGCTCACTGATGAGGTCGGTGATGGCGTTGGTAAAGGCTTCCTGGGGGCTGTAGTCCGGCGTGGTCTGCACTCGGATGATGATCTTGTGCTCCAAGGGGTGGGGGACTTTGTAGCCAGCAAATAGCACTTGCGGGTCTTTTAGGAGTTGTGATTTAATGATGTTTCCCAGTGTGTGGTCTTCTTTGTTGATGGTGAATAAACAGGCATTGGGTACCTTGGTGTCCTTGTTAATGGTGATCTTCTTCTCGCCCTCGAAGAGCAAGAACGACTCGAAGGCTGGAGGGGCGTTCATGCTCCCGCCGCCGTTGCGTCCAGACCCCAAGGGTCCGCCG
>c13372.graph_c0
AGTCGAGGTCTCTCTATCTCTCTCTTTCGTACACTTCGCGCTTCTCTTCCTGTCAGAGGCGTTTCTCATGGCTCCTCTTACTCTCTCCGTTGATGTGAAGAGCTCTTCAGCGACCTCTCATGATGTTTCGAAGAGGGTAATGCAGAGTTCACAGCTCAAAATAAACAAAGGCTTTTTTGCATCTGTTAATACACAAGAAGATAAACCCTTTGATTTCTTCCGCACTCTCTTTGAGGGGTTTATAGCAGGAGGTACAGCTGGAGTTGTAGTTGAAACAGCTTTATACCCAATTGATACTATTAAGACTAGACTTCAGGCAGCTCGTGGAGGTGGAAAAATTGTTTTGAAGGGTCTTTATTCAGGATTAGCTGGAAATATCGCTGGTGTCTTACCGGCTTCGGCTTTATTTGTTGGAGTTTACGAACCCACAAAGCAGAAACTGCTGAAGACCTTTCCTGATCATTTAAGCGCAGTTGCTCACCTGACTGCAGGGGCCATCGGTGGACTTGCTGCATCTCTGATTCGAGTGCCTACAGAGGTTGTGAAGCAAAGAATGCAGACCGGACAGTTTACATCAGCTCCCAGTGCTGTTCGAATGATTGCATCAAAAGAGGGATTTAGGGGTCTCTATGCAGGATACCGGTCCTTCCTTTTGCGAGATTTGCCATTTGATGCTATACAGTTCTGCATATATGAGCAGCTTTGCTTGGGGTATAAAAAAGCCGCGCGTAGAGAGCTTAGTGATCCTGAGAACGCTCTAATCGGTG
>c13385.graph_c0
GTAAATTCTTGACAGTGTCTTATCAGTTTAGTGACTTAAAACTTTCTGACTTCCTCCTTGGGTGGGTGAGCGAGCACATACTCTATAGCACGGCGAATTGCGTCAGGCATTGGAGGTCCGACAGGAAGGAGATCGCTCTTCGGCTGGTAGCCATTCTCGTCAGCAACGTAGGTGAAATCCACTGGAGTACCATCAGGAGCACTGTATTGAAAAGCACCCTGCACGGTAAGAACATCGACGTCATCAACCCTCTTCAAAGTACCCGAGGACTGAGCTCTGATTCCGTTTCCAGTTTCATAAGCGTAATTGTAACCGTCTGCACCGACTTCAG
>c13409.graph_c0
TCATGAGTACCATTGTTCCGTCAAAGTTACGACTAACCTGTGATCATGTGATATTTTATTGGATCTCTGAAAAATGTTTAGTTTTAGTGTTTTAAAATATTTATTATTTTGTGCTGTTCCAATTTTATCGTCGTATATTGTCGAAGGATCTCAGTCCGTTTTACAAAAAACAGTCGAAGATTTATTCTCAGACAGATCTCAAGTAACTTATCCTGGTGCCTGTAAATGGCTGAGAGCTTCAAAACGACAAATGAAAATGTGTAATAGAGATACCGGACTTTCTAATATTCTTAAACTGGCTAGAGAGCAAGCAATTCGTTCTTGTGAAGATACTTTTCAAAACGACAAATGAAAATGTGTAATAGAGATACCGGACTTTCTAATATTCTTAAACTGGCTAGAGAGCAAGCAATTCGTTCTTGTGAAGATACTT
>c13449.graph_c0
AAATCACAATGCCCATAATGTCAAAAAAAATGTTAGTATTCTTCCCGGTTTTTGAAGTAAACAATACATTATTATAAAACAAAACTTTACAAAATTTGTATTTTACGGGTCAGTAGCCATGCATGTTTCGCCTCGATCTTTGCACATTTTTCATACTCATAACTGTTACGTGGTCCGTCCTTTACTTGGGACACTATTTGATCATACAGTTACATACTTTTTACATTTTACAAATAGAATTTCGTATACTACGTCATAATAATAATGATAATCATGTACATGGTGCAATAAAAATAACAGATAATTTGTTTAAAGTATGCAAAATACAAAAAGAAAG
>c13460.graph_c0
GATTTGTGTAAGAATCTGTGTAATTTAATTTTCATGTGTATATATTAATAAATTTGTGTAATTAACGTGTCACAAAAAAATATTTTTTTCATATATGAGATCGATCAATTTGAACACTATTTGACAGATCAACGTGAAAGTTGGCACAGCTAAGTGTTTTTATTTTACCTATCTTGCGTCTAGATGGCGCTGTAGTGGATCAACTTTTATCTTCTTTAAAAATTTATATATAGAGATATTTGAATGCGAATAATGCAATACATAACAACAAACGCGTCCGAACATATAGAATACATTTTCGAAGACCCAAAATCACTAATATTATCATAATAACTATCAAATCTAGGTTGTGACAGGTGCATTCCGTAAAAAGTGAAAGCGAACCACCGCCTCGAACCCGGACTCGCGTGATTCATTCATTGATAATTTTTCGCTTCGATTTTTTCCTGTTTGTGTGAGCCGTTACAATATCGTCTGTGTATCGTCTCTCGGAATAACCGTTACTCACTTCGTTATAATGTTCAA
>c1347.graph_c0
GGAGCAAAGGAAGCTAGAATTACGAGGTAGACCGGCATTGAACATGACAATACCGATGAGTGTTTTTGAAGGATCTGGAAAAGATCATCATCATTTTGGGCGGGTAGTAGGTGAAAACGGTGAAGAAGTGTTGGATGAAGAGAATGGAGAGCAAAGAGAGGTTCAAGTGAAGGTCCTAGTGAAGAGAGGAAACAAACAACAAACAAGGCAAATGCTAATCCCGAGTGATTGTGCTCTAGTGCAGAGCACAAAACAGAAAGAAGCTGCAGAATTGGAAGAGAAACAAGACATAAAGAGGTTAGTACTCGAGTACAATGAGAGGGATGAAGAGGAAGCAAATGGGTTAGGAACACAGATATTGAATTGGACTTCTGGAGGAAGCAGAGGATCCACTCGAACCGGGC
>c13496.graph_c0
TATGGGAGTAGCCTAAACCTGGCAATACGCGAACTACATACCATACTTATATGTAGATTTTACACTAGTTATAACATTAGTATCCTAAGTTAATATTATAGAGGCAAATGTGGGTTTGTTTGTTACGTTATCAATTCTTACTTACTCAACTAAACATCATGAAATTCTACATATATCTCCTAAGGATTCCTCTAAAATCATAAATGTGACATTTTTTTCATGTTTCGAATCCAAAAACTGGACACTTGAAGCCACAATTTGCTTTTTTATATCAGCTATTTGCTGTCGAATTACAACCTGTTGAAAGTCACCCAAAAATACTGATTTTCTTTTATACCTATCCCTTAATTTTTGTGACTTCATTTTTTTATCATAGTGG
>c135.graph_c0
ATTCCAACCCAGGGATGTTGCAAACGGTATGACCTTCCCTCAAGAACATCTAGACAATCTGTTCCTTTATCCATGATATCAAGCTTGGTTGCAACACCAAAAGTCCTTTCGCCTGTAGGATCAACTTCTCTAGCAAGTTTTATAGCATCTGAGGTAGCAATATCTTGATTTGCTGGAGAAATAGCCAATATGATGCAATTTGGCTTTTCAACATAAGACCGGACCATATTTTCAATGTCTTGGACAATACTTTCCGGTTGTCCATCTACAGCGACCTTGGTCAAACCCGGAAGATCTATGAGCGTCAGATTAACAACATTAGGAGAATATATGCTCAGCTGAATTGGAATGTTTGAGATTTGTTTTGACTTCCCAGTAATACGATCAGTTTCATCCTCAATTTCTTTCCGCACAGCAGCAAAATCAGCAAATCTCTTCTTAGGAGCATGAAG
>c13545.graph_c0
GGAGTTGTCATACACAAATTGGGCATCCATCACATCATGCATAGTAACCATGTTATTATTCTCACCCAAAATCCCAGACCTAACCCTCCTAAGCTCCTGCATATGCCCACCAACCCCAAGAAGTAAACCCAAGTGAACACACATAGTCCTAATGTAAGTACCCGCCTCACAAGAAACCCAGAAAACAACCAAATGCCTATCAGCATCATACTCAAGCAGCTTGCTTTCATAGATTGTCCTAATCCTAAGCTGTCTTTTAACAGCAGAGATCAAAGGAGGCCTCTGAAACACAGCTCCAGTGAGCGATTCAAGAGCTCTAGCTACTTTAGCAACATCAGGGACAGCTGAGTGAAGCCGAGCAACACAAACGTACTCTTTACCCGCACCTTGCTGCGATTTCACAAGCCGTGTGGCTCGGTCAATACAGACAATGAGGTTTCCAGTGACTTTTGGGTCAAGAGTACCACTGTGACCGGTTTTCTCAACACGGAGGATACGCTTAATCCAAGCAACGACCTCGTGAGAAGAAGGGTTCGCGGGTTTATCGAGATTGATGACACCGTACCTGATATACTCTTGAAGAGGACGTTTCAGAGGAGAGTGACCGGCGCTGATTGGAGTGTAGTGACCGGTACGGACGTTGAGGCGGTCGTAGTTCTTGAGGAGGATGGGCCACTGAGAAGTGTCGATGGCTGGAGTGAAACTCTGTGGCTTGATCATGTAGTCTCCGGTGTCGGCGGCATCGTTCTCCGTTTTGTCTTGCTTCTTCTTCTTCGAGTGTGAGATGTCGACCTCCGCCATGGCTCCGGTCGGATTAGGGTTTTGAAAAATGGAGGAGGAGGCG
>c13546.graph_c0
AAAAATTTCTTTTTCTTATTAAACACTACACCACTATCTTTTATTTCTTTAAACTCCTCTTCTTTTACAAATTCGAGTTTAATTTGTTCCTTAGGAATTTCAATTTCTTCAAAAGGCATTTCACTAAAAATTTCACCTTCTGAAGACGAGTCGTCTATTTCGAATTGTTCAAAATTTTTAACGGATTTTTTTTTATTTTTTTGCTTAAATTTTCCGACTAATTTTTTTAAAATTTCTAAATCATCTTTTTGTTTTTGATCTGCGTAAAGGGAAGCAGCTGTATTTTCATCTTCTTGTTGATCATCGACTATGCTTGAAATGTCAGAACCATCATCTTCATAAGTCTCGGATTCTTCACCAGATTGTTCTGCTTCTAAATCAAGGAATTTTAAAGCTTTACTCTTATTTTGTTTGTCAATTTTAAAAGTCTTCACTTCGTCAAAATCTTGTTCTTCACTGTGTCTGTCATTCAATATATCCAAACTATCTCCTTCTTCAGATTCACTAAGTAAACCACTTATGTTTGTGTTCTTTATTTCTTGTTCTATACTTATCTTCTTAAAGAGAATATCTTCATCTACATTTTTTCTATTTAAAATTTTATTTCTAATTTTCTTTTGAACGTGTTTTAATTTTAATTCTTCATAAATTCTGTCTCTATAGTTTTCTTTATAAATGGCCATTGCTTCTTCTGTTGTATAAATTCTCCTAGAGACTTTAGGAATGGGAATATCTGAAATGAACTTGGCGACATCTTTATCTAGAGACATTAAGGG
>c13565.graph_c0
GGGAATATGGCAGAAATATATGGTAGCTGCAGTGCAGGGGGTCCACTGGAACCAGCTATATTTTAAAAGTGGTCTTTGAGACATAAACTGTGGGAACCTCTGGTCTATTCGGGATCTAGTCTGGAATATGTTGATAACTATTATAGCACGGATGGTTCAGGTGAGGAAAAGTATCTCTGTCATGGGTCGTAACCCAAAAAAGTGTATGCATGGAATGAAGTTTCTATAAATTACCAAAATGACACTACTGGTAGCTCTGCTGTCAAAACAAAAGAAAACACCTGTGTCGTTTTCTGTATAATTAAGTTTTATATACATCAGGAAAAAAGCGTATTTAGCAGAATTATTTTGTTTATCTACAAGCTTCTATTCTCAAATTACACTT
>c13595.graph_c0
TAGTCGATGTAGCCAGTGCTCTCGATGCGCTTTCCATAACCTGAGTCATGTCCTTGGGATTGCTCCAGAGCTCATTCACAAGTTGTAACCGCCTGCGTTTGGAGTTAATCGCAATCCCAAACTTGTGGTAGATTCTTTTCCTCTCTTCTCCTGAAAACCTTTTCCCCACAAGCTTGCTCAGCATCTTTCTCTCCCTGTGAAGCTCTTTCCGGCTTGAGGCCAATGTTAAGGTTTCTCCTCCTTCCAATGCTTGGTTTCCCTGAGAGAAGCTATCTTTCATAAACAAAAGTCTTCTTAGCTCTACTCCGATGTAGATTGAATCCGCCTCATCTCCTTTGAAGAGCAAGTAAAAGTATGTTCTATGCACCAAAGAGATGTTACAAGTTTGCCATAGCTCCAGAATCTCTTGCCGCTGTCTCTCAAATTCTCTGTCCATGGAGTCCAGACCAATGTCCCTCCTCATTTTACCAGAA
>c13620.graph_c0
GGATCGCCAAATCTGCCACGGGATTCTGACGTCATACGAAATTGATGTTGTCATTGATGACGTTATCAGATTCTTGTCGGAGACTCACTCGGAGATTGTAATCCTGGAGATAAGGACTGAGTTTGGACACAAAGATCCTCCGGGGTTCGAGACTTACTTGGCAGACAAGTTAGGTCAATTCTTGATACATCAAGATGATAGCTTGTTCAACAAGCCGGTATCAGAGATTTTGCCGAAAAGGGTTATATGCATCTGGAAACCTAGAGAGTCTCCAAAGCCGAGCCGTGGTGGAATTCTCTGGAACTCAGATTATCTAAAAGATAATTGGATCGATACGGATCTTCCATGGACGAAATTTCAGAGCAATTTGAAGCATCTGAGTGAGCAGCAGCCGACATCTTCTAGAAAATTCTTTTACCGGGTTGAGAACACGGTCACGCCGCAAGCAGATAATCCGGTTGTGTGGGTTAAACCGGTGACTGATCGGATCCGAAAACACGCCAGACTATTTATTTCTCAGTGTGTTTCCAA
>c13640.graph_c0
GGCGGCTAAAGGGGAGAAAAGGGTTTACGAAATGGTAAACGTGTTAAGGAATGATCTGTCAAATAAAAATGTAATAATATGATGGAGCGATCAACAAAAATTAATTCTTTACTGTGGTTGGTTTAGGTTTAGATGCCTACATCCTAAATTCGAATCTGCATAAAAGACTACTATACTAATGTATAAGATGATAATAGATATAACTTTTTTGGTCGAATAGTTTTTACTTGCGACTTCGCACGTATTAATTTAGTAAAAGAGATTTTTTATCCCTCGGACTATTTTCTGATGGAAATGTCCTTGATGTGTCATTTCATATGTAGTATACTTTTAAATTAATAAGAAATCAAGTAAGTACT
>c13644.graph_c0
GTGTGGAAGGAGCGCAGCGGAGTTGTGTCATGTATCTACGAGTATGTGCACTCACACTAATGCAAAGCCCAGCTCATAATTCAGTAATAATTAATAATAATAAACAGCTTCGACGACTGGGAACATATTTTCTTTATTCTGGCTAGAAATCCTAGTTATTTATTATTATTTTCAATATTATCAAGTAAGTAATTATGTCCTATAACAAACTTCGATAATTATAATTTATTGTACGATTATTATTGTGTAATTATTCGACACTTTTTGAATCCAATTTACACTCAAAGTTTGGAAGTCGAAATAGTTGCTAGCGATTTGACGCTAAATTGCATTGAAAATTAACGTCAATCTACTATTACAAATGGATGCCAAGTTTACCACAAATCGAACAGAG
>c13653.graph_c0
AATGGTTGTTTGTTTATCAACAAGGGAGGATAACTAAGTTAGTGTTTATGTATGCGGATACTATGTTGATTGACATCATTTCAAATCCCAACAAGACTTGCAACATTTGTTTAAGGCAGATGTTATAATGAAACAACAGTATGGTTTTTTCTGGGATTCCTTCATTAACCCTCAAATTAATAATCACTTAAGGTGTTTTAACAGCTGTACTTAAGATTTTGCTCTAAATTTTGCATATTTTCTATCATAGGCTACATCCTCATTAAACATTATAAGTCATCATAATCGTAATCACTAAAATAAGGAATAAAAGTGTGGTGAGAAGTTCTATCAATGAGACATTTCTACTTTGTTGTATTTTGCGATTAGCCAGTGTACATACAGCTGTCAACTAGCTTGCAGGGTTCACAATAGTAATAATTGCAGGTGGATAGTGTCATATTATGTCTCTTTGTTATGCTAGAATAAAAAGTAAGCATGGTAGGGATATCTAAAAACTATATAATCACAGTTTCTTCTCAATTTCAGACAAATTTCTCAGTTGATAAT
>c13676.graph_c0
GCTAACGCTAGTGAACCCGTCTTGTGTTCCCATTACGAAGAGTTTGGGTTTAGGGGATGAGAGAATGGCCTTGTGGTGTCGCCCAAAGAGAATCGAGGCCATTAGGCCAAATGGGTATCCCAAACTCACATATCCCACCACTTGCTCTACTTGCTCCACCGCTGATCCTGCGATTGGTGCACCAGCAGAAGAACCCACGAGCAGGATCCTATGAGCATCAACATTCTGACAAAGCCACCGACAAACAGCGACCACATCCTTGACCTCAGCAAAGCCGGTAAGAGTAGCTCTTCCGGTGGATTTTCTGACACCTCTTCGATCACGAATCTTGTGGATCGTATGAGAAGAGAGACATGATAAAAAAAG
>c13680.graph_c0
AGTTACTTATATAGACGCGAGAAAAATAACAACGATATACTTAAAGTTCCAGAAGTACTTAGTATAGTCTTTTTAGCCGCGCTCAAGGATTTCGAGCTGTGGGTTTGCTAGTCGCATCGCTGTCAGCACAGAAACCTAGGTGCAACCATCGCAGTACTTTTCAAAAATTTAATTTCGCAACAGTTTACATTCCAAGTTTTGCGTATTTTATAATTTATTCAAGATTATTGTCATTCATTGTTTTCAACTCGTAATCGCCAACAGCTGATCATAGGTCTCTCTTCCTGTACGTCACTTACCAGGG
>c13732.graph_c0
GGAGCTAATTCTAGACAGGCAACACTTGTATTGCGATAATAACCAAAATTATATAAATAAGTTATGAAATAATACTGAATACTACTGTTACTCCTCAGATATCCTTGAAGAATCATTTCGTTCATTTCCGAAAATACACTGTATATCCGCCTCACAACGGATACGGCAAACTGCATCGCCAGGCTTTCGACGGGCCAGGATCCGACCTGTAAAACCGCCTTGGTTGACCAGGCAAGTCTAGGTCGGCTGTATTTGTTCCACGGCGCACTCGTGCACCTTGCACAATGGCGTCACGCAAGTTTCGACTTGATATCCGGACTACAATAGGTCGGGGACGGCTTTCGGTGGGCCCAGACGACTGTGTGGCGTTGATATGCCGACCTCCAACTCGACTGACGTTAACAATGTCGCGATTCTCTAGGCTGACTCCCAGTTTAGTAGCGACCAATTGTATCGTATGGGTCAAGTTTTCACCACTACATTCTGGAATATTAGTGATTTCGATGTCATTAGCGAGAAGTTCCTGATCCCGCTCGTTAATGTCACGTTTGAGCTGATCAACAACCTCGTCAACATTCGAAATAATAGGGGTCTGTTTGCCTAATAGTTCCAAGTCGTCTAGTCTTTTCTCCATTTTATCCACGCG
>c13746.graph_c0
GTACAACAATGTATTTATGTTTGTGTATAAATAAATGTAATTATAAATTATTTGTTGATGTGTTTTTGTGTTGTCCTACCGATCTGTTCCATTACATTGGATAAAACAGTTGTTAAATTGGTTTCGCGCCATTTTGTCGCTGTCATTTCGTGTACAGTATAGAAAATAAAATTATCTAAAATGCCACACTTTTGTAAAAAATTGAAATGAATTAGGTTCATTGCTATGTAAAATTGATTTTAGTTTCATTGTAATATGGCACAACAATAATTGTAATAAAAATCTCACCAATAAATGCTAAATAAGGGCAACTGAAAGTTCGAGAACTTTCAA
>c13748.graph_c0
ATTGCGCCGGACATGGGAACAGCAAACTGGAGCTCGTACATAGCCGGAGTATTGGGAGAGAGAACAGAGACTACGTCAGACCTGCCGATTCCGATTGAAGACAGAGAAGACGCCACGCGGAGACAACGGAGGTTTGTTTCACGCCACGTGTAAACGGTGTTGCTGCCATAAACGATGGAGGTACAGTCACCGTAAACGGTGGCGGCTCTCTCTAAGAAACCTATCGGCGTCAACGGCGGCGAGTTTGCGGCGCATGGCTTCATTTGCTCCATCTTGAGTGGTCAAATGTATTGTTTTCTAATGTCTGCTCCTTATAAATTGAAAAACACTTATCTATAAGAGAAAAGAAAAAAGAGTTTCGTGATTATCTAGGACACCTTGGTGATGACAATGGAGATAAGGTTGACAAGATCGGAA
>c13757.graph_c0
ATCCCTGAGACGTATTTAAAATCTGAAGATACAGAAGGTCACAATAATGAAAATACAGTACTTAAAAAAAAGTTGCGACAGCAGAGAGCCTAAGTAAATTACTTGATCTATTGATCATCAATGCATAAATGTCTCTTCATGTTACGTTTGATGGAATCTAGGTCATAGAAAAGAGGTGCAATACCGGCCGTGAGTTTGTTCTAAAGTTTTACGGTACGGCGAAGATGAAACATGACGAACTTTGTTTTGCATTCTTCTAACGTGTTCGACAAGTAATCTATCTATCTCTCTTCTATACGTATATCGTATATAATTTAATTACAGG
>c13848.graph_c0
GAGTGTGTGGTGGGAGGAATCGATTTCTCTGAGGATGAGTGAGAGATGTTGAGAAACCAAAGAGACATTGTTGGAATGAAGAGGGTGTGGCGTGTGGGATTGAGACCGAGACGAGAAGGCGTATAGTGCAAAGAGATTTGTAGTGACTATAGAGAAAAGCATAAGGAGGTTGATAGCTGAAGAAAAAAGCGTTGATCGCTTGAATCTTGCGGTTCCATCGCCAATCTTCAGCGATACAGATCCCATACTTCAATGTAGCTTATATTGCATCAATTCCAAATTTGTTCCATATTGTTGAACCTATGATCGGATGAGAGATCCAGTGACCTACTCTGATTCAGCCGATGAACATATCGA
>c13849.graph_c0
TCTGTTTTAGGACATCGGGAAATCGATTCTGGAAAGCTATTCAAGAGTTCTAGAGAGCTTAGCATTCAACATTGTTGCACGCATCGATGATTTGCTCTTTGTTGATGATCTTACAAGACATTCATCGGATCAGATTCCTACAACATTAGGCAACAACGGGAATGACGCTCCTAAGAGCATTGCAGTGCCGGTTTCAAACTACACAACTCCGAGCTACTCGCCTTCAAAACAGGAGCTTCGATCATCAATTACAGTTCCACCATCTCCCTCCCGGTTCAAGATTCCTCACAGTAGCAGTGTTAAAAGGGTTTTGACAGCTTATGTAACAAAGAACGAACCAAGACTGAAGAATCTTCCTTTAGAAAGATCGAGC
>c13851.graph_c0
GGGCACCTTGTTGATAAGTCGACTGTAATCTTCTCCAAGCCAATCGTGGACGATTGCTGGATTGTTTTTTTGTCGTTTTCTTCTTCGGTCGTGACATCCTGATGACCTTCACTAATAAGACCTGTACCTGACGCAACAACTCCGCTATATCGGTCTCTATCGAAGTACCAACGTTCGCATATGCCGACGTGGAAGGACTTGCAGATGCCACAAGTGAGCTCATTGTCAGAATATGGTGAAGCTTGTCTGCTAAATCAGCTGATTCTTGCAGAGTCATGTTCAATTTCATTGTGAAGCTACGATCTGTTGGATGTTGTTGGGCAATCTACTAATCCATATTGAGCGTAGAAATACCTCCGCAACCCCAAATTCTGCCAGGTTCTGGAGATGATGAATAAATTGTGACGGTTTCGGGTCCCCCAACTCTTGAGTCCAAAGTTGAATCAGATTCTTTTTCCAGGACGACGATAATCTCTTCACGATCTCCGTGTCCAACGGCTGATTAAGTTTACTAGCCGACGGAAGTGCTGTGACTACGTTATTAACTTCTTCTGGGGACTGTGGATACAGCTATCCCG
>c13858.graph_c0
GCAGGCAGAAGCTAGTAGATCATAGAATTAAACTATAACGTTCGTAATTTTAAAAAAAACAGACATATTTATCAATAAACAACTGAATTACAAGTCGTTCATTGTAATATTACTAACAAAACTATAATAGTTACTCCAATTACCTTATAAAATAAAAGGCATATTTTAAATATTTCTTGATACATAAAACACGAATGACATGCACTTAATCGCCTTAAAGTAAAGGAGCGTCCATCCCAGTTTAAGTGAATTACCTGAAACAATAAAAAAGCATTTTAAAGTCAGATGAAATGAACCAAACACGCTTATTAACATCACATTTAG
>c13882.graph_c0
GTGCCACGACGACAGAGTCGATAATAGGAAGTATGCTTTTACTTATTATTTAGAAGATTATCCTTCTGGTTCTCTCATTTTGTATAATAATTCTTGCGATAAAGAAATCAAGAGATTAGAAGTAAAAAAGAATAGACTGGTCATTTTTGAAGTTTCAGATATTTCTTGGCATGAGGTTGGTTATTGCAAATCAAATGGCAGAAGAGCTTTTACAGGATGGATTAATCATAAATCTATTATACACACGTCAAATATTTCCAGTACATCGAGTTTAACCTCTAAAATTCCTGATAATATTGGTTATATTGATTTTGTGTTGTCATTTGACGAGTCATCTATTCTTCAGTTTCCTGGTCTTGAATATGATTTTTCTCACTCTTGTAAACGAGAATCTGGTCCTTTTTACATGAGAAAAGTCTGTGAATTAGAATTAGTACAACCGATCGGTCTAATTATAGATGATTATACTATGATTTACTTCCAAGCTTATGAATTTAAAGACTTTAATTATATTTTACTAAATGATTACACAAATACAATTGCAACAGATAATATAATTGATATTTTAATCTTAGAATGTGGAGAATGTGATGACGACTGTTTCAAATTCTTGGATGAAGATGGTAATCCACGATTTGCACTTCCTTTACTCAATAAAGTCCTTTACGCTATCAAAAGAAATAAAATGAAATATTTTATAGAGAACGCTGCCAAAAAGAATTTTAAGATGGTTCATATGATTTATGAGAAAAACAAACAATAAATGTCTTAATAAGCGCCTTTATATCTATAAAAAATTATTTAAAAATGTCATAAATGACTGACACAACTAAATTATAAAACAAG
>c13898.graph_c0
CTTGGCTCAACTGAACCTAAGCCATGAAGATCTAGTTAGGTTGCTTCATTCCTTGTCATGTGCTAAGTACAAGATACTCCTTAAGGAGCCAAACACCAAGACTGTCTCCCAGAATGATGCCTTTGAGTTCAACTCCAAATTCACCGATAGAATGCGCAGAATCAAGATCCCTCTTCCCCCAGTTGATGAAAGGAAGAAAGTCGTTGAAGATGTCGATAAAGACAGAAGATATGCAATTGATGCTGCCATTGTCAGGATCATGAAGAGCAGGAAAGTATTGGGACATCAACAACTTGTTTCTGAGTGTGTTGAGCAACTTAGCCGAATGTTCAAGCCTGATATCAAAGCGATCAAGAAGCGTATGGAGGATTTAATAACCAGAGATTATTTGGAGAGG
>c13911.graph_c0
GGCTTCTAATCGAGTTTATGTCAGTCTCGCTGATTGGACGATATTGATCTGGGAGATAACAAGCAAGAACAGCAACAGCTGCTTCTCGGTAAGCCAATCTCAACTTCAGTTCCTCTGGAACTTCAGTACTATCTTCTTGTCCAGTCTCAAATGTCCCTTTTTGCCGCTTAAGCGCCTCAAGGAGTTCTTCTCTTCCAATGTAATCCAAATCTTTTCTAGCTGTCAAGATTCCAGCTTCATTTAGAACGTTTTGCAGTTCTGCTCCGGTAAAATCTTCCGTGTTCTCAGCTACTTCTTGCAGCAACTCCTCCTTCTCATCCTCAGATCGAAAGAATTTATTTCTAGCATGTACCTTTAATATCGCCAATCTACCATCTTTTGA
>c13921.graph_c0
TGGCGTTAAATAGATTGGGGGACTGGATAGCACAGGTAGCTGAAGATCGGATGGCACCAATAGCATTGCTTTCCCAAAAAGACACAAACATAGCACAAAAGGCATTATCCCAAACCGTGGACGGTATACGTACTTACTTGGAATATAATGTGCCGTGGATGTTACATGATTTATTAGCTAATGAAGCAATAAGAGCACTAACACAACTTTTGGAAAAAACTAAACAATCATTAGGATTTCGTGGATGCATGGGTAAATTTGTCACTCACATGAATGTGATAATAAGAATGACAGAAGTACTATTTAATAAATACTTAACAGTTGTGTCTATAGATATTATACCAAAAATGTTACGTCAAGTATTTTATTCAAAATTGTATATGCTTCACGGA
>c13938.graph_c0
AAAGGAGAGGTTTAAGCGCGAATTTGTTGTCATAATAAACCTTTAAGGCTTATTGTTTCTGTGAGAAATACTCGGTGGCAGCAGGTAGGCGACAATCTACAGAGGGATGTCAGGAGGCGCAGTGCGGCTGCCGCGATGCTGGATAAGAGCCGTCATAAGATGGCGCGTTCTTGGCTCCTCGTCCGTCGTCGCGTTGTACTGTATGCGCGAATAAGCGCAAATCGTGCGATCACTGCGCAAGCGCGAGTGGCTCTATGCATGCAGCTCGGGTCTCGTGCGGATAAGTAGCAATTCACCTTTATCAAGG
>c13952.graph_c0
AAATGGAGTCTTTTTCTTTGGCAACACCAAACATGTGTTTCAGGAAGGTGAGTAGTGAATTAGACAGTTCTTTCAACGGTGAAAATGTGGTTTGTGGTTTGGAACTGGAGGAGAAGACTGCAGGGGATAGGAATAGGATACATTTTCTAGAGGAGCGGAACGAAGAAACTTTATCGAAGAGGCTTCGGAAACTTAGCAGGTTGGATAAAGTCAGAAGCGCATTGGAGTTGTTTGATTCTATGAGATTCTTGGGTTTACAACCTAATGCTCATGCCTGTAACTCTTTTCTCTCGTGCCTCTTGAGG
>c13955.graph_c0
TTAAATGAATTCCTAAATTAAATGAATAATCTAAAGCAATAAAATGTAGAATGTAAATATGTGTACACAACATCCTCATCTCTATCATAGAATCCTCTGGACTCTACCAGTTATGAAAGCATTTAAAACAATACAAAACTTTCAATATTGTTTTTAATTTGACTTGTTTAATTTTTATATTACTCGACTACTTTAATATAGTGTTAAGAAAAAAATTAATGTAACCGTAAATACAAACTTACTTATTGTTTTTTGAACTTTATTAAACTTCATCGTTTTTACGATTTTCAATGTCCTACGCTTCGATCGAAAATAACTAAATAAAGGGTCACG
>c14.graph_c1
GGGCCTGACCCAGACCCTCCCTTGGGACCCTGAGCCCCGAAGCCCCCAGGCCCGGGACCACCGGCACCCTGGTACAGTCCGCTGATGATGGGGTTACACACCTGCTCCAGCTCCTTCCTCTTGTGCTCAAACTCGTCCTTCTCGGCCAAGGTGTTGGCGTCCAGCCACGAGATGACCTCTTGACACTTGTCCAGAACCTTCTTCTTGTCCGCCTCGCTGATCTTGCCCTTGAGCCCCTCATCCTCCACGGCGCTCTTCATGTTGAAGGCGTAGGACTCCAGGGCGTTCTTGGCTGACACCCTCTCGCGCTGCACCTCGTCCTCCGCTTTGTACTTCTCCGCCTCCTGCACCATGCGCTCGATCTCCTCCTTGCTCAGGCGGCCCTTGTCGTTGGTGATGGTGATCTTGTTGGCCTTGCCGGTGCTCTTGTCCGTGGCCGTGACGTTCAGGAT
>c14027.graph_c0
TACGAACAATGTTAATCATACATTAATACTTTTTAAATAGATGTTGACATCAATGCTTTTCTTGTATTTATCCCTTCTAGCCCTGTCTCTTTTCTATTTTCCCTTCTAGCACAGACATCCTACTGCCCTGCCTAATACTTTTGAAACCGATTTAAAGTCTGCATGTGTCCTGGAGAATTGTCTCAATAGCCAGTCACCTAAATATTAATTAGTAAGTAATCAGTTTGATACATATACTGATATTTTTATACAATTTTCAAATGTATTTAAAAGTAGAACCAAAAATACCTATTTCTGCTACAG
>c14034.graph_c0
ACCCGATAACCTTTTTACCCCTTCTACCCGCTCCCGCAACCGCTTTACTGGAAAATTGGCCTGCGTCTTTAAGAATACATACAATGTTATTATATACATGTTGTCTAATACTAGTCTGTGATTGGCATCCTCACTTAAACCTTCTAGCACGTTCTGTAAATTCAGTCGGGAAATGAATTTACGTTCGCTTAGTGTGACATCTTTCTTTGTGTATACTTATTTAACTGGCGTCCCGTTTATCCCATATTACAACACTTAGATTGCGAGTCAGAATTATAGATGTAATTCGGTAGGTGGTAGAGCCACGCT
>c14043.graph_c0
GTGGTCAGGTATTGACTAATGCCGAACTAAATACCTATAGGTGTGTACTGGGAGTTGCAGTTGAGAGCCCACATTATCATTTAATGTATGGTGAGATTACAGTAAAAAACTAGATATATACAGAAATGCACTGTAAAGAATAATCAATTTTTTTTAATGACCATTTTAAAATTCCCTATTTTATTTTTGTATATTTTGCCATGCAAATCATAAAGGCAGTTAAGAACATGTTAATGGTTTCGAGAAAATGCAGTCAAATTTGAAATAGTAATTGTTGTTACCTGCAACTTGTTGTGCAAACATTAAATTAAACATATATATGT
>c14064.graph_c0
CCTTTTATAATTATTATGTTATCTTTATCTGTGACGTATATGTGGTGTCAAATTAAACAAGGGACAATGAATCTAATCGATGATAGAATAGCCAATATTGATTACAATGTAAAGAATATGTTAGGGATTTAATACTTATTTCAACTACCCACATTAAAAAATAAAAACAAAACTTGAACCAATAGTGTACTACAAATAACAGTGTAACTGTTGAGATATATTTTTCGTTCTGCTTCATGATCAAGAACCCAGTTATTGTTAAGAATAATATACCTCATATAATCGAAAGTGCCGATGTCGGTTGATATCGACTATAGCTTCTGGTACAATAGAGTATAGAGGACTCACGGGACTAGAGGG
>c14092.graph_c0
ATCGGCGAGCGGCAGAACCTAGCTGTTTTAGGTAGCTTGCTGGATTCCGGTGTAATTCCGCTATCTGCCGCTACGCGGCTACCATCCGAAATTAATTATATTTATATTGAATTATCATGTATGGAAATATTGACTTCTTGAGTCTTGGTCGCAGAGCTTCGGGAGTGGGGGCGTTGTACTCGCATGGGAACCCTCTTCCAGAATATCAAAAAATATTCCAGGATTTTGACAAAAATGTTCCCGGATTTCCTTAATATTAAGTTCCTTATATTTCCAAAAGTAATAAATATAATTTAAAATTTGAAATTGTATGACCTTTATTTCCTGGACCTAGAGCTCCATGCTGAAAACCAGCTTCGCGCCACACGTATTTCCAGAGATATTTAATGTTAATTTTCCGAGTCGTAAATATTTTCCAAAAAAAACTTTTTTATTTTTAAGTTTATTTAAGTTATTTTTCGAAAATTGTATAAAGGCTAGCCA
>c14096.graph_c0
GCATACGTCTCAACGCCACAATGACGTACTTTTACATAGTTCTCGCGTTGATCACTATTATATACTTAATATATTTGTATTTCACAAGAACTTTTAACTATTGGAAAAAAAGAAATGTTAAAGGACCTCGACCTGTCCCGTTTTACGGGAATATAATGGAATCTGCTACACGAAAGAAAATAGCGGGTGTTGTTTTTAAAGAGATTTACGAGAGTTTCCCTAACGAGAAAATTGTTGGCGTCTATCGCATGACGACACCGTGTTTACTAATACGAGATTTAGATATTATTAAGCACATAATGATTAAAGATTTTGACGCA
>c14120.graph_c0
AAAAAGTAGTCCAGAATATATGAAATATAACATTCGTATGTATAATGGAAGTGGTGAAATTTTTCCTGAAACAATGAGTAATATTGCAGCCAAACTCAGATGTTGAATAGTTATCTCTGTAGATATGGAACTTTAGAACCAAAAATCGCATTTTATATGGAATATTTCATACAGTACCACCTGTATATTTATGTTTAATTAAGTAAAAAAACGAATAGAAATACTATCGAATTTATAGTTATATGAAACTATTAATTTATGGTATTCAAATTTGATAATAAGAATAAATTAGGAACACTATTTTTTATATGCATATTTTTGTATACGGGCTCTAGTTGTAACTATGAATGTTTCCATTTTTCTAACGTTGTTTATATCCACGTAATTATTCTATCTAATTCAAAATTACCTTTCTTAACTTTAATGCTCA
>c14122.graph_c0
GGTCGTTGTATGTTCACAGGAGCTTAGATCACACTCGCACATTAAGATATCTGTAAACATTAATATGTTCACACACTTAAACGATCATTAGTGACAAGGCAGTCATATACCTTTACTTTGTGTTATTTTCTTTTTAAGTACACGTTTGTATTTTTTCAAATATACATGTACATTTATTTATCTAGTCGGGTCATAAACTCTGTCATAACGTCGTTATTTGAAATCTTCGAATACTGACCAAATATACTTCTACTAATTTTGAAAATAGAACGTTAGTGCTACCAGAAAATAAAAAACAATTTCACTTTTATTCAT
>c14133.graph_c0
GTCTTCTTAAATATTCCAGCCCAAAAAAAAAAAGATTCTATCCATTATCAAGAGAAGAAAAAAAAATCTGAATTCCAATTCGAAGAAGAAGAAGAAGAAGAAAGGAGATGACTATGGGGAATTTCTTAAAGAGATTTGGAAGTGGAAAAAGCAGAAGCAGTAGAAATATGACTCTGGGAACGACGTCGTCTCAATCTCATGAACCATCACCGTCGGATCCTTCACTCTCCCTTGCCGATAATACCAACGCCACCAAGAAGAAGTACGCTCTCATCCCTGACCGCTTCTCTTCCCTCGACCAGGTATCAAAAGCTCTAAGAGAAGCTGGTCTTGAATCATCCAATCTCATTCTCGGAGTTGATTTCACAAAGAGCAACGAGTGGACTGGGAAAACTTCTTTCGATGGAAAATGTCTGCACGCG
>c14154.graph_c0
GGGGCCCTCTTCCTCAAGCCCATACGTAAAATAAGAAAAATTACGTCTCTGAGATAGGAGGAAAGTCTACGGCAGTCATACATGAAGAATACTTTAATCTGAATATACGTGGGGCTATTCAGAGCTAAGGTATAGCAGATCTGCTTCGTATTCAAATGTGAAGAAATCGCAGTCCAGTACGCCTTATCCTATGTAGTAACGGCGTATGAGGCTTTTCTACCGCAACTGCGAAACCCGCAACTTAGGCTCAGGATGAAATACAGAATGAGGTTACACTAGTGACATAAATCGTTCCACCTATGATTGGTCGAGATTGATGCTCGGCTCTGTCTATGTGCTCTTTC
>c14180.graph_c0
GTCACGAACAACATTGTGTCTGGGGTCAATCATGAGACATTCATAGTATTTGAATGTAGAGTCCTGGGCAACCCAGTAGCTGTTCAACAAGCGCAGGCTACCAAGTCTGCGACCACAGCGTTCCTCTGCCAAAGCCCGCAGGTTGCGGACTGGTTTCAAGTGGTTAACACCATGGCTCTTGGGCTTGCCATAGGTGCAGCCCTTAGGGACGGGGCGTTTGCGGCCTCCACGACGAACACGAATGCGGTAAATGACAAAACCTTGCTTGGCCTTGTAACCAATCCTCCTGGCCTTCTCAGGACGGGAGGGCTTGGGTACTCGCACCATCCTGTTCACCTGACGATACTGCCAGGCACGAATGCGGAGCAAGAAGCGCATAACATCACTCTGCTTCTTGCGATAGAGTTCTTGCATATACTTGTACGCACCCATGGCGACGTTTTCTGCAGGGCCTCGCCCTGACG
>c14204.graph_c0
GTTCCTGGAGCAGCGTGAGTATATATAGTAATCCAACGGTTAGTATTAAGGTCCGTAATACTAGTAATAGGGTACCTGACACGAGGGTACGTGCCAAGTACCCTAGTACTAGTACCAGGTACCTCAGTACTAACCCTTGGTCGGTGGTCGGTAATCTGTATAGGAATTGGTCGCGAACATTATACACGTGGTGAAAAACCCTTTTCTAGGATACTATGTTCCAGTATCAAGCAGCAGACGAGTGGCATACAGGTTGGCATGACAGTGACAACTACTAATTGTAGACCTCTGGTTGGTCGCCATCGTTTTTGTATTTTAGTAGACATGGTGACGTCACTGTGTTCTTTTAAAAAAAATCTGAGAGTTGGC
>c14206.graph_c0
AGTAATAGGGAAAGTAGAGGAGGTCTTGGGACCCCAAAATGAAGTTTATGTGGCTATCAAAAGAGAAATTAAAGAAGATTATGATTTAAAATCTACTTTTTATTGTTATGAGAATAAGTTTATTCCTAAAGAAAGATTTATGGAGAGGAGTGAAGTAGAAAAAAAGAAAGAAGAGGGGGATAAGAATAAAAGCGTTAAGAGTAGCAGTAGGGTTAAGAGTAATAGGGGTAATTTTAATAAGGTTAAGGGTGATGGTTATAATAAGGGTAAGGGTGATGGTTATAATAAGGTTAAGGGTGATGGTTGTAATAAGG
>c1421.graph_c0
GGTCTGGCAAGATGGGATCCTAAATAAATTACAAACCCTTACGAGATAGAGAACGTTCCTGTTGCCACCGTCTTGAAATGTATGATTTATAGTTTAATATCAAAATCCGAATAAGGCTTCGAGGGAACGTGAAATTTACCATTAATTACTTACCTATGCTTGTGTTATGGCGCCTTTTTCTGCTTTATTTTACATATTTTTTCGATTGATTTAAACACTATTGAACGTTCACTTTTAGTACAAAGATGTGTTTGTGTCCTCAATGCATTCACTTCTAGTTAATAAGTGATAATATAAAAATGCACCTTAAGCGGTAAATTTGTGCAGT
>c14211.graph_c0
GTGGTTTGGTCAGTGGTTTGTCAATTCGATGTCCGCAGGTTCAAACACCGGTGTGTATCAACGTATTATCCCTATCACCGTGATTTTAGTTTCATCATGATGAAATTTTTATCTATATGAATTTCTTTGATTACAATCGCATTTGATGTCAAACCTTGAGGAAGACTGGCTCTTAAATGCAGTTGTCGGAACACACCTATAGGTGCCTTGAGGTTGACTTAGAAAAAGCCCTGCCTACTAAGTTTCACCACGATGTTTTCCATCATTGAAAGCATCGGTTAAAAGATTCGTGAATTTTCGAACCTAGATCGATCTATGCAGTATCCGAACATATTATCCACTGAACTATTATCGTTTTAAAACAATACGCTGGTGAATATGTCGTCAAAATAAGATATTCACATTTTTACATAAATGTAAAACGAATGAGTAAATTTAAATGCAGAAACAAAAATATTCTAGGAACACAACAAAGCGAAATAAAGTCACGAATTCACGATCCAGAGACGCTTGAAGGATGATCGGAGCGAAC
>c14242.graph_c0
ACGTGCTTTAGGACTTCTAGGATTAGCGTGTTTACTACCATAGACCAATCATCGTTTAAGATCAGTTGAGATTATGGCCAAGCGCTAAAACCTATGCAATACAAAAAATTATTCATTGTTTAGTTCTAAGAACTCATTCGGAATTGTATGTTTATCTAAATTAGAGGTATTGGAAGCTTTTATTGTTGTTACTGGTTTTTTTTTCATAGCTACTTATTGAAAGTCTTTTTAAAATTATACCTATAATTAATTACTTTCTTGCAATAATGGTTTAGTGGTAATACGTTCGGATATCATGTCGATCGGCGTATTTTCGAATCCTCCTATGAGCTTGATCTTCCTAAGAAGAAAAATATAGTAACACCATATCATGTGCACAGGATTTTTTTCAATGCCAACTTTGACAACGTTCACTCTTAAGTTGAAAATCGTTTGCCAAGCACCTTGTACTTAAGAATCTCTTTTTTTTCGTGGCTTATCGTGTTGTAGCAG
>c14262.graph_c0
ATGGTAATTAAGATATTTAATGTACAGATATCTAGGACAACAGCATTTCCTGATACAACAGAGAGGGAAAATGGCAATGTGGTTTCACTTGCCAGTGATGAATGGGTGAGCTAATGCCTGTGACACAGTCAGTCTCCTCTCGGGATCAAGGATGAACATTTTGTCCAAGAGATCCCTGAAATGAGCTAAGATCTTGGGATCCTCACCAGGGTAACCTTTAATGATGGAACCAAAATCTTTCGGCTTCACGTTTACGATCATTCTTTTTATCAGCTTTCCACTAACGGTGTCTTCCTCTGTAGCATAAAAGTTCAAGTCATGATCAAAGTGCTGATCAATAAATGCTCCCTTGCGAAGCATCTTTTTAGGGAAGGGACCTTTCAGTTCCATATGAAGGCGTAACATATCATTGTTTGTGGCGCCAGGGAAAAGAACTTTTCCACTATAAAGCTCATACAGACAGCAG
>c14274.graph_c0
GGGGGGCTATTTCTATTCTTCTTCTTCTAGTTAGATACCTGTTGTAATGGAATTCTTTCTCAAGCTCTAATATTTGGTGTCTCGTGTAAGCTGTACGTTGACGCTTCGGTTCCATTCCGGGTTGAAAGGAGCCATTAGACACTCCAGCAACGTGTATCTTCTTCATCCAAGGATAAATAACCCTATCTGTGTTATCCGAACATATTGAGGAGTCATCGTCTTCCATCGGAGGACTATCAAGTAGGAGTCTTTCATCATCCATTTCAGAGACAGGCGAGCCCTCGCGCCCTAATGCGTGTAGTTTTCGACCAGCCGGAGCGGCCTCTTCGATGTGCCTTTCTAATC
>c14284.graph_c0
GGGTGGGATGAGGGTAAGACGTTGACGCGTGAAGCCCATCGGCACTGTAGGGTGATACCGAAACACGATGCGCTAGAAGTATGAATACCACAATGTATAATAAACTAAAAATTCAAACCGAATTGTTATTTGTGACTAGTTTTTGTTCGCGGCTTCGCCCACGTTACGGGAGATTTTATCTGTCCCACGGGAATATTTTTTTTTTAAATGAAAGGTACCCTACTTCCTTTTCTATACTTATGACAGAGATACAGACACTAACAAGAGTCCTACAATTCTCCTGCCACCAAATCACAACATGGTATCAATAGGGTAACCAGTTGAAATCAGTTCTATTATCAGAGAATTTGCACACCTCTAGAGTCACTAACATTTCAGCCCTTATTTGCTTGCGTGATGTAATTTAATTGAATATATTTCAGCATAAAAGATACGCCGAC
>c14297.graph_c0
ATTTTATCGTTGGAGGTAATTTCCGGAGTCAGTCCATTCGGTTTTGAGAATAATTTAATTGATAACTGTGGATGTAATAACTGATTCTTCTCGAGGCGACTGAACCCCTTATCATTGTTAAGTTTTCTATTATGTCTAGCAACTATTATTTGTTGTAATATAGGATAGATCGGCCTCAGGTGTAACGGCAAGTCGAAAGTGACAAACGCTATGTAGATTTTTCGAATAGTTGAAATGTTGCCAGCTATATCAGGAGATAGCTTATGATTTCCCTTTCCTCAGATTCAATCATCACATATGTTAGGAGATCCGACATGATTTTACGAATGGAAATTAAGTTTTTTGACATTTATTCATTTAGTGTTTACATAATTATATTTTCGTTCATGTTAAATATTAATATACAGAAGAAACAAATTAAGAAATCTCTTAAATATTACAA
>c14307.graph_c0
CGGCCTACAAAATAGTTAAAATCAATTAAACTATTTACTAGTATAGATAACAACTGCTTACTGGACTACTGTGGGCACCTTTACCATTAATATATAATGAAGAAACTACGCAAGATTCACTCTTGTAACTTATAATCAACACAATGACAAAATTAATTTCGTGTGAAGTATTCTTTCCGTCAATTAAAATTGCCAAAGCGACGTCCATCAGAAATTATAAGGAAAATGAGTCATAAAACGGCAATAGTTAAATGGTTACATTTATATGAAACACTAGTAAATAAAATATGAAAGGTTGCTTAATATAGG
>c14318.graph_c0
AGGACCTGGAGGATGCTCTGCAGAGAGCCAAGCAGGACATGGCCCGCCAGGTGCGCGAATACCAGGAGCTGATGAATGTCAAGCTGGCACTGGACATCGAAATCGCCACCTACAGGAAACTGCTGGAAGGAGAGGAGACCAGACTGGCCAGTGGCGGCTCCGGCGCAACCATCCATGTGCAGCAGAGCACTGGAGGTGGTGGATTCTCCAGCTCCAGCTCCAGCGGTGGATTTGGGTCCAGCGGTGGATTCGGCTCCAGCGGTGGATTTGGCTACGGTGGTGGTTATGGTGGTACCCTCACCAAGTCCACAGTCTCAACAACCAGTTCCAGGAGAGTCTATTAAAAAGGAGAG
>c14323.graph_c0
AAAATACACATTTTTTAATGTTTAAATTCATATACACTTAATAATAATTAAAAATAATCCGTTTAAGTTAAATTAATCAATAATATATAATAATAATCAATAATTCAAGCCTCTACAACACCCTACTGTTTTGTTATCTCTTTTAATTTGGTTTAATCTGGAAATGACAAGACAAGGCCATTGATTGATTAAGCCATTGCAACAAATATGATGAGTACTGATAGGAGTCTCAAAAGATATAGAGAGTATAAACAAAGACATTTACTCAGTCAGAGCAGAGATCGATCCAAAAATAAAAAATATAGTCCGAGTCCAACAACATCAGTAAACATTGCAAGTGACTTTAGTATCGTAAATTACAAACGGG
>c14333.graph_c0
ATAAGCGTATTATAGATTAAAATTGATACGACTGAACTGAGAATGATAACAAATGAACCTACTATTTTATTACCCAACAAAATGTTATGTATTTACTTTATGTATGATGAATATAATATATCTATTTCTTTTTATATATTTTAAGAGGACACTCTGTTCGACTCCCATTAAAAATCAGTGTTACAGTGCTTGTATTGCTGCATTGGGTTGCCAGTTGTTGGATTTTTATTTTATTTATCTATATATTTATAATTTAATTGTATTTCTTTTATTTAAACAATCTACTATTTTTTTTCTATATCAAACTAAGATCTATATAGTGACA
>c14336.graph_c0
CAATTTCCATGAAAATGGGTTAAGTAGTTTCTGAGTTCATTGTGGACAAACATAATGACACTGGCTTTTTATATATTATATGATTACCTGATCACTCTGCAGTTACTAAGAGAATATAGTCGTGATCATTGACACCAGTGGAATATCAATTAAACGTCCACAAATTCGAAACTCAGTATGGAATTCACATACATTTACTTAAAATTGGTAACACTATCGGATGACAATGAAGGAAAACTTAATGAGGAAACCCGAATCTGAGTAATGTTCTTGCAGTACCACCACATGTGGGGACAATACAGATTATCCTATCTCTGAAGTTGTACCAAATTATAAATAAATGCCAACTTCCATGAACATGGGTTAAGG
>c14343.graph_c0
ACGCTTCGACACGGAGGAAGTCACTGTATTGCTGTGTCATTTAATAATCTGTTTGTGTACCTATACAAAAACTTGTTCTATGTTCGACAAGAGGTGAAGACGGTATCACAATGAGTGGAATTACAAATTAAAATTGTGAATGGTAAACACTTTTATGTATGACACAGGTGTACATAACCTCTTGAGATTACTTTAAATTAACTTATAAGAGGTTTAAACGGGTGATGAGGTAATTGTACGTTATAATTCATATAAGACCTGAAGTTGACGACATGGTAATTGAATGTTTACAGTAATGGACGGAGAATTTTGATGAG
>c14353.graph_c0
GATTATTATTTTATTTTAAGGAATAAATTGTAATAAATTTCTAGTAAAACTTTTCTTACAATTTCGTATAGTGGCAAAACAAGACAGAAAACAATTTTTTACAATTTTTACTGTTTTATCATCATATAAATGATTATTATTTATCTGTTTTTATTGTAAATTTATTAAGGAGGTAGTAACAAAATACATGAATATTTGACATCACAGAATCTTCTTATATAGTAATATATAAGTTACTAGCCTCTGCCCTCAACCTCGTTCGCATGGAATACCTACTTTTGGGTTAGACACAGCGGAAGCTCTCAAGAGGA
>c14354.graph_c0
GTCTGTTAAATTCTCTATGAAGACTCTTCCTAACTACATGCAACTACTTGCAATAATACTACCAAGATTGGCACATGTTCCAAGTTCGTGTTGAGTGAATTATGATTGAAAAGTCGGCTAGTGATTTCCTTTACCTCAGTAGATGACAATTATACAAAGCCTGTTGTATTTACTTCCTAAAATGACTGCATACTTGTATTTATAATATATAAATCGCTTTATGACGGGTTGGTCCCCAATAGTTAATGTGCACGTCTCGGAAAATGAGGCAAATGCAGATCAGAAAAGTAAATATAGAACAGAGGCGCGTAACCGACGCGCATGCGTCAGAATATTGATTATCTCGAACAAAGAAATTTACGTAAAAATAATTTTATAGAGATATATATGTCACTATTAAATCGTGTTTTTGTTTAAATGCACATTTCTTTTTAATTCGAATGTTACAAGTATATTCATGACAAAAAAATATTATTATATACCTT
>c14358.graph_c0
GTTATAACAGTGTTTATGTTAATGGGTTTTGTTTTCATTCCCATTGGTCTCATTACTCTTCGTGCTTCTCGTGATGCTATTGAAATTATAGACCGGTATGATGTTGAGTGCATTCCTGAAGAATATAGAACCAACAAACTGTTGTATATAACTGATTCATCTATCCCAAAGAATTGTACGCGCTACTTGAAGGTACAAAAGTATATGAAAGCTCCCATTTTTATCTACTACCAGCTTGATAACTACTATCAAAACCATCGCCGGTATGTAAAGAGTAGAAGTGATCAGCAACTATTACATGGACTGGAGTATAGCCACACAAGTTCTTGTGAACCCGAGGAGTCATCTAATGGTCTCCCAATTGTTCCTTGTGGGTTAATTGCTTGGAGTATGTTCAATGATACATTTACGTTTTCT
>c14380.graph_c0
TTACAGCCCCGTATGAGAATCAGTGGCCCCCTCTTTGTGTGGTTGATGTGAGTATTATTTTAACTACAATTAGCCACCCAAGAGCGATGTCAGAGTCGTAATGACACATCATATAAGGGCCAAGGTGTGTATATGTCGAATTTTCTATAACAGTCATCACAACCTCAAAACGTTATTGATAAATTAATTAATTATAACCTATAAGGTAACATTACATTTGTTCTATAATTAGAAATGTAATGTTAGAATTTTGTAATTTGGAAAAATTGAGACAGGGTCTCGAATGCACCAGATACTTGCAATAAATACTTAGCAATATATTTTTGGATGGCGGTAACTTAACCATTTATTACTTCAAATATCGTCAGTTAATTAGTATATTATCTCAATTTTTAG
>c14390.graph_c0
CGTCGCTAAATATAACATTGTATCGAATGTTATGAAATATCTTATGCGACAGGTTACTTACTAACTATGAACGTTCTCTCTAGAGTTGCAGATCTATGTCCTTACTGATTGCAAAAAAAGACACTACTTCTTAATAAGTCACTCAATAAATAGTTTACATAATGACTATATTGTTAAGAAGAAGCTAAATTATTTAGCACCGTATTAATTATAATGTATATATTTTTTTTAATAATTTTAATTAACCTAACCGTCTATTTTCTTATTCCAAAGGCACTTTCAGAAGTACTCCTTCTATAAAAACTTATCCGGAATTTGGCATATATTTAAGAGAAGAGATTCGTTGTAAACAGATAAATGAG
>c14393.graph_c0
GTTGCTGCTGCCCTTCTAAGCGGAGGAGGATCGGACGAGCAGGATCGATACGTGAATCTCTCTGCAATCGTCTTTACTCAAGTTATCTAGAAGATGGCTGACGCTGAGGACATTCAACCCCTTGTGTGTGACAATGGAACTGGAATGGTTAAGGCTGGATTTGCAGGGGACGATGCACCTAGAGCAGTGTTCCCCAGTATTGTTGGTCGTCCCCGACACACTGGAGTTATGGTTGGCATGGGCCAGAAAGATGCATATGTAGGAGATGAAGCTCAATCCAAGCGTGGTATATTAACCCTAAAATACCAC
>c14398.graph_c0
GATCTTAATGTCGGAAAATGGACTGGCTCCTTTCATCAATTTGATGGTAATGGGAATTTGTTACATAAGATTGATACACGTCTTTCAGCTAGTTCTTATGGAGAAGATGAGCTCCTTAGTCTTAATCAATCGTTATATATAAAGCAGCCTACATCAGCTACTTCAGTTTCCGAAGAGGAGGAAGAGGAACCGGAATGGGTAGAGTACAAAATTAAAGAAACCAATATGTTCACTGTGGACAAGTATCAGCAGATTGGATTTTTCCCAAAGGAGAGAGCGTTTTCGCTGAGGTACCAAACCGCTGGAATGTTGGATACGACGTTAAGGCAGGGCGTGCTCGGGGAGGATGACACGGGAGAAGAATCACCAAGAAATCTTAAACTTCCATCTCGGCGTCCG
>c14417.graph_c0
TCTATAAATATTTATGTCGATAAAATGCTCTAGCGTCATCTAGTGGTCATAAAGTTTATTAACATGAAACATAACTAGTTTTGTTTATTTGAAATTAATGTATAACTACATTTTTACTAAATGTGTTTTGTGCATTAACTTATTAAATTAACATCATCTCAAACTCTGGAAGCATTTGCGAGCGCCATTTAATTTTTTTTAAGAATTCGATATAACTTCTCCAGTAATTCGCATTTTTTTAAACTTTATTGACGATCTGTAATGTTACTCGCTCCTTTTTTTTACAGGCTTTTGTTTAGCTTGCAATGTTTGTTAGTATATTCAGGTCAAATTTTGCAAACTAAATTAGTAAAAGTTCCTTTAGACTATGGCTTTGGTCTTTGTAACATTTTTTTTATATCATAGGAG
>c14454.graph_c0
GTGATTTTGATTAAGTCATTATTCATCCAAATTATCTTACAATATGACTATAGTTCAATACCCAACTGTTACTGTAGTTAAGAATCTATTGACGGCAGTAGTCTTCTTTCCAGATCGCAAATATCATGGTAAAATTCTTTTGTTTGGTAGATATACACTGGTTAATCCAATGTTATAACGGACTGAAGTGATTCAACATAAGCTCACGATTGTTACGCCAATTGATTGACTTGCGAACTTATGGTCGTTGACTTATTAAACTTATCACTTAATAACGCAACCGATCAGAAAAAAGCGCTCTAGAATACTAA
>c14475.graph_c0
ACCAGCTTTAATCTCTGCAATCTCCTCCTCATCCTCTTCCATTGCTTCTGGCGACTCTGCTCTCTTCCTCTCCTTCTCAATATCCTTCTCGATGTTTTCTCTGATCGCATACTTGCAAGAACGCTGGCAAATCTCTGTGATGTCCGCACCACTGAAGCCTTGGGTGTACTTAGCAAGAGCCCTCAGGTCAACATCTTTCGCCACAGGTGATTTCCTCAAGCAAGACTTAAAGATCTGGTAACGAGACTCCTCATCAGGAAGAGGAATGTAGATGAGCTGATCGAGACGACCAGGACGCAGAAGTGCAGGATCAATAATGTCTGGTCTGTTTGTAGCTCCGATGATGAAGA
>c14476.graph_c0
GTGGCTTTTTATGATTTGTTCCTTTTCAAGAATCAGTGTCCATTGGCTACAGATCCATCTTCACCTTTCTTGCCATAGAATCTCCGGTACAAGGAATCAACCTCTTTCAGATAATAAGTTCCCGGTGCCAAAAGATCTATAATACCCTCCTTGGTTGTCACAAAGTCCTTTGCTCCATACCTATGTTCCATTAGCTTCATTGTCTCCACAAACTTCTCAGGTGCATACTCATGTCTAGCTTTCAATTTACCGCCAACATCCATTACAGATGCAATGTTTGAAATGCTGAAAGGAGGCTTATTGTCGTTGAGGCGTAATGAGAACATTGTTGCGGTTGAGCCACTTCCATAAGAGAACATAACCACCCGCTTTCCCGCCAAATCATTGTGTTTCTTGTGGATGAGGGAAGCAAATGCAGCGTAGAGAGAAGCAGTGTACATGTTACCGACTTCCTTTGGTA
>c14481.graph_c0
TTGTAGGCAACCTTTGCTTGACCTGTTAGCCTTCTCAATTTGCATGATTCAAGACGATTAATTCTTCATTGCGCGTGTTAGTGACCAACTTGCCTAACTTCTTCGTTTGTACTATACATCCTGACTTGCTGGGATATACATTTTTCTAGACGTGCATCTCTCGACGGGCCACGTGGTGTATATTTTATTGTATTATATTACATATATTATATTTTATTGAATTCATTACTTCTATTAGCATTATAGTGTCGGAACCCAAGTCAGCTGCTGCTACTGACCAGCTTCCTAGTAGCCTAAACACTGCTAAAATTAAGCGAAGCTCAATTAAGGGTCAAGCAA
>c14487.graph_c0
GGGTCGACCTACGTCCCAAGATCGTCTAGCACCCTCATGTTTCGTTACGGCCTGTGGCCCGTGCTTCACTCCACGGGTTCCCATAGGTGACAGAGGGTGCCCCACATCCACTGTCGGGAAATTACACCACAGCTGTGACAAGTAGTGAGTCGCAGCGGCTACAAGATGGCACAACTAAGCGGTACCATAAGAAACAAGGGAAGGAAGATACAACTTAAGCGGTACCTTAAACAAGAGGAAAAAAAAGACCAACTGACCCGAGAAACAACTGAACCAGAACAGAACGACCCCAGACAGATTGACCCAAGACCGACCGAAACAAGGACAAGACAACCCAGACAAAACAACCGACCATGGATCTCCATATATGGCAGATGGAGTTGCCGGGGGTATTCACGGAAGCGACGCCGGATTGCACTGACACAAAGCGGG
>c14507.graph_c0
ATCGGACAATAGAATGTGATTATTTTATTTTAAGTGACAGAATGAACAAAATCTAAGGGTGTCCAGACATTCAAACGTGTGTTCAAAAAGGAAAAGCTTGTAATTGATCATGTCGGTTATTGCGGTGTGTTGGAGCTTATCAGTAGTGCGGTCGCAACGCTGCCACGAGACCGTTAGGGCGCTGCTGTCCGCTGTATAAGGCAGCACGCAGTAGCGCCGAACCGAACCGCGCGCATACAGACAGATCGTCCATCTAACGGTCGCCAGGAATGTCGTTAGCATCCAGTTTTTGCGAACCGTGATTTCAATAGTAATATATCTTCACAACCGCCACTGACACAAATTTTAAAATTCAAATACTCTTAACGGAAAAACG
>c14530.graph_c0
ATATGATCCGCCATTTTGAGATCTTTCAGCCGAGGGGTTAATGAACGAAACATTCTTTACTGCTAACTGCTATCCTCCACGTCGTTAGTAACAATAATGACGTCATAAATAATTATTTTACTTATTATATTACCTAATATAACCTTTTATGTATTTTGAATTACGTGTTTATATAAAGTTAAGCATATTTCTAAATTGAAATGTTAATTTTATTGAGAATTGCCTGAAACAAATTAAAGTTATCATTATAAAATATAAAAACGGAAGCTTGCGGTAATTTGAACTAATGGAAGGTTAGTTTATTTATTGCCCGTAAATAATTATTGAGAAGGTG
>c14550.graph_c0
GATGAAAAACGTAAAATGAAAATTCTTTATTACATCAGAGATAAGTATAATATACCAATCATATATTATTATGATTCTGATGGAGTACAAAGAGTATATTATGACAATAAATATGAGGAATGGATTGAGAATGAAAATTAAGCATTTATTTACAGTAAACTGTAATTTTTTAAATGATAAAACAAGTTACGAATGCAAAAATAAACTTTTTTATTTGTAAATTCGTAAATTTGAATTGAGGATTGCAGCGTGTTAAACAGCGGATTTATAAACTGCTTGATAAGCGGGCAACCATGACAAAAAAACATCGAATTTTTGTATTTAATGTTACTTAAGAGGATATCACGATTAACAAGTTTTAAGAAATAATTGTTTGTTTAAATGTATTTGCCGATTTTTTACCTCTCTTTACAAATACTATCTATTTATATGACTTAATGATCCACAATGACACTACGTAGTTTTTT
>c14576.graph_c0
GAAATAGGTTCAGCATCTTTTGATTGGAGATACTGTTCTCCAGATATATAAGAAGCCTCCTCGGCATAAGACTGATCATCTGCGTCTTTGTTTGCATCTCTTTCATGGTGATCAGGACTTCCACGGGTCGTTCCTTTCTCATGATCACTTGGATAATCAATTTCATGGGCAAGAAACCATGGTTCATCTTCAATAGGTTGTCTGACATAACCAATGTCGTCATCATCCTCATACTCATCAGAGTCCCAGTATTCATTACGATAGTCAACAGATTCACTTAAACCATCACCAATAGTAGCAAAACCAGAAACAAGATCTGCTATTCCCTGACTTACTGAAAGCCAGTTTCCCCCACCAGATTTTTTTCCACCTGATGAGCTAATTTCTTGTCCAATGGGAACATCAAGGTATGAGCCTATGAGAAGGGCCTCATCATCATTGATTAGCCTTGGACCTGAACCATCACGTTCAAATTTTTCTTCACAGT
>c14584.graph_c0
AGCAAAAGTACAAGGATAAGCAGGGTGGTTCCATAGGCTTTGGCTTATATTTAATGGGGTTGACTCCTTCTACAAGCTCCAAGGATGATGCCATTGCAACTCAAAGAGCCAAAGATTTCTATTTCGGTTGGTTCCTTGGACCTCTTATATTTGGAGACTATCCAGATACAATGAAAAGAACCATTGGATCAAGACTGCCAGTTTTCTCAGAGGAAGAATCAGAACAAGTTAAAGGCTCATCTGACTTCATAGGAATCAATCATTAGTTTGCGGCTTCTGTCACAAACATCAAATTCAAACCTTCTATTTCTGGAAACCCGGA
>c1459.graph_c0
GTGATTCCTGCGATCGGGAACCACCTGTGATGTGCATAATGCGAAGTCAGCGAGAACGATAGCAAAATGTTGTGATCGTGTTTGATAGTGATGGAGCGCTTTAACTCTGAATCACGACGCGTGGCAGCCATCTCCATTTTTAAGCGAAACACTCAAATAATAATAAAAAAAATAAAAAACAGCGAATGGACCGTAATTTAAATCGATCCCAACAATAAATAAACAAACCTGACTTACTGAATGATTGTATAATTTTATTTTAATGTATTGTGCAGAGTCTATCTACAGTAGGTTAGGTATCGTGACAGAGAAAAAGAGACAGAGAGAGTG
>c14619.graph_c0
GGCCTGTAAATCTCATTGGTCCTGAAATGCGATACGCCTAAGTGTTACACTATGGCAAGTGTTACACATAATATATAGAGTGGTCACAATCCAGTTAAACATAATCGCCATATTTCATAATCCAACAATGGCACGTCCATCAAACCATCTCAACTTTTTAATACTCATTGTGTTAAACTGCCTTAAAGCAAATAACACAAAGTCATTGTTAGCAAATCCAACTTAAACTTTTCCATCACTAATAATGTCATAAACATTACTTTATATTCAGACATAAAATGCTAGAATTTAGATAACATTGAAGTAAAGTTTGAAAATAGTGTATTCTGGAAGGTGAGTGGTTTTATTTGAGTGTAAAAG
>c14629.graph_c0
GATTCTCAGGAGTCTGATGGAGATGAAACTGGTTATATAGACCCAACTGTGAATGATGAAACCGCTGTTCAGGATTTCGGCAAATCTGTTTTAAGTCCTAACTCTTCTGATGATGAAGACAAGGATGAGAACCTTATGACTCAGACACCAATTGTTCTTATCCCAGCCATAAAAGGCAGTCGAGAGAAGTATGGCTTGTCACTGAGGAAGTCGAGTGTTTCATGGGGGGCTGATGTGTATGATCCTCCTCCCTCGATAGCCTCCCACACAGTCACAAGAAGCAAGAAACAGCAGCAGAAATCCAAGAGCAAAGACAACCACAGGAAGACTGGAAAGAAAGGACAGAAGTCTAAAGACAACTCTTCCTCACGTGGTGGCAGCAGCAAAGACAAG
>c14634.graph_c0
AAGGAAGGACGCTTTCAGAGGCGAAAGGCCATGGGGAGATACCGTCTGTGATCCATGGATCTCCGATCGGGAAACCGTATCCAAGCTCCGCGGCTAGTCTGCGCTCTTTGGACTTTTAAAACTTAGCGAACTGAAACATCTGAGTAGCTAAAGGAAGGGAAATCAACCGAGACCCCGTTAGTAGCGGCGAGCGAGAGCGGATTGGGGCTTTGAAGAAAAACAAACACGAATCCTCAGCAAAGTGTTCACTTCTTTTTCGCCAGGTTTCATTCGATTTGTTGTGGATTGGATGATGGAAAAACCAGCAAGCCAATCTCCTTGATTCTCAAGTCGAGGGCGCAGTGAACTGTAATTGTGAAAAGGTTGGAAGATCTGGCCA
>c14645.graph_c0
GAATATTTCACTAACATTTAAAAACAGGTACTGTAGATTATCAACATTAAAATATTCTCCACTGTTTAAATGTAGCTCTTCGTTCTTTCTTCTTGTGCATTAAACAGATCAACTAGTTTAGCTCTAAGTCTTGTTCGATTAACTTTACACTCATGGTTAGATTTCACCTATTCTGTTGAAATTTAAAAACTAGATGAACATTCTCTGTGTGGTAATTTGCCATATTCATAAAGTTGGCAGGGTAGAGCGTTAAAATGTGCATTCGAAATATTTTCTTGTGAAGCAATCTGTCTATAATATTCAATTTATCGTTTTTGTATTATTGAAGAAAAACTGTAATCTTAGCTGTTTAAATCTTTCGTTTATAAGTGTATTGTTTCATATTTTTTACATAACTTTAATCCTTCATGTGGTAATATTACAAGCTTTAAAAAAAAGTAAATCACACAACACAGATGAAAGCAG
>c14649.graph_c0
GTATTATTTTAAGAAACAAATATAATGAAAATGTTGACAGTCCTTATGTTGAAGTGCTAGTATATATATAGCTATTGAGCAGAGAAGTTGCAAGTTTTATCCACACACATGTTATAGATCAATGGTCACGAAAACTCGGCTCTTCGACCCCTCAGTTGTGACTCTTCCACAAAATGTTTAGTACAGACACAGAATATTACTTATTAACTAGCTTTGTAAGATACGATTAGAAACATTTGAATTGCAATACTATAGAATAGGAGCACATTTATGGAAAGCAACAGTAATAGGAATGGGTGCTTGCAAAGATGTGTTCTGTTCATTATCTCCACT
>c14663.graph_c0
CAGACGCAAAGCAAGGTATGGCTTTTTCAATTTTACTTGTTTTATCAACAAATTAAGGCATTAAACAATCTGTACCTGTTTTATACAAAGCTATTACGGTATATATTTGTGTGATTTGTAATAATTACAATGTACGTTAATAAATACTCTAAGCTGTTGCTGCATCATCAACGTATCTTTTATTTCCTTTCTGTTGTTTTGTCATTATTTTATGTTTCACGTCCAAATCAAAACCACTATGTTATATTTTTCTGAACAGTAAAATATTACTCACATTATCAATTTCTTTATAGGTTTGTAGTTTTGATGCTGGCAAAGGTGTGATTTGTTCACATTAAATTGTTGTAATAATGGATAAAGAAGGCTGAAGAGTAAAATTGTTGTGTCATATATTATAAACAAATATTAAACCAGACTATTTATTAAACATGTCTATGTTCAGATATTTTGTTGATAATAACATTTATTTTTAGCTATTGATTTTAACATGCTATTTTATGATACTAGCATGGGTAACAAATAACACAATACTCTAAATCTCAAAGATTCAGTTACATGTTTAGGAAAAGAGTGGTTCCCTATCTACTTTATGATATTGTTGATATCCTAATTATGAAAAGTACTCATTAAGATAAACTGTTTATCTTAAATTATTATTTTCATGGCTTCAATGTACATTAGTTTATTTCATATTTTGTAACATAATGGTTGTGACAGATCTTATTTGCTGGTTATTGTGATTATATGAACATAAGATCCTGCT
>c14678.graph_c0
GTTAACAACTAAATAGTTTATCTTGCTCGATATTCTATAAGCTTGGCATTCAGCAACGTTTATACATATGCTCCAGGAGTCTTGTTGGAAATATACACTGCAGTAACTAGGTTAATGTGTAGTCTTTATTGGGGAGAGCTACGTTCTTTCCTTATCTTTCTAAAAAAGTACGATTTTTTTTAATTCTTCTAGCATGCAACGACAACAAGGATGATTACATTCGGAGGTATATGATTACAATAGCGAAGAATGTACAGAGGAACCAGCTTGTCAGGAATTATACGGGTAACTGATGTCACCTACTTTATAA
>c14689.graph_c0
GGTATCGTACTACCAATACCAAAAATAGTCGATCCAATATTACAATTGGCAATATGCAATTACCACATACTCGTATCTGTCGTGATATATCACTACAGTAAAATCACCGTATGCTACATTTTCACAATAATCCCGTTATTGCAATAAAACATGAGATATCATATTTCGTCATTAAATTATCATCGTGGAATATAGGATTTAAGATGTGTCCTTTACTTTACTGGCCACCGATCCTTTTTTTTTATATTGACAAAAGTTACATTATGAGAAATAACCATCGGTTACTCGGTAAGTATATCTTAGCGTGAATACCCAGTACAAAGTTAAATAGAATGACAGGGATT
>c14692.graph_c0
GAAATGTTTGATTCAGGAAGGTTTTCATCTGATAAGCCTTTGACTTTAGTGGTGCCCACAAGGGATGGTGATGAGTCTCTGTACGAATGGTCCAGTAGTTTCTGTCTTTTAAGAAGTGGACCATCAACAGTGCTTTCAGTTTCATCCAGCTCTTCTGTTGTTATGTTGCACGCTTGTTGTTCAACTGTGAATGGAGAGTGACCAGTGCTCATTACTTCATCATCACTTTCCCAATCATCATTATCGTCATCATCAGAATACAGTAACGCGTTGATTTCCTCAGTGTCTTCGTGCATTTCCGAGTCTTCTTCGCCATTTT
>c14704.graph_c0
GTTTCAGCTATTTTGCGAAATATTATTGTAACTATGATGATTGGTCGTAATATTACGTAATATTTCCTATTTTATTCAACGGTAAATGTAATAAATCACATTAATTCAATACATTGCGTTGTTAGGTATAATTATAGCGATATCCATTGCGCACGAAATAAAACTACCATTTCGCACTTAGCGTTCTAAGTAAAAATCGCAATAATTCTCATCTTTATAGCAATGCACTTAGTATAAAGGAGCATGCTCAAACAATAAAAATTCTTAAATAATGATGACCACCATGAATCTACGATTCTAATAAAGCTCTA
>c14714.graph_c0
ATCTCATTGCACTTATCAAGTAGCTTCTCCGAGTGAGTGCACATTGTAGGGAACTTGCCAGCCTTGTTAAGGCCAGGACCCAAGAGACGTGGAATCTGCTTGATCAGGGCATCAGAAGCAATGAAAGCATCATACTTCTTTGCAAGCTTCTTTACGAGCTTCTTATCCTTGTTCAACTTTTTGAGGTCATCTGCAGACATGCAAGGGATATTGCTTTCTTTAGCTTCATCAATGTGCATCTGATCACCAAGAACACAGATCTTCATCTTTGGCTTGGGGATGTGCTTGAGCTTCACTGTGCCACTGAAACGCTTA
>c14729.graph_c0
AAAAAGCAAAGTTTAATAGTTAATTTAGTATTACATTTGATTTTTATACTTGAATTATAAGATTTAGATGAAAATATGAAATCGAACCATACAATATACAAGTTATATAAAAAAGTATTCTAAGATGAAATATTACTATTAAAATTAAATACATATAATTTGTTTATATTCGTCAATTGAGACCCAGGAATCTAATAAAATGCTAAAAATAAAAAAGCACACAAAAATCAGTAGGTAATGTATTGAAACAGTACATATGTGTATAAAAAAAAAACCATATTCTTAACTAATTCATTATGTGTCAATATGATTTATTAAATTGGCTTTATATTCTCAGGACGAATAGTAATATTTTCTTTTCTTATA
>c14733.graph_c0
GGTCTGTACCTACTCAACGCAATTCTGGTTAGTACCGGACATGCAGACTCCGGGTAACGGTAACGCGAGGCTCAGAGTTTGTTCGATGGACACATGTAGATCTCCGGAACGACTTCTAACTTCACCCTGCTTCTACTCTACATTAATCAGTAAACAATTTGTGATGAATCTTTTAAATCATCATCGCGGCTGCTGTCAACGTTTCACATTAATACCTTTGAGGCGAGTCCTCGTATAGAGTAAATACAAAGCGAGCACACGTGGCAACAAGATGCGTGTCGGTGCAGTTCCGGCGTCAGGTCCATCCTTG
>c14744.graph_c0
GCTTGCAATACAAATAAAGTCGACGATAAAATTCAATCACGACTTATATCGTACATAGTACGAAATAATACCATCTTCAATGACATGACGCTTATATCTCTCTGACACTCTCTAACACATAATTCTATTTGGAATTTGTCACAGGTATTCGTTACCTAATACTATATCTATATAACAATCGTTTCTAACAAGATCACCGCCACCGGTATGCAAATAATTTACTACGGAATGTAGTTCCATTCACTTTCCAAGGTGCTAATTATGTAAATTCTTGAGCACTTCCAATGTCTATTCAAGAAATTTAGTATAATATCTTGTGATAACTTAT
>c14745.graph_c0
CTGTCATCGAGTAACTAAGTAGGATATTTTTATTCTACGTTAACACTAAAAATCAGTATTTTGTATGGCATAAGAAAAAACAATTCTTCAATTTTAACGGTTTTAAACGTAAACCGGGTTTTACTGTTAAACAGAGTTTTTTTCTGAATTAAACACGAGTCTACTTATTACTGCGTTATATACGTATTGTACATTCCACGACCTCTGACCTAACTTATTAAACAATTGAATATTAGTTATTTTCATGATTACTTCATGACTGTCTCCTTAAAAAGAGTTTGAACCACTTGGCGAATTCTTGCTTAAACATATTAAAGCCCCTGTAGTTGTATCCTCTCGTGTAATTGTTACGGTTGACATGGTAGTATGGTAAAGATGTTAACAATAATAATAACAATGTTCATCAATTCTCAAGG
>c14750.graph_c0
GTCTAGGCAATAATGTTAGCTAAATATATTACAATTTTCTTAAATAAACTATATAGAAAGTGAAAAATAAACAGATGACCATAGCGCTATCATTCGTTTTGTTATGGTTGAATCATTTGCAATGAATGTTTATAATTACGTATCATAATCAACACACAGATATGTAAAAAATATGTGTCAGTTTATTACGATGAGCTGTTATTAATATTCCAGAGAATATTATTAGAGTTCATATTAATTAACGATTCAATGTGGTTTCATTGTATATTTATATCTCTTATTTATACCACGATTTAAATATTAACAGAATTGAAATAAAATATTA
>c14752.graph_c0
AGATTTCACAATGCAACGCAAGAAGAAAGAAAGATTTACCTCAAGACTGCAAAGCTACAAATAAACCAAACAACCTGAAGAGAATTACAGCGGGTTTGTTTCAATGCTACGAGTAAGTGATGGTCATGATGCTCCACGTTCACCTAAAAATACACGTCCTCCTCCTGGTTGCCTGAAGCTCAGCGGACGCCTTTTTGGCTCAGAACTTGCGTGGCTGTTGAATGCAGGGGATGCGGGAGATGTGCGGTTTCTCCACGCTCGGTCTGACCCGACTGTGTCGCACGGAAACTGGAGTCTCTGGGAAATCATGACCCAACT
>c14756.graph_c0
GGCTGATGCTTTTATTGAAATCATCATATGCTTCTAAAAAGACTGAAATTTTTATTCGTGTACCTACATACAGGTATTTAAACATATTTTAGTGGTGCAAAAATACACATACTATTAAGATAGAAAAACAAATTTACCGTTTTTTTTTAAATATAAAACAACGCCTAGTAATAAATAATTATAATATGAACTCTGGGTTTGATTAGCGTTTTACTGGCATAAGGTCGGTACGGGACTGCAATGAAAATTAATTATGTAATAAATTAAAATGTATTATTTACGAGGCATAAATTACTTTATTAATATATTTATTACATATTGTAAATATATGAACAATATTA
>c14758.graph_c0
AGAAGTACTAAAACAGTTACATATCTCACATCTAAACAGTGAAGAGAGAAACGCTCTCATTAGGCTATGTTCCGATTTCTCCCACATATTTTAGCTTCCTGGAGAAAACCTTATCCCGACAAACGTCCTGAAACACGAAATTAAAACCACAACCTATGTTCCAATATATACAAGATCATACAGATTTCCCGAAGTACATAAGGCAGAAGTTGGGAACCAAATCCAAATATAATCATTCAGCAAAATATTATAGAACTATCTGACTCTTCTTGGTCATCCACCTATTTGGGTAATGCCAAAAAAACTCGACGCATCAAATACACAAG
>c14769.graph_c0
GGTGTACAAAACTATTATAAAACCAGATATACTGCATGTATCTGAGTGCTGGGTTAAGAATACAAAGGATAAGAGAAAACTGCACGCGGCATAGATACAATTGTTATTATGAAGGTGTGTTGTAGCTAAAATCGATAAGAATAAAAATGAATATATTAGATGAGGTATCGAAATATCACCAGCGACAGAGAAGTCGAGCAGTTATAGGTTAATATGATACGGCCATGTCATAAAGAGACATGAAAGATATACATAAAATAGCTTTAAGTATGAGGGTGGATAGATATAGGAGTAAAGGAAGACGGAAAAATGTATGGAT
>c14770.graph_c0
ATTCTAGCTGTAATAAAAGATAAATCACTTGTATGTAATAGAAGACATGTATATGACAATAGTGCTTAGTGACAAATTATTCGTTTAATGTATGACATTTAGATGATTTTATTCATCACTATTTTTTTATATAGAACTTTCACATGGACGAAGTCACGGGCACGTCTAGTCATGAATAAACTTTATAAGGAGTTTTCGTAATTCACGAATTTCATCTAGCATGTACTATTTTTATATAAATTGATGCCATTAAAATATATGTATATAGTATCATAGAAAACCCTACTAATGGAAATTAATTAAATATAGGAAACTAATGGGCA
>c14773.graph_c0
GTACCACATTTGAGATGCTGTCAAACCTGTCATCGTAATTTCTAGAAATTTTTAGAAATTTCTATATTTTTAATCTAAATAGGGATACGAAGGATGGTGACAGTGGATGTCAAGAATGATAAAGGTCATGGGACTAGTAATACTAATAATAAAAAAGCTTATATTAAAAACGTAATAGAATGGTTTCTCATCTCGGGGCGTGTAGCCACGGGATGCAATACTAACAAAGTACAAAGCAACAATAAGACCTTGTTTAGTACAAAATTAAGCGTAATTTGACGTGTATGTCTCTAAAAAACCTATATTTAGTTGACAAGCAGCTTTTG
>c14785.graph_c0
TTGTTCCTATACAAGAAGGATGAAACCACTCAGAACACTCCTCGCATTGCACCATCAAGTCATCTGGGTTATACGGCATCTCACACTTGCAGAACACGGTGACTCTGTCAGGATCAAACGCGCCGGTAGTGGAATTGTACTCGAAACGACAGAAGAAGTCGTCGTTTCCAACAGAGTCAAGTTTGGTGTAGCTACTGAAACTGTGAACCTTACACTTTCCTTCAATCGTATCGGCGCTTTGAAAATCGAAGTGGTCAGAGAGAAAAACCTCCTTGGCTCCATGGAATTGTCTCCTCCCTCCG
>c14791.graph_c0
GGGGCACTTGAGAGACAAATACAAGAATCTGGTTCCTGACAACATTCTTATCACTTGGCAAGATTATGTTCTGGTCACCAGAATGAGGTTCCCAGTGCTTAGCAATGAAATTCTTGAAATGGATACTAGCAGATTGGCGTACAGAAAGATCAGAGCCACCATCAACAATTATTTGCAATATCCTTATCAAATGCTGTGGAGTGTGCTGCAACTGATTAAGGCTCTGCTCAGCAGCTCTGCGCTCGTCAGGATTTGGACTGAAAGCAGCCGCGCCAACGATTAAAGCGAGGCTAGGCAGATCCATCGGGGAATTCACAATCGGAAAGTCACGAATTTCAAGTCTCCTCCCGGAGGAAATCGACGAGACTCGAGAGAGTCAAATCAGG
>c148.graph_c1
GTTGTAACAAAATGGCGACCATACAAGGTATTTTTGCAATATTTCGGATTCGATGTCCTATATTACTCATATTATTTCTAATTACTTCATTCATGCACGATAATTAAACAATATTAGGAAAAATACCCATTACATATTGTAGATTGAAATAATTTGAGGTTATGATCAAAAACTACTCTATGACAGATAAAGGATCCCGTCGAAAACTATCTAATCTATTTATTGAATACTAGCTATGATCACGTTTCTACACGGTTGTACTACAGAGTTATAGTTTTTTTTTAATATTAATAATCGTATTTTATTAAACATCAGGTACCCAGATCGTCAATTGTGATTAAAAGTAACCTACATTTGCCTCTAAAATGTTTCTTACATGGCAATGAAATGATTGTCTATGTCAGTTCAACTTTTTATAAATAATCAGAACAAATACATATACAAAAAAAATGTTAAAATAGTGTCTTTGGGTTACGTATCGTGGTTG
>c14804.graph_c0
AAACTTCCTTATCCTTTGGTAGCTTCTACTCGAAAACATTACAAGAACAGTTTGCTTTTGAAGAGATTTTTAGTTGGTGTTGGCACTGAGGAATCATCACTGTCAGAAGATTTACTAGATGAATCTCTTTCTCGACCTCTCACTAGTGATGAGTTGAAGTCACTGCTCATTGATACAGAGAGATCAAAGCTTGTTAAAAAATTGAGTGAAGCTAATCAACAGAATCGGTTCCTCAAGCGTCAGCTTAAAACACAGGAACATGAGATAACTAACATCAAAACTGAGCTTGCACTTATGGAGCTCGAAGTTCAGGCTCTGGTGAAACTGGCGGAAGAAATAGCAAACCTTGGTAT
>c14815.graph_c0
GCAGCGAGCGCAGTCGCTCTCTTCGAGCGCGAGCTTATCACTTTCTGCGAGTGTTGTCGCTGAGTGTGCTGATACGCATCAAGGAGAAGTGTTGTTGTCAACGGCGTTAATTAAGGTTTTTGATTGGGATAACAAGCCGCATATCGCGCGCGCTATTCTTGATAGTGGCAGCACATCGTGCCTCATGAGCGAAAAACTGTTTAGACAATTAGGATTATCAGCTAGACAAGTTACAAATTCCGTTCTGGGTATTAATAATATTACATCACACATTAGTAAAATGTGTCCGTTGACAATTAAATCATTAAATGATAATTTTTTCACAAACATTCATTGCTTTATTCTGTCATCAATTAGTGAATATATTCCGAGTAGACAGATAGATATTTCGCTTATAAATATACCGAGTAGTATTTGTCTTGCAGATCCAAATTTTTATGTACCGGCA
>c14830.graph_c0
CAATGACCATCGATAAAATGGTCTGTGACGACAAACAGTAGGAATAAAGTAAATAAAACATGACAGAGGACAAAAACGCACCAACTCAACTGATTAAATCAACATACATTTAAAACAGCTGCATTTGAAGAGGACCACAACAGTTTACCACAGATCAATACAAAAACCAGAAGCTAAATAAACAAGTTACAACAAGAATTACTTGAGAAACCTGAATATGGGCTCCAGTTTGCACTTACAGCAAAGCAGTGAAACCGTATAAACCATGCTAGAGTTTCTCATGAGGACGGAGCTTCTGGGATACGACGGGGTTATGATAGAGAAGATGATGTAAACTCTGATATGTTAAAACGGGG
>c14832.graph_c0
GTTATATGACTGCAAGCTGGTTACTGGAAAGCTGAGAGCAATGCTTCAGACTGCCGACGAACAAGTGAGGAGCTTAAAGAAGCAGAGTACTTTTCTGGCTCAGTTAGCAGCAAAAACCATTCCAAATCCTATCCATTGCCTATCAATGCGCTTGACTATCGATTACTATCTTCTGTCTCCGGAGAAAAGAAAATTCCCTCGGAGTGAAAACCTAGAAAACCCTAATCTTTATCATTATGCCCTCTTTTCCGACAATGTATTAGCTGCATCAGTAGTTGTTAACTCAACCATCATGAATGCCAAGGATCCTTCTAAGCATGTTTTTCACCTTGTCACGGATAAACTCAATTTCGGAGCAATGAACATGTGGTTCCTCCTAAACCCACCCGG
>c14851.graph_c0
AAAAGGTGCAAGAAGATCTAAACTCTGCTAAGTCAAAGATGGAGAGACTGGTGGCTGAATTTGAAAGTCAACTAGAAATCACTCAAGCTGATCAATACAATTCCTTAATCCTGAAAACCGAAGAGGCAGTTGCAGAGATTATTGAAGCTTGCTGTCCTATGGATCCTGATTCCTTAGAAGAAGAATACAGTGACTACTCACCACAAGCTGGTGAAAAAGTTCTTGTAACTGGACTGGGAGATAAGTTAGGTACTGTGGTTGAAGAACCTGGAGATGATGATGATACAGTTCTAGTCCAGCATGGTAAGATAA
>c14858.graph_c0
GTCATATATATAAAACAAAGTAAGTTTAGTGGCACCATTTACAACTGAAGAATGGCCGACATATGTAAAGATGTGAACGGATCAACGACCCGCGCGAGTCATATTCCCGCTCCGCCTTCGCTATGGCTTTATAGGCTTATTTCGTATTAGAGGGTAGCGTGTAATATTTATGTCAATAGAAATATCTTTTTACGGCAGAACGGCTAATTGCACCGAGATATAAAATATTAGAAACAAACAGGGATGAAAAAAATTATGACGAAAATTTATTTTGTAAGGAAATATTTATGACTATATCACGAGAACT
>c14861.graph_c0
GCTCTCCTCAAACTCTCCATCTGCTGTTCCTGAATCAGATCAACATGGCACCAGTCGGATCCAAACGGGGAGTTCTGGAGCGCCTGAACGCGGGTGAGGTGGTGATTGGAGACGGAGGGTTCGTGTTCGCTCTGGAGAAGCGCGGGTATGTGAAGGCCGGACCCTGGACACCAGAGGCCGCTGCGGAGCACCCGGAGGCCGTGCGGCAGCTGCACCGGGAGTTCTTGCGCGCTGGCTCAAATGTCATGCAGACGTTCACTTTCTACGCCAGTGACGACAAGCTGGAGAACAGAGGCAACAAACTGAGCTTCACTGGCCAGCAGATCAATGAGGC
>c14869.graph_c0
GTCCTATGCTAAAATGCTTTACAATATTTAGTTGGCACGACGATATAGGACAAGACATATGTCTGGAACGAATGAGAGAGGGATTTCGAGCAACATTCATCGATGTATCAATTCTGAAAACTTTGCATGACGAACACTATCGTGCGGTATATGGCGCGGCGCGTTGTCGAAAAATTATGGACGAAATAGAACGCGCTTTGCTTTCACCTCAAACCGTTCTCGTAACAGAGTCGCGAGAAATACCAAGACCTTCACTGCTTCAGCGAATCGCTAATATCACCGGTATAAATATTCCTACTGACATTCAAGATATCACGACTCTCGCTGACTTGGATGTTGTGAGAGACCACTATCCGTTAA
>c14880.graph_c0
GTGCAGTCCAGACGAATAATGAGTTTCTATACAAAAGTGGCTATTTATCATCATTGTTACATTCACTATCATAACAAGACAATGACTGTGATGAATTAAGCACGAACTAGTGTTTAATTTGATTTTTTGTATTTAACTTTCACAAAGAGCGGTAAATAATTAATCTACACGAGAATATATTATAGCACCCAAAACATAATAAAATACTTATTTTTGTTGCATTTATGAGTTATTACATAGAGTTATAAATTTGTATATTTTTATTACCCTTAAGCTATGAATTAATAATGATATTTCCAATACACTAAAACCTACATACACGATAGCTAGGGCA
>c14881.graph_c0
GGCGTCAAAGAAAATACAAACTGCAATGTTTGATAGCTTCGTCTTATAGTTCCCTACAGCAGACACAAGCCTGGGGTGCATGGGTCTGGATAAGGGTTCATGATGATAATGATGACGATGATTAAGACGGCCATCTTATAGTATAGTTCTACTCTTCTTATGCATTCCCTCGATAAAACACAGTGCCTAAAGTCAGCATACAGTAGCACAATGCTACAAAAAAATAACACACCAATCACACACTTCGCAATGGTGCATTAGTATTGCTGTTACATCACAAATTCATGATCACACACCGACTTCACATGCATTGCAA
>c14889.graph_c0
GGTCAATTGATGTTAGAATATCACCAACAGGAGTATCTAGATCAACATGAATGGAGGACGTTGCATCAGAACTGGTCAACAGATCATTTGGTGAAATTTGACTGTTAACTTGTAATGGCCGGTCAGTCACAGATGATGGCGTGTAGTCAATAGCAGTAAATATATTCCTATCAAATGGACTTATGCCGGTACAGGTAAATCCAGCAATTGCATTTCTATCAGTTACAGCAAGCTTCTCTAACAATTCCAGGAATGTAATGGATAGTCATCGTTCGTCCAGGATGATTTCGCATCCAGTTGTCTGTAGCTGTGTTTATCATTTTCTTGAATGGCCCAAATACTGCTCTGTCGAGAGGCTGAAGTTTGTGAGTGCAATGTGGTGGAAACGACAGCAGTACTATTCCATTCTCTTTACAAAAATC
>c14894.graph_c1
AGAAAACTCGCGACGCCGTTCTGAATCGCCTGATCGAGACCTTATCCACCGAATCAATCCTCTCTAAGAGATACGGTACTCTTAAATCTGACGATGCAACCACCGTCGCGAAACTTATCGAAGAAGAGGCTTATGGTGTTGCTTCGAATGCTGTGTCGAGTGATGATGATGGGATTAAGATTCTTGAGCTTTATTCTAAAGAGATTAGTAAGAGGATGCTTGAATCTGTTAAGGCTAGATCTAATGCTAGTGTTGGAAATGGAAGTGTGGAGGATGCTAATACTGATGCTAGTGAGGTTTCTAAAGATGATGCTGGTCCTGCTTCAGAGGAGGA
>c14900.graph_c0
GTCTAAAATACCTTCTTGCTTCTTTCTCTTCTAATTCTCCATCATTAACAATAACTTCATATAATTGTTTACCACGAACGTATTCAAAAATTAAAAAGAAGTAGGAATTTGAATAGAAAAAATCTTTAAGTCGGACTATGTACGGGTGATTTAAAAGAGAAGACATAACGACTTCTCTATAAATTCGAATTGAAGATTTATTATCATCTGTATTTTTACGAGGAACAATCTTAATAGCCACTTTCTCATTATTTTGAATATTAATTCCTAAAACTACTTTACTACTACTTCCTGTTCCTAAG
>c14908.graph_c0
AAATATAAACCCACGCTAAAATTTATAAAAAATAATTAAAAATTCCTTGGTGTATGCCGGGGTTCTAACCTGCCCACGTCGCTTTGATATTCCACCGGTAAAACCACTAGACCGCCACGACTGGCGCTGGTTGTTAAATAAAATAGGCCGAGTGCCTTAAGCGCCGGTGAAGCTGGAAAGAGCTGTCAGGCTAACAGCGTTGTCAGTTCGAAAATGCAGAATATGCGTTAGATTTGAGTTTTGGACATCGGAGCGAATACAGCGAGAAACCAATAGGAAGATATCTTCACTCGTCTGTGACTATATTATAA
>c14922.graph_c0
GTGTGATGGTTACACGTATCAATTTATTTCCTATACGTTAAGCCATTAATAAAATAACAAGAATGAAACGGAAAAATCTACAAATTTGATTTGAGTGATCTGTAATGCCTCGGTGAGTTACATTTAAGTCGCAATAGGCACTAATGATAGGTACTAGTGAGTTTATTCCAGAGTAATTCCTAACTTCGAACGATATTGCATAAAGTGCCGCCAAAGTTATAAACAAAAATCAGTTTATCTGTATTTTATATGGGTAATCTTCGAACGCTCAGGGATAGTACTTAGATATAAGGGCTCAAAATTTCAAGCGTTTTTTTTTACTCATTTCCAAAAAACTTAGTTTAAAAACTTAGTTATGGGACCGAAAAAAAGTCTTTTGAAAAATACACCAGATTATTACGAAGCGCAAAAAGACTGAGTAAGCTAATATAGGTGACTAAATAATTACATTGTATATCGACGAAGCCTTAACAAACGCGTACTGAATTTTATGTGCCTATTAGAACGAA
>c14934.graph_c0
AACGTGTGTCAGTATCAGTGATAGTTGCAGTACAATCGCATTCTGGATAGTTTTGTTATTATCAGTTACAAGTTATTACTATTTTCGTTGTTGTTTTTTGTTGATATTTGTTATTAGTAGTAGTCATTATTGAGCACCTATCCATGTCGAAAAATGATATTTCAATGGAAACCGTCGTTCCATTATAAATAGATGTTTATTACGAATAATTTATTTACTATGAATGTATTTCATTTATAATAACGCTTTTATAGTGACAAAAATAATACTATATACTTAGTGGATCATTCAATTAAAGTACG
>c14936.graph_c0
GGTTCCACACAATGGTTTGGGAGATCCGTAGTTAAAGATTTAACTTTTGATAATTTATTTTTAAACATCATACTCGTGGCAAAATGAATAATCTCTGAGCAAGCAGCTCGCATATAGAGTTCATGATCCTATCAAATTATACACGGTTGAGAGACTCCGCTAACTTGTGGTTTAAGAAAACAACTATCCGATTATAAAGTTAAAACCTTTTCATCAAATATGATATTCAGATAGCTGTACCCGCGACTCCGTTCGCATGGAACGTGATGTACAAAACAGTGACTATAGAGTCATCCGAATGTATTAAGTTTAAATACTATCAAATTTTCTCTCATACTTAAGTCCCGTCGTCATTCAAATTACAAATAACTTTTGATAGAGTGAAC
>c14942.graph_c0
GCGGGGAGTGGTTCTCGGGTTCTTGATTGTCCTCTGGGTGCTGAGTTCAGTCCCAGTTTTTCCCTTTTCTCTAAGTGGTTAACTCTTCTCGTTGGTGAGTCATCTCTGGTTACGACGGGACCATTTATAGGACGAGTCTTCTTTGGTTTCCAAGTCTTTGAAAACATGCCTCCAAGGCTTCCAAGAAGTTTCTCACCACGACTGAGATCATGGTCGATTTCAACGGCTTTATGGTGCGTCCTAGTGATTTGCTCGCCCTGATCGTGTAACATGACCAAAGTTCTGGTAGCATCAGACCTTATATCTTCTGCTACCTTCAAACAACCTTGTACAGATTTCGTAGTCTCTTCAGCCTTGTACACAGCATAACCTTCAAGCTCCTGAA
>c14943.graph_c0
TTTTTATTTATATTATTTTTTCTTAAGTCACAACACAAGTTTATAAACGAGATAGAGTAAACGGGAACGAAAGAGGTGTATAATTTTAAAATAGTTCAGTTGATTGATGGTGACGAGGGAGGGTTTATATAAATCAGAATGTTGGGCGAGGCTAATTGAATCTAAATTAACCAATTCAAAATTTCCAGCAAGCCGTTTATAACTCGAAAAATCATTCCACGACATTAAGTAAGCAGTCTTAGATACATATTTTTCTTTATAATCTATTCCCGAGTTTTTAACTTCATTTTCCGTGTAAAGACTATATTTGTCAATTATGAAAAATATA
>c1495.graph_c0
GGCGCGAGCGACCGATCTAAGCCGTTGCACGAACGTCAATTTTTTTTTCTCTCTCTCGATCTGACTACGCTTTTGACCTGGCAGGGTCTCCACAGCTTTACCGGACTACAAGCGCGAGCGTCACTAACTGACAATATTATAATGTTTTAATTTAACGCTATAATACCACACAAATATTAGAAAGTAATATTTTAGATTTATTCAGTTATTAGGTAACAGCCACATCAAATTAAAATATGAAACATAACAATAATACAATACAAGGTGAGTGATGCATAAAAACCAAATGGTATTGAAGTCTACT
>c14958.graph_c0
AGTGTTGGTTTCAGAGTTCAATCACACAACACCTCTCTTCAATAGCAATAACCATGGCTCACACTCTCGGTCTCACTCAACCCAACTCCACTGAGCCTCACAAGATCTCGTTCACTGCGAAGGAGATCGATGTAATTGAATGGAAAGGAGACATACTCGTAGTTGGTGTGACAGAGAAGGACTTAGCCAAAGACGGTAACTCAAAGTTTGAGAATCCGATCTTGAGCAAGGTCGATGCTCACTTAAGTGGACTTTTAGCTCAAGTCTCTTCCGAGGAAGATTTCACTGGGAAACCTGGTCAATCGACTGTTCTCAGGCTTCCGGGTTTAGGATCAAAGAGAATCGCTTTGATCGGTCTTGGACAGTCTGTTTCGTCTCCGGTGGCTTTTCATAGCCTTGGTGAAG
>c1497.graph_c0
TTGTATATTTTACTCTTTAAAACCTCCTTTTTATTTTACTAAGATAAATTCCAAGTTTTGTTTTCGTGCCCTTTATGCGTCACAAACCTAGCGCCAACAAACAACAAAAATCATTTAATATGAAAGATTATGAACAGTACATCAACCCACAACCTTTTATAATTTATGCTGTTAGTTCAATAATTCTCTTAATAGGGTCCCTTATGGTTAATATGAAATTATTTTTATACGGTTTGATTCCTCTCTCATTTTCAAATTTTATTGGTGCATACGGAGACGAGAAAATGATTCTTTTCTGTTTAAACGTTTCCTACGCCGTAACTTTATTATTTTTCAAACACGA
>c14975.graph_c0
TTATGAAATCTTACAATCAACATTACTATTACAGACGACAATTCTTTTTATGGTAAGCTATAATATAGTAGTAGGATCACATAGCTGCGTGTAATTATAGCAAATAGGAACCTAAACTAAGTTACAATGGCTAGTGTGCTAGTACATATTGCTATTCACACTACAGACCGAAAAGAAGGCTGCCATTCATGTATAATGTAGGTAAATTCAAAATAAAATTAATCTATTAATAAATCGAAAAGACTTCTAATTTCTACCCAGTTACATGCAAAATGGCAGTTACATACATGAATCCCTATTTACATTAAATCTTACAACATGTATATTATATTAAATGTTTATTTATTGCTATTAACCAATGTTACTAATAAATAAAAATGAGTTTATTTACTTCTTATTTTTATTTTAATAGATGACGGACAATTTCTTGTAATTAGGTACAATGGTTTAAGCCACGGTATAAGGAACGCCCTAATCATAAAGTAGCTTGCAATGACACGTTAAATTACTTTTAATAATGTAACATTAAGTCTGATGTACTCACAATTGAAATTAACAAAACCTATTTGTAAGCCTTACGAGAATTAATATGTATAATGGCACACATTAAATAACACATGTTTTCGAATTCATGAGAATATTAGACATTGCATTTATAATAGTATTTACAAGCCATATGTTGAAGCCACAGATCATCACAAAGCATATAACCATACATTG
>c14977.graph_c0
GGCCGACATATTTACAAACAATAACAAACATATTCACACGTCTCACAGCAAGTTTTCCTCACGGACAAATGCATTTCTTACGATTAAGAATACATAATGCAAATGTGAAAAGAGATCGAGGAAATCATGAAAATATGAAGAAAAAACATTTAATGCCATTAATTGACTGTTCATTTATGTACAATACCCGTTTTTCCAGATAACTTTATTGCCATTTAATGTCAAATTCATTCTTGAAGTACTTTTCAGCCGAGTTAGGGCGTGTTTTTTCCAGACTAAATGCGCGCGACAGGAATCTTCCGGATGCCTCGGAGGGGAGGGAAGAAGATGGGACGGACAATGGAGCGAACGAGGTGGGGGATCCAACAGGTGTGGTGGATCCAGCATCCGATCCCACGGAATCGGACCGGAATCGCCTGATGGGCGGGTTCTGTTTGGGCACTTCTACTGGAATTTGTCTAGCTTTCTCCAGATCGACCTTAAGTTTCCTTC
>c14978.graph_c0
GTCGAATTTTTTAAACGCTACACTGAATAAAATTATGTACCAGTTATAATATACTTTTTTAAACGAGTCTTATCAGGCATATAATCTTATTTGTTCTCACTGGAATGAAGATACGACACGTGACTCGATGCGGGGTGAGATAAGAGTAGCCAAGTAGGTAATAATGCGTGAGTATAAGCGAACAGACTTTAAACTAGTTTGGAATCGCAAAAACTCTCGTCAAGAGCCGATTGTAAATCCAAGGACAGCAATAATATGCGATACCAGATAAAAGCAAGTGTAAAATTTAAAAAAGGGAAATTTAAAACCAATGTAGTTTTACATTTCAAACATTACAGTGTAAAAATAATGTATACTATTAATTTAATATACAATTGGTGCCGTTTAATTTACTGAAAAGGAATAGAATCTGTACAAAATTCGACTGCGATATGCCACCAATAAGAAACTTGTAACTATTGGAAAGCAGAATTG
>c14982.graph_c0
AACGGATTCAATAATGCTTTAGATTCACAACTGAACCCAGCTGGTGGCGTCATTATTTAGGATTTTTATTATTTTCAGGACAGGGCAAACAACATATACTGGGCCCGCTAGTGCTTAAATAAATTAAATGATAGAGGTCTGCTATTTTGGACGCAAAAACTACTGGATAGATCTTGACTTCAAAAATTGGTTTTACTATTTAGACTCTTAGAAGTTTTGTGAAAAATATATCACGACATCTTCATTCTGTGTAAAGTTGTTAAACTTGAAAGAAATTACGACACTTGTAAACATTATGCAATGTATTTATTGGGGGCAAGCGGTTTGATGCGTATGCGCAGGAAAGAGAAAGTAAACGGATAACATCGTTTACGAAGAAAACCTGTAAGTATATTTTTACTTTGATT
>c14985.graph_c0
GGCAACGTTGGTCAACAAAAACGTACTGTGTTTGCATATCGTTATTCACAGATGTTAATTTATTTTGCGCTGATGCGTTCATGTTATCAATATATTTATGTTTTTAACTTTTTTATATTACACTGAACTTGTCGTGTGTTACACATCTATTAAGAATACATTAATATAATAGTGGGTTAAATATCTATTTATTTAAAATCGAATCTATTCATAATTCAAGGTCGTAAAATAAATTTATGATATCGTCAGCGTTTCTTGACTGATCCAAACGTAAATAATTAACCTTGTCACATAGTACGTGCTGTTTGGCGAGATGGGACCGCAATGGAAAATAGGTTTTGGGGGAATAAATAAATAAATTAATTTTTTATTATATTTTGAATTATGAAGGGTAATTATTTATTGAAATACAC
>c14989.graph_c0
GAATGCCATTGACAGTGAGGATTACGGTTTGGCAGCTAAGTTACGAGATGAAATCTCAAAGCTTGAGGCAGAATCATTAGCTGTATCTGCGAAAGCCTTGGCTTTTGAGAAAGCAGAGTATGCATTTCGTTTGGGACAGAAACTTAGACACAAAACTTTTGGTTACCGGGCTGTAGTGTGTGGTATGGATCCAATTTGCAGTGAATCAAGCTCTTGGATGGAAGCTGCAGAGGTTGAAAAGTTACCTCGTGGATCCAATCAGCCATTTTATCAGGTTCTAGTCGATGTTCGGACGCACCCAGATCTACTAGTGGCATATGTTGCTGAAGACAATCTGTTAGCTCCTGAAAAACCCGATAAGGAAAGGTTTGATCATCCATAC
>c14994.graph_c0
ATTCAGTTCATCATCCAACACTGTTTGAGGCAGCCGAAGGTCTGTTTGGCTTCACCGCCTGGTTGATTCAACCACCAACAATGATGTTGTTGATGGGGATGTGGATGAGTTTGACAAAGAATCCAATGAAGCCCATGATGGCAAATCCAATTGCTGTTGCCATTGCGATCTTCTGGAATTCTTTTCTGTCTGGTTTTGTGCATCTTTTGACGAGTCTGATAGAGTCTTTGACGAACTGCCTGCTAGGCTCCACGAATTGCATGACCTGATCCATCTTGAAATGAGGCTGTGTTGGCAAATCAAAGGATAAAGCGGTGGTCCAGCTGAACGCAGACTGACTCCGCTGTGTGTTACGCCACGTAGAT
>c15004.graph_c0
GGCTTTTGTTAGTAAACTCTATCAGTTTTTTTTTTGTTCTGTGTAAAAGTTATACTAACGTAATTTATAAGAATCAAAGTTTTAAATATGAAACAAGCTTTATTCTCTTTCTTTGAATAGTTTGGGGTTAATAATTTTAGGATAATGTACCTGTATATACGAGTAACAAACAATCATACAAAATAGAAATATAAAATTTAATTGATTATATAGTATTAATCAATAGAATTAAATAAAATTGCAGTGCCTGTTTGTAATTTTAAAATAACACCTTTTTACTTAATGGATACGAAAGTAGGTAGTACTTATAGCACGAAAACAATTAAAAAAAATATTCCCTGAGCCGACTGATCTCCGACACAACTGAAACTTCAGTCTGAAATTTCACTTTCGGATAGCTAATCTTATAAGAAGTAATTTAGATTACATTTATTAATAAAAAAAATATAATTCAGAGCAAATATAATAAACTTAAGAAGCATTGTTCAGTAC
>c15008.graph_c0
GAAACAACTATGGAAAGGAAATATTAGCAAATTAATTTTGCACATATTTAATATAATGTGAAAGTTTCTAAAGAGCTTTATTATGAATAGTCTCTGTAAACTGATATATTCTTAATTTATCTTCACGATTTCACTATTATCGGGATTTCCATTAGCAATATGTCATACAAAACATTCGATTAGAGATAAAGTTGTCTTCTAACCGAACTTGTATAATGGAAATATGATGATATAAATAAATATTCTATGAAACAAAATAAATATTATTAGAAATATTTACAAACGAGAAAAAAAATTAAATCGAGATCGAGG
>c1501.graph_c0
TTCATAGCATCCGGAGCTTCCTCGTAAAGGAACTCCAATAGCCCTACTATGCAGAAAACCTCTGCGATTCCGATGAGACAGTACTGGATTAACAACCAGTACGCGGTTAGATCAGGCATTTGGGTCAAGAAGTTGAACTCAAAACCATTTTGTATCGCGTAATGTCTCCTGTAGTTCTCGAATAGCCCAGCCCAAGCTACTGATATGATTGAAACTGCTAGCCCTATGCCCACTCTTTGAAGCTGGGAAGCACCATGAGGATTGCCAGTGATTCTTCTGGTGATAGGGACGAAGACAGAGTAATAAAGGGAGAGAATG
>c15010.graph_c0
ACTCAGTGGATTAATTTCTAAAAACTATTTACTTTTTATGAAGAACAACTATTTGGCATATTATAGATTTATAGCATCTTGCAATCGAAACCAGATTGCTATCATAAAATTGGTGGCAAATCTCTCTTTCTTCCTGGCTGTTAGTCCCAAAAAGTGGCAAAACATTATGGGTAAAAACAGTAAAATCAATATGATATACAATCGTGTATTTGCAAGTTACTTAATATTATAATATTAATAATTCTAATTGCTATCAATTGAACCCTAAGAAAGAAATGTAATAAATGCGGGCGAAATTTAAAATAATGTAATTTTAATGATTCGACCGCAAAATGACGTCAGTGTGATTGTGTATACGTTGCATTAATTCCACTGCAACGTAAGCTACTTATTAATTACACTTTTTTCAAATAATATTTATAAATATGCAAACAAGTTGTTGCAAAAACTTTATAGCTTCTAATGTAACATACATCACTTTGATATA
>c15013.graph_c0
TTCATTCATCACTGCTTTAGCTTCTCCTCATATGAATCTCGAGGCAATCCAGTCACTGACTTTTCTCACTCCCCATCTCTAGGGTTAAAACTGTGAGCATTTGGAGTAGCAAAAGTAACAAAGCATGGCAACACTTAAAGACATTGGTGTATCAGCAGGGATAAACATCCTCACTGCATTCATTTTCTTCATAATCTTTGCGTTTTTAAGGCTTCAGCCATTCAACGACAGAGTTTACTTCTCCAAATGGTACCTCAGGGGGTTAAGAAGCAGCCCTGCAAGTGGCGGCGGATTCGCGGGGCGGTTTGTGAATTTGGAGTTGAGATCATACCTCAAGTTCTTGCATTGGATGCCTGAAGCTCTTAAGATGCCTGAGCGTGAGCTGATTGATCATGCTGGTTTAGACTCTGTTGTCTATCTCCGG
>c15019.graph_c0
GCGTGTATATTGAATAAAAAATATGGTAGTGCGGAGAAAACAAGATTTCTAAATTTATGTGTAATTATCTGCAAGATTTACCCTTTATATCTAATTTTTTAAAATGTATGTATTACGTTAACAATTGATTGCGTCTGGGCAGTAAAAATTGTTATTTTTTGTTATCAGGTCCAAAGGCTGCATTTTTAGTTTTTTGTATATTTTTTTAAAAAAAGCCATGGATCTACTTCTTCACATTATTTTATGAGAAACGTGCCAAATAGTACAATGAAACTTGTTTAAGGAACAGATTCGAATAGATAT
>c15022.graph_c0
TCGCCAACCAAGCCGGCCTGACGACTCAGGCCGCACCATGGTGACATCTTTGACTGACTGATCCCTCGAGTCCCAATCCGGTCAGGTTCCTAAGCCTTATAAGCCTGCACCGCCCTGCCTCCGCACTAGCCGCGGACCCACCCCACTGCTCGGGCGTGCACTAGACCAAACACACTCTGAACGATAATGAGCACAGAGCCAAATTCGCATCCGCGCACAGCCCCGCGACGCCCGCGTTCCTAAGCCGTGCACCAGCGTGATGCACCCGGCCGTGCGCTTCCGAACAGCCCGGGCTGCTGTGCGCCAGGCACACAGGCAGACCCAGACACGCGACGCGACCATGGCGCAGCCACTGCGCAAGGCTGCGCGCCCAGCTGCCGCCCCCTCAACTCCCGGGCTCTGTCAGCAACGAATTATTACTGCTACAGCCGCCGCCGGAGCGGCGAGCGGGCGTCACCGAATGCTCCCTAAGGCTATCTGCACTCCTGCTGCTGCGGCCTAG
>c15042.graph_c0
TATTTGCTCTGTTTATAAAAATATAATTAAATAAATTCTGTAGGCTATTGATGACATTGACTATAAAAGTATTTCCCTAAAGATTAACAGATTATAATGTTGCATTGCTCACAGTATTTTTACATGGGAGTGTTATGCTAGCAGAGTCAGATAGCAGGCTGGTATTGCCTTTTCCAATATCTCCCATCTGTTCCTAGAAAACTTATAGGCGTGTACCATTAGATGCACTCGAGTGACAGTTCTCTAGGTCTAGCATTTTAGGCCACATCACCATTACAGATGCACATTGCAGATGATTGCATACACTAAAACTGATGAAGTATAAAAAAATACATGGCTGACATAAACAAATATTTGATTTTAG
>c15043.graph_c0
AGCTGATTTGCAAAACATGTTGCACGAAGTAAATCCGTACATTAATAATTTTAAAGCCGCCCTGCAGTCTATTCCTCAGGATCATAATAACGATTTCAAATTTGTAATCAGTGCTGACAGACGACCCGCTGCAGAGCATCGTGGTCGTTACAACGCTCCTACCACGAATGAAGTTGCTGTTGTCCTGGTTGATCAGGAGTGTGATAGGCGTGATATAATATTAAGAACCCGTGACGACCGTTTGCAACGCATAAGCGAAACACATCGAGCTTACGATGCCCTTCAATGTCCCCTTATTTACTGCCGTGGCGAGGATGGTTACAATTTTGGCCTCCACCATATTGACCCTACAACTGGAGTACCTAATTACAACAAAAAAGTTTCAGCATTGCAGTTTTACTCATACCTGCTTCAAATAAGATGCGATCATTTCCCCTTTTTACAATGTTTTCGTGGTTTATTTAACCAGTTCGTGGTTGACATGTACGCTAAAATTGAAACGGAGCGTTTAGTGTTCATTCGTACAAATCAAAGAAGATTACGCGTAGAAAGTTATGTCGA
>c15047.graph_c0
GTTAGAATATATTTTAGATACAGTCTATTGACTGTCAGCGACGTGACTGGAGGCTTCGATTACCCTTTTGACTTTCTTGCCAAACATACTCCAGAACGTGACCTTCACTTGAGTTGGCTTTCCAGTCCTCGCATCGAAAACCCGGCAACTATCGAACGGCGGACAGTAAAGATGGAGCGAAACTGCACCGTCCACGTGCGATGGATTTTCCATCCTATGGAGACCCAATGCATCATTTATATAGCATACGTCATTAACCTCCAGTCTCGTCCGGCCTATTTCTTTCATATTCCTAATATCATAGCTGTCCTCGTCGTCATTTCCCGCGCCACCTTCGAAACGGTCCTT
>c15050.graph_c0
AATGTATATTGAGTAGTAATTTATGATGTTTAGTATTTGCAATGACTATGTACTGTTTTTCCTTTTTATTTATAAAGATAAAACTGCACACATGCAATACCTGATGCCTTTCCAATTAACTACTGCATTATAACATACCATAAACAAGACCATAGTTATAATTAATCAGTCAGTATTTATAGTACATGTTTTATCAACCATTCTATTAACATTACTCTTACGATTGTAAGCATTTCTGCTCTGTGTTAAAAATAAGTGCAGTAGTACTGTAGTTTATCATTACTCACATTCCATTAATTACAAAATTAATATTGAATCCCAG
>c15069.graph_c0
GTCATTTATAATTATGTGAGTACCTATAGAAGCTGTTAACACTATATGTTACAGCGGAAAATTTCCAACGCTCCTTTTGGACATATATTGTATCGTAAAACACAACCGATTCGTTGCTTTGTAAAATATAAGGCTACCAAATAACTCTACACTACTCCATTAAATTTTTGTTTTAGCAAACCTTGCGTGTATACTGTTTTGTTAACTTTATATTAGCTATATATACCAGTTGATCTTATCCTTCTGTAGTTTTAACAGCTCTTAAATTAATATTAAATAAAAGCCCACGTTCTAACAGCGCAGGGCTTAATTATTGTAGTTTAATTGTTCTTCTATTTTGTTTATGGTCTGCGCGCCTATAATTTATTGCCAATTTAGAGGTTATCTTCTTGAATTTAGGGTAATAAGTATGTACCTACGTACATAATAATGAAATCTGGCCGGATAGAGTAATTTAGAATAAATATTAATTGCGAGTCTATAAAATCCGTGTTAATT
>c15073.graph_c0
AAGCCCATCCAAAATCATTGCTCACTTTCTCTCCACCACCTCTTTTATCCACCGGAAAAACCTCAGATATCGCTTCAAGCACTAACATCGCCGGATCTACACAATCAACCAACGCCGCCGGAATCTTTGACCGGAGATTCTCCAACTCCTTCTTCCTCGCCGTCACAAAGTTCCAAAAACCTCTCGCATCCATTTTAAGACAAAGAGATTTCAAAGCAGAAAGAAGACCTTCTTCATCGTCAACATCACCGGAATCATCATTAGAACCATCACCACAACCATCTCTAGCTTTCTCTAACGATTCAAGAGCAGCTCTAGCTCGTTCACCTACTTTCCCAGCTACGATCTCAACGCTATGGTCGATTGTTACCTCTCTACGCTTCAGAGACTCGAGCGAGGTCTGAGTCTGGTTATCTAGAGTTTCAATCATCTGCTTCAACGCTTCAGATTTCTTCATCAGATTCTGCTCTAGAGAAGTGAAGTGATCGGAGAGCTCTTGCCATAGAAG
>c15078.graph_c0
AAGTTACGCACCATGTCCAGAACTGTAATGAGTTTTTATTAGTACCAGAAAAAATCAAGAGAAACATTTTTTTATGAAAATATACTTTGAGTAAGTCATACTTTATAATAACTACTTTTAAAAGTCTTACTGTTGGTAAAGGCCTGTTTACAAAATTAGGCATAACTTAATTATTATAACAGCATATGATCAATCGATTCTATATTTACATTACAACATTGTTATATTGCAACAATTTTTTTAGTTTATTTATAAATTTGAGCTGATGGTGTAATTTTATACTGGTACTATAAAGTGAGCTTACCACTGCTTGG
>c15085.graph_c0
GCTGTTTGTTTTCAATTCAATGGAAATATTGAAGGTTTTAGACCTTGTGTAGGCTTCTAATGCAGAGTCTAATGGAGAAGCAATATCTTTACAGTAAGTCAGGCCGCAGTGACATCTTAGTATCCTTTAAAAATATCGATTGTAAAAAAAATTCTGTAAACATGTTTTAATAAGAACTCGTTTGAAGTAAGTTAGATAAATATAAAACAAGTGTAATGTAGGTAAGGGTTGTTGTAGAGAGGAGACGAGGAGCTGGCGACGACGAGGCCGCAGGGTAGGGCTCCTCGCTGTGAGAGACCGGCCACGCCCGCAATCCCTTAAACACCATTAATCTGCTGTCACCCGGGTTGCCAGAACACAGCCCACTGCTTGGAATTCTCAAATATTTATCTCACCAACTAACAAGC
>c1509.graph_c0
AAGTGGAGAAGGAAATAGATAAATGTCAAAGTATGATTGGTGGAGGGAGCAAGGTTGAAGATAATCTGGGGTTGAAATTTTCTAGTTTTCATTCTGTACATTTTTAGTTAGACATCAGATTTGAAATATTAATGTTTACCTTTCAATGTGTGGTATCAGCTGGACTCAGTAACACCCCTTTCTTCAGCTGGGGATGGGGAATGGATTATTGGAAAATGGAAAGAAGAAAGTAACTAAAAGCCTTCCTTTCACAGTTTCTGGCATCACTACCACTACTGATTAAACAAGAATAAGAGAACATTTTATCATCATCTGCTTTATTCACATAAATGAAGTTGTGATGAATAAATCTG
>c15093.graph_c0
ATTAGCCAAGTGATGATATTATTGAGAGAGAGGAACTCACAACTAAGGGTTGAAGTCGCCGAGGAGATCAAAACTCTGCCTCTCAATGGTGACAGAGTCAAGCTCCAGCTTATTCTTGCTGATCTTCTACGCAACATTGTGAATCATGCGCCGTTTCCAAATAGTTGGGTAGGTATCAGTATCTCACCAGGGCAGGAGCTTTCACGTGACAATGGTCGCTATATCCATCTACAGTTCAGGATGATACATCCGGGGAAAGGACTTCCTTCAGAGATGCTAAGTGATATGTTTGAGACTCGAGATGGATGGGTCACCCCTGATGGTTTAGGGCTTAAGCTTTCGCGGAAACTATTGGAGCAGATGAATGGCCGTGTGAGTTATGTCCGAGAAGACGAACGGTGTTTCTTTCAGGTGGATCTTCAAGTGAAGACAATGTTAGGTGTTGAGTCAAGAGGAACAG
>c15104.graph_c1
GTCTGGACCTTTCCGAGGATACATCTTGATGATTGAGTGTTTTGTTAATATTTCCCAGTATAATAATTTAACACGCATTCTTTATTTTAAGTATAGCTTGTCATTAGTATGGGCATATTATAACTTAAAATTGCATTTTAAAAAAATTGATGAAAATACATATGTAGGTCAAATATTATCGATTAATTTCCAGTTATATGATTACTTTTATATGATAAAAGTATTTTTAATATAAATTGCTTTTACAATCCTATTAATCTCACAGACTCAACTTATCTACAAGTACATAGGCACATAATTATATTACCTACAAGCATTTTTCTTAATATAAATTCT
>c15107.graph_c0
GTTCTATCTTCAGGCTTTTGAAGCATCAGATTAAGCGTTACATAGCCATCAACACGGTCAGGACAAGAACCATTTTGTGAAAATGTAAAGATATCATGAAACTCCCTCAAGTACTCCGTAAATCTTTTATGAATATAACCAACGATTTGTTCCTCTATAACAAATGGAATGAACTCACCTAACTTTTCGGATCCGCGATTGCAGCGGTTGATTTTCTCGAAAAATCCGGTGAGATCGGAAGAGTTGTACTCTGCCCGACCGGTCTCGATTACGTCGTCCCACGTGAAGGATGAGCTTATCGGAACAGTTGTTGC
>c1511.graph_c0
GTTGTAGCTCACGCGCTTAACGGCGACGAACAAGGCGCGATGCACTCGCTGAGAAAGGAGCTAGGTGCAGGCCAACGTCCGCTTCCTGAGACTATGATTGCTTTGGTTCGTCTCTCTGGTTCGAAAGGGAATGCTACGAGAGGCCTAGAAATCCTCGCCGCTATGGAAAAGCTTAAGTATGACATTCGTCAAGCTTGGCTCATTCTTGTTGAGGAGCTCATGAGGATCAATCACTTGGAAGATGCGAATAAAGTTTTCTTGAAGGGTGCAAGAGGTGGGATGAGAGCAACAGATCAGCTTTATGATTTGATGATTGAAG
>c15113.graph_c0
TTCGACACGATAGCTTCACTACTTGGTATAGAAGATTCGCTGTCCACTGATGCTGACAGTCATATAAACCACTACATGGAGACATTTGAGAAAAGGATAGCGTCTATGCTATCTGAAATAGACGAATTACGGTTGGTTGGACAAAGCAAGGACGTTTTGCTTGAAGGCGAGAGGAGTAGAGTGGCTGAGCTCAGACAGAAAGAAGCAACTCTTGAGAAATTCTTACTTGAGAAAGAATTCCAACAAGACATTTCAACAAGCTCGACGTCAGAGATCGTTGAAGTGGAACCTCTGATAAACAAGTGGACAAAAACATCGATTCCATCACAAGTCCGGAGTTTGCGTAAGGGAAATATGGATCAAGTCG
>c15117.graph_c0
TTATCTTTGAAAGCCTGATAATTAGTAATAATCCTGTTAATAATATGGTCTGTCGAAAGATAAGAGAACTTATTTTCTTCAAAATCTCGATCTACTAAAGTATCAACTGAACTGTATCTAGACAAATCCTTAGAATCATAAGATGGAAAAATACTAACAATTCTGTGTTGATTTACAAATTCTTGATCTAAAACATAAGGAGAAAATACTACTTCATCTACGTACTTATTAGATAATAAAGTCAACAACCTCTCTTTTTCACTTAAAATAGTAGACAGACCATTATAACCACGAACCAATTTATCCGGATGTAAACCAACCATAAGATAATCTCCTTTCTTTTTTATATTCTCGAGGGATTTCACATGACCAGCATGGAATAAA
>c15121.graph_c0
GTGGTTGCATCCATACAATACAGAGTCTTAGCTGACAAGGCAAGTGATGCTTTTTACAGACTCAGCAATCCAACCACCCAAATCAAAGCCTACGTCTTTGATGTGATCAGAGCATGTGTTCCAAAGCTGAACTTGGACGATGTGTTCGAGCAGAAGAATGAAATTGCCAAATCTGTGGAAGAAGAGCTAGACAAAGCCATGACTGCTTATGGTTACGAAATCCTTCAAACCCTAATTATCGACATTGAGCCTGATCAACAGGTTAAACGTGCCATGAACGAAATCAACGCCGCGGCGAGGATGAGAGTGGCAGCGAGCGAAAAAGCAGAGGCTGAGAAAATCATTCAGATCAAAAGAGCAGAGGGTGAAGCAGAGTCAAAGTACCTGTCGGGACTCGGAATCGCTCGGCAGAGACAAGCGATCGTGGACGGTCTGAGAGACAGTGTTCTAGGGTTCGCAGGAAACGTGCCAGGGACGTCAGCGAAGG
>c15122.graph_c0
AAAATTTACAATAAAAAATGAACGTGTTTTATTAATAATAGAATAGGAATAATCTTAGATTTATTAATACGGTTAACGTTATCTCTATAAAAATAGTGGTTGTTTATAATGAAAAAAGTATATTATTTTTTAAAACCCTTTCATATTAATGACAAAAGTATGGCTAGATGGTTGTTTTGATTTATTTCATTGGGGACACGCAAATGCCATAAGACAATCTCGAAATTATGGTGATCATATTGTTGTAGGAATTCATCCTTTTAAAGATATTTTAAGACACAAAAGTTTACCAGTAATGAAAGATGAAGAAAGGATTGAAGTAGTAAAATCATGTAAATGGGCTAATGAAGTTACTTTAGAAGCACCTTTTGTGACTGAAATGTCTATAGTAAGAAAATACGGGTGTTCTTTGGTTTTACACGGTGATGATTTAGTTACAGATGAAAAAGGACAAGATACGTATCACAAAATTAAAGCTGAAGGTAAGTTCAAAACTGTACAAAGATCTTGTGGCATTTCAACAACTGATATTGTAGGACGTATGCTTCTACGAGAAAGTAGAGAATCAGAACCTGTAGTAATGAGTGATGATAGTTTAAATGATTTGATCGAATTATTTAGAGGAAAACCAAAAGTTAAGTCTGGTAAAATTATTTTTACTGATGGTGATTTTGATTTATTCCATG
>c15124.graph_c0
GTTTTGGCGATAAAACACGTGATGAGAGTCCGTATAAGACTCGCATATACCTTGTACTTATAGGTATTATGGCAACGTGTAACGATTTACAACAATTGTATCGATAAGCCACCATCTCGTTAGTATCTAAATACGTAATAAATACGAATTACGCAACGCAAGATTTAAAAAAAAGAGCTCGCTTTACGCGTGAATCATAGTTAGCCTTCCGACTCGTTTTTTATCGATAGTATACTGGGCATGCACATGATTACGCAAGATATAGTTTAGGGTTATAAAATGCACCTGCAGTGAGGTTTTATCCCGAGTATATAGCTTTATTATACTTTATAGGTCTAGGGCTTTGACCACAATCTTATCTGATGTT
>c15125.graph_c0
GCTACATTTTACTATATAAATAACCGTGTATTGTATTGTATACACCTTCAGATAGCATTAGTACTAAGCTGTACGTATATTGTCCAGTTTATAAATATACCGTAAGAGAAGTCGTAACAACGTCGCATTTTTCCTTTCAAACTGCGATTAAACAAACTTAAGTTAGTTAATAAGTTCAGCACAAAACCAAAGACAACCTTGAAAGTATGAGGAACCGTCAAGACGCCACGCAGCGCCGGCTTATAAATACAGTGACTACAATAAACAGTGCCTGATGAAGAGTGATTTAACGACGTACAGCGGCATGTACCGGTTAATGTATTTGACAGCCCTAAATTACAGATAGCTGTAGTGAGAATTGTGCCTCGTACGAACATTCAATTGAATAACAAAAATATCAGAGCAGTAACGGGAATTACTGCAAGATTGTTGA
>c1513.graph_c0
GTATTGGCTGCTTGGGAAAGCTGAACTCTGCATACGAAAACGATAAAGAGTTGATGATTGGTTTCTACAAGTTTCTCGCAAAGGAGGAGATGGCATGTGAAGAAGCTGAGCTTGGACAAGATGGATTTGAACAGAAAATGAAAGCACTACAACAATTACAAGAACAGCAACTAGAGATGCTTAAGTATATGCGTAAATTCTCTCTGGATGATCAATCTGCTATCCTTCAAAAGCTTCAGAAGCAATTAGAAAATGCGGGTTTTGAGCCGGAGGCGTCTCTTTTGTCAGGAGAGGAAATGGAGGAAGCTGGAAGAAGAAGA
>c15130.graph_c0
GCCGGAAGCGCCGGAGTTATCAGCGGCTGGGACAATGACGAAGGCAAGGCCTTGACCAGAATTAGGTTTGGTGCGAGGAGTGATGGAGAAAGTGAAAGAAGTTTTAAAATCAAAAGGAGAAGAAGTGTTTGAAGATTTGAATTGGATTGGATTGATGTAAAGACCCTGACCATGAGAGAATGGGGTTTCGTCTCGGGTCATGGAAAGAGCTCCGGATCGGCTTACGCCATCAGAGGAAGGACCAAGCTCAGCGTCTCCAAGGAATAACAAGTTGCTGCCATCGAAGGAATCGAAGTTGAATTTGACGGCAAAAGCTGCATTAGCTAAGAACAGAGCAAGAAAACAGAGTTTGTGAATCTGCATTGTGTTTCTTTTGTTGTTGTTTGTGAT
>c15133.graph_c0
TGGAAACCGGGAAGCCCTAGGATCACGTTGGGGGAGTGAGTGAGCTCTTCTAACATCTTGCTTGGTCACATTCTGTTTAGAAGTTGAATCATGTAAAGGCGATTGTCTATCTGACCCAGATCCTGAGCTTGGCAAAATTCCAGAGCTTGCAACCCTTGGTTGAGGCTGAATTCCCTTTCTAGTTGCAGTCGAGGTTGCATTGGTAGAAGAAAACGCCCAGTGCCCAATACTACTTGGATCTTTTTGCTCGCTGGAATATGAATTTGTTGAATTCGCTGGGTCAAACCTTGGGTCGAGAGCTGAAAACCTTGGTCGTTTTAAGAGGTGGTTTTCAGATTCCAGTCTCTCTGATTCATCTGGTGCATGAAGCTCGTTCTTTGGG
>c15139.graph_c0
AAAGCCTTCATCGTCGTAGTAAGCAATATCGCCCGAACAATAAAATCCTTCGTCGTCTAGGTCTTCCTTCAAATCGCGTCCAATGTAACCGTTAAATAATGAAAATCCTTTGGCACATAATTCTCCAGATTGATTCGGTCCTAATTTCTTCCTTTCTTCTATATCTACTATCTTAATCATATTTCCCGGCATCACTTTACCAACGCTTCCTAATTTATTTTCGTTCACCGTCTCTCTTGTAATCGTTTCTGTGGTTTCAGTCATACCATAGCCTTGTAATACATGTTCCAGGTTCGGAAATTTTCTCTTAAGGTCAATTATTGTACTCGAAGTTAAAGGCGCTCCGACGCAAAACATTTCTTTTACTGAACTGACATCGTAGTTCTTTATAATATGTGATTTGCATAATCGAACTACCAATGTGGGTACTAATATTAGGAATCCGATCTTGTACTTTTGTATGCACTGGAAATATAATTCCTCTTGATATTTCCATAAATAGACCACGGTTCGGTTTTTTAAAATCTGGGCAATTGTTAAGACAAAGCCCCCGGTTG
>c1514.graph_c0
GCTGGCGCTTTGATGAGACTGAAGACCACTTGTAGGATTTCCTTATTATAAATTCTATAAGTTGTGGAATAGAGTGCTGTGTCGCCTGCCTGACAGCTAATTGTGCATTTGTTGACAAATGCATTTTTTTAGGATGAAATTCGCTGGATTATATTGCTTCCCAAGTATTTTGTATACGCTGTAGTGATACCCTGTTATTAATGCTGCCTTATCCGACCCGATCTCGATCAAATTTTGAAAAGATAATAAATAATATAAATACATTTAACTAATGATGAGACAAGGTAATTTGCATTCCCTCACACTACAGGCTCCAGCGATAAAAAAAGCAAATACAGAAGTATTTTGTGCCCCACTAAAATACCCCACCATTACGCCCT
>c15141.graph_c0
GGGCTCTTTTAATCATTATATCTACGATGGGAGTTAATTTAACTCGTGTTAGGTTTTTTTTCTTAAAGTTGTATTGACTTTAAATATTATTACTACTAGGCGACAAATGACTTGTAGCTCGTACCTTCACCTTACTTTTCCTTGTGAGATTGGCATAAATATTTTTTAACATGTAATAATCGCCCTTATCAGTTTTTCTCAAAGAAGTACATATTTTCTTAGTTTATTATAGGGATTTAGGGAAGGCAGAAACAAAACTACAATGTTAAATCATATTTAGTCTCCGAACATGTGTATTTCTATGGTTACTTAACAGGAATGTTAGGCGTATTTTCTTTATGGAAAC
>c15148.graph_c0
GTGCGTAAAGAAGTGTTACTTCAAAAGTAAATTGCTGAATCATTAAATCACGATGAAAATGGAAGAAAAACCGTGGAATTGACTTAAAAATTAGATTTTGAACTAGTCAAGTTAACAAAAAAATCACAACATACATCGTTTTTAAATCATCAAATTCGTTCACTAGTTCATGATTTAAAGAAATCCACATAACTTTTCCATACAATTTCCAATTAAAACTTGACGTGGAGCACGGGTTAATTTTAAAATTAAAAACTGCAATTTGGCACATTTTTTTATATATTTTGAAGCTATTGATGACTATATCGTGAAGAA
>c15149.graph_c0
TGTTGATGAAGTATTTTCATATAAAATGTTGCGATCAGTAATATTTTGTCTCCACTTTGGTGTGATAACGAATGTATTTGCAGGTCAGTAACAAGCGACATCTGGTTAGAGAAGATTGTAACTTGATGCTTATTTTGTAATATTTTCTGCGATAAATAAATAGATAAAAAAAAATTAAAGAAGAAGCGGTTACTTGTTTCCTTTTTATAAATATTCCTTAAACTCCTTCATCTTTAGTATAGAGAAGTATTTCTATTCGTCCTTTTAAGTGTAACACAAATAAGTATAGTAATAACTTAGGG
>c15150.graph_c0
AAATGCCAAAAGTTAAGAGATAGGCAGAAGCCTTCTTACATGTATGCATACAATCAGAATGCCCAGCTCAGCTGCTCTGTATGTGATTGGGTTGTTTTTAAAAGCATGTTTGGTTTATCAAGCCACATAAGGGCCCACTCTAAAAAAAAATGAAACATTTTGGACACACCACATCGGAAATCAATGAGGACTATATATTCTACATATAAATATGTTCCCCGTGAAAATGTGTATGCAAAATATTACAATGATCAGTTGAGTAGATAAGTCCTGAATGTCTAAAACACGCAAAGTCACATTCACATTTATAATGTTAGTTAGGAATTACGTGGGCATCACTTTAATTTTGTTGTGGTTATCTCAAAATTTTATGTAATATCTAGGTAGGTCATTTAA
>c15155.graph_c0
GCGGGAGTATAGACGTTGAGAAATAAACAGTCCTCGTCTCCTTTGTAAGTATCAAATAGCATAAACCGATGTGGGCACACTGCACCTTCCTCCAACGCGTCTCGTACACCCGACCACGACTCTAGGGGAATAGGCGGTCGGAACCGGAGAGGTCCACGGGGTGGTTGTGCATATCTTATTCCTTTAAAACTATAATAAGGTGTCTGGTTGTTTGTCCTTGTAACCAGTTTGCGACCGCGCAGTGAGCCCAATTGCGTTGCAACGATGGGCCCGCCTCCGACACGCATTCTGTCGACGAGTGCATGCACAAGTCGCGCTGCCCGAGCTGGCACCGTTTGCAGTCGACGCAGCGCATGCTTTAGACCCACT
>c15157.graph_c1
GGAAGGTGTCCTGAAAACAACTGACTACAGAAAGAGGTGTCTGCAGCTCAATCTTCTTGCTACTGATGTTATCGGCAGTGAAGACTGTCTTTATCTAAACATCTGGGTCCCTCAGGGTAGAACCGTTTCCTCCAACTTGCCTGTTATGGTGTTCATCTATGGCGGTGCTTTCCTGCTTGGCGGTGGTCAGGGAGCAAACTTCTTGGACAACTACCTGTATGATGGAGAGGAGATTGCAGATCGAGGTAATGTCATCGTGGTGACGTTCAACTACCGTGTCGGAGCCTTGGGATTCATGAGCACCGGAGATGATGGCATTCCTGGAAACTATGGTTTGTGGGATCAGCATGCTGCAATCTCCTGGGTTCACAGGAACATCAAAGCTTTCGGTGGAAATCCAGAC
>c15172.graph_c0
TTTAGACATAGAACTCAATCTAGAGCTTCCCCAAATAACAACAGGAACTCCTTTATTAGGCCACTTGTAGATAGAGAAATGAAATTGCCTTCCTTTCCCAGTAACAAAAACTTGTGGAGGATCATCACAATCATCTGAATATGATTTAGCAGTAGAGACCACATCTGCTTTGCTTGAAGTTCTTGACAAAGGAGAGCTCGAAACAGTTTCTTTGTTCTTGTTCAAACTACGAGTAGCTGCTAAATTAAATGTTGGAATCTCTGTTGCTTTTGCAGGAAGACTGAATTGGGATGGAGACGAAGTCCCTGAAGAAGATTCGGGTTTGTGAGCCGGGCTAAGGATCCG
>c15172.graph_c1
GTGCCGGGCTAAGGATCCGAGAACCCGGAAGTGATGATGATTCATTAACTCTGAAAATATCGTCGAAGAAATCATCAGTGGTGAAACGACGCCGGACAGATGATGTATCTTCGCCGAATACAGGCTTCTCGTCTTGCGGAAGCAGATCGCCGACGTCGACGATGACGTCACGACGCCGGAGAGCGGATTCACTGAAGCTATGTCGTGTGACTTCGTTACTAGTAACTTTAGAGCGTCTCTTAGGAGGACCACCAAACACGTCACCAAAATCGATGTCCACGTCATCGCCACCGGGACTACGCAACACAGGTGGTGCTGAGTTGGAGCCTAAAAGAACGGTTTCTGAGCTTGGTAAT
>c15173.graph_c0
GACCGTTGTCTATCCATCACCGACTACAGTGCGGTATATTAGATAATGTTTGACTAAAAATTGAATAATGACATCTGACCTGGGGCTAGCAAATCACGTGTTCCAGTATTACTTTAGAGTGACAATCTCGATAACCTATATAAGTAACCAAGTAATAAAGAATTATAGGTGATAAATTCCTTAGTCTGCGACCTTATAGTCTACATTAAAGGAGATAAATAAAATTCCCATAATCAGTGTCACTTTTGGACCGGGTGAATGAAAAGTTTGTTTTATTTATTTAGAGTCTTAGATGTACCAATGTGCATAAAAAACAGTATTAGTATTTACAATAATTATTGCTTATTTACGATCATGAGATCACTCGTATGCGTCTGCATTAA
>c15182.graph_c0
AGGGAACCAAGAGGGTGTGTGATGAAGATGAGCAGTTTAAAAGCACCTGTTCTGAGAATTCAGGCCACAGAATACAGAGAACCAAGAGGGCGTGTGAAGATGATGTCCAGTTTACAAGCACCTCTTCTGACAATTCAGAGCTTCTCAGGGTTAAGGGCCCCCAGTGCATTAGATTATTTGGGAAGGCCTAGTCCAGGTTTCCTTGTTAAGTATAAACTTGCAAAATCATCTGGGAGAGAAAAAGCTAGCCGATGTGTACCCAAAGCAATGTTTGAGCGTTTTACCGAGAAAGCAATTAAGGTCATAATGCTGTCTCAAGAGGAAGCTCGGAGACTTGGCCATAACTTTGTTGGGACTGAGCAAATACTGTTGGGTCTAATTGGAGAAGGGACTGGGATTGCCGCCAAGGTTCTTAAATCCATGGGGATCAATCTTAAAGATTCACGCGTGGAAGTAG
>c1519.graph_c0
GAGCTTCCTAAACTGGATTATATGATCTTATTTACTAATTATTAGTGTGTCAAGCGTCAAACGTTTTGAGTATGGAGACAGGATTGCCAGCTTTGTTAATTTATTGGTCTGAAGTAGAGATTGAAAAAAATATCCTAAACCATGAAGGCGACATAAAAAAATGTAGTAAACGTAGAGATTACATGATAGAAAAAATATAATAAATAACTGTATAATCCATAATGAATTCGATTCGATTCGAAAATAGATGTAAGATTAATATGTCAAGATTGTATCCTTGTTATGTTTCAAATTTTTATTTTAATACTTTAACATTTCTTTAATGATAAATATATTATTCAAAGGAATTATATTTTATCACCTAATCGAAACTCTGGAGCCACTATTTACTGCAACTACGAGAAATAGCTAAATGACCGATTTCCGAGGAAAAGCTGTTTTAAATTGCACATCGAACAGAA
>c15195.graph_c0
ATATGAACTGTACATGCCTCTCTTTATTACAGTTGTACCTGATTGTATTTGACAGTAAATAGAGCGAAAGCACTGGCTAATCCCTAAAGGCAACAACCAAACAGAGTCACTGTAACATTTTTAAAACATGTATACAAAATTATAGCGATCCAATCTGGTACAGACACCTTACTTCTCCACTTGGTTACTGGATTACTGAAGTAATTTATCCCGGAACGTGACTCGCCTAAGCATCCTACTATAGCGGATGTGTCTTGCCACATGCTAAAGAGAAGAGTTTCGAGGGGAAAAAAATGCCTTAAATCGAGAGAGATAGACGAGCGTGATAGAATAAGACGGGTGTATGTGTGCGCGAAATAAAATAACAAAGCTGAGTAATAGGG
>c15198.graph_c0
GTATGGTGCACAATGCCATAAGTTAAGTCAAGTTATGTTTGTTTTATTTCAAAAATGTAATTAGAGGTAATGTTGTTTAACTAAGGTAACAAGTTTTTTTCCGAAAACATAAATTTAGATAATAATTACATTGCATTGTAGAAGAAGATTTCCAATCAGAGTTCTGTCAGTACGTGTGTCGTTTCGATATTTGAGCCGCTTAATTTGAAAGTGACCTAACTCCATTTACTTCAAATCGAGATATTGAAAGTTTTGCGTTTCAATGAATTTAATAATATACGTATAAGATGTAGATATGTAGATACACGTAGAA
>c1520.graph_c0
TAAGACTAAGCAAAGTCTTAGCTATAATTTAATATGTAGACACTGAATTAATATTCTGTATTATCAAATTACCGGTAAATTGAATTTAAATTCAAATGCATTTCTTAAAATATGCCATTTTGTCAAATGCTATTATTTGTTCACTTAACGTGAAATCTTACACTAGATACCTCAAATAGATATACGTATTTGCGTGTAACCAGCTTCAATGGTGATAAGACTGTACTATATATCGTATCTTTGGTAAAACCTTGTGAATTGCTAAAATATACAGCCATCATAACTTGAGTTGATGTCAACAAATCAGTAAATCTTACAAGAGGCTGTGATACTGTATTACAAGATATCTTTGTTGTTTCTTCAGATTATATTCAATTATATTGTATTATTATTTTTTAACAAATTTGATGAAGTAATATCGTTACAATAATAAAAGGAACAGAAAAGCTAGCCGATCTAACTAATTGGGTTTTGTTAATGTAGCATCTAAGGTTTCTATAGTAATACGTA
>c15205.graph_c0
GTTGGATACACAATGCCTCCTTCCGCTTATTCATCTCCTCAAGGCTCAGATGTAGTGCTCTTCAACTCGCGTTCTTCAGCTCCTCCTAAAATGAGAAGCCATTCTGGTAGCGATTACATGTATGCGTCATCTGATTCAGGCATGGTTAGCAACCAAAGATCATGGTTTTCATATGATGAGTTATCTCAAGTTACCAGTGGGTTCTCCGAGAAGAATCTTCTCGGTGAAGGAGGGTTTGGCTGTGTATACAAAGGCGTTCTTTCTGACGGAAGGGAAGTGGCAGTTAAACAGTTAAAGATTGGTGGAAGCCAAGGGGAGAGAGAGTTCAAAGCAGAAGTTGAAATCATTTCTCGGGTTCATCACCGCCATTTGGTTACACTAGTTGGTTATTGCATCTCAG
>c15216.graph_c0
AGATAGCTAAAGCAATGGGACACCATGTGACTGTGATAAGCTCATCAGATAAGAAAAAAGAAGAAGCTATCGAACATTTAGGAGCTGACGACTATGTGGTGAGCTCTGATCCAGCAGAGATGCAAAGACTCGCAGATTCCCTTGACTACATCATTGACACCGTACCGGTGTTTCACCCTCTCGACCCTTACTTGGCTTGTCTTAAACTCGACGGGAAATTGATTCTCATGGGTGTTATCAACACTCCTCTTCAGTTCGTGACCCCTCTCGTCATTCTTGGGAGGAAAGTGATATCAGGGAGCTTTATAGGGAGCATTAAAGAGACAGAAGAAGTGTTGGCTTTCTGCAAAGAGAAAG
>c15223.graph_c0
GTGGCCTTAAATCTGTCATTCGCTAAAACATATATATGATACGTCTTCCGACATATGTGTAGTGAGTTGCGTTCGTCTCGTTATACTAATAGCTCGTAAATATATCAACTCCAGCGGCGGATACATGTGCATTTCGACAAATGCTCGCTTATAAAATATGTGAGCCCGTCACTTTGAACTCTCCCATTCGTTTCGTTACCGACGACTGAAACAACAATACCGGGCCCATTACAAGAGTCACTTTAAAACTCGAACGGATATCGCGCCGTCCATCACTTTTCCAACATTCGACGAATAACAGCTGTTTTTGGTAACCGTTTCTAAAAATCACTTAACATGATCG
>c15226.graph_c0
ATATGTAATAAAACAGTAATATTTATAAACAATTTAAAAAAAAAACGATGTATTTCATTTACTGCATAATTTTGAATTTAAATGTAAATTACGTATAATCATTAATTAAAATTGTATAAGGTAAGTTTAGCTGTAAAAACATAGACTCCGTTGTTTGATAAAATTGACTATTGAAAAAAAGTAAGTGTTCAAAATATTTTGGGGGTGGCTAAATAAAAATTACATCGATATAATATATTACAACGAAACAATATTTTTAGGACTGTATGTATCGACTAAAAAGTTCGATATTTTTGCCTAATGCGTGGTTACTAATGAGCACTGAAAATATAAAACAA
>c15229.graph_c0
TCTGACCTGCCACTATAAAGCCTTCCGCAAGTCTACGTTCCATACATATAAGCACTTGAGAAAAATACGTGTATTTAAAGATAATTAATCATTTAACACAATAATTAAATATTGAGAATTTATGATCATATTTAATGGGCGTTCCTGGAGTCCTAGCCGAGCTTAAATTATATGATTAATGTATAATACACTTAAATGTTAATATGATAATTTATGATGATATGAACAATATCAAATAAGGATATATAATTTAATATTGCAGTTAAAACTATACAAAGTTCTAGAAAGTCTTTGACGCATTGCAGTGAAGCTTACTTGCACTTTGTCAAATAGACCGCAACGCCGCGAATAAGTAGGCTGTCGACATTTTTGTTGTATCTATTTTAAATTATTACTAGTAATTTCAAAATGAGAGCTAAAGAATATTTGTATTTAAGAGAAAAACGTGCAATACATACTTTGAAGCGATAATTATAATTTCACCTGATACCGCCGTCATCTTGTAAAAATAAAGATGCTTACAAAAAGACAGGTCTTTAAAAAAGGTCTTCGTTCCTTATTAGTTCAATACGTGTATATGGGTTATAGGCATAAGATAG
>c15231.graph_c0
GTCCTGTATTATTATTAAACTAATGTTATTGTTTAATGGTGGGTGGTTAGTTGTGACACTTTTACAAGTATGGAGTGGGAGAAAGCTTTAGATAATGAGAAGAGGAACAGAGAAGGAGAAGTGGAGTGATTAATTTAGAGTAGGATTATGCTCTGGATTATAATTGTCGCTCTTAACACTTTGTGGACTGGCAAGTTTACATTGTGAGTAAACAACTTTACTCTTTACAAATTTTCGAATGACTAAAATTTGTGATTTAATCCTAAATACTAAGAAATATATATTTTTTATTACAAAGAATACACAACTAGACATAATATATAAAGATTTTGCATTGTTTTATATCTCTCTGGGTTTAATATATTATAATTGATGATGCAAGTGCAATGAGTTAACTCATCACAGGTCAAATATATATGTTAATAAACCATTATTTTCCTTAAATTCAGCCTTATCAAATTACACAGTTTAACTATAAAAAATTAATACATATTACACGATGCAGGGATCAATTAGTTGGTAGATTGTTGAAATCCAAG
>c15234.graph_c0
CTGTAACTAGGACCCAGGAGCACGAAAAAGAGTCTGCCAGCACTTATGCGGCGGGAAGAACCAGACGTGCGGAAGTTGAGAGGACTCTGACCGATCCTCAGAGGGATGAGTTCGAGGACATGTTGCGTGCTCTTACTTTAGAAAGGAGTCAGATAAAAGAAGCTATGGGTTTCGCTTTAGATAATGCAGATGCAGCTGGAGAGGTTGTTGAAGTTTTGACGGAGTCCCTGACTCTAAAAGAGACATCAATTCCAACCAAAGTTGCTAGACTCATGCTTGTGTCTGATATTCTTCATAATAGCAGTGCACGTGTTAAAAATGCATCTGCATACCGAACCAAATTCGAAGCAACTCTACCTGATATAATGGAAAGCTTCAATGATCTGTACCGAAG
>c15237.graph_c0
CGGCGAGAGACAGAGAGCGAAGAAGAAGACTCAAACCAAAAAAAAAAATGGAAGCTGCACTGCTTTCTCTTCAGCCCTTCCCTTCCTCCGCCACTCAACGACGTCTCTCTCCGTTTAACCTCCACAATACACTTACCAGACCTTCTTCTTATGCTCCTCTTCGTGCTCAAAAGTCTGGAATCACAGAAGGTTCTGATTCAGCATTAGAGGCTAAAGTAAGTGAGCAAGAAGTGGGAATGTACCAGAATGAAGTAGTTGAGAGTCAAGGTATAAGGATAAGGAGAAGACCACCTACTGGACCTCCATTGCATTACGTTGGACCTTTTGAGTTCCGGCTTCAGAACGAGGGAAACACGCCTCGTAACATCTTGGAAGAGATCGTATGGCACAAGGATAAAGAAGTTGCTCAGATGAAAGAGAGAAAGCCTCTTTATAGCTTGAAGAAGGCTCTTGATAATGTTCCTCCTGCTAAAGACTTCATTGGTGCTCTTAGATCGGCTCACCAAAGAACGGGGTTGCCTGGTTTAATAGCTGAGG
>c15245.graph_c0
AGGAATTAACACTACAGTGGACGTTACTTCGCACGTCCGCCTGGAATTGATTGACGCCTTATTCAAGCAAATATCAGGAACTAGTTTGTGTCCGTGAATTTGCTTGCGTGAATATGGTTTTGTGGTTTTTTGAAAAGTAGTAGTTTTATCCGCATTTTTATGGCCTTTCTAGTGTGATTTTTTAATTTTTCCTTGTTAAATTACCTTTGTTAATTTGTGTCTTTTCTGCTTATCCCCAATGGAAAGGGGTGGCTCGAGTATTATATAAGTACGAAAGGGGGAAGAGTTGTGTTTTGCTTATTTTTGATGGCATATGGGTGTGGTGGATTTGAATATTTATATCTCGTTTTAAAACTCATAAAATGCTTGTGAAATCTCCACATATTATAAAAAATGGCGTGTGCTACACCTGTAACGATAAACTCCAAAAGTATTGAAAGGATTTTCATGCGGTTTTTAATAAATAGATAAAGTGATTCCTGAGGAAGATTT
>c15250.graph_c0
GCCTGCTACTTCCTTTATATCGTTCTCTTTTGTTCTGTCTACCTCGGCTTCTTTTATTCTCTCTGAGGTACCATTCTGTTATGAATTTAGTCCGTTACCTTTTTTATGTCCTATCATATGTCTTGCCCATCTCAATTTTTTCTTTATATTTGTCGAGGCATTGTTCAAAAAGTGTACGCCACCCTCATCTATACAACAAACGATAATCAAACAAACATCTTACAAAAGAAAAGAGTAACAAAAATATAAATTAAAAACAGAACCTTACTATCACTTTCTCGCCCTTATACCGACGTCCAATATATTACAGATTAATTTGGCCTCTTCCGATGCTGGGTGTGCCAATATTTGTTTACAAAAGCCT
>c15255.graph_c1
GTAGGTCGAGGAACAAATTGCTTGATTGCCAGCCTTTTATTTTTATATATGTTAAACACTTTGATGGACAATATAATGTCGAAATTATAGCTTTTTATAATCGGAACGTATTAGGATGATTTGCATCCAGATTAAAGATTATATTTTGTTGAAGGTAGGTGTTATTAGCATAGTTATAGGAATTAGCTTGCTATCATCGTCGGTCATTTTAATAATTTAAAACGTTATCGTAAGTAAATTATAATTTGGGAAAACCGTGTTTTAGATAAACCCTCAGTTTAACTGGACTTAATAGTTAGCAATTTCGGGCTTGTACGACTAGCTGTTTCGATACGATAATGATCTAAGTTTAAAATTAAGACACTACCTCATTTATGCGTTTTGAATTATCTAAAATATCGGATAAGGAGCATAGTGAACCGTGTTATGTAGT
>c15261.graph_c0
TCCGCACCAACACCCTTAAAAGCTTTCTTTAAGAAACGCTCGTCGCTTGCATCTCCAGTCGTCAACTCAACATAAGATCCAAAAGCTTCCAAAGCCTTTCTTTTGTCCTTCACAAGTGCTTTAACCCGAGTTCCTTTCACAATCAGTTGCAGTATAATCATCTGACCCAAATCACTGTCTCCATCAGTTACAAAAACAACGTCTTTCTCTCCATCAAGATCATCTTCTTTTTCCTCTTCAAATTCATCGTCGTCTCCACTTAAAGATCCATCCTTTGGCCGAAGTTCAGGAGCTCCATACCATTTCCTAAGCTTGGGACCGCCTTCGATATAATCGAGAATCTGATCCACAAAACTGATTTTCTTCTTAGCGAAACAACGAACAAGACAACGTTTTCCAGATGTTATCCCAATTCGACATTTATTAGCTTCTGAGTCCTGATTCGAAG
>c15270.graph_c0
GAAAGTTGTGTCGAAGAAACGTTGGAAATCTCTTGGTCCTCTTCATCTGAAAAGCAAATCAGTTGCACGGTTTTGCTTCTTTTCGAAGTTGAAGTCAAACAACCATGGTCCAGGCCGTGCACCAGTGTATCTCAATGTTTATGACTTGACTCCTATTAACGGATATATCTATTGGGCAGGCCTTGGTATATTTCACTCTGGTGTAGAAGTTCATGGAGTAGAGTATGCTTTTGGTGCCCATGATTATGCAACGAGTGGTGTTTTTGAGGTTGAACCAAGGCAATGCCCGGGCTTCAAGTTCAAGAAATCGATATTCATTGGAACCAC
>c15285.graph_c0
TTATAGTTCAGACCGTCTTTTCTATAATACTCTCTTTGTATAGGGAGGACAAACCACCTAGGATCAATACCCCCTCACCACTATATAGTACTTTCCAACATCACTTTGTATGGTAATTACTTCGCTCTTAAGACTTGTATTGCTTTGTAAGAATTTTCTCTCAATATAAACTTAAAAATGTGCTAAATTACTTTTTCTATTCTAACTGGCAGTTCTAGAGACAAATAATCATAAGCTTTATAATATTGGTGCAGATAACACCTTACTTTCATCCATAAGCTAGTTCAAAATGATGCGATAGTTTCTTTCATCATGACTTTATTTAATTTAGCACTTTTAATTATTTTTTTAAGTGAAACTTTTTATTGCAAGTACTTTGAAAATCTGATCTGCAACCTTTTTCTGTGCTGAGAATTGCTAAA
>c15290.graph_c0
AATGCTGATGCAGGAAACAACAATGCCGATGCTGGAACCGGAAATGCTGATGCAGGAAATAACAATGCTGATGCTGGAACCGAAAATAACGCTGATGCAGGAAGTAACAACAATGCTGATGCAGGTACTGGCAATGCTGATGCAGGAACTGGTAATGCTGATGCAGGAAACAACAATGCCGATGCTGGAACCGGAAATGCTGATGCAGGAAATAACAATGCTGATGCTGGAACCGAAAATAACGCTGATGCAGGAAGTAACAACAATGCTGATGCAGGTACTGGCAATGCTGATGCAGGAACTGGTAATGCTGATGCTGGAACCGGC
>c1530.graph_c1
GGACGGATTTGGTTCCAGCATATGTGAGATTGCTAAGGGACAATGAGGCTGAAGTGCGAATAGCAGCAGCGGGAAAAGTGACCAAGTTCTGTCGGCTTTTGAATCCAGAGCTTGCGATTCAGCACATCCTTCCTTGTGTGAAGGAATTATCATCGGATTCTTCTCAACATGTCCGCTCTGCTCTAGCTTCAGTAATAATGGGGATGGCTCCTATCCTTGGGAAGGACTCAACCATTGAGCATCTGTTACCAATTTTTCTTTCCCTTTTGAAAGATGAATTTCCTGATGTGCGCCTTAACATCATAAGCAAGTTAGATCAAGTCAAC
>c15308.graph_c0
TGTCAGTATAGAATCGTATAGTAGTGAGCCCGAAGCTTCTACAACCCCTACCATCATGCTAAGATTTCAACACGAAGTTTCCTTTCCCCGAAATCTTCGATTCAGTCGTAATTATTCGAACCTTCATCGATCATGCACTATCCGAATACTATCAACTATGTCATCATCGGTTCAAAGATAAGGTTTTGACAAAGATATGGTCCATTTTCCTAATAGAAAAATGGTAAACGATACCTGGATTATGTTCTTTGATATCTAATCTACGTTTAATGAGCTAGACGAATCACGACAGTATAGTTAAAATGTGAACGTTTCTAGTGTGTCTGTCGAGCGCCATCTGGAATACGTCTGTGTCTATGCCAATCAATGCTGAACTCAAAATATAAAGTTATATTGGAAATAAATCGAATTCTGTGTACCAATTTATAATGACCGTTATTCATCGGTGCACAAAAAAATGGATATTAAGTAAGCCTAATCCAATCCTCATATAAATGGATAAATGCGATTTTAAAGTTTTGTCAACAACGTTGATAGAAAACCAAATATATATAAAAACCAATACGATAAGAAAACCAAACACTGTTTCGGTTTGATTGATATATTGATTATTTGTTATCTAGGCTTACAATTTTTTCCTCATAACACTTATAAATGCTTCACCAAACAGAACGTGCTC
>c15309.graph_c0
GGCAATAGGTCCTATGACTAACATAGCACTTGCTATTAGACTGGATCCAGAATTCATTGGAAGATTAGCGCAGCTATACGTTGGTGCTGGAACTATTTATGGTGAAGAGGACGATACGCCAGAATTTAATGCGGAACTTGACGTAGAAGCTTACCGTATTGTAGTAGATAATGCTGATAAAAATAAAGTCACCGTCGTTCCGTTCTCACAAATTAAACGATCGTTCAATATTAGTAATGAATGGCGCACTGATGTATTAGGAGCAATCCCGACTAAAACAATGATAGCCCAAAATAGTTTTGAAAGAATTTCGCTACCTAGCAGTGAGTCTTGGCAATTATTGGATCCAGCAGTCG
>c15310.graph_c0
TGGACAAGGTGAAGGATAAGATCCATGGCGGCGGCGGTGCTGGCGGTGCCGATCATGAGAACAAGGGAGGGGAGAAGAAGAAGAAGAAGGACAAGAAGAAGCACGAGGACGGCCATGATCATGGTCATAGCAGCAGCAGCGACAGCGATTAGATCGCATTCATCATCGCTGTCTTCTTTTCCCCCTATCTCTAGGTGTGGGCAGAGTCTGACTGGAGCTGCAAATAAGTGGGGGAAAAAGAAATCAGAAGAGTGCTTTTTTATTTTTCAGTATCTATTTTGTGTATTAATATGTGAGATGTTATTTGAGTGGGAGTTCAATATAATGTCTCTTCGTGTGCTTGAGCCTTG
>c15314.graph_c0
GGAATGGACTGCGGTTCTTCCCAACAGACGCCACCGAGTACAAGGTCATCACCGAATACCTCGAAACACAAGAAGATGCGAGTTGGTTTACGTACTCGCATCATTCGAAACAACGCCTGAGGGTCGCTATACGCGGCCTACCGAGAGAGACGAACCCACAGATCATAATCGACGACCTGAAAACAAAAGGATTCGAGGCTGACTACGCCCGTCAGATAAACGCGCGAACTGGTAGACAAGGGTACGTCTACTACGCCTCGATCAACAAGACGCCCCAGTCGATGAAGGCCATCTACGCCGTAGATAGGCTGTTGAGCATGCCAGTGAGAATAGAGGCATGGGTAGGAGAACGCC
>c15324.graph_c0
GATATGAATTCCCAGCCGAGCTCCAATAATTTTAGATGTGTTGTTAAAGTTGCATGAGTCCCCGCATTGTCGTGGCGAAACACGTGCCTATGGTCTCCTTTCTCTAATTACTTCCTCCATTCTCGTAACTTGGTACTATTAATATTTAAGTTGATTCTGTAGTTGATTGGAAGTAGCTTGTAACACACATCTTTGTAATCTCACTAATTTAACAGCGTGATCTTTTCGGATGCAATTCAGTTTTATAGTTTTTGCTGGTTTATCAAATGTACTGCCTTATGTTTTGCGATTAGTGTTATTGCAAACGACCTGTTTTTTATTACAAGTGATAACTCTTTTAAGAAAGGGCTGATTACATTACGTTAGAAACGCCTATTGCAAACATTGAACTGTTATGATAAATGTAT
>c15329.graph_c0
GTCGAGTTCACGTGCCAACTTGCCCAAGTCGAGAGTTCCTGTTGGGTCCGCGATCGCTGCCATACCAGCTCTACCTTCAGCCTGTGGTATCGAGATTCCGTATACGACGCAGTCGCGTTGTTCGATCGCGGGGGACATGACGTTCTCGACTTCAGCGGTGGCGACGTTTTCCCCCTTCCACTTGTACGTGTCCCCCGTGCGGTCCCGGAAGAACAAGTAACCGAGCTCGTCGGCTACCAGAATATCGCCACTCACGAAGGCCGCGTCCCCCTTGGAAAACACGTTGCGGACCAATTTCTTGTTGCTGTCGTTCTTATCGATATAACCATAGTACTCTCGAAACGCATTGCCTTGTGATATCAATCCAATGAACATACCCGGTTCATTGGGTTGGCATCGAATGCAGTAACCGTCAGGTCCACGAACAAGGTTTCCCTGCTCATCAGAACGCACCACAGCTATCGGGTGCAAACTGACTGGCACCAGCTTTGGCAAAAAACCAACTGCGCCCAACGTGTTGTCCACGTTTACTGAAGTGTTAAAAATCACACTAATTTGTTATGCTTGAAACGAAAATCTAGAACACAGAAATAGTTGTCGTAATTATGTAGAGCAAGGGTTCTTAAGTTTTAAAGATAACAGAACACCAACCAAATGTATTTTATTTT
>c15349.graph_c0
AACAGCGCGATAAGTATGTCATTTAAACACCATTTAGATAATAAATGGAGTAAAACGATGTAAAGAAAACAACGCGTAAAGCTAAATATGTGTAAATTTATTTTAAGCAGTATACATTTATTCACCTTTACATAAATACTTTGTATTTGATTAATTAGTTAATAAATTATATTGCCTTTTTTAATATTCATCTCGTTATTATTACTTGATTTCGCTCTTGCGTACATTTGTCTCACTCTATCGCGTTTATAACACAGTTCATTTTTATTACATCTCTGACAAAGGATCTAGTTTCGTCCTTTTCGTCTGAAACGTTGAGTTGTGACGTCGTGGAAAAATTCCATCTTGAGATTTTATTATAGGGAATAACTTAACTCCTCGTTTGGTCTTTTAAGATCCATAACTCAAAATGGCCGATCACGTTAATAAATATGTTATTGTTAAAGTTTTTCAGAATTTCTAATAAATTATTTTAAAGGTATTTAAAAAAAAAATTATGCTGCAG
>c15362.graph_c0
AACTGTTAGCAATTGATGATGACATGGTCACTATACTTCATGGAGCAGTTAAACAAGCTGGAGCAGATTTCAATCGCATTATAGATCCTGATATGGCTGAGAGAACTCTTGGGCCACTCCAAGAAACAATAGATGTATTCACACTAGATATAAATAAAGGCGAACTTTTTAATTTAGCCCCGTATGTCAGCTATAGAGAGTATATTGAGGGCGGTACCCACAAATATGAAACATTTGAAGACTTGAAGCGTATAATGCCTGAAGAGCACGTAGAGTTAATGAAAAGCCTTTTTGAACACGTAGAAGATATAGGTCTAATGGCAGGTATAATGATGGAAAACTATATAGAGGGTGGACACGTTCCAGATACAGCCGCTAAAATTATAATGGAACAAATGTATCGAAGTATTATATACGACAGACATTGGTATGAGA
>c15364.graph_c1
AGTCACATTTATAATTTTAGTTAGGATTGGGGTATCAGTTATTTTTCATAAAATTATGGTACAATTGTTTAGTGAAATCAACCTGATCAGGCAGAGCTTCAAATTGTAGATTATTCCTAAATTAAAATAAACAGTTCTCAGAGATGGATATTGTGGCCATAAAAACAAAAATAATACAACAAACATAACACAGTGTAGTAGATAAATACTTTTCAATCTTTGATGATTAGGTGTATACACAAGTTTTGTATTATAATTTAAGATATTGTGGGACTTATAGTAAATATGACAATAATTATTAAGG
>c15365.graph_c0
TTTTCTTTTGTAGTATTCTTTCTTAATTAGTAAACTGGTTTTCTCAATAAGTATAACAAATAACTGTATATTTTCTTGTATATATTTTCGTAAAATTGCTGCACATTTATCAGAATATGTTTAACAGTTGCAATGTCATCTCTTCTCAATAATTTTGTGTTCAAAAACAACACTGCTTTATAAAATATATCATACAACAATATTTTGCATGTTTATTTCGTTAATGTTATGTCGAACTACATGCACCGTTGGCTTGTGGCACATCTAGCGAATTTGATTTAGTTACTGGATATAACACTGGTGCAATATTGATTTGTACTGAAATAACATTATTAGATATTATTATTATACCTCAGTACATGGAAATAAAACTATGACACTGGCAATCAATTCCGCGACACCGAAAAACAAGGAACATCAACAGTGG
>c15389.graph_c0
GCCGGACTACATTGATATGAAACATAACTTGACTTAATTTTAGGCAGCCGCCGCGCCGTGCGCCATACAGATTATTTTGTATGTCAGAAATGTGCATCTCAAAATGTCAAGTTTATAAATAAATAGCTTTTACCTACATAAAATACATAAGGAAATATTTGTATACAATAAAGTAAATGTAACAACATATCAGTGACAGTTTCGTTTACAGAATTTTTTAAACTTTTTCGATATGGTATTATTGAAGTGAACTTTCTTCAGAATCGTTGTGGTTTGAAAGTCGATAGAGAGAAAATGCTTCATGACAAAGAGACAAACACAT
>c15390.graph_c0
CCTGAAATGGGAGCATCACGGCCTCTCTTGAAATCGTCCCATCCTCTGACCCAGGGCTGTCCAGCCGCTGCACGAGTCTCTGGCGCTGCATGCTTGTTCAGATTCTTCATGACTTTCTCGTGTAACGCCGAGAACACCGGATTTGAACTCACTGCTTCCGGAGGCTGTTCCTGTTCAGTTAGCCATTTCCAGAGATCAGGGTTTTCCAAATTGAGGACATGAATTAGGGATTTAACACCATTTTCGTCCATGGAATTAACATTCTCCTCAACCCAATTCCCCAAAACAAGATCAAGTTCCAAAAACCCTCTTTGCTTGCTCCTATACAACAATCTGTTGATCGTTCTTCTCTTATTCTCTTCGTTAGAGAGATCAATATCGAAATTCTGGGCAGACGCAGTGTTCTCACAGAAGAATCTCGCCCCCAAATCAACTCCATTCCGGAATATAATAGGATATGACCGGTTAGCGGCGGCAGGAATGATAGAGCTCCGGCCAACCACGGCGGTGGAGCGAATGATCCGGTGAACGTTGATCAGAGCTTTTCGGGTAG
>c1541.graph_c0
GTTCATAATGCAATGTAATTCACATATTAATATAAAATTTAAAACTGACAGATAATACCATAGATTGTGGAATAAGACTATCACAAACTGACTATTGACATATTAAAAAAGTAAGAGCAGTATTTATATAAACATTGTCAAAACAATGTGATCGCTCGAAAAGTATGCTTTTACAAGATTTTTATATGTTTATTTATATTTCTAATTCAATTTTATTACTTGAATCTAGTATATAAATGGAACATTTATTCGTAATATTGGGTTATGGCAAAATCATCTTATACAATTCAGAAACAACAAGATAATTTACGATATTTGGAAATGCTGAAAGAAGAATTCATAAGGAAATACACAGAATCGTCAACTAGTGATGGGACACCTGAAAATTTTGACA
>c15412.graph_c0
GTTTATACTGCGCTGAAGATCTAAACTAACCATTTTAGTTTTGTCATGCATCCCACGGTATATATATATTGCAAATAAACTTCAATAAAATTATTTGCTATAATCTAATGCAAAATATCAGTAGGTCATGGTTAACATCTGATACATTTCTACCGTATTAATAATTGGTTATACATAAATATACCTACTTGGTATATGTATACATAAATTGGCGAAGACAAAACAGTTCAATAGCTTTTGTCCAATAACTCCTTTGTTTGTTGTCACCCAATTTCCTTTATTTTATTATTTAATAATTATTACAAAGTTCAATGTTATCAACTTGGAAACAGTTCTTATTAATTACCATTGAGGAATCAGAGGCTTTATTCATAAGTATCTAATCATCATACCATCCTTACGTCTGTCAATCTACAATATATATACCATATGTGTACACATTCCACAAATAACGCCCCAACAAAAAAAAA
>c15416.graph_c0
AGCTCCTCGACGGAGCAACTCTCTTGCAAACGGCAAAATACCCAAAATTATGTCTGCACCAGAATTATCAACAAAAATCACTGCCTTCTTCCAAGACTTATTGATCCATTTGGCTTGGAAGTTTTCCAAGTCATCAATGACCCATGGTCGTGGAACCAAGTTTTGACAGCTAGCCAAGAAAGACATACCATCCCTTGAGAAAACTTCAGCAAGCTGTGCAGAACCAAGATCAAAGATGTTTCCAGCAAATATCCCTCTCACCAAATTCTCTAACCGTTTTCCGTCATCTTCAATAGCATCACTCAGACTGACAACTTGAGGAAATAGTGATATAGCCTTTGCATTCTCCTCATCCTTAACTTTCTTAAATATGTCCCTAAATCCCAATTCTCTTAGTATCAGCTCACGAATTCTGCAGAGAAGA
>c15425.graph_c0
GCTCTTTGTATGTTTTTCTAATGTTCCTTATATTTTATTGCAAATAAAAGTTATATAAGAAAAGTTTTGTTTCGTAACTTGGTGTACAATTTTCAAAATTATCTTCTGAAACTCAAAAGAAAATCCACCTGGTATTGATTTAATTTAAATGAGAGAACATATTTTGACTATAATTATATGCCGTGATATTTAAAACTTGACGTGCAGGCGAATATGTCTGTTTACAGTTTTAATACACAGTTTACGGTTTTAAGTTATAAGCTAAAACGTATAGTAGTCCGATGAGCTGTAAAGGCCTATGAAGCCAATAGCGTAGTCAGTTCAATAAAAAAACAACGCATATGTAAGCCCATTAACATGGCTTGGAGTCGGAGCATACATTTCAGTGAAATGCACGTATCAACGCAATGCGATTATTCGCGATATACGTTTTTAGAAAGAAATTGCAAACACAAACTATAAATGTAAATCCTAACTTTTCATATATTTGCACCATAAAACGTGGTGTGATAAGCATTGGTACTTTCTTTACCTTAATAAATAGCTTTGATGACTATAGTCAGGCGGACCTGTGTCGTGTCACACGTGCGACATGCTCAGAAGAAATTTTAGCCTGCAGCATATATCACAACATTACGCCTGATGTATTAT
>c15426.graph_c1
TTTTCAAAAAAGTAAAAGATGGGCAAACGTGGGCAAAGGAAGTAGATTCAAATGCACCTTTAAAAAGAATTCGTTCTCTCGGCCAACGAGAGATCCATCTCAGTTCGTCGATGTCATGCCAGTTCATAGGCCTGGCAAACAAAATTAACCCAGAAACGCTATAATAGGTATATCGCTGTGTATTGTAATCGCGACATAATCGGGTACAAAACACTACCACCCTGCTTCGTTAATGTATACACACATCATACCTTTATGGTGTGTTACAGCGGGTGTTTTTTTGTTCATATTTTTTTAAAGATTTGACTACAATCCCGCATAATGATAAGTGACAATTGTAATAAACAAACGTATATTCAGTCTGTCAGGAAATCCAATTAACACTCTG
>c15430.graph_c0
GCACAATCGCTCGCAAAAATACTTATTTAGCAATGGTAAGCTCGACAGTGTTTTTAATCGTAATAATATCGATAAAATATATTTACTTTAGTACAGTTTAAGAAAAGGAAGGTCTTTGAATAAATTTCAATTTTGCATTGTTTATATTTGACCCTTTTGGATGACGGGTTTGCCGACCTCAGCTATAGACGATGTGGGAACAGTAAAATTACGAGCTGTTATTTTTGTATAATATATAATTCCTTACGCGTAGTACTTTCACAACACGCACATTTCCAATCTGTTGCAATTCCAAGTAAGTAAACGTTTATTGATAAATTATATATACGTGTCATTTTCTCCCTAAATTTGTATTCTATAGCGG
>c15433.graph_c0
ATACCACACGAACATTTCATAACTAAGTAACTTGTTATAATTTCGTAAGGTCAGCAAGGAATCTGTTTACCAATTGTGAAAGATTGAAATACTATGTTATATTCAATGTCAAACTCTTGTCTTTTATGTGTGGATGTATATTAAAATTTTGTAATTCTCGCGTTCAGTTTTTGTTCGTATAGGGTTTCAAAAGGAGCTCGGAAATACTTATAATTATGATTTTTATGTTTGCCACTAAAAATACTAATTTCGGCAGAAACAGCGCCATCTTGTGCAAAAACTTGCCAATTTGCATTCGCATGCGCTATTTGTACGGAAGGTAGAGGTACTCCGAAAATAGCACGGTAATTAAAATTTATGATACGGT
>c15442.graph_c0
TGAACATATTAAACAGTTTTGATAAGCAGGCTCAAATACTACATTTTTCACAATTCATAATTGTTTTGTTTGCAAACTATGTAGTATGTAGCCAGTATATAAAATACAATTTCATTACATGGTATAAGTTTTTTATCCCTATCACATCATAGGCTTCTTACACAAGAAAGGGATGGGTGTAATCAGCATGTTATTTTTCGATCAATTAGAGAAAAATTCAGTTCTATATGTTCTTCATATACAGTGGTATTACTAGAAAATTTCTTAGGTTCAAAATATTTAGACAAGAACTAATATATGTAAAATATCTTCCCAAAATAAACCTACTTATAGAGGCG
>c15443.graph_c0
TGAAAGGATTAACACTGAATTGTGTGGACCGCAAATCAGAAGCATATGAACTTGTCAGGCTTGGATTGAAGAATAACCTTAAGAGTCATGTTTGTTGGCATGTTTATGGGCTCCTATACCGATCAGATAGAGAGTACCGAGAAGCAATTAAGTGCTATCGCAATGCCCTTAGAATCGATCCTGACAACATTGAGATATTACGTGATCTATCCCTTTTACAGGCACAAATGCGTGACTTGTCAGGTTTTGTCGAAACAAGACAGCAATTGCTCACTCTGAAGCCAAATCATCGCATGAATTGGATAGGCTTTGCTGTTTCTCATCATTTAAACTCCAATGGGTCAAAAGCTGTTGACATCCTCGAGGCATATGAAGG
>c15445.graph_c0
GTTTAAACTGATGATATTTGTCACCAAGCAACTATAGGTGTGTTATGATAGTTGCGCTATAGAGCCAGTTCCTTTAGGCTTGACATGTTACCACCTATCACCATAATCACTTAACATCAGGTGAAATTTTAGCTAAAAGCTGAACCAATATACTCAATGTTTTAAAGTAGTAAAGTTCGTATATAGGAGATGACTTCAGAAACTACTAGATCCGGTTCTGACTGCTATTTTTATGTGATAAAATCCACAACGCGGGTTTAACCACGGGCCGCATCTAGTAAAGTCTAAAGAATGATCTGACCACT
>c15448.graph_c0
GTGCATATTGCTCATTATTTATTTTTATATTATTTTTTACTTCATTGGCATATACAAACTCATTACATGTACTCACTACATTAGTAACAATGTAAAATTGTTCTTATCAAGCCTCATGCTATCATAAAGAACATTATTATCTATAAATAAAAATGTCATGACTTACTGATTTTTATGGAATGTTACAAAGTATAAGGTATAAACCAACCAAGGTACTTTACATAACAAATATTTTAAGATTTATTTATGTATTAAAGATCTAAAATTTATAGTGTTTTCAGCCTAGAACTACTTGAATTCCGAAAATTTCTCGAAATATTAGATAAATATTTAGTAATTAGATATTGAGCTAGGCGATACGACATGGAGACAAGCCATATGAATCAATGTCTGTGTGCCTACTGCAGCACTATTATATGCACACTAGTATATTATGTTTTTCTTGTCACCTTAGT
>c15453.graph_c0
CGTGTTTCAGTTCAATAGATTCTCGTCTCTTTTCGACTTACGACATCAACAGACCGAAGTATACGTATTCGATACGATCTGCGTTCGCGAATTCACGTTTCTGGATTGATTAAGAAGAAGAATTCAAGTCAAGCTGTTGGTATCTACAATGGAAGAACAGTTCATACTTAGGGTTCCACCGTCTGTTTCAGAACGAATTGATCGGCTTTTAAGCGAGGATGCTTCTACTTCCGACGAAATCCCTTTGGATTTGTTTTTTTCAGAGGATGGGAGAAACGGGACGTTTATGATTGGAAACGACGAGTTCCCGGCTTCTCTGCTTGATCTCCCTGCAGTTGTTGAGTCTTTTAAAACTTATGATGATTGTGCATTAGTCAAAACTG
>c15459.graph_c0
GAAACCTCCAACATCAACGACTTTTCTGCTGGTGTAGCCAATCGTAGCGCCAGCATACGCATTCCCCGGACTGTTGGCCAGGAGAAGAAGGGTTACTTTGAAGATCGTCGCCCCTCTGCCAACTGCGACCCCTTTTCGGTGACAGAAGCCCTCATCCGCACGTGTCTTCTCAATGAAACCGGCGATGAGCCCTTCCAGTACAAAAATTAAGTGGACTAGACCTCCAGCTGTTGAGCCCCTCCTAGTTCTTCATCCCACTCCAACTCTTCCCCCTCTCCCAGTTGTCCCGATTGTAACTCAAAGGGTGGAATATCAAGGTCGTTTTTTTCATTCCATGTG
>c15462.graph_c0
ATTTTTTTTATTCGTAATGGATAAACTCAAAAATACTAAACCGATTTTTTTTTCACTCATAGAAAGCCATATTGTCGGTGAGTACTTTAAGGTCGTACTTTATTTTCGAAATCTACATTAGGGCAAACGAAGTCGCGGCCAAAAGCTAATGGTCTTTAATTTGATATGGACGCCACTTTTTTATTGCATAATATTGCATTGTTAGATCACATCGCATCACATGAGATCGTGACCTAAAGAATTAAGGAGTTTTTGACGGGATATTAGAATGTCATATCCACTACTTTATATTTCATTCGTAATCGCTGTGGGTGTGGTATTTGGCTCTATATATTGTAATGTTTTTAACGTAATATAATTTGGTTATTGTGCA
>c15463.graph_c0
GTTTGAATTTCTTTGAGTGCTTCCATACCAAGTTCCAAAGCATTGATAGCCTTGTTGGGCAAACCACTGTGGAAACCCTTTCCAGTTACCACAAGTTCCCATGGTATAACACCACCAGTACCAATACATGGTTGTTTATCAGCTGTGTCAATCCAAAATAGAGGACCTTCCTTTAATTTATCAAACCAACCATCCTTATCTAATGCATCCACACCAATCCCCTGGATAGATGCATTCTCTTCACTCGCTATGAAAATAGCAATCACCGATGATTTTAATTTTGGCTTCGTCTCTGCTAATTTCTTCATAAGCTCAGTAACAAGCGCCACATGACCTAAACAATCCGTAGTTCCACGTCCCCTAAGTTTATCACCATCCACACTCAATGAAAACGGATCAAAC
>c15486.graph_c0
GTTGATCAAAACGTCGATACGGCCAAAACTCGAGTTTTCTTCCAAGGCATTTCTCCCACTCATTACGAGGGAAGGGAATGGAACGAGCCGAGGAAGACTTGTAGTGGGCAAATGCAGCCGTTGGGTGGATCAAGTTACCCAAGTGGTCAGCCTCCATCCTCAGGAGTAGTGTCGAAAGTGTTGAGTTCGATGAAAAAGCCAGTGACCTTGCTCGATATCACAACTTTGTCTCAGTTGAGAAAAGATGCTCATCCTTCTTCTTATGGTGGCGATGGAGGAACAGATTGCAGCCATTGGTGCCTCCCAGGGTTGCCTGATACATGGAACCAACTTCT
>c15503.graph_c0
GGAAATATATATTAGGTCACGAAATGCAAAACTAGGTCATGAAGTATCAAGTAAGTTACGAATTAGGTCTTGATGTATAAATAAAGTTAGGAAGTATGAGTTAAGTCATGAAGGTTATTAGGTCACGTAGTGAATATGTTGACAAACGAAATAGGTGAATACAGAACTATTCGTATATGTAACAAAGGTATAATAATTCTGAGGTGCTCTCTCGCACTCTGTACGGTCATTCGGGCAGAGTGCGACAGCAATAAATTTCTGTTAAAAGATATTCTTCACAATACTTGCACTCCTATTAACAAGTTTCCCAG
>c15506.graph_c0
GAACGAGACTTTTACAGGCAGATATAGGACTTTCAAAGCATTATCCATGGTAGCTGTTACTACGATTTTTATTTAGACTAATCAGGAATGATAAAGTTTCATGGAGTTAAATTCGAGTTCGTAAAAACGAGAATTCACAATATATTTAGATAAAACATTTAGTTTCTTTGGAGACCACAAACCACTAGTAATAAAATAAGATTTCTAGATAATTATGCTCTAACGAATGGTTTACTATTACAGTGCGATACGACTATAGACTATATTCAGACACGGCATTATGTTATATAATAATTACGTATACATGCTACCGGCTCGCGAAACGTCACATGTAACACCAAATGTGATACTTTACTCGGACCTACGTACCTACGTAGGGTTCATGAACATTTTATATTTCTTACATTTATTTACTAGC
>c15515.graph_c0
GTGGGAAACAGAACTGTAGATTTATTAGAATTTGAAATTGGTAATATATCGTGGGCTTGCGTGAGGTGATTACCCATATTTTCCTTTGAGAAGAGGCCTATGGTCTTTTAGTGGGTCTCTTACTAGCTGATCTAATGTATGATGTGTGATCAGTGGTTCTAGAGGTTCGGTTTTAATTTTGTCATAACACAAGAAATCTCTTTAGATGAGTGTCAAAGTATTATTCGAAGTTACGACAACAGTCAAGAGATTTGATATAGTTTATGTCTTTAGGAAAACTCATTTTCATTTATTAAAAATAACTTGTAGAGTTGTACGAGATAAGTCCGTACGCGCAGTTCGCTGTCGGCTTTAGGACTTTCGGTCACGTCGATAACCAGGATATACCGAAACGACACAACAAACAAAGATATGA
>c15520.graph_c0
AGATTTATAGGGTATTAATTGCTTAACACCTGATTAACCTTGATAAGGACATATACGTAGTGTAGTAAATAATTAAATGGTGAGTTAATTTTTTTACCTCTACTTGGTGTACCGACTACCTATTTATGTATTTGGAGCCATTCCATTTAAAAAGAATTAAAGTTATTTTTGACCACACCTCTCTCCCTGATTAGCAACAGTAAGTGAATCCTTATCCTTCTGGTTACGACACCAGGCATCAGCATATTTTATCCAAAATTTCTCATCTTTACGCGTTAAAAAAAACGCGAAGTATTCAAGTGGGGATGTGCTTATGACCATACGATAGAAGTGAAAAATTATAAATAAATATATGCACATTAAAGTGCACATAGATATCTAAATGTAAACAAATAATAGCAACATTGAAATACGTACAGCATATACATATACAAATGCTACACCGAATTATATACAAAA
>c15538.graph_c0
ATTTAATGTAATAATTCTGCTATTTGTAAGTTAACATTACATATATAAAATGATAACAACACAGTAAAAATAATATAATATTGATAATTTCCAAAATTAGATATAGATATGGGTGTTATTGGCAATATCGTTAATTTTCTTTTGCATTTGCATTAAAAAAAAATATTTGCTGGCATCCTGCTATGTCAGTGATATTCGGAGATGTTCGCACCGAATCGTGTGTCGCGTCGGGTCTTTTTGGCATTCGTTTTTCAAGATATCTACTGATATCGTAAACTGTCATCGGTGTCCAAAATCGGTTTTAATGATGAGGATTTTTCTAAACCAGCTTGGTTAGATGAAAATCTGTCGCCAAATACCTGTTGGTGTGTTCCGGCAGTTATTAAGAGCCAGTACCCTCTAGGTTTAGGGTGTTTACCACCTTGTAATGTTACAACAGGTAAAATTGTGGTCAAAAGCTGAAA
>c15539.graph_c0
GTTATATTTTTATAATCTGGCTATTCTGTCACTCTTACAGCGCTATTGTTAAGTAATTCCATGATATAATACCTTCCCTTGATCAATAAGGGTGTGTCTACATTGTCAGTGTTTTCAGAGTGGTGTTACAAGGATGAAATAAATGAGGTGTATCAACAAAAAAGCACAATAGCATTTAAAAAGCAACGTTACAACCGTTATTAACAGTTATACGTTAATAACGTTATCAGCAAGCGACGCACACAAAAAATATCTATAAGTATAACACAAACAGATCACAGAAACGGTTATACGTTAATAACG
>c15542.graph_c0
GTTTTATTATCTTTTTACTTAATAGATATTTTTGGTAGGTGTATACTTATTTGATTTGAATATATCGTTATATAGTTCAAATTAAACATTTAAAATATTTTTTATATTTTTTATTATATAGGGACAATTACGAAATATACTGGGGTTATTCCGAAAATATTTAATAAGAATTTTTATTCCACTCCGGCTCAAGGTTTATATTTCTTTTTCTATCGTAATTACCTCTCACAGAAAATATCAACAATATTGTTAATAGTATCGCTAGTCTAATTTCTCACAGTACTGATATTTCGGAATTACCCCTAGAAAGTGACTGTGGTTCTCAACATTTGAGTTATTTAATAATTTAGAAATATAGGGTTCCAGTTGGTGGAAAAATAACTCTACGTCAGCTAATGTCCATGGTATGACATAAAAATGGTCCTAATTGTTAACATAAATAAAATTAATAGTGGAAGAAA
>c15565.graph_c0
AGTGCAAGTCAAATGATAATAATGTCTATATTAAATAGTTAATAAACTCTTATGATTGCAAATATGTATTACATGAAGAAAACCTCTACAAGAGACGAGACCTTGGTAGGTCCAAAATGCCCTAGTCCATCACTAAACAGTCAATCTTTACAGCACAGGTCTAGTTACTTTTAATATATGGCTTGTGTTGACACATAAGAAGATTATAAAAATAAATTTAAATATTCACTCTATCTAACAATTCACCTTTTCAGTATCACCATATTACAATACTAGAAAAATAACATTTAGGTATTAAAAAATAT
>c15576.graph_c0
TGGAGGAAACTGCTGTACTGAACAATACAGTACTGACACATGAGAGTCTATAAAAATCTCCTGTAACACCAAAAAACATAGATTTGTCACTAGTCACTTTTTAAAAAAAACAATTGTTGCTATTGCCGAGTCTAGTCTGCATGATTTTAGCCGTGATTTTGACTCGCCGACAGGTTTTGAGAAATCGCAGACAAATGCCTGAAATCGCAGGCAAATCGGTGCTCATGCATGCGAGTAACAATCACACAGTATGAACTATCAAAGATGCGATCTGAGAGAATCGTCGATGAGTCGCTGAATATCTAGAGCCGCCA
>c15577.graph_c0
GCCAAGTCGGTCTGATTCGCCGTTATAGATGTTTTACATAAAAAATATAGTAGAACTAGCTTTTGCTCGTGTTTTCGCTCGTGTTAATGTACTTTTGAACAATTTGGACATTTATATACCTACAGACGCCCGGGAACAGTACCTACTTATTAGCTAAATACCTACCTAATGTCTCTTTCTGTATCCCTGAAAACGTGTGTGCAAAATTTCATCATTATCGGTCGAGTAGTTAAGACGTGTAAACGTAACAAACAAACTTACATCCGCATTTATAATATTAGTTAGCATTAGGATGCGAGTCAAGCTCTGTCGATATGAAAAAAGTTGTAAATTG
>c15582.graph_c0
ATTGAAATGTATGGTGTAGAAATCGCGTTGATTCATTATAAACTAGTGATGAGTGTTATTAGTTAAATATTGAAATTCGAAACAAAATTCGGAAAGTCCTATATTGCCTGATTTATTAATATAATAATTGCCTGATATATAAACAACATTTAGCTGTTGTTTGTTACAATGAATCTCCGATACGGTTAAGAATTGGTTTTAATGAAACGTTTATTGGCGATACTTTACGCAGGTAAATATCATTAAAGTAGTCCATACAGGGTAAGCAGTGTTAAAAAAGTTACCATCGGTAATATAGAACCGGTAAAAAAATTGCAGAGGGTAGTAATGATGGGAACGCTATTAAAAAAGTAATAGATACCACACTTATTCACATAATCCAGCCGTTTCGGAGATTGTCCGGAACAAACAGATAGACAAACAAATACAAAAAAATTGGATTTTTGTTTCATATTTTTTTAGTTTTGAATTCATATCCACTCAGTAAAAAACTATTAAATGCAGACACTTAATTTTTATTATTTGTATTCATAAATGAGTTGCAGATTTAAAGTGAACAGCCATTTTGGAGCACAATCAACTCTGTGTATTACAAAACAATAAAAAAGATTAAGCAGTACGCGAATAATCTATATATACATAAATTTCTTCTGTGCGTGTTAA
>c15592.graph_c0
AAGAGTTGTTACTCATAATAACATGCTGGACTCGGAAGTTGATGATAAAGAAGGAGATGCCAACAAGACTCCACAGAGCTCAACTCTTCAATCCATTACAAAAGACCAGCATGTCGAAGATCACTTAAGAAAGAAAACGAAGACTAATGGCTTTGAGAAAAGTCTTGATCAAGGTCCAGTTTTGGATGAGAAGCTGAAGGAGGAAATAAAAGAGAGATCAGATGCAAACAAAGATCACGCAGCCAATCACGCCAAGCCGGAAGCAAAGTCAGATGATAAAACCACTGTTTGTCAAGAGAAGGCAGTAGGAACCCTGGA
>c15597.graph_c0
AAACCAACTTGACGGAGTTTAAATCTACATGGCAGGCTTTGATGGATCGTGTGATAAACAAAGTTGATGGTTCATTGTACGCCAACAGCATACAAGAGCTCGGGTCGTTCCCGTTCAGGAGCATTTATGCCATCGCGCAATGCAATAAAGACCTAACCAAGTTGAACTGCGAGAAATGTTTACAACATCTTAGGATAGATAATAGGTCATGCTGCCGGGGGATACAAGTAGGCTATATTGCAAGGACCAGCTGTTTCATGCGATGGGATCTACAGCCATTCTTGGGACTATTCATAAATGGGATGTTACCAACTCCCCCTTCTGAATTAGATAATGGTCACTCTAACACAACCA
>c15603.graph_c0
AGGCAAGCAATCAATAGTGTAACAATAAAAAGTAAGGAACAGGGACAGCGCTTCACGTTGCTCACGATAATTACTATGAAACTCCATTTCATTATAGTATCATTGTTATAAGTCACAATACGTTAAAAAATATCACGTTATCTAACAGCAGGATAACAGCTTGTAACAGCAGCTGCAAAATAGCAGCGTGATTAATTACTGCTATATAATCGTTATTGGAATTGATTTGTGTGGTAACGTTGCGATTGCTGTAAGGGCTGTAAAATTAGCGGGATTGTTCAGGAATTTATTCACGTTCAACCCAGGCTTTGGTCACGTTTTAATAGAACCGTGAGGCTTACTTTTCAAAAGTATTAATAAATAAGGGCCAAACAGGTTCTAGGCGTATCCATTAACTCAGAAAAGAGATCGTTACAGACTATTCATTG
>c15604.graph_c0
GACTTTACTTTTTGTCACACAGGACATTATTATTGGAAAATTAACAATAAGAAAAAGAGTTATTTTTGAATTGAACAAAATCCGAGGCTGACCTTTTGATTATCTACTAGTAATATTTCCACAAAAATGATTAGTAAATATCATTTAAAAAGAACAAGTGGTCGGACGAAATAATTGTCCTGAAACAACTATTACTTATTAAACACGAGAGTAACAATATACTACATATGTGATATATATCACCAGATACCCATCACAACGCAATAACTATATACAAATAGGATATATAAATCTTATGTATATATCTTA
>c15610.graph_c1
GTGAGCGTTAGGAGACATAGACTGCTTGTCACGTGGAATGACAGACTGTAAGAGACAAACCATTGAAATCCATTGGCCTCTGTTTAACGAGTCTCCAACAAACATCAATCTCTTTCCTCTCAGCTTCTCCCACATTTCTATCGCATTCCATCTCTTCAAGTTGCAGGCATGAGGTTGCCATCTCCAATGCTGATACTCCAAATCCTTCCTACCATGCTTCTGACAAGCCAACTGGTCGGACATGTAAGGACACTGAGATTCCTTGTGTAAAGGGTATGATGATGAATTATCAAAGACCCATTTCCCAGAAAAGACATCACATTT
>c15615.graph_c0
GTTGCAAGCATTTAATAAAAGTGTACAATCGTTTCTTGAAGGTTTGTAACTCGTAATGATTTGGAAACACCGCCGCTGGGAGTTGATTCCACAAGGTCGAAGTACGACGTAGAAATGACCTTCAGAACCTTATTACCTTGACAACATATTTAATGTAACAGTTGTAACCGTTCAGTTCTACACGAGATATAATAATAAAAGCTAGTTAATCTAGAAGTTCTATAATTATATGGTGATTAAAAAAAAATCATTATATATTTATTTTTGCAGTAAAAAAAAAACATTTTCGCAAGGATGTTATAAAATATTCCATATGTGAACAATTTTAAATATTATATTGATGCAAAGTAGTATTTAAACTGTCAGATTATCATTGAATATTGATATCATTCAATATGTCTAATAGGTCATAGTTCATTGTCAAAATTGGATGAAATTTCTTTTCCATTAATATGTGGCCAAGATTACAATGATTCAAC
>c15616.graph_c0
GGCTACAGAGAAGTCTGTGCGAAAGGTATATAAAAAAGGTTCAATTCAAAATATGGATGACAAAATTACTGAAGCAGAAGAGAAGTGTGACAAAGTGAAAAGAAAAATAAGTTTACTAAAGAAATTAAAAAAGATAAAACCGAAAAGACGTAAAAGCATAACAACAGTGAATAAACATTCACCCGTACCTAGAAGTGGATCTGAGGCAGTGGTAAACATCCAGAAACACCAAAAATCCAATGATAAGCCAATAGTGGATTTATTTATCGAGTCAAGTTCAACAAAGAAAGAAAAAGGGTATAGGCAAACGACCATGTTC
>c15618.graph_c0
GCAGGAGATAAAAGAAAGGGAATATGTTAATATTAGAAGAAACAATTAGTTTTTGAGAATTTTAAAATGTCAAATTTATGCCTATTGATAGTGAGAACAGCAAGACTGTTCTATGGTTAATTTATTTCTAACACTTGCTGGAACTGACTGTTGAGATGACCTGTGCACTTGTTGTATGTATTATGATCTCAGTTTCAACTTAAAGTAACCAATACAGCATTAATCAAGTTTCATAATCAAATTATGTTGTTGTTGGTTAAACTCAAATATAGTTAAAAAACTATCCAAATAAACTCAAAATTTTATAACTAGTCTTGTTGTTTATATAATAAAT
>c15620.graph_c0
CAATGTAATCACTTTATGATGCTATGAAAGGTCAGAGAAAACACAGTAAGCTACAGACAGGTGTGGTGTTCTGACTCAATAAAACTTTAATAACCTTATATTATGTGAAACTAAGAAATAAAACTTTTATTTATCTAAACCCATCCTGTAGTTTTTGAATGATATGTGCACAATTACAGATTATTTTATTTGTGAAAACTACATTTACACCTACAGCTTGGTGGTCATAGTCCAGTCTGGAAAACACATAGTCCAGTCTGGAAAACAATGTTCATAAGATTCTCCATGTGGATGCCAGATTAATCGTGTCTCAAAATAAGGAGCCAAAGGATATTTAGAACTTGAG
>c15636.graph_c0
GTGGATTTGCTAAGTAGACCTTAATTATAAATAAGAGATATGTAAAAAAATATTGAATTTAAGAAAAAAAGTCACTAAATTGTGGTTACACATTTTTCTTGTAACTTTTCATGTACCCTCATATGTACAAAGAACAATAAATACATAAAAATCTTTCAAGTGTACTATTATTTTTGCTATAGATTGCCCATTCTATTAAGGAAAGTTTTGGGCTAAATCAATTCATGCTACAACTATAAACTACTGTAACCACAAATGCCAGGTAAGCTGTAATAGCATTAATAGGCATTGTGCATACAAAACAGGTATGTGCAATTCAATTAAAACAGGCAGAATTGTGGGTGACAACATCTCTACATAGATACTAAAGCAAACAGATTTTTAAATGTACACTAATCTATTTTTTCAAGATCTTAAATAAAGTTGTCATTCAACTGAAACAGAGATAACATTTTCAATATTAATTAATAACATTT
>c15644.graph_c0
ACGTCGATCGCAACACGGTGTATAAACATGCTAACATCTGAGCAAACATCGCCTCTTGGCTTGGCTTGCCGTCTTGGACATATCACATTTCGGTCAGATCCAACACAATTCGAACTAATACCAGTAGGCGATGAAAACGCATTGCGTGCTACAGCATTTAATCCGGCTGTTCCTACGGTCATATACGTGATGGGATTTTCTGAGTCCACGACTGGACCTAGCACGACTACGATAAAGAACGCATATTTCGCGGCCGGAGATTACAATCTTATAGCCGTTGACTGGTCGCGACTCATCGTTTTCCCATGGTATATATCGGCGGTACGTAACACACGTTACATGGGTGTTCGTCTAGCGAACTTTGTACAATTTTTAGACGGGG
>c15665.graph_c0
GTGGTGCAGCATTGTCCCTCATTGGTCTGAACCTGAGGGGTGGTGATCTGTCCTTCCTGGCCTCACGGGATCTGTTCCTGACCACCTTAGAGTGGATTGCACAGGAAACGCAGTACAACAATTTAGCATAGAGTTTGGGGAGAGCATATACTTCATAAACACTAGCGTCAGCGATGTCACGGACTGCAGCAGCCTCTACAATATTCCTAATGACAAACTTCTTGATTGCCTTGTCTTTTGGTACACATCGAGCACAGTTTGTGCAACGAACAAACTGCACATGACCACGCCCCTTCTTGCTTCGTCCATTATTTCTTCGTTTCGAAGTCATTATGGAC
>c15677.graph_c0
AATTGGAGGCATGATGAAGACTCTGCTGCTGTTTGTGGGGCTGCTGCTGACCTGGGAGAGTGGGCAGGTCCTGGGGGACCAGACGGTCTCAGACAATGAGCTCCAGGAAATGTCCAATCAGGGAAGTAAGTACGTCAATAAGGAAATTCAAAATGCTGTCAACGGGGTGAAACAGATAAAGACTCTCATAGAAAAAACAAACGAAGAGCGCAAGACACTGCTCAGCAACCTAGAAGAAGCCAAGAAGAAGAAAGAGGATGCCCTAAATGAGACCAGGGAATCAGAGACAAAGCTGAAGGAGCTCCCAGGAGTGTGCAATGAGACCATGATGGCCCTCTGGGAAGAGTGTAAGCCCTGCCTGAAACAGACCTGCATGAAGTTCTACGCACGCGTCTGCAGAAGTGGCTCAGGCCTGGTTGGCCGCCAGCTTGAGGAGTTCCTGAACCAGAGCTCGCCCTTCTACTTCTGGATGAATGGTGACCGCATCGACTCCCTGCTGGAGAACGACCGGCAGCAGACGCACATGCTGGATGTCATGCAGGACCACTTCAGCCGCGCGTCCAGCATCATAGACGAGCTCTTCCAGGACAGGTTCTTCACCCGGGAGCCCCAGGATACCTACCACTACCTGCCCTTCAGCCTGCCCCACCGGAGGCCTCACTTCTTCTTTCCCAAGTCCCGCATCGTCCGCAGCTTGATGCCCTTCTCTCCGTACGAGCCCCTGAACTTCCACGCCATGTTCCAGCCCTTCCTTGAGATGATACACGAGGCTCAGCAGGCCATGGACATCCACTTCCACAGCCCGGCCTTCCACGAGAAGGCGACGATGACCGGACTGTGTGCCGGGAGATCCGCCACAACTCCACGGGCTGCCTGCGGATGAAGGACCAGTGTGACAAGTGCCGGGAGATCTTGTCTGTGGACTGTTCCACCAACAACCCCTCCCAGGCTAAGCTGCGGCGGGAGCTCGACGAATCCCTCCAGGTCGCTGAGAGGTTGACCAGGAAATACAACGAGCTGCTAAAGTCCTACCAGTGGAAGATGCTCAACACCTCCTCCTTGCTGGAGCAGCTGAACGAGCAGTTTAACTGGGTGTCCCGGCTGGCAAACCTCACGCAAGGCGAAGACCAGTACTATCTG
>c15681.graph_c0
AAAAAAAAATCATTGGGTATGTAAGTAATGGTTTTTTTTTTAATAATTGGGTGACAGATAATGGCAAATAACTGTAATAATAAGGAATAATAAAATATAGTTTGTGGTCATTCAATATACGGTAGCACTTCACTACGATAAGTGGGCGGTGCCACGCAATGAAATCCATTATTTACAATACATGTTACCGAAAAAAATACACAATTCATAGGCATGAGCTGTCAAAGAGATCACCTTAAATTTGACAAGGTATAGCTTAAATATCTATGTAAGTGTTATCTTTAAGTCATTTTAATTCTAACTTCTTACTTAATACGTCATTTGAACTTACTAAATGTACATATTGTATATTCAAAACACGAGAATAATTTAAGTCCACTATTTTTGTACCCATTTTACAGTTTCATTTTTA
>c15685.graph_c0
GACGGTTTCAGAAACTGGAATAATTTTACAAAATCCTTTTAAGACATTTAAAAAAAAATGTCTTCCCTCAATATCGAATACGACAAAGAATTTAAAAAAGGAATAAAAGTAAGAAATCTTCATGCCGACTACCACTGTATTATAAGGAGAGTATGTAGTGCAGTTGTGTGATAGTGAATCTATTTAATTATCTGTATGAGTGCAAATATATTTCTTTCAAAGCAAACAGCATTTAATTTACAAAAATGTTAAACCTTGAGCCATGTAGTGCTGTCCCATTTGCAGATTGTTCTAGAAGGACGCTGTTACCTCTAACTGAAAGCCTTTATTATTCTCCTCGAAATCCAAAGAAAGAATACCTATAGAAGTATGGAAATTTTTAAAAGTAGAT
>c15688.graph_c0
GGCGCTGTCATTAAAACTTCTTCTCGTAGGTGTGATAGCCAATGTTTTAGGAATATTCATTTTACTTCTTGAAGTGTCGTCAGTCGAAGCTGATATGTTTATCAAATTATTAGGTATTGTATTATATAATTTATGGCGCACATTTTGATTATTTTCAGGTGTTTTTGAAATATCAACAATATTATTTTTCTTTACATCATTTCTCTCTCTATCATCTCTTTGTGTGTTTATTGGGTTTCGAAGTAATTTATATCGAAATTGTGTAGAAGGCATCATTTGAATAAGTCTTGTATTGTGACTTTCAGTTTGACTATATGTGTATTTCATTTTATTTATAATATTTTCTAATTCAGGTAGACTTAGAGGTAGACTTGTACTGACGACATATTTAACTTTATCTTCGACATCGATAAGATTCTCATTGCTATCTCTAAAATATCCCGGTTCTTTCAAGTACATCGGA
>c15699.graph_c0
TATTGGTGTTACAGTTATAATTTGTAAATATTTTTAATGAAAAGGCAAATGACATTGTTACAAATACAGTTGTTACATAATAACAACTAACCACCAGATGATGGTTGGCAGGTTTGGATATATAGTGAGTAGCACATGTTTGTGTTTAGTCTCTTTTTTTTCGAATTATCGTTGATAATAGCGACCATTTTTACTGTTACTGTCTCCTCAGAGTAGCAGAAAGTCACCATAGACTGTTTCGATGGTGTACATGCTACTACATATATAATTATTTTAAAGGGTGCGGTACGATTATATTTATATTCCAAAAGAATAACTACTTAGAGTTTCAG
>c15707.graph_c0
AGCGAAGCCAAAGAATCCGTTACAAGCACCGCTGAATCCGTCACGGCTTCTCTCACTGATGCTGAGAAAACCGTTAACCAAACCGCCAGGAGCACTCTAACTGACGCCGAGACAACCGTTGCAGCATCTGTTGAAACGGTCAAGACCGAGGCTGCAGCCGCACCAGACAAAGCGTCTGGTGTGTCTACACAGGCTAAGGATGCAGTGGACAAAGCTCTTTCTAGAGGTATAGAAGGAGCCAAATCTTTGCTTCAAACTTTCGAAGCGAAGAGCAGCGATATTTCCTCAAAGCTTGTTGGAGGTGTTACCAATCTTGTGAGTGGAGCATCGAGCAGCACCG
>c15711.graph_c0
GGCACGCTACATTCATTCACTGTTAACTGGCGATTTCTTATCCGTTGAAATATTCCCTCGGACACTTCAGATTATCTTTCAATAGGAGAAACCTTATTTAAGATTAGTATGTCATATTTGGCTGTGTATTTTGCAATGTCGGTAGCGTTTTACGTAATATTCGTTCAGTTATTGTGCACAAGTGAAGCCCATAGAAAATAATATTGCGGAGCATGGATTCCGACTCGCTAGTCAATGATGGCAATAAAATTGTAACGTAATTAGCTATTTAGCAATAGCAATAATAATTTAGTAGAAGACAAATTGCTAGAGAGAAAAAAGAAGTGTTGAGAAAGAGAATGTAAGAGTGGTTATAGTTACAAAGAGCGCGAGAGCTCGCTGCTC
>c15714.graph_c0
GTCCCTGAGGATTCACAGGCCACTGAGATATCGTCTTGCAGAAGACACGGTCACAGAACCAGCATATGCTTCCCACTAAGATCGTAGCAACATACCATTTCGCAATCCTTTTGGCTGCTGTGTCCTCTGTGTGAATGTAGTACTTGTACATCCGAGGGATGCATAGAAGGCAAAGTATCACGTAGTGGACCTTGAAACCAATTCCAAACCTGAGGTAAGCATGGACTATGGCAAAGGCAGCACCGTAGAGGAAGAGAAAAGTGGGCATTGTACTTCGGTAATGCCAATCTGGTGAGTAAAGGATGTACATGTATAGAAGTATCTCCCACACCATTGGGGTCTCATCACTCTGTTGTTGC
>c15729.graph_c0
ATATTTTAATATTAAATTATTTTACAAATTACATTAGCATACAGAACAGCAAATTGTCAAATATATATTATACAAGGATATTTATTATATTTATACAAAGCAAAGAAAAGTCAACGCAGAATAAAGTCGTAAGTAGCCTTTTTCGGACGTTTACATTGATAACGCTGGATAAACCATGAGATATATATAGAAATAATGTTCTACAGATTTGTTTGTCTGAAAATTTCCTACAGAAAAGTCCGCAATGATAAGTCTAGTCTATAAGAATAAACCACAGTTACCATTATTATCATTTATATGTTGTCTAACAA
>c15735.graph_c0
AGGGACAAAAATTTAGATTTCCAACTCCAACTCACTATTGATTGATTGATGTACCAGTGTTACACATTACGCTTTTATTAAATATATTAATTTGATGAAGGTTTTGATGCAGACAGACTTGGTCTTAAAATTATAGCGACAGTATATATAATGTTCTGTATTATTGTTTTTATCTCAAGGGATTGTTCTTTTTTGTTACATAACATCCAACTGGATGTCCGTGTATCTATGAAAATCAGCACTGCAGTACTGTTGAACTGTTGCATATTGCTGAATGGGGTTGTCAGTTGTTGGATTTTTTTTATACATCTGTGTATCTATATTTAATAGTTTTGTTTTAGGTTCAACAATAAAATTATTTCTTACATTATAAAGCACGTCAATAGCTTCTAAACAAAAAATATTAAGAAAAACGGTTAACAAACAAAGGCGAAGAAGGTATGTGTAGATTTTTTTATTTTGTCGTCAATTTAAGAAAATTCTCGAATGAGCAAATCTAACAAAACAAAATGTACCTGCAACCCCTAAGGTACACTCTCATACCATTATAACAATATTACAGATTATAAAATATAGATGTTATGAAAAAATAAAATATGTTTATTATTATTTTAAATTTTACCTGTTGCACTGTATAAAAACAATA
>c15754.graph_c0
ATGTGTACTATTTTATTTTTGAATTTAAAATTTTTTCATCCTCTAAGAGAGTACTTAAAGCTAATATTAAGGGCTCGAATATTAAGGCCTCAGACATCCATCAGAGTCCAACAAAATTTTGCGTCGAGACCGAAATAACAAATAGTCGTTAAAAAAAAAGCACCCTAGTCTAAATATATAATGTAACCAGATGATAACCTTCCCCTCTAAATTTAGAGGTTTTTAAAATCTAACGGGTAATATAGGCGTACAAAAATATTAGAGGGATTTTTAGCTAAAAAAATTTTTACCGGTAAGCTTCCGCTGAATTGATGTTGAAATTTGTTTGATTAAACATTATTTTTTTAAATTTTTCAGCATTCACAGAG
>c1576.graph_c0
GGTCCTTTCATTCTCATCACCAAACCTCACAAACCCATACCCCTTTGACCTACCAGTATTAGCATCAAGGACAACTTTCGCAGCTTTAACCGACGGATACTTCTCAGAGAAGGTCTCGTGCAACAAATTATCCGAAACATCTGGTGACAAATCCCCCACGAAAATAGAGAGATCAGGTCCATTGTTCTCTAACCGCTTCTCACCGGTGCTAAAACTAGCCCAGTTCAAACGAAAAGGTTGGTCAGTATTTGGCATAGGCGCCCCGTTAAACTCCTGCAAAACCTTATCAGCTACATCATGGGACTCAAACTCCACAAATCCATATCCTTCCGATGAACCATTGTGCTTATTACGAATCACCTTCAGCGAAACAATCTCTCTCTCTTCGGCGGAAGTAAAAGCAGAATTAAGAT
>c15764.graph_c0
GTTTTTTATGTATGCGGTCTTAGCACATATTGTAAATATCTCGTATAATTCTATGAAGTAAGGATTAAGACATCGGAACATAGATAAATAATCCAAACGTGAGGTTTTAAAAATAGCAATTGATCAAAATTTCGCCTCAATATAGGAAAACATGGAATGTACGAAAACATGGGAAATTGACAAATATAATCACAAATAAATATTCGAAAAGCGTTACAGCGAGATAATTGATACCTAATTATAACTTATTTTTTAAATTCAGACCATGCCTGGCTGATTTTATTGTATATCGTTATATGACTATAAAGGTCTAT
>c15766.graph_c0
GCAAGCGTCAAAATTGAGTGAGGTAAGATGCAACATCGATCCATGCGATAAGTTAAAGGGTTTCGAACTGCCATGAAATGACCGGTGCTAATTAAACAGTTTGCATATTAAATACCGCTGGATAGGTGTCAACCATGAGTTACCATCGCGCTGTGACTGTGGGGTGAAATGCTAACCCATTATACTCTTCAATTTTTCTATCACTTATGCTATATTTAAACTTCCTCATAACTTATTAAGCATATCAAAACCCTCTACCATTACTCGTATGAAATGGATTGGAATCTGTAATTTTCAAGGTATGAAGAGCTCACCCCTCGTCTTTTTACCCCTAT
>c15774.graph_c0
GCCCGATTTTGATGTAATTTTTTGTGCGTGTTTCAGTGGATCCGAGATTCGTTAAGATTAGCAATCGGACCCGGTAGGTGACACTGTGGTCTGATTCTAGGAGTTTTTTAATTTACAGGGTGGGATAACGTCCGCCTGTCCTGCTAGTTTCAAATAAAATAAATAGCAATAATATCCCAGCCACTTATTGTCGACAAAAATATCGACTATATGTTAATTCTACACATCACTAGACGTCCGTTCAGCAGACGGTGGCATCAGACAAGATTATGGTCGCAAACGATCTCTCTGCCAGCTCTCATAATAAAAATGTGACGGTCTACGAATAAATTGCTGATCTTTCAGTTTTATAATTCAATAAAATATAGATTTAGGGTTATGTTTG
>c15775.graph_c0
GCGTGTCATTACAAAGAAGGTACGAAAATAATGAAACGTTTTATTTCCCTTTGTGTTTTTATGCGGGGAGAAGTTTTCTCTTTTTGTTTAGCTTAATGACGAAGATGAGCGAAGTGGAATGTGCTTCGGTAAGAATATTTTCGCTTCGGATTCGTTTGTATTGAAAGAAAATGATAGGTTTCCTTTCTGAACGTCGATATAATCATGTTTTCAATTACACATCTTTTATTATATAGTCGTGGGAGATCTAAAAGACGTTCATTAATATCCTATTGAAATGATATGCAGCAAGACTTAAGGTCACGACTCCAATTTCTATATTGGTAATTGCGCTAGTATGGACCGGAGGAATTGTTTTCCGCATGCTTAATAAAGCTTAGATATTACAGTATTGTTATCAGTTATAATGCACCAAAAATATTACTTCATAAATGTCATGGTACAGAATGGTACTGTACTAAAAA
>c1578.graph_c0
TCACCCGTGTTGTCACCCTTTTGTCTATCCCGTTGCTGGTATAGGAGTTGACTAGCTTTAGAAAAAAAGCTTTTCTGAATATGTCCCATTTCCCTTTTGATATGCAAAGAAATAACAATTCGTACAGCTTACTTAGATTACATTGATCAGTGTCATCTAGTTGAACTTGATAGTTATCTAGCTAGCTATATCCCTAGCTAATACATCCAACGCCAGATGGCCATAAACGATATATTGACATTTTGATATTTTATTCTCATAAAACATCGATGTGTTGATGTTATCGATATCAAAACATCGATGTTTAGTCAAAATCGATGCATATCGATCATCCCTAATCCTTTTAGATTTTAAAACTGCAAAATGTAAAATATACTCAATATGTTTCAGCGGAATTTAATGTTAAAGCGAATAGAAAGTGAGGGTAATTGTGTATTTATGCGTTAAAATCCTG
>c15780.graph_c0
GATATATTAAAATTGATTATATGAATATGTAGAGTCCTCGCCAATGTTTATGTCCACTGTGAATGTAATATGCATGATATCAAGATAAGGATAAATAAATGACATTTTTAGATTCCTATAAGAATATTTTAATTTTGTTATGAATTAAAGTCTGATCTTAAGGCTAGGTGTCCTCTGATTATAAAGTTTGTTGGATTGTAAAATTCCAAATGAAAATTGATGGTATATCTAATCGTATTGTTACGCCTGTGGGTAAATAAAATACCGTTTGGGTCGAAATAAATTTATTTGTAGATGTAAAGTCAAAATTTAAACAGATTCATTATACATATTTTCATTATCTAGCGAGCTG
>c15783.graph_c0
CAGCTAAACTAGACAGAGGTTCCTTATCACCAACATAAGGAACTTTAGCAGCTTCTTCTTCTTGAAAAGATGGTTGATCTTCCACTGATGAACAATTTCCCCATTCTTCACCCTTAATTGCTGAAATCGATGCAGCTACTTCCGCTTCATCCTTCACCATATCAATCTGATTCTGCATCTTCACTACTTCACTAAACTCTCTTCCTAGCTTATTATTAGCTTGATCAGAAACGAAGATCGATTGAAGAAAAGATTGGATTGTGAATAATTGAGATCGTTTGCGACCTAAATTGAAGCAGGTTGGGACTTGGGAACCAACACTAAGCAATGGGGAAGGAGGAAGAG
>c15785.graph_c0
GCTGGACTTGTTTTTGTGTTGCAGCAGACACTACGTTTATATCAGATGCTTTCATTTGCATTGGCTTCAAACCAGCATTTGTTTCACTAGCTGTGATTTCTTCTTGAGCTTGTATCTCCATTGAATCTCTGAAAACTTTACTTAGAAAGCTTACGTCGTCAGACATTACTCCAAATCCTGTCAACAGCTTCGAACCGAGCTGTAAACTTGTCTCTGCATTTTCGAGAATTGCATCTGTGGCTCCTGCTTTCTTTAGTTCAAGGAGATGCGGTAAATCTTGAGCTCTTGCGTAAATAGGACTCCCGGGGAAGGCAAGACGGAGTCTTTGAACAGCCTCAGTGGTTCTCTTCTTGCCTTTATACATTATCATGATAGCTTTAGGAGATGAAACCCCTGCAGATTGCAAAACCGATGGTCGAGATCCGTCTCCATACAATATCGGGAAACCGAGTTTCCTTGATT
>c15790.graph_c0
ATTTTATTATTTAAAGAGGTAAAACAAACTATAGCAGTCTTTATTCAGATAACATAATGTGGGAAAGAATAAAAGAGACATACAGTCGAAAGCGGCCATTACGACTGCTCTACATTTTTCTGGCACCTGCTTAATATCAATGTCACTCGTTTGAAAAAGGACTACATATATGTGATTTGAATATCTAGTTTAGAAATAGTTTGTAGTATATAATATACCCCATATGATGGTTGCATTTAAATAAATTAAATTTAAAATTGTTACCTTTGTCCTTGTCAATTTATCATGTTTGGCTGCTACCGTTAAGCTATTGTGAAATTGGTGCCAAGAATACGTTATCAATAATTTAATAATTATTGTATTAGGTGACTACTCAGCAAGGAAGGTTAAGGG
>c15797.graph_c0
CATAAGAGAAACGATCATAGACACTAGAATCGTAAATATTGAAAGGAATACAAGTTATTGAAGTAAAAGGAAGTGTCGTTAATAATTTCATTAGTAGCCAAACAGGTTACACACCCATATTAATCAAACGTGACACCGTCAAATTGTAAGAATTAGAATTAATTAATAGATGAAGAATGATTCGACAGTTTGAAATGTACTCGATTGTGGGTCAAGTTGTTTATTAATTGCAAATCCGCGTGAACAAGTAGGACCGCCATTGTATGTTTGTAAAATGGAATGAAATCCATTCACTTTTAAAACGGGGAAATAAGTTTACAATTTAATGAGATACGCACTTTGTCAAAGAAAG
>c15797.graph_c1
AATAATGATGTATAGAAAATATTCGATGGTGTATTTCTTTAAAATGATGTACAAATAAATGTCCATGAAATTAAACGTCCGCAAATTACAACAAACAATGAAACTGACAAGTCCCTCTAAACGTTGAGTTGTTTTGTTATATTTTTGCCAGCTGTAATGGAATCTTGTCTTCATATTGTTAAGAAACCAATTTTTCCTTTGTCTTGTAAAGGCTAAACTAAAGTTTTGCACAAACGTTGTCTTAGTTTCTAGATCGAAGCAATCCAATCTACTACGATTTCTCTGTTGCCATGTCCTTTGAGTCGAG
>c15800.graph_c0
ATTAGTTTGGAGAAGAGTAATAGACAGAGAGATAGAGAGAAAGAGAAGCAGTTCGGAGAAACAATGGCGGTAGAAGACACTCCCAAATCTGTTGTAACGGAAGAAGCTAAGCCTAATTCAATAGAGAATCCGATTGATCGATACCATGAGGAAGGTGATGATGCCGAAGAAGGAGAGATCGCCGGAGGAGAAGGAGACGGAAACGTTGACGAATCGAGCAAATCCGGTGTTCCTGAATCGCATCCTCTGGAACATTCATGGACTTTCTGGTTCGATAATCCTGCTGTGAAATCGAAACAAACCTCTTGGGGAAGTTCCTTGCGACCCGTGTTTACGTTTTCAACTGTTGAGGAATTTTGGAGTTTGTACAACAACATGAAGCATCCGAGCAAGTTAGCTCACGGAGCTGACTTCTACTGTTTCAAACACATCATTGAACCTAAGTGGGAGGATCCTATTTGTGCTAATGGAGGAAAATGGACTATGACTTTCCCTAAGGAGAAGTCTGATAAGAGCTGGCTCTACACTTTGCTTGCATTGATTGGAGAGCAGTTTGATCATGGAGATGAAATATGTGGAGCAGTTGTCAACATTAGAGGAAAGCAAGAAAGGAT
>c15802.graph_c0
CTGGTTTTTTGTATTCTCCTGGCAGATTCCACTGTATAATTATTATTTACCTTAATCCTTGTTACTCACCGTTTAAGGCTTGATTTTCCAAAAAACATTAAAATAAATATTTCATATTAGATTTCCTCAAGACTTCATTTTCTTAATTACTTTCACATTCGCATTTTTGATAAGGTCACAGGTCCTTAGCCTGACTTTTAATGTGACGACTCTGTCAAATGTGTGTTTGATTGTTAAATATTTACTCATGTCTGTATAACAGCTGTAAATTAGCGACATATGATTTATAGACTTATTTTGGAATTTTATTCTCACATTTAAATTATGATAAAAATGTATTAGTCATAATTTTAAAAATGGTTTACACATTTTAACAACAATTATAAAATACATATTTGGGG
>c15820.graph_c0
ATAAAAATTTGAATAAAGAACCTCTATTTTATGAATAATCAACTAAGAAGTATTTATTTAAATTATATATAAACTTATTTCTCATTCTAAAATAGTTTATAAATAACTTTTTATTAGAGTTTTTTGACGGGACCTTAACCGATAATGTATTTCTTTTTCCTACTTTGGCAATCAATACCCATTATTAGTGACACTAACAAGTGTATAATTATTCTGTTTTATATTGTCTTATCTTGTGACAGACAGCTTTACTGTTCAAGATGATAACGCTCGCTCTTATTAAAAACTGTGCAGGGACTTTTTGCGACAACTGAGAATTTTTCTTTTGTGTTATATTTCCAATCAACTTTACTTGTGTACAATAAGTAGGCTTTATTTTATTAAGATTTCACCAACATTACACAAAATAACATCAAATAAAAGTAAAAGATTGACTGCCATGTATGTTGTGGTTTTTATTTTAAGCTTTCACTATGTGAAACTATACTATGTGGTTATTATTGG
>c15834.graph_c0
ATCTTATGAATGTTGGTGGTAGTTGTCTGAAGATATATTTATGTGGATTTTGGCCCTTATAAATTTTCTTTTGGATTTTTTTTGTACATTACAGGTGAAAGTTTTTAGGAATTATGAGTTGCTAAAGATGTGAAATATATCAAATTGTTTTTTTTTTATCATAGCACAACAAAGTGACTGCGCTATGCCTGTGGTAAGGGTAGTACAATTTAAAAATAATGGCAACCACCGAGAGGCAAACTATCTATTGCCGGTTGCCGCTTTCATGTCGGCTTACATAAGTGTCTCTTCACTTTACGTTCTAAGGATTCCATGTCATAGGAAGGAGGGAACAAACGGGCCGGGAGATTGTTTCACATGGCAAAAATATAATGTTGTGAACTTACTAGTTTGTGTGCAGATACAATTTACTGTGAAATTGTAACTCTGAAGCTCAGTGTGCCTGGTTCGGCCGGGGAAAGGGG
>c15835.graph_c0
GGGCATTGCTGGAATAGGTAAACACAAAAGATATTGTGAACGAATGGCAGCCCTATTCTACGAACAAACCTGTGTAGAGTTGATCAGCTGCATTGACATAGTGTTATTGCACATAGTGTTCGACACGAGAGATGACACCAACGGTAGTGGCATCACCGGCGGCAGAAGGGGCGTGAGGGTGGGACTCGACCCGTCCTCATCATCGGACAGCTAGGTTAACACGACCAGCTCGTTAGTCGTATCCCGACGAAATATCAAAATACCATTTCTAATTACTTTTTACAATCCAATATCTAATAACAACAAGTCTTCAGAACCATCATGTTCATTGCAAAAATAAAGTGATAGTTTACAGTGCAACAAGACATTCTAGTGTACGGTACAGCAAAGCAAAGCACTCACGTAAAATGATCCAAATAAAAATACCTTAGAAAATAA
>c15836.graph_c0
ATCAACGAGAAAGGACTCAAGTACTACGAGGATTTAATAGACGAACTACTTGAATATAACATAGAGCCAATGGTCACACTATACCATTTTGACTTGCCCCAGAAACTTCAAGATTTAGGCGGTTGGGCAAACCCGTTGGCCGTCGATTGGTTTCAATCCTACGCAAACGTGGTTTTCGATAGATTTGCGTCCAGAGTCAAATATTGGATCACAATAAACCAACCAAATTCAATATGCATTGAAGGTTACGGAGGTAATGTTATGGCACCAGCTATAGACAGCAGTGGTATTGGTGACTATCTGTGCGTGAAGAATGTTCTTTTGGCTCATGCTAAAGCTTACAGATTGTATGAGAAAGAATATAAGAATAAATATAAAGGGTCCGTGGGCATATCCCTCGCTATCAACTGGGTGGATCCTTACAGTAACACAACGGAGAACAACGAAGCCACG
>c15837.graph_c0
AAAAAATGATATGTGTATAGGAACACAGATTTTTTTAAAGTGATTAACTAGACTATGGTTGGTTAAAATTCGCCCAAAGAGAACTGTAGAATATTTACAGAGACTATCTATGGATACAATTAAAATTTATAAGTACTTTTTTCAATTATCAGATCATAGGTCAGCGCCACTATGTCGGTTCAGATTTGTTTACGATTAGCACTATAGTGTTGATTGATAATTATTCGATCAACTTCCATTATTAGAGATACACATTCCATTGGAATTGTACCGAACAACAAACAAATACATTAATAGTAATCCATTTGGAATGTAAAAAAAAA
>c15838.graph_c0
GTGATACGATAACTGTGGTTGTAGTGTCGTTATTATTCAAGGAAAATAATTACAATGGAATGTAGTAAGTGTTTAACTCCAATTTACGATAACGAAGAAATAACACGTGGTAGTTGCAAAAAACCGTACCATTTTCATTGTGGCAGTATCAGGGAAGTATGCTTCAGGAAAATGACCTCTGTTAAAAAATCTACATGGCGAGGACCCTGTTGCAATAAACTGAACCTGGAAACTAGAGTGATCGATTCGACATCAACTTCGGAGACTGTCTCTTTAAACGAAGTACAAAAACTTCTCCAACAAGGATTCGGCAATATTTTACAACAACAAAATTCTACACTCCAAGACTTTAAAACAGATGTTATGGTGAAAATTAACGAGTCATTATCGTCAC
>c15841.graph_c0
ATTCACAACCGAAAAGTCATCCCGCTCGTGATCGCTTATATTAACATCTCACAGGGGAGCTTACAGCCATGGCACTCCTTTCATCACGTTCTTCTGCCAACTGCACTGGTCGTTCTGTCCGCCGCGCCACGGTCGCCCCTGCTCCCGTCGTCAAGCCTCACTCGTCCGTCGCCATGCGGTTCACCAACAACACCAAACAGGACGCCGCCGTGCCGGCGCCCTGCGACATGCAGTTCGTCCTGGACTCCAAGTTCACCAGGGAGAGCGGCCTACAGCCCCGCGTTGTCTTCCGCAACCTGACCACCCCCCAGCTGTACGAGATGGCTCTGGCCCACGAGCCTGGCACCCATATCACCTCGTCTGGTG
>c15853.graph_c0
CTGCGATATATGATCTTATGGGAAAGATTGTAGAACCTATCGTTGATGATGACGTCGTGAGAGAGAAAGTCGAGAGACTCTTTCAAAAAATGGACTTAAATCGTGACGGTGTGCTGACTTTGGACGAGTTCCTCGATTGCTGTCTCCGCGACGAAGACATCTCGAGATCTATGGGCGTATTCGATAGTAATTTCTGACGCCCTAAAAGTGGCGTATGGCCAGTTTCAACCTGCAACATGATTCGACCGACAACCGCGGTAGAACTTGAATAATTCTACATAGACTATATACATAATATACTCGTATAATTCAAAGATGTTAGCGATTTGATGTTCCATATTTGCCCCAATTAGAATCAAATCTTTATTCTAAAGTAACAAATACCACACGGC
>c15875.graph_c1
GCTTTGGAGATCAACAGGTGCAAGCAATGGAGATAGAGATAGCAACTACAAGGTAATATCAATGGAAGGTATGAATGGAGGAAGGGTTTCAAATGGGAGAAAGTCAAGCGCGGGAATGGTTTCACCAGACAGAGTCTCGAGCAAAGGCGGATTTAGCCCGATGATGGATTTGGTTGGACAATGGAACTCTTCACCGGAATCTGCAAATCATCCTCATGTAAACCGAGGAGGAATGAAAGGTTGCATAGAATGGCCTAGAGGTGCACAGAAGAGTAGTTTGAAGTCAAAACTCATTGAAGCACGAATCGAAAGCCAAAAGGTTCAGTTAAAGCATGTCCTTAAACAGAGGATTTAGGAGC
>c15876.graph_c0
CATGGGTCCAGTATGTCGGATGGTAAAGGAAATATAGGATAAGTAATTTTTTGTCTTAATGAAGCTTCACAAGAAACATGTTTCAAATGGCGGAAAATAAAAGCGTCACAGTTACGCCTCAACTCACTGGAGAAAATTTTAGAACGTGGCTAATCTGTTTAAGCTGTATTTTGAAAGAAAATGAACATTTAATGGTATTATTACATTACTTACTCTATAAAAAGCAACAAATATGAATGATACGTCTCTTAGGCTAGACTTACATTGTAAGAGTAAAATAAACAGAACCGTTTTCAATGCTTGGGAAGCAAAGTAAAACCATCAATATTTCGTGAATATTTCGTTCTAGATATAACATACTAACACACTGTTATTATAGCTATAAACTTCCCAGTGGCATATCATGCACCATTCACCTTACATACCTTCTGAGGTATGTTATTTATTTATTTACAATGCACTCATTTCAGATAATAATTAACTATGTTTACAATTACAATTTATG
>c15878.graph_c0
ATTTGTTTGTTACACTTTTACGCCTTAACTACTGAACCCGTTCAACATGACATGACAGCATCGTGACATTCTCAGGAGTACAGAATAGAACACAAGGGTTATTTTTCTCCAGATACAAGTTATCGAGGGATATGTCAAATCTGCAAAAACGCGGGCGAAGACTAGTAAAAGAATAACAGTTTTCGTGCACATCCTATTAGATTTACAGTTAGAAGACGTAATACGTAAGTATATATTCCGTTACAAATAAATGATGCAAGTTTTACTGCTTTTAAACTAATTCAGATTGTAATTGCAATTTTATTGAAGTATTGAATGAGTACGAACATGGAAGTTATATGAAATTTTAAATGTTTTGACGTAAGGACTGATAATTTAAAACCTAAGGTATAATTAAATGAACTAGTGGG
>c15879.graph_c0
GTCCGATATATCGATACAGTCTATTCTTCAAATTTCTTAAAGACTGCGTTTCCTCTCAAATCTAGGAAATAGCAACCGCCCTGAGGATCGTATCGAATAATCATTTGTACAAATAGTTGACGATTGTCCAATGAGCATGGATTATTATTTTGTCTTCTATTTTACAGTATCAGTACTCTGTAATATCTTTGGATATTCATAATACATACATAGGAAAGCGTGGGTGTTTCGGAAGCGGTGTTGAAACATTTGGGCGAAATGATTCACTAAAGAGCTACTATATTTTATCGATTTTCACGTCACTAATGTTAGTCACAGATGTAAATGTTATTTCATAAGAATGATCTTTCAGAAGTATCTCCGGTAAAGTA
>c15898.graph_c0
GACCTTTCTTCTCTCGAACTCAAATTCCATCTTCGTGATGGGTTGACATGAAGGCTCCCTTTCCACTTTTGCCAATCCCTTAAAATATGGATCAGCAAGTGCCTCTTCAGCAGTTGGCCGGTCTTTTGGATCAAAAGCAAGAAGCCTCTCCAACAACTTCAGAGACAAAGGATCTGCATTTGGGAATTTCTGTGCAAACGGAATGGGTGGCTTTTTCCTCATGCTTGTTAAGTACCTCCTTGCCTTCTCATTCCTCACCCGTGAGATGGTGTCCAGGGAAGGTGTCCCTAGCAGATCAGTCATAAGATCCAGCTGGTGAACCACATTCTTTCCAGGGAAAAGTGGTTTACCCATCA
>c15900.graph_c0
GGCGTTATGGACGGACGAGCCGCTTTCGTGCGAAGAGCTTGATCGATTGGTTTTTCTCAAGGCAGCGTTATCGGAGACTTTGAGGCTTTATCCTTCGGTGCCGGAGGATTCAAAACGCGCCGTGAAAGACGATGTGTTACCGGACGGGACATTTGTGCCGGCGGGATCTTCGATTACTTATTCGATTTACTCTGCGGGGAGGATGAAATCGACTTGGGGAGAGGATTGTTTGGAATTCAAACCAGAGAGATGGATTTCGCAATCGGACGGTGGGAGATTCATCAATCATGATCCGTTTAAATTCGTTGCGTTCAATGCTGGCCCTAGGATCTGTCTGGGTAAGGATCTGGCGTATCTACAAATGAAATCAATTGCATCGGCGGTTTTGCTCCGCCACCGGTTGACGGTGGTGACGGGGCATAAGGCGGA
>c15903.graph_c1
AAGAAGATTCCCTCGCGAAAAAAAAAGTATCTCTGTAGCATATACTAAATATACCTCAAAAGTACGTCGATTCTTAGATTAGTTAATATACTGTTGTTCCTGAGGATAGAATTGCAATACCTTGTGTAAGAGTATATATCGACAACCACACCCATCGGACTAAAACAAGACAGCGCGAGTATTGCAGCATTACGGGAGAAATAGATGAGGTTTCCGTAATCAAACCTATCAATTCCCGTAGCACATTCCAGCATCACTGGTTCATGGAAGTATGTAACAGATGATCTTGGTATACGAAGCTATGTACTTATTAATGGACCCTTTTTTACTTTTAGGGTACGGCCTTGCTGCTGGTAAT
>c15913.graph_c0
ATCGCTACAACCAAGAACAAGAGGGTAATTGTTGATATCTTCAATGGTAAGCCCTAACTTGTGAAGAAACTCGACACGCTCTTTCATCACATCAGCTGTTACAGGGAGTTCAAGGCCATCAAGCTCATCAGGAACAATCCCAATCCCACGCAAGAACTCATAAACCTTAGCACGATTAGCAGCTTTCTCCTTATTCATATCTAACAAACTAGGACGACTATACAAAGACTTAGAATCTCTTCCCTTATCCTTATCTCTATCCCTATCCCTTCCCGAAGAAGAAGAAGAACGAGAAGACCTTTCTCTTCTCGGTGAATCCAAAGAACGTGAAGAAAA
>c15915.graph_c0
GGAGAAGTCGGTAATATACTTTCGGACGTTACTGCCTAATATTTAATTCCCAGAAACCTGCTTTCTTCAAATTATAGTGAGACTAAATGGGTTAGTTCACCGCACAAGTTCAGTGTCGATAGGAAATGTAATATTTCAAGTTTAATTTACAAACTTCGGATGTGATTAATATAATTGTTTCTAAATAAATGTGCAGTGATTTCGTAAAATCATTTTAAATTCAGCTAAATACCATTTTTAAATATAATTGTATATGCAAGATGTTCTTACATGTTAGTTAAGGAAATGGATAGAATATTTTTAGAAAAGTGTAGGACTAGATATAACTGATGTTTCCATT
>c15921.graph_c0
GACTGGTCTTGGAATGGCTCGATATAAATGTTTCTATGATTGGAGTGGTGTACTTCGTATCGCTAAATTATATCTCCACGATATGGTATAGCAGTCAGTAGGATATAGGACACAGGCATTATTTTTAACCGACTTCAAGAAAGAAGGTTCTATATTCGACTCGTAAGTAATTATATATGTTTGTATGTCCGCCATTTTCTCAGGAAGTACCGATCTGATTTGGTTGAGGTTTTCATTGTTGGATGCTTATTTTAGTACATAAAACATTAGGGTCTGATAAAGATCTTCGGAGATATGTAGTAAAACTCTGCAATAACTAACATCAAATACATAACATAACATTACGCCTGTATGTGTTTTTTAAAAGGAAAAGAA
>c15923.graph_c1
CGTAGCAAAGTTTAATGTTTTAATATGGAATACACACAGCTTAAAGGATATGGTTCTTGTGATGTTTTTTAGTACATTAAATTAATAATTTTAACTAATATTACTATATCTGTATAATTTATCTTCTATATGAAACTAATTATAGAGGTCTGTTGTTGTACGCGCTCTTTACGCAAAAACTAATGGATCGATTTATACATATCGGACTAGATAGATCAAGTCACTTATTAATTACTTAATTTAATGATTTAATTTACTCGTAAGAACCTACGATTTTTATTCACACTGCGCGTTTTGTGATTTGCGTCTTCCCGTGGAGAATTGGGGCAAGCGATATTTGGTGCTTATGGTTTTG
>c15932.graph_c0
GAGCCGATACGTTTCAACAAAACTAGCTAAACTCAATTTTAATCGTTCATATAACAAACATGCTTAATATATTTAAGGTCTCCAGTTCTTATAAAAGGTGTGAATACTGAGAGGGGCGAGTGGAAAAGGAAAACATCTTGTACCGACCCTTCTTAGGTGGGATGAGGTTAAGGAGACGAATAGTACACAGATATTAGCAACCGCCAATGATTTGGTCTGAGTTTGTATCTACTATCTAACGGTTTATCAGATGATAGGATTTTTGGTAACTTACTTGGTATATATCGTTTTATTTTGGACAATTCAGGCATTATC
>c15936.graph_c0
GTGCGAATAACATTAAAATGGGACCTCTTGCAAAATGCACTTCCAATAAAAAAAATCCAGGTCGGTTTGAAAAACGTAATTGACAACCTTTTTAAAGTCGATAAATAAAAAAAGAACACAGTCGGTTAATATTTATTGTCTGTGGACTATTTTTATTGTTGTTAAGAATAAGTAATCAGCGCATAATCTGCTAACATTTATTATATATTTATATTCACTATTAAATACTGTAATAATTTTAATGTTAAAAAAATAGTTCCTTTGTAAGAATTTTCCGGGTAGTTTTTATGATATCGCAGAATTCATGTTTCGTGTTATTATTATCTGTAACCCAATTCATTTATCCACCATTTTCAAGCCACATTACGTAAAAATACCACCAATGTTTACATAATATGGAGTCAAATAACGCTACTTTTTGAATAAAAATAAAACCTACTACATAACAGTCTAGGATCCTGCCAAAATCTTAAT
>c1594.graph_c0
TCTGCAACAGCTGACTTCTTTTCAAGTTCCCACATTAGGACATTGATCAGATGTGAATTTTTAATTACAATCGGCACTTCTTCAAACATGTACTCAAAGGTGATATTTGCTTTTTTCAATGCTTCAGGGGAAAAATCCTTTTCTTTACAAACTTCCATCAGTTTAGGAGTCAGTCTGTATGCCTTTAGTGAGAGAGATCCTTGGGCAGTTTTTATGGGATCATAAATGAGAACGACAGATTCTTCAATGGCATGCTGGTAACTAAACTGAGAGTCCAGGAGTGCCCGGGTAACGAATGAGCCATAGTATGTGGACTGATACCAGCCCACGTGAAGATGATCAATGTTTACATGGCGAAGGCTCCGCATCATTTCCATCTGATATTGGACTTCATCAAAGTCAGCATCATCCTCTGTGTGCTGAGGGAAAGGAAAGCAGTTG
>c15953.graph_c0
AAATAGTAAACTTCGAGGACCGTTCCGGCATCACGCGACGCAGTTATCATCATTATTCCCCGCATAATAGGGCACTATGATCAATTTTAGTCATTTTTATGTCATGTGGGAACAAATCCAAAAAAGTGACAATATAAAATTCGACTGTACATTTTTCAAAATAGCCGGTTAACAACAAACAATAGTACTTTACGAAATTTTCTTCGTGTTTAGTAGAATTGTCAGCAACTGGATCTAAAATGTTGTCTGTTACACTAATTAAATACATTATCATATATATATGTATATACGTATGTATTTGTCCAAATTTATATTAAGCGAGTAAACAACCCCATTAAATTTAAAATGAATGCAAACTGGCATTTCGTTAGCAATAAATTTAACACCGCCTTGTTAGTGCCTTGTTATCTTTATTCGGACATACATAGGTATTCGATCATTTAGAAATCTTATAACTCTATCGAAGAAGTTTTTCCCAATAACTAACATTTAAATGTACATTCCATCTCCA
>c15960.graph_c0
GATCAGATCACAAAAATTTTCCTTATACTTTTTTTGCTAAAATTTACCATTTCTGAGAATAAGCTATTCTCATATTTTTTGGGCTAATATGGGGGTGGCGCGACCGGGTAACCTATACCACAACGCTAGCGTACGCATAATGAAGGTTTATAGAACGTCACGGTTGTCGCCATTTGTTTGTTGATAGTTTGCTTCAGTCTTTATTTCGTTGCCTTATCTCACCTTACCTTACCTTACCTCGTTACTTAATTACAGGTTAATATGATCTAATGTATGCGACCTAATGCAGTAGTGGAGTCGGTGGAATATCAATCCAATGTCGGCAATTTCGCACCCCGAC
>c15968.graph_c0
GTCCGATATATTAGTAAATAAATTATTCACATTTGTTATACAATAATTTCGCATCTAAATCTTATAAATTAATCATAGAAGTGCCTAAGTAATCTAATCTAAGAATCTGGACTCTAAAGATTATTTCTCTTGATACAGGTCGCCCTCGCTCTGATTGGCTGCGCTGTCGCCGAGCCACCAGTCGGATACAGCTATTCCGCTCCGTCTTCTCTCTACGTCGTCAGTGGAGGCCACGGGTCTGCCCTCAGCAGCGGAGGCCATTACAGCTCCGTGCCTGTCGGACACCAGACCTCCGAAGGCTACCACATCGACCCCCATCTATTGGAGAAGGTCAAGCATATCGTCCTTAAAGATGAAATCCACAACCAAGCCTACGAATCTGCCTCGTCCTCCCACGGTCACGGAATCTCCAGCCACTACGGTGTCCCGTCG
>c15970.graph_c0
GGGCCTGCCTCGGGATCTTCGACCAGGAAGGGACAGTTATAGTACTAAGTTCCCTACGTAGGCTAGTGACTTTCTATTTATATAACAATACCATCGCATCCTATTTTCCTGTATCTTATCAGCAATATCGCGCACTCTTAGGATGCCTTGCACGTACTCGTTGCGGATAACATGGAGCCGAGTTATACCATACATCAACCGTAACATTATATTCCAGCATCTTGAAAAGTATGAATGTTCTTCTTATTTCCAGCCTATGTTTCACTGTTGCCGTGTGTGTTGTTAAAACCAGTCCCCGTTTAGGGTGTTTACCATCTTAGACCTTAGATCGTGTTCAAATGCCAAAACCAATAAAGTATAATAAAA
>c15973.graph_c0
ATAAAACGTTAAATGTAATTCTATTCTATAATATATCATTCAGTTTATTGACTGTATTCGCATACGACGAGCTCGGAATCCACGCAGCGGCCTGTGACAGCATCAAAAGAGAGGCCGGCGTCACAGGACAGAAGACGAGCGCGACCATGTTGGCAAGTGAAGAAGTAGTAGCAGCTGCCTTCGTACTTGTAGTTCTGAACGATGTCAAGAGGCTTGCCGTTTAAGTCGAGAGGCGCGGCCGGGCACTTGAAACCAAGGAACTCGTCAGTGTTGCAAGAGGGGACGAGGTCGGGCCAGTCGCAGCGGCTAATGCTAGGATTGAATGCTAGGCCGACAGGACATTCCATATCGACAGCATTCCCCGCGACGCACATACGGTAAGAACTGCACTGAGCAGCATTGTTTTTAGGATGCGGGAAGAAACCATACTG
>c15980.graph_c0
TAATTTAAAAATTTTCTTATTAATACATATGCACACTTAAACAGTTAAAATCTTTTATATTCCTTTTACTAAAAAATAAACATTTGTCTATGTATACCAGGTGATTATGATTGTTTCAGACTTTCTCCCCGCATTCATGTGTAGTTGTTGTGTGTAATTTAAATTTTGTCCGTCTTATTCTTATTATATCTTCTCTTATTTATTATTTATTCCTATTTTCAGTTCCTTTCCAGGTGAGATCATTAGTTACATTTTTAAAATTTACTTAACTACTTATTTCTAATCCCAGCCACTTTTGCAATCTCCGCAAAAAATTCTAATGTGGCTACGGAATTTTCCAGTGTAAGGAATGCGGGGAGATTAGTG
>c15985.graph_c0
GTGTACTTTGTTTTAAAACTCTACATTTACCGATTTCAAAATACTACACTACCTAACAAGCAGTAATTCACGATCTCATATCGAGGAAGCTATATTTCATTACCTACGCTATCTTCGTGAAGTTTCGCTGCAATGCCTTACGGTAAAATTACGCATAGTCTTGGTGATTCGCGTTCATCGGATATCCAACGGAACAAATACGATATGTTGCTGAAATACGATTTGTCTGTTAATAACCCGTTAGAATATCGACTGTCGCACACAAGTCAATCCCTTTAGAATGTCAAGAGTGAATGTAGAATGAATAGAATGTAGATTTAGAATGTCTCATATACCAGGTTTTGAATCCAGTTCATACATAGCACAGTAATCCTAATAAATTTTTATTCCTTTAGTAAGCTGTAAAATGCACTCATCTATA
>c15987.graph_c0
GTAGTGGTCACTTAGCATCATCACTCGGGCGGTATATTTGTTTGTCATTGCATAATAAAACACTTTCAGTTTTTCTTTTATCTACCTGATTAGGATCGACATAAATATGTTTAGGTCTAAAAGGTAAGATTGACAATGAAAGATAGTGACCTATTAGTGACAAGACCGATGCCCTATTTGTAGTTGGTTTCCAAAATCTGCATTCCATAAGAAATTATTGCACCAAATCACCGAAACTGTCTATGTAGTCCGGCATTTTCAGTGTCAAATATTTGCCAGAAAAAAGGAATTAAATTACTTACGTCCGATTTCTGCGCATAA
>c15990.graph_c0
ATTGGAATTATGGTTCTCTACTATTTCTTGTGTTCTATTCCTTTGGCAGTTACAGTTATCGCAATCCTTAACATAACAGGTCTTTTCCCAATTATGAACACATATTTCTTAAGTAATATTATCAATCCATTTGCAGGTGCTACTATAGGAGGATTTTTAGGTCTTGGATTAGCTATAGTACTTACTCTCTTCTTCCCAGATTTCCTTATGAAAGTACACAATTTGTTTACTGTTTATCTTTACACGGCTCTCTTAGTATCTCTCTTAGGATTAACATCTCTCGTACCATTAAAATTAAGTCCAGAAGCCAAACCAAATGCACTGAATATGGTAACAGCCATTGT
>c15991.graph_c0
AAACTTAGTAAAGAAAATGACGAAGAAATACAGATAGTAATATTCGTCGAACTTTGAACATTCAGTAACCATTAATACACAATTTTATATAACCAGTTGTAATGTTTCTAGTAAAAAAAAATATTTAGTTTATTACCTTCTAATTTTATCTAGAAAACGCTATCCTATATTTTTTAAACTTTATATTTTTGAACACAAATAATATTTTGTACTTAAAATGACATACCAAGAGAAAAAGGCGATGAAGAGCTGTGATGGACACCCCAGATTTAATAACTGTATAGTAGAAAGATATTTTATTCAGACATTTTTATTAAATAAGACAAATAAAATGAATTGTACTGGGTGGGCATTGTTATGTTTCTATATATCAATGTGGATGGTTATATTTTACGATCTGTCGCATTTTCATTTCCGTTTATA
>c15993.graph_c0
TATATTTATATTCAAATGGTATCAGGTTTCATTCAACAAAATAACAAACAACTGTGCAAGTCATGGCACAAATAGGAAAAGTATAGATTTTTCAAAAGCAAAGACAAATTATTTTATAGTTTCAATTCATAAAAAAAAAAAGATTAATTATTTTCTGGTTTTTAGGCCTGTGTGTTGACAAGTTTAATCAGCTTATTGTCATCTAATTAACAGGCAGCACCACTGTAGAGACCTGAAAAGAAGGGTATTTTTGTGTATTTTTTTTATAGATGAAAAGATCACAAAGCAATACAACTTGGGGTGATTATTGAACATATATTTAGGTATATTAGAGTGTTTTTTATAAGGATTTATATAGAAACATCAACACTATACCAGTTATATTGAGGCATATTGAATGCAAGGTGCTTTTAGGCATGCAGTTTTTTTTTAAACATACTTTATTGTAGCTAGATAAAAACATAATGAATCTTTGATATATCAATATCTGCAAAATTGGTCAGTGCTTGTTTAAAATTGCTCAAATTTCAGAAAAAACGATGACTCACAGTTAGTTAAAATAGTTAATATAAACTTATGGAAAGAATCCAATGGACAGATCGGAA
>c16001.graph_c0
AACACTATACTGAAGTTATTTATTTTAAAAGGCATATTTATTGCTAAAGTAAGATGTATTTACTAGTTCAGGGTTTTTGTTTAAATTATTTTAGAAATATTCATAAATATAAAACTCATAAATTTAAAACATAGCACGCCTGCTGCATTCATAGTACATTCACCAACAAAAATCATCTTACTTTAGGCGCTTTCATCTTTGCTATGCAAAGCTGCTACTGTACAAGGGCCTAACAGTTTTCTAATAATACCTTGACTTTTTGTTAATTTTCTAACACCTCCATTCATCGTTGTTCTATATAGTACTGTATCGATGTCTAACTCATAAGGACGTCATTGGTAACGTAATACGCA
>c16002.graph_c0
GTTTCTTTGACATCTAGCATTTCTTTGCGTAATATTTTTTTATACATATAACACAAGATGGCGTTTGTCATAGTTTTGAGGCGTTTTATGAAAGGATCAGGACATGATATGCTTCCATTAACGCTGACACGACATTGAGATCACGTTTGCAAGTTAGCCGAGTTTTAACGAGGCGCTGTCGAAGCGCTTATACCGTATCTAGAGCATTTTACTTATAATATCAGTGCGGTGTATAAATCTAGATTTTAAGGAGAATAACTGATGTTATTATTTTGTTATTCTGGCAGGTTCCATAATGGAAGCAGCACA
>c16005.graph_c0
GGTCGTTATTGTGCACTTTGCCTAACATGTCTTCGTCACATCTATTAAATATGACGTGTCATTAATAACATAAAAAAGCGCGTGCAACCTCAGTATACATGATAGAAGTGAAACTTTTAATCAATAATATACCTTGTTTTTTTTTTTAATACTGTGATCGTCTCTGTTATTTGATTTCGCGTGCGCTCGTCTTGTTTTAATGGGTACATCTATCTCTCTTAATTTATTGTATAGGTTTTCTCTTTCTCTCTCGCCCCAAGTAATTATTTCCGTCACTTTTGTGCGAAATACGTTACGTTGCATAATTTCGTGTTATTTGTTCCTCTCGCA
>c16012.graph_c0
AGTTTAGTCACTTTTGTGTCCAAGTAGGAAGATAGATTTAGATCAAGCTATAATTTAATATGTGACATCCTAAGCTTAATAGTTCTTATAGAATGGATTCATTTTGAATGTAGCCAGTCAAACTACACTGTAAAAAATATCTGTAAATGAGCTTTTTTCTGTATTTTCCCCTGTTTTTTATGCTTTTAAATTGAATTATGGGACTTTGATTATTCTTCCGTCAACTTTTAACCTTGAAAAGTTTGAGTCTGGGTTGGTGGTTGTAGTTCTCAGGGAAAGGCTTGTAATAAACTGCCAGTACATTTTCTGTTATTTTAAAGATGTATTT
>c16017.graph_c0
AACCTGTGTTACGTGTATTTTTACCATTGCATTTGGCATAGGGTCGATTCACCCATATTTATAAAAACATCGGTAGCTGCCCTCGGGATATAACATGGCCCAAGAAAGGACATACATCTGTTAAAATTCTACTTCAACTAACAATTTTCCTGCCATCATGTAATTAAACCGTTTTTACGAACAAATTTAGACTTCTTCAAGCTATTAAATTCTGTCACTGTAGTGACAAAAATAAACTTCTGGAACAATCAGTCGCATACAAAATGTATATTTTTTACCCTGTAGCATCTATAACGTAGTTATAAATTTATGTAGTACTGAAT
>c16018.graph_c0
GTTTGCTATGCTTTCGCGTTTTAAACTCTTCAATCGATAATTATCACATTTTTCATACACCGTCCCAATACAGTAAAGGACATAGAGGTATCTTATTCCTTCACCCAGAAAAAAAATGTAATAGTCCCGAGGAATAGATCGATTGTACATTAAGGCCAATGAAGCCGCAGTCAACACCTAATGATAGCAAATAGACAAACAATAAAAACATAACAAATCGATTACAATGAATATGTATGTATAGTAAGAAGCCAAACAAAAAAAAATAGATAAGAGATTACTGATTATAATAAAGAATAGCATATACAATCG
>c16021.graph_c0
GCTTGAACACAAGTGCGATGCTCAATGCCATTGTACAAATTGAATGTATTGATGATCTCCTGCGGGCTCGGCTCGTCCCGTCGCGTCGCAAAGACATTTGGAATGCCTCACCAATGTTTCTATATTTTGTTGAAATTGTAGATATTACACGTGTATTATAGCTATGTACAAGTATATATATATACATACGTTTGTTGTAAAGATGATATATTATAGGGTAGCCGGGGGCGCACCGACCGTCGGCCCGCGCCCTCTCACCAGTTATATATTTTTGCACTGTCTTTGCATGTAGTAAGGTGCCCGAGTCTAGCGAGCGCCGACCGTGCTCCTCTCACCCTCCGCGCGTACCACTACGAGCCACTACACTAAACCCTCCTGTCACATTACACGAGTAAAATGGATTCGCGGAAGGCGGGAGACCAAG
>c1603.graph_c0
GAGAGTTCAGTTCCTCTCTCCTCCATTGTCTTCTCAAGTTCTGAGATTCTAGCAACCATTTCTCTGTTTTGCGCTTCCAACTGCTCAACTACGGTGGTCTTGCTTGCAATCTCTGTCTCAAGATCTATTATACGGGCACGAACTGACTCTAGTTCCAGCTCCAGTGTCGCTACTGTTGCTTCTAGTTCTTTTATTTGCACCTGTGATTTGCTGTCCTTCTCTGTCAGAAGGAATAGTTTGCTTTCTTTCTCAGCGAGCTGCTCTTTCAGTTTGCTCGAATCAGCTGTGAGTTCCTGTACCATGATCTGTGTCCGTTCAAGCTCATCTGAAGTTTCTGAGATTTTCGTGGACATAGTTCTGCTTTCTTCTTCTGCAGCCTTCAGACTTTCGCTCAATTCCA
>c16031.graph_c1
GATCCTACTTGTCCTTGATGGAAACACTGGTTTGAACATGCTTCCACAAGCTAGAGAATTCAACGAGGTTGTTGGTATCACCGGTTTGATATTGACGAAACTAGATGGCTCTGCTAGAGGAGGCTGTGTGGTCAGTGTGGTTGAGGAATTGGGCATTCCCGTAAAGTTTATCGGTGTAGGAGAAGCTGTAGAAGATCTCCAACCTTTTGATCCGGAGGCTTTTGTGAATGCTATATTCTCTTAAGCCATAAAACCTCGTCTTCTTCAAAAAGCTATCATCTTCAACGCAGGCCAGAGCCAAGTGGAAAATTCACAGTGAATTCGCCG
>c16039.graph_c0
TTTAATATAAAATGTTTTGATATAAAAAATTACAATTGAACTTATATGAACTCGTACAACTATAAGGTGTCTACAGTTCGAAGTGTAAGACATTAGTGCCGTAAAACGAAACCTACTACCTAATGTACGACCTAACATAAGAGATGTGCCTACTGCTCGGTCTAAACGAATAGTATCTTCAAATCAGGATTCAAAATATGAGATGGGACTCACGATCTCCAATTCCTCGTATTCTCGCCTCATGCTGCAGGTGGCTGATGTATCGCAATGGTTATAAGTAAACGATGGATTATTGTAAAAATACAATATTAGTGGTTAGTGTGGTCACCCTAAGGGTACAGTCGTCACCGCAATAGTATTAGATGTCAAACG
>c16042.graph_c0
AGTTAAAAGTAATAAATTATTGCAAGAAATCGATGACAGCTTCGATATAAATGACATCAGCATTGCTGCGAAAATTAAACGATTGAAAATTGAAGAATCACATCTACTAAAAACTTTGAACTCTACAATTTACACTAATGTATATGACGGTAATGTCAGAGATCATCAGATTTCTGATTATCATAAGCTTATTTCTCAGTTGAAAGAGCTTTACGAAAATATTAATATAATATTTGGAGATATTAAAGGAAGTACATCGTCTCAAGAAACGATACGATTTCTTGATATCGGTGAAATGGAAGGTAATATCCGTGGATTGGAGGAAAGGATAAAATATCTAAAAAAATATATAGAGTTACAAATGACGTCTTTGAAGTTCGATGAAAAACAGTTGACCGAGGAATTGAATCAAACTCCATCCGAAGTTTGGATTAAAGCTGATTACAAATTACAAG
>c16043.graph_c0
GACAAAGTAAGAACTTAATTATCACGCCAGTGAATAATGTATTAACGATTTAACCTAAACAGAAAAATATTTTAATATTATTTCTTTAAGTAAATGTACTAAAGAATATTTCGTTTCAATACGTTACATCTGATATAAATTAAAGAATTAAAAACAAATCTTAATCCGAATGGAACTGAGTTTTTATTTCATTACCTACATTTATACTTAAGTAGTTTTAAAAACGGATCCTTTGAGAACAAGATATTTAAACAATCGAATTGCTAACTTACTTTTTTCGCATATTTTTTATTTCTTAATGTATGATTTATTGAATTTTATTTAACTTTACGTAGCCCCCTTAGATGCATAAACCTCTAGGCCCCGGCCTCGTATGTTTTCTATACAAAGGATTTTCTACTATAGATCAAAACAACGACAGTAATTATATAAGAATTAAATTTTTTGTATGTTCATAGCTGTACATGGAAAATTATAACGCAATTCCCTAAC
>c16057.graph_c0
GCCCTCAATATTGTTCCAATTTTTAGGTAATGTATGTATGCCATTTCCAACTATCAGTATTTTTCAAGTTATGGTTGTCCCTATTAACATACTATACAGATCTCGAATATACTTTGGGACTGACTATATCGTAGAACCTTACACTATTACTTGAAACATTTATACTTATTCATTATTGAATATGGGAGGTTTAAATTATCATTAATCTAATGTTAAAATTATACCCAGTCGTTTACAAAATCTAACTTGTCTGAGTTTTAACAAACATATGTTAAATTATTAATAATTCAACAGAGTTATGATACTAAATTATTACAACTTGTCATCAGTGATTTCTGAAGGTCAATAATATAGGCTACTCGACCTGCCTGATTTTGTAATATATGTTAAATTATTAAAATTTAATGAAAATGTAGGCACAAATTTT
>c16064.graph_c0
GTATAAGGTATAATAATATAATTTAGGTGATCGGTTCAACTAAAATACAGCTGATCGTGAAAGGTGATTATAATTTACAAAAGACTGTTGCTTTAAAATTTTTCGCATCGTCTGATTGCCTCGGTTTTTTTATACATCACGCTCCAGGATATTGAGGCCGTTTTAAATCGATGAGGTAGAACAAATCCTGGGGGGAGGGGGTAATACGTGTTTATTTACAACTTAATTTGACTCGGAACAAAGTAAGAGTTAATACTGGGCGATGTATTTTGTTCTATCATTGAAGTAAAACTTATTTAAACACGCTTGACTTGGGG
>c16066.graph_c0
TTCAATAAAGAACGATTAACACGATTTGATCCTTCAACACCTATGCTATCTTTACTTCTGCTGCTGGAACTAGACACAGACTGAACTGGAGATGAAGCTGGGCTTGGAGAAAAGAAATGTGCGAGCTGATTAGCCATAGGGCTTCCATCCTCCTTCGCCTGAAAGTACTTTGTTCGTGTTTCCAACAACGCACTTTCCATGCGCTCAACTCCTGCAACTCCACTCAGGTGTCGTACTTTCTCTGTTAGGAGTTCTTGATCTTGTGTTACCTGCATTTGAATTGCTTTCTTATCATGAGTGAGCATAGTGTCAACCCCTTCTGGAGTTAGCTTGCATTTTTGAATCATAGAAAGCTCAAGCTGACAAGCTGCTCTAACCAGG
>c16071.graph_c0
TGAACTTAAGAGTCTTGTGCTTGATAAAAAGCCCACTAATTGAACGTAAAGTTTAGGAATCAACAAATTCTTTCTTAAAGACAGTTCTAAAAGGAGATAAAACACTTTAACGAATGTATAAAGTCTTAAATAGTACGGTAATAGGCCCTGTTTTTTTGACATTTAGGGGATTATTAATATCAAGAAGTTGTTTTGGAGATTAATTGGAAGTCAAACGCCAATTAATGTTTTAATCCGCATAAGTAGTTTTTAAATTATTAATAGACAGCCCATTTGTCAATTGCTTTTTGAATTAAAAATAAATTACAAATTTTTAATAAATCAAAACAAATAAACAAA
>c16086.graph_c0
TTCTGCACGGTAAGAAAACATCGCCGTACGCGTAACGCTTATAATAAAAATCTTAGTCCCTTTTTTAGATAACGATCAAGTGTCTAAGTAGTATAACAAAAAAAAGATCGAATTTCGTTCGAAATATCTGGATGTATTTCCGTGATGCCTGCATAATTATATACCTATATCATTTTATTCCTATAGACTAGGACAGGCCTATTTTTGTCACTTCCCTTTTAAGAGGGGCACGCTAATTTTCGAAAGTTATAAATCCATTTTTTTTTATTTCAAAAAGTGCAAAAATGTATACCTTGTTATTTTGGATACTTGCGGCATATAACAGTAAGATACTGTTCTAAAAAATTCAGAAAAATCGCATTTTGTCACTTCCCTTTTAGGAG
>c16087.graph_c0
GCTGCACTTTTCTCAGATTTCTTTCTACTCGGAGGAGGAAGAGAGACATCTCCTAGTCCGTTTTTACCATGCACAAAATCAGCAACACGCGGAATTCCACCCTTTAAAGGTTCGGAACTTCCTTCTGCAACGGGAACATCAGGGAAGCCAGCAATCTCACACAAGAGTAAAGCGTTGCGAGTAGCATCTTGTGTAGAAACATTACCAAACACAGTAGTTAATCCTAATATCTCCAGCTCCGGTGTTTGAAACGCCATCAATATCGCCATGCTATCATCAATTCCTGGGTCTGTATCGATAATGAGC
>c16099.graph_c0
ATGCGTGTTAGTAGATGCCGCGTTTACCAGCTACGTTATCTGTTCAAAGCTTTCATTACGATCATTTAAAATATAATTTATCATAAATTAAGCAGTAATATGATAATTATGATAATACGTTCAATAAGTCTGTATTATCTAGTATACCCTTTTATAATAGAAATATATTCAACTGTAAAGCTTACGTAACTAATCAGGTTAAGTTATCTGGAAGGAGAAAGAGGTGATGTTATTATTATTACTTACAATTTATAGTCAAGTTTTTTAAGGTCAAGGCACGTCTTAGTTTGAAATTAATATTATAACATTAAAGGAGCAATTCTTCAATTCTAAATTTATATCGACTATCTCTGA
>c16103.graph_c0
ACCCACCTCAATTCAATTGTACGTGTGACTCGTTTGTACACTGAGCTCACATCCAAGCACATCTCTGATCGGATCTAGCTTTTAAATTCAAAAGGACAATCAAACACATTTTATATCTATGACTGTTTAAAAACATTCAGTAAATTATATTTCAGTATTCTTAATTATATTTACCATCTTGTTTTGTATACCATAGTTTAATTTTAGTTTTTATAGATGAATTAATTTTGTACTCTCTCATTTATTCTTGTTCCTTTTCAAATGTTTATCAATATTTAATGTTGCAACATTTTATTTCTCAATATTATTAATAG
>c16112.graph_c0
GTTATTAATGCTTTGAGATCAATCCTTTGAAATCTATTCGCCTGGTACAACGAATACTTAAATGTATGCAGAACGAATAATTGAAGAAGACTATCGAAAGTTCTAGAATCCATCGACAGTGGACGCTGTGATGCAGTCCTGCAATCCTTGGGGCAATTGAATTATATTGGTATACCTTGAAGCGTTGCAAATCAAGTGACGAGTTTATCTTCACGTATGTCGTATAAACACTTTACCAGCGTGAATATTCGATATAAGTACACCAAGAGATACTGGAACACGGTATGCCGGTGTTACTGTTAAGTCGATTGTGC
>c16123.graph_c0
GATATGGCGGATATGTGGGCAAGATTGGCTCAGGATCCTAATGTGGCTACTGCTCTTGGATTGGTATTCTTTTATATATTTTACCGTGTGGTGGTTCTCAACTATAGGAAGCAAAAGAAGGATTATGAAGACAGGTTGAAGATTGAGAAGGCGGAAGCAGATGAGAGGAAGAAAATGAGGGAGTTGGAAAGGGAGATGGAGGGAATTGAGGAAGAGGATGAGGAGGTTGAGGAAGGTACAGGTGAGAAAAATCCTTACTTACAGATGGCGATGCAGTTCATGAAGTCAGGTGCACGTGTGAGACGAGCATCAAATAAGAGGTTACCTGAGTATCTTGAGAGAGGTGTGGATG
>c16126.graph_c0
TACATTAGCTTCGGCACCGTCATGGAACCTCCTCCTGAAGAGCTTGTGGCGATAGCACAAGGGTTGGAATCAAGCAAAGTGCCGTTTGTTTGGTCGCTGAAGGAGAAGAACATGGTTCATCTACCAAAAGGGTTTTTGGATCGGACAAGAGAGCAAGGGATAGTGGTTCCTTGGGCTCCACAAGTGGAACTGCTGAAACACGAGGCAATGGGTGTGAATGTGACACATTGTGGATGGAACTCAGTGTTGGAGAGTGTGTCGGCAGGTGTACCGATGATCGGCAGACCGATTTTGGCGGATAATAGGCTCAACGGAAGAGCAGTGGAGGTTGTGTGGAAGGTTGGAGTGATGATGGATAATGGAGTCTTCACGAAAGAAGGATTTGAGAAGTGTTTGAATGATGTTTTTGTTCATGATGATGGTAAGACGATGAAGGCTAATGCCAAGAAGCTTAA
>c16126.graph_c1
GCAAGCAACAATCAACTGGAACCAGCAACTTAACTCTGTGGTAGAAGAAGGTTTGGAAGAGAGTGAAAACGGAAAAGAAGAAAAGACATCTCATTTGGTAGTTGTGACCGATGTTTGCCTTCCGTTACTCTCATCAGGAGAATCTTCTCTATCCGCACGCGTTCTCATAAACTACGAGCTTCCTACAAAGAAGGAAACATATACAAGGCGTATAACAACTTGCTTAGCTTCAGGTGGAATAGTCATAAACATGGTTGTTGGAGGTGAAGTAACGACTCTCAAAAGCCTCGAAGAAAGCAGTGGCATACTCATCGCTGAGATGCCAATCAATATTTCTGAAATCTTATAACAACACATGGATCTCCGATCTGAAGAAT
>c16128.graph_c0
AAGCAATTACGGTAATAACTCCCAAACAAATGTTCGTGTCTACTAAACTTGTCCTTGTACCGGTTGAGTTGGAAGTCATCACTAGGTCTGCAACGATATATCGATTAATCGATAATCACGATAAAAAAATCGATTTTTATATCGATAAGTTAACACTAAAGATCGATACTATTGCTTTAGGGAAAACATTTTAAATCTTTAACCCAGTTTGTTTTAAAGCGTTAGAGAATAAAAACGAATGTATTTGGGCACCGCGCCATTCGAACAGTTTCGAATCCTGCCGTGAACCGCTGTTATGTGATGATATCATAGCATGGTGTTATTGCGTTTTGTGATATCCAGAACTACAATATCTCGAGTTGAAAATTTGCCTCGCAGTAACCTATTACTGTGTGTGCTGACATATGCACATGAGACCCAATCTCCGTTTAG
>c16136.graph_c0
GCCGTATAAACGATGAGAAGCAGAGTAGGATCCACTTTAGATTCGTCACCTTCAGTTTGAGGATTTGCCCAAGCCATCCACCAATTACTAGCAATCTGAAGAAATTGGAAAGCAGCTTGTGCGAGTATAATAAGAGGAATCAGAGCCCCTTTATATGCAGCACCCATGTATGACAAGTACACCTTCATGCTGACTTTTCCCTTTACTCGTTCCTCTTCTTGAACAAGCTGCTTTTTGCGGGAACGCTTAGCTTTCTTCTTCTTCTCTTTGATTGCCTTTAGATCTGAAGCAGATCCTCCCTCTTGTACTTCCTTTGCCA
>c16144.graph_c0
AATTGTAGTACCCTACAGACCATGTAGTTGTAATACAAAATTGTTAATCTACTAGGAATTTATCGTTCATAGAAAATATGTAGAAATGTAAGTACTATGTGATTAGCCAACATCATCAGTACCTACTGCCTCACATTCTTCATTCAAAATATTACCTTTAATAGTTGATGCTTGATTGGCTGCAGACAATTATTGTCTTGTTTAATTAAACCGAAGTAACCACTGGACGGTGTAACGCAGTGAAATGAGGTCGGCGAGAAATGGTTACATATTTGTTGTTTGATTTTCCACAAAGTTAAGAGTTATTCGAGTTATTTACA
>c16145.graph_c0
GCTCTCCTGTAGCCAATCTCCAAATGCAGACAGCAACACGTTGGCGAACTGGAATTGCTTGACGAAGCATTGTGTCCTTTTTAGTGACTACAGATTCCAATTCTTCACAGATCATATCAAAAGTTGCTCTGCTCACCCTAAACGCCTTTTTAAACTCCTCTTCTGGAAAATCAGGGCTATTACACTGTTCCCACCATGCTTTAGACCTGTCTTTCACCCATAACCTCCTTTGCTGTTGAGGCTGAGATTCCTCCTCCGAAGTTGAAATGAATTCAGCAGAACCCTGACGAGACCTTTTGTTATTCGT
>c16153.graph_c0
GGTTGGCTTAGCAGTAGAAGCAGCAACCAAAGCTCTTGAAATGGCTGAGGTTGTTCCTGAAGATATTGACTTAGTCTTGATGTGTACTTCCACTCCTGATGATCTATTTGGTGCTGCTCCACAGATTCAAAAGGCACTTGGTTGCACAAAGAACCCATTGGCTTATGATATCACAGCTGCTTGTAGTGGATTTGTTTTGGGTCTAGTTTCAGCTGCTTGTCATATAAGGGGAGGCGGTTTTAAGAACGTTTTAGTGATCGGAGCTGATTCTTTGTCTCGGTTTGTTGATTGGACGGATAGAGGGACTTGCATTCT
>c1616.graph_c0
GCGCAATTTGTCTTACATGTCTCAAAGCAGCAACAGTCATTTTCTGAGCAAGAATCTTCGATGATTCATAGAGAGGCCTCATGACTTCAGGGACACTCCAGGCATCCAGATCAACATGATCAACAATGTGGAGAATGGAACCACCACCATCGCAAGGACGGATGAGAAACCCGCTTGGTTTCATTTCAGCTCTCACAAAGTTTGAAGAAGGTGGCCCAGTGGGGCCACCAGTTGCAGAAGTAAGCGACCTTTCACAAACCACATAGCTTCCATCTTCCAAACATGTGCTATATCTCAGCGTCCAAAAGTCACGAGCTGCTGCTAAAGTCGTAGGAGCAT
>c16161.graph_c0
GGTCTGTTTGTTTGTTCTGGGAAATCTCCGATATTGCTGGACCTGTTTTAACGAGAACTTTACTGACAGTTAGCTAAAATTATAGCATGTTATTTTATTTGTCCGTGGCATCGTCCGCAGTGCTATATCCAAAACGTTTGAACCGGTTTTCACGGGATTATCACTGGTAGATAGGTGACAACATAAAAAGTAATTTAGGTTTTATTTTTGGAATAGCTGTTCTCCGTGCCTTCCTGCGCAGTGGAATACACGAACTGCATCGACTGATTTTCACGGGACTTTCACAGGCAGATAACGACCATCATAACAAGTAATTTAGTCTATTTTAA
>c16162.graph_c0
GTGATATTGTTACAACAACAACTCACAAGTCTTTGAGAGGTCCGAGAGGTGGCATGATCTTCTTCAGGAAGGATCCAATTAATGGGGTTGATCTTGAATCTGCCGTGAACAATGCTGTCTTCCCTGGTTTGCAGGGTGGCCCTCATAACCACACAATTGGAGGATTAGCAGTCTGCTTGAAACACGCACAATCACCGGAATTCAAGGCGTACCAGAAAAGAGTTGTGTCTAACTGTAGAGCTCTAGCTAACCGATTGGTTGAACTCGGGTTTAAGCTAGTTTCTGGTGGCAGCGATAACCACTTGGTTCTCGTCGATCTTAGACCCATGGGTATGGATGGTGCGCGGGTTGAGAAAATCTTAGACATGGCATCTATTACTCTCAACAAGAACTCTGTCCCTGGGGACAAAAGTGCGTTGGTACCAGGGGGAATAAGGATAGGATCCCCCGCGATGACGA
>c16163.graph_c0
GGCGGGTTTTCTTTAAGAGGTGAGAACTTGGAATCTTGCAAGCACTGGGAGTGGACTCCGGCGGCGGCGCAGACGCGGAGCAGGGAGCGTCCTCGGGCCACCTGCCTCAGGAAGAGTTCCTCTGGCGGACGTTCTTGCCTTTGTCATTCTGGTGCTGCCCGCTGCTCTTCAGGGGTGCAGAGCCGGCGTCGTCATCATCCAGGACGTCCTCGGGCTTCCGGCGCTTCTCGTAGATGAAGATGATGGTGACCAGCACCAGCACCTCAGCCACGATGCCCAGGAAGGGCCAGAGGGCGGCCAGGTGGCTGCGCACGCGGAGCGTGATGATGGCCTGGTCGGAGCCCTTGGAGCTGGTGCCGT
>c16173.graph_c0
GTCAAAACATAGTAATAATAACCAAGCGGAAGTACAAGCCGTCAACGAAAAGGTAATAAAGCATGAAAGGAATAGAGGAAAAAGTCGCCACACCCAGATGTCGCGATATGACAACTGGTAGTGTGGAGACAGCGAATTACCAATCAAAAGTAAGAAAGAAACCCGGGCTGAATATACTAGAACAAAAAAAAAAAAGCTGTAGCGAGGAAGTAAAAATAAAATTGGCATTAAAATATAAAATAAAATCAAAATAGAAATTAACAGAGAAACGGAATAAATTGTTAAATAAAAGAGAGAAAAAAGCAAAAAGAGTCTAAATTCAGTTTAAGAAAAAATTAGAAAAGAATAGGAAACGTTGAATTCGTGAAAACCCG
>c16185.graph_c0
ACATATTCTGCGCCCTTGTCGATGTCGTTTTAATTTTATTTAATTTGAGGTTATTTTGCAAAAGAGACAATAGAAAAGAAATATCTACTGTACCATTTGGAGCGATTCAAACTCTTTGATTAATTAAATCGCTAAGCATCAGAAGACTGATTGGATAAGGAAAATGTCGAATAGAAAGAAAATTCTCATTTTTAATACAAATTTCTTAAACTTCCCTATGCTATAGATTTAGGCTTTCCCCAAGCCGAAGTGGAAGTGACAATAAATATCAAAATGAAAATTATCTTTATTTATCAAAAGTTAGATCAAAAGGATG
>c16190.graph_c0
GCAGACACGGGGCTCCAGATTCATCAAATTCCAGGAGATGAAGATGCAAGAACATAGTGATCAGGTGCCTGTGGGAAATATCCCTCGTAGTATCACGGTGCTGGTAGAAGGAGAGAACACAAGGATTGCCCAGCCTGGAGACCACGTCAGCGTCACTGGTATTTTCTTGCCAATCCTGCGCACTGGGTTCCGACAGGTGGTACAGGGTTTACTCTCAGAAACCTACCTGGAAGCCCATCGGATTGTGAAGATGAACAAGAGTGAGGATGATGAGTCTGGGGCTGGAGAGCTCACCAGGGAGGAGCTGAGGCAAATTGCAGAGGAG
>c16195.graph_c0
GGGGACTTTGTTTTGTACAATGTAATGAAGTATAGATAATTAGAGGTAAAGCTCGTGAACTATGACGAATGGAGCCTTATAAGTAAAGGCTTACGTCGTTGAAACTTGACTATAATAAGGTTTGCAAAAATTGTTATGGACTTGTTAAATACATAGATATTACGAGTTCCTTTTTAAATGCTGAAAACAGTATTGAGTACTGTACAAAGATTGTATATTGTAAAAATCCCGAAGTATGACGAATAAAGTCTTATAGACAAAGGCTTCCTCCACTCGACGATGGGAAGGAAAAAATGGTTCCATTTCTTTTATTTCGAGAACACTAATTAGCTATTATGCAAAAAGATAATAAAGGAAATCGGTTAACAATTAAAGACAAGAAGGTACTGAACTGTTTCATCTTCATCTATTTATATACATTAGTAATACTTTCTCGTCTACATCATTTATA
>c16204.graph_c0
CAAGAATTATGGGGGAGACCGTGTCGTGCCAGTTCAGTGCGGGGAAGCAAAGGGGCAGCTACACCAGCAGCATCAGCAGCAGGGTTTTCATCTGGGGATGGAGTATGAGTCCTCGAAAGCTGCCTACAGCTACAACCCTTCAATTAGCCACAGCGTCTCTGTGTCATCAATGGATGTTGGCGTCGTGCCAGAAGCAACAACTATGAGTGATATCTCAATCTCAATCTCGCATCCGAGACCTCCTAAGGGAACAATCGACCTTTTCTCAGGCCCTCCAATTCAGATGCCAACCCAGCTGACTCCAATGGATAGGGAGGCAAGGGTCCTGAGGTACAGAGAGAAAAAGAAGACAAGGAAGTTTGAGAAGACAATCAGG
>c16209.graph_c0
GTTCATCACGTGGGTCGATGGCGGTTTGTTGTGTTGCCATGTTATGGAACAATAATATATATTGCCGTATATATTACTTTTAACAGAAATTTATAAATAAAATCCACTATGGATAAATATATGTACCAGGTAAATAATTTTTAATGTAAAAATAATCTGGGTTTTATTAAGGAATGTCAAATGTAACTTCTTTTTGTGTAACATAAAATAGACCGTTGTACACCGTTCAAAACTACGTAAGAAAAACTTTCTACAGGTAGGTACTTCAGTAAAGTAAACTCTATAAAAAAATAAATAATAAATCACACAAGAAATGTACGCACATCGGAATACATTCTATTTA
>c16216.graph_c0
GGCCAGGAGAGGTTCTAATGACTTGTGCAATGGCACTTTCTTTGCCTGCAACTAGCTCGATCGCAGCATGTCCAAAGGGGACATTAAAGTACTTAGAGTCTATGAATTTCACTGCCTTGAGTGACTCTATGATCCAACCAGGTAAAGGTGATGTGAGATCTTCTTGTTTAGGTGGGAGTAGGACTCCTTGTGTGGAGTTCACTAGACGGTGAGGACCTTCTTCGAACCCTCCATTCTTCACCAAGTTCCCTCTGGTGTAGATTGGATGAACAAGCTCTTTAATGGCGACAGCGTCCAACAAAGGACCACAAGCAGGATC
>c16218.graph_c0
CGGGTTTTATTATAGACATAAGGGAAGTGATTTAATAGCATTAGTAAATTGACACGAATACGACTGTGGTACATTTTCAAGTCAAAATAGCCACACATGAAGGCTTATGAAACTCGTTATTAAATATTAAGTATACGAATATTTAATAAAAAACGTATACTTTACAATCATAAGAGTTTATGATGAAGGATATTAAACAAAATACTAATGAAATGTGTGTCGACGAGAAAGAGAAACCGTTTGTAATGTGGGGTAATAACAAAATTACACTAGAAACGGAACCAGTCACCGATAAGGCGATATTGGAAAAAGCTGAAAAAGAACTAAGAGAAATTCCGGAAATTGTAGAAACGGCTTTAAAAGAGTTGCGAAATCTCCTAGAAGGTGAGAAATCATTATCCGTACCCATTGAAAATGATGATTTCCTTATGAAATTCTTGAGGCCTTGCAAATTTTATGCGGAAAGCGCTTTCAAAAGGATACAAGCGTATTATAAGTTTAGAGTGTCGCACGTTGAACATTGTTGCAACCTCGTGCCGTCTGGTACTCGAGCAACGTTTGACCAATCCATCGTGTCTGTGTTATCGCCAAGAGATCAACACGGACGTCGGATCATGTTAATAGAGGCTGGTGAAAGATGGAATCCTCGACTGGTGTCTTTAACGGATGTGTTCCGGGGTACACAGATGGGACTGGAAGCGGCGATGAATGAACCGTGCACACAAATTTGCGG
>c16237.graph_c0
CAATACTTTCCCAAAATGGGACAAGGGATTATCGTCATCTTCACAGGGTTTCTGCCTCCTGGACAATGGCAATGGATTCTAACTCCTCAACAAGGAAGAAGGAAGAATTCTCAATAGAGATTCAGGCACCATCTGTTCCTCAGTTTAGAACAGAAAGGCCATCCAATCTCCAATTTGACCAGCTGCAGCCGTCAGATGAAGAATTCAATGAAGGGAGCAGGGCTGAGTTTGGACCATTCATGGCACGAGCGGCTGTGCTGGATGAAGAATACTGGACAGCAGCATGGCTGCGAGCAGAAAG
>c1624.graph_c0
ATTGATACTCCGGTTTCGATTAATGAAATAAATGCTTATTACCATATTGCTGAGTGCGTGGTCGTTACAGCTGTTAGAGATGGTATGAACCTTACTCCCTACGAATATATCGTTTGTAGACAAGGTTTACTTGGGTCTGAATCAGACTTTAGTGGCCCAAAGAAGAGCATGTTGGTTGCATCAGAGTTTATTGGATGTTCCCCTTCGCTTAGTGGGGCTATACGCGTAAACCCATGGAACGTTGAAGCTACTGGAGAAGCACTAAATGAGGCCCTCTCAATGAGTGATGCTGAGAAACAGCTACGGCATGAGAAACATTTCCGGTATGTTAGTACTCACGATGTAGCTTATTGGTCAAGAAGTTTCTTGCAAGACCTAGAGAG
>c16240.graph_c0
ATCGGCTTGAAAAGTATGGTCCTTGTTGATGGGTTTTGCAAATAGAGTTTCATTTTTGCTAAAATCGGAAGCAACTCTTGTTGTATCGCAGCGTATACCTTTTGAACAAGTTCAACCACCTTATCTGGTGTCGCGAAAGCTTGTTCCTTCAGCGGCTTAGCCATGACAGAATCAACTTTGTGATTCTGAGTTCCGGAGGAAAGAGCAACTTTTATGGCTGTGACCTTCGTCACAAATGAAAGCATAGGATCCACAACTAGCTTAGTTACTGACATGATGAACTCCTCACAAGTTGTCTTAAG
>c16254.graph_c0
GTGAGTAACCACCTTTTTAATATTTTGAAATTACCATGCTTCGTATTTATGCAAAGGTATATAATGCCTTTAGCAAAATAGTCAATCTAATCAAAAGAATGTCTAGAATGCTTCAATAGGTATCAAATTGCCCTTCGATGATGCATAAGCCTTGCTTTGCACAACTGGTTTATGTTTTGTAAATTTAATATTTTTAAAGAAATAGGTTCCATTTAAAGGAAAGCATAAATTGTAAAAGGAAATTCCTTTAAGAGAATGGTATACAGACTCATGTTCATTGTAAATTAATTTTAATATTCAATCAATTTGTGATCTTAAATATTGCGTGTAGAACGTGCAGA
>c16260.graph_c0
GTTGCAAGCGATCCTTTACTTCCGCTTCAGCTTTAGCTTTCTTTTTCTTTGCTCGGCGTTTGACTGCAAGTTCCTCAAACCTCTTCATCCCAGTTTTGAACATCATCTTCACCAAAAGCTCAGGTTGGCCTCTCACAAAATACTCATGTCCACATTCTCATTGCTCTGACTCCTTAATTCTTATGTAAGTTGAGTTCGGTCATAAACTCCAAGTAATGTCTGCCAAATTCTATCGATTTCGGCAGAACTTCTCGGTGAAGCGCTTCCAGATTCCAACGATGAAGCTATTGTGGCTTTTGCTCCACGAGATAATTGGATCCAATTATGGATCATCCACGACATTGTATCTTCTTGTAGAATGTACTCAACATAACTTCAAACAAGAAATCATGTAATTTGCATCACTAAAGCTCTCTTTTGTGTTGCTTACTGCAGTGAAC
>c16267.graph_c0
GGTTATTTTATGTTATTTTTACAAAAAAACTTGTTATATCTTAAGACAAATAACTGCTGTCACTCCAGGATTAACGTTCGGAGAAATTCGAAAACATACCGAAATTCATCCACTAAAATGTTGCCTGTCGCGTTTCCATAGAAAACTATGAAAATAAAAAATAAAATAAGAGTTCTATATTTGAAATCGGAACGCACTTATTAACTGCCAGTCGGACATTTTAAAACAGATGTTCCACCTTCGTTCTTGACGGATGGGTCAGGCGAGGTCGGCCGCCATCTTGAAAGACACCCGCCAATCGGTGCATCCCGGGGTGCCTATTTGTAACACTTCATATTTTAGCTACCAAAAGCTTCCGGGCACAGTCGATGGTTGAATAAAACATAAGTCAG
>c16276.graph_c0
AATTTATGCTACAGAGTGTGCGAAAGAAATATACATAATTTTATTCCACACATTGCCTGGAATTGCAGTAAAAAGTGCCATTATGACATAAATTTATTTAACTTTCAGTTTGATAACATTTTGAAGGAGTTGGGTCCATTGTAACATTATAAGATTTATAGGGAGTTCAGTTACGGACAGATTCATATATCCCTTATTAGAATCCTTTTATTGGCTTGTAAGCTACAAGATTTAAAAGAAAAAAAATGTCTTGTGTTATTAATACGGTGCTTATTTTCTTTCGTCTGTGCATAAAATATATCTTA
>c16296.graph_c0
CCCAATGCCAACAAATTTGTATTACAAACAACGGAAATAAATTAAACTAAACCAAGTCTCCTCCTACAACAAAATAATGGTACCATCTGGATGATACGGCTTCACCACCTTAATCAAACAAACTGAATCCCATATCCTCATCAGACTCCTCCTTTTCTTCAACCTTCTCTTCTTTCTTAGCCTCTGGCGCGGCTGCAGCTGCTGCAGGAGCTCCGCCGCCGCCGCCGCCGCCGGAAACCGCTACAGCCACCCCTCCACCCGAAGGGACCGAAGCAAATTTCTCCCTTCCCGACGCTATCACTTCTGTTATGTCTTTGCCTTCAAGCTGACTCAACAGAAATTCGATTTTATCGTCATCACCATCCGCTCCAACTGAGCCGAGAATGGATTTAATGTCGTCTGTAGAGGGACTGGTATTGCCCCCCAGTACAGCAAGCAGGTAGGCCGCCACAACCTTCATCCTCGCCCTCTG
>c16309.graph_c0
GGACAAGAAGAAGCCTATCACTCGTTCTTCTCGAGCTGGTCTCCAGTTCCCAGTTGGTAGGGTGCATCGTCTGTTAAAGACAAGGTCCACTGCTCATGGAAGGGTTGGAGCAACTGCAGCTGTTTACACAGCAGCAATATTGGAGTATCTGACTGCAGAAGTTTTGGAGTTGGCTGGTAACGCCAGCAAGGACTTGAAGGTGAAACGTATCTCGCCGAGGCATTTGCAGCTTGCGATTCGTGGAGATGAGGAGCTCGATACTCTCATCAAAGGAACTATAGCTGGTGGTGGAGTCATCCCTCATATCCACAAGAGTCTCATCAACAAATCCGCCAAGGAATAGGACTTTTTTAGTTACCCGCTTTGTTCTGTGTTGCTTTTCTGTTTTCTAAATGTTTTTAAGAGTTGTTGTTTGATAAGATGCTAGAGAAGCTCTTTTTAGG
>c16310.graph_c0
AGGTAATTGTGATTAGTTCCTAAATGACATTAGTTAATAAGTGCTGTATTTATGTACTTCGACATCCAGATTACTAAATTTCACATGGGCAAAGTCACAAGTAACAGTTAATATGAAATAAAATAGCTGTAATAACTTTAGTAAGTCCTGTGAAAATTGATTCAATTGCTTCGGATATTCCAAGTGAATGAAGTCACAAATACAACAGCTAGTATCGAAAATAGCCCATGTTACTTTTTATAGCGTCAGCGATATGCCAATAAAAGGCTCATGAAAATTGATCTGTGTAGGACATCACACTGCTGTTGAAGTCGCGAATATCTGCTAGTCTAAAACAATATAGCTTAAGATCTGCCGGTGAAAATCGGTCCAAGCTTTTTGGATATTCCACTGCGAATGAGGTTGCGGGTAACAGCTAGCTTAAAATGGAATTGTCTAAGTTATTCCTTATAAGGCTAGCTGCAAGTGGAAGTCCTGTGAAAATCAATATAACCGTTTTGGAGATTACACTGTGGACGAAGTCGCAGGTAAAAGCTAGTCTAGAAAAAGGTAAATTATTTTTATAAAGTCAACTATCTACTAGTGGAAGTTCTGTGAAAATCGGTCCAACCGTTTTG
>c16345.graph_c0
GCGGTCTAGGATGCAGGCGGACAGGTGTGGAAATAGATCTGTTCTAGATACGATATACTAGGTGGGTGCTTTTGAAATCGAAAGAAAAACACAATAGCCAGACAGTAATCTCTGCTGGTGTATTCGACAAACTCCAAAAAAAAAATCAATAGGAAAAAATCATATAGGAGCTACAATTAAATGTATAAATATTAACATTTATATAACTTTTAATATAAGAACAGATCACTGAAAGAGTAGTGAACCTATTTGCCTTTGAAATAAAATAAAATTTCAATTCAACATATACATATCATATTCA
>c16348.graph_c0
AAGTTTAACCGATAGGTAGAATCGCAATCGATAAGATTTTATCAATCTTAGAATCTAAGAATATAAAAAGGTTTTGATGTTCTCAGACAATCTATTGAGATATTTATCGATTATTTCGAGTAAACTGATTGTTTAGATTCCTCACCGTGCGATGTCAATTCAATATTCACGATGATATTAACATATTGTCAAATATACATGTTAATTCGTGTGTATATGTAGGTAAACAGTTCGCGCTCGTTTGTTTATGTTAATGTCTTTATGCCATATTAATAATTCAATAGATTTGATAAGAAATTAAACAACAAAAAATGACTGATCAATAATAAGCGTTTGTTCATACTTTTATTAACTTGATTCTTCATAAAAATTTCTGGATCTTTCGGATAATAACAATATACAAAATAACAATATTCGGGATGTAAGAAA
>c16361.graph_c0
AATAAAATTTATCATTTAGGAGTAAGTAGAGATGAGAAAACACTTTTACCATCGGTGTATCTTAACAAGTTGCCTGATGAATTTCCCAAGAATTCAAGAGTATTTTTGGTCGACCCAGTGCTTGCCACAGGTGGTACCATAATGGCGGCGATGGATCTATTGAAGGAACGTGGTTTGTCTGTTCAGCAAATCAAAGTGATTTGTGCGATTGCTGCACCTCCTGCACTATCGAAGCTTAACGAGAAATTCCCCGGGCTTCATGTATATGCTGGAATTATTGATCCTGAAGTCAATGAAAAGGG
>c16399.graph_c0
CATATATGAGATGTTATATTTCATAATGAACCTAGTGTTAAGACATGACAGAACTTATAAAATCGTCGATCGAACTTGCTTTTACTTCGATATTTGTAGGACTCGATTTTTATGACAATCTAACGATATCGACTGGGTGGTATAAACCCTTATCAACTGGGTACTAAGACCGCCGAGCGAATGGGATGTAGAACTCTGAATATGTGAACAAGCATCGGTAGGACGTTCATCTTGACATCGCGATACAGCTGTACCGAGAGATAGCAGGATGGAAACTGTCAGCCGCCGAGTAGAGCTCTTATATCAACATATTACGATATCGGCAAGAATAAAGCGGAG
>c164.graph_c0
GTAAAATGAGCGGATGTCTGGATCGACGGATTGAACGATCCCGTAATCCGGAAGAAAGTCCTTGCGGCGCGGCAGTTGCATAAAAGTCCTAAGTGCGAGCCAGACGAAGTACGCACAAAGAGTCGGGGCCTCGACAGTGTGCAAAGGCACCTCTTAGTCTAGGCGACCGAGGCGCTTCTGGAAGGAGACAGTGCGTGGCCCGAGTCAACCTTTTGGTGGTCGAAATCATGCGTTATTTCACGTACATGGGCATGTGCTACATTTGCCCAATGTGTCCGCCACCTGTCTACCGGAATGGTCTATGCTTTCGGATGTACAGAGGCCGGTCGCAAGACGTTGCATTGCCACGTGTCGATGCCGGAAGACCGGCAAAGTACCACACTGGGGGTCCGGCTGTATGCCCTCTCCAGGTAAATGCAGGCTACCACCACCACCAGCGCCAGCTT
>c16400.graph_c0
GGAATAGATGGATGGCTATCCCTTGGAGGCATTCTTTTATGCATCACAGGAACGGAGGCTATCTTTGCTGAACTTGGCCAATTTACAGCCACATCTATAAGGTTTGCGTTTTGTTGTGTTGTTTACCCGTGTCTGGTGCTTCAATACATGGGCCAAGCTGCGTTTTTATCAAAGAATTTTTCTGCTCTACCTTCAAGCTTTTATTCTTCCATTCCAGACCCATTTTTCTGGCCGGTTCTCATGATGGCTATGCTAGCTGCAATGGTCGCTAGTCAAGCAGTCATATTTGCCACGTTCTCGATTGTCAAACAATGCTATGCATTGGGATGCTTCCCGC
>c16401.graph_c0
CAGCGGTCTCGGGGACGTTGCGGAGAGGGCCCAGCTTGATGAAGGGGCCAGCCAGCAGGAAGCCGTGAGCAAGGCCAATCTCCACACCGCGGAGCACAGGGGCGACACCCGTGCGGTAGGCGGGCAGGTTGCTCAGGTAGGTGGCAACGATCGGGGCAGAGGTCACCGGGGTCTCCAGCATGCCAACGAAGGGGTCGCCGTTGACGGGGCTGATCACCTGGGCCTTCTTGGTGTCAGCAGCGCACACGCGCACAGTGGACACACGGCCCAGGCCCAGGGGCATCTGGCGCCGGGCAGCGGTGGCACGCAGGCCGGTGGAAGAGCGCATAGCGACGGCCATTTTGTTGGGTTTGGGTGTGACTGGAAAGTGTCCT
>c16402.graph_c0
ATATATTTTTTTTTACAATTTCTTAATTCATCACATATATGATACAAAATATCAATATGAGCTGTACACAGGCTCTTATACCATCCGTCGCTAGCTTAACGCAAGCCGCGCCAGCGCAATACGGTCGGTCACGATGCATGCGAAATTATAAATTTATCTCCTATCAAAAAAATACCGCTCAACGTGCTTCAGACAATAAATATGTTGATAATTTTTAAAGGCAAATTTTTTTTCAATAGTCATACAAATATGAAATAACTTTCAAAGAGAGATTTCAAATAGAGACACTTTTTCTTAGTAATTCAGTATATTTATGGTATCTATGTGTAATGGTATTATACACTGCAATTGAAAGGT
>c16408.graph_c0
CTTGGTATCAACTTGGTAGCCAGAAGCGTCCCTCACGTAGAATGTGTTAAGAGCTTTGTCTCCTTTTGTTTTCACTTCAGCTCTTGTTACTGTGAGACTGTTTTCGCGGAAGATTCGAGTCACATCCGAGAGTAACCCGACTCTATCTGAAGTGCAAAGCTCAAGCTTCAACCCCTCAGAGACTCTTCTTTGAATAGCTGCTTTTAGACATTTGATCACTCGCTGTCTTTCTGCCTCGGATTTGACAGGAGATCCATCCGTATGTCTTATGTAGTATTCCTGATAAGCTTGGGGGCCTTCAGCGTCAATGCTAGCATGTGAAACGACATAATTCATATCTGTCAGAG
>c1641.graph_c1
TTTAAATTAACGCAAGGAACAGCTATGTACGAGTATATCAACAAGTTGGTTTATGCTGTTGTATCCGGAAAACATAATACAAAGAAAAATGTCAGTCAATCATTGCATATACCTCTTATGTGGTATACAAAGAGAACAACGCATCATGTTCCTCCAACTTTATCCTGCCGTTTCTTCTCGTTCGTTTAATCCTGAGATAAGCTAATATCTTAATAGATTTCTATAGGGTACTTTCGGTAAGCTTCAGTTTTTACTTCCAAGTACATCTACATTGCATATCTTTTATTTTTCTTCTCATACAGTTACAG
>c16428.graph_c0
GTGTTTTCCCTCGTTAATATATTATTTATATTAATTAACACCACAAAGTACAATACATATATTGTTCATAGAGTTATCACCCTTTTTTTAATTAGCTTCACTAGCGATAGATGATATAACTAATTCCGGATATTTATATATGAATGTATGTATAAAGTGGTACTTTCGGTACTTATATCTATAAAATGATCTTAATAAGTTTATTCTGAAAAATAAAGAAATATTTATTTTAAAAACAGAGGTATAAAAACAATACTATTAAATTATTTAATTTTTAGAAACAATATCATATTTATATTAATTAAATAATACTAGAATATAATTTTGATGTCTAGTAAAAAAT
>c16438.graph_c0
ATAATGTTTTCAAAAGGTTAGAATTATTTTCTAATAATATGAAAGTTGCAAAACATCTTACCCTAAGTACGCCCATGTCAAGATTTTAAAATCGAAACGATGTAATTAGTATGATATATTCGATTATATTGAAGTAATGAACGAGATGTTATTAATGAGTCGACCCAATATGTTCCGATATATTCCAATCGTGAAATTAAATACGCTTACATTTTACAAAATACTATTGCAGCCTATTTATACGATTATTTTCGGATCTAGTAGTTTTTCTAATCAATTTGTATTTTACATATTGAAGTTCAATATTATTTTCAGATGTCA
>c16455.graph_c0
GGTAGGTAAACGGTATGATTTTATGTTTATTTTCATCAGAGAAGCGTTCAGGATCAAATTTGTATGGTTCCGGGAAATAATTTGGATCATGATGCATAGACCACACCGGAATCACCACACTTTCACCTTTTTTGAGTATGAAGTCATTCTTGGCTTTAGCGTGAGGTTTACCCATGTTGTAATTCTTAACGCAAATGCGACCCAAGCCAGTTACAGGAGGCCATAAACGCAATAATTCTGATATAACCATGTCCAAATATTTAAGATTCTGAATAGAGCCGTAATCAAATTTGCCGTTACTTTTAGTACTATTCTCTTTGATCTCTTGTACTAGCTTCTCCTGTACCTCAGGGTTCACGGCCAGTTCGTGCAGGAGGAAAGACAATGTGGAAGAAACTGTTTCGAAACCAGCAATGAAGAATAGCGTCGCTTGTGCTACAAGGTCAATATCTGACCAAACGCGATTAATAGCTTTCTTGCCAATATCTGACTCCTCTACAGTAGCGAATCCAGT
>c16463.graph_c0
CAATAAAAGGGCCATGAAGGAACACTTGCAACAACAGAATGAACAATTGGATGGGCTCGTGGTTAAAGTAAGACAAGATTTAACATCAAACGACCGCCTGAAATTTCGCACAATAACAACAATAGATGTTCACGCTCGCGACATTATAGAGGGATTTGTGCGTGACAATGTAACAGAGGCTGCCGAGTTTGAATGGGAGAGTCAACTGAGATTCTACTGGTTAAAGAAAGACGATAATCTTTGGATTCGACAGTGCACGGGATTATTTGAATACGGATATGAGTATATGGGTTTGAATGGGCGTCTGGTGATAACTCCATTGACTGATCGTATCTATCTCACGATTACTCAGGCTCTGACAATGCAACTCGGCGGAGCACCTGCAGGGCCCGCTGGCACCGGTAAGACGGAAACCACGAAAGATTTAGCAAAAGCTTTGG
>c16480.graph_c0
AATAATTCTAAGACACTGTAATAGAAACTCGTTTGGTAATTGGCAGTAATGGACTTTGATAAAGAGCATTAATTGACAAACTAGAAAGAAGAAGATCGTGTATTTGTGTTAGAAGCGAGTGTGAAATGTATAAGACTCCCAAAAAGCATTAAAAAAATGTTTATTGAACTTGTCGACTGCAGCAATATTAAATATCGATTATATTTAATAAAATCTAAATAAAAGTGAATTATTCTAGTAAGATTTTACATTGTCATAATAATTAGATAAATATTTATTTTAGCCCTATATTATTGTTGTATAATAAAAGGGACTCACTTCAAATTGCGTACAGATAATAGATCATTTTCGTTGCGTTGCTGCCAACATTAAAACGGAGATTCCTTTTCTGCGTATCGTATAACTGTATTCTGCCAGTTCTATGAGTT
>c16483.graph_c0
CAAGGATTCGAAGCTATGTTGTTCGACGCGATGTCCAATACACCTAAGAGCCACATGGAATATTTAAACTCTATGAATCCCTTGTAAGTGACCCAGATAAAGGTTTGACGTCACCAATGGTAGGTAAAGAATACAAGCTTCATGCATTATTAAAATATTTATACATATTTGGACAGTACAGTTCGTCGTCCATTCGTACACGTGACTTCTAGAAACACTAATTAAAAGGCGACTAATTAATCATCGCTTTTTTTTATTTAAGAAGTCAATATCGCCATATTTTGTGTTTAAGCAGCCCGCAG
>c16503.graph_c0
GATCGGAAGTTTAATATTTGCAGGTATTGGTAGGATTTTATGTTGAATGACACCTTTTTTTCAATCAAAATTTCAACCAATCCTTCCAATTACTTGACAACCATTTCTATAACACAATGGAGATTGCGGAATTCTTGAAATTATCTGAAAATTGGGACATGTCGGTTTCATTGTAAACTGTTGACTTAGAACTTTAGGAATCCTCGTGTTAACTACAAAAGAAAGTCGCAACACCTCCTTCCAACTTTTATTGTCGTTAAATAAGTTGCATTCGAGTTTTGCCAGATTGTAGTATTTTAAAGGGG
>c16520.graph_c0
CACAGAAGTTGCTGCCTCCATTGGACAAGCCCTAAACATGACAGCTGAAGAAAGAGAGAAAAGACATCGCCATAATTTTCATCATGTCAAAACTCACACTGCTCAAGAATGGGCTGAAACTTTTGTCAGTGAACTAAATGACACTGTAATTGAGGCGCAACTACGAATTAGTAAAGTCCCACCAGAGCTTCCACAGCATGATGCAATTCAACGGTATTCAAAGTCCAACAACAGGCTTCTAATCCTGGGTTTCAATGCAACATTGACTGAACCAGTGGATAATCAAGGGAGAAGAGGTGATCAAATAAAGGAGATGGATCTTAATCTACACCCTGAGCTTAAAGGGCCCTTAAAGGCATTATGCAGTGATCCAAGTACAACCATAGTTGTTCTGAGCGGAAGCAGCAGAAGTGTTTTGGACAAAAACTTTGGAGAGTATGACATGTGGCTGGCAG
>c16527.graph_c0
ATACAACATACCACGAGGCACCCTCATCATTATGGCGACACAAGACGCGTCATTGAAAGAGAGTAATTACGACGATGCTGCCAGTTTCTTTCCAGAAAGATGGTTGAAGCCAGAAGCGAAGGAGTATCATGCCTTTGCTTCGATACCCTTTGGCTCTGGAGCTAGAAATTGTTTAGGGAAAAATATTGCTGAAACTATGTTATCACTCTTAACTATCAAGATAATACAGAAATATAAACTTGAATATCATTATCGAGATATAGAACCGACGAGAACCTTCATAGCAAAACCTAAGAGCCCTTTGAAAATAAGGTTTATAGATAGGTTTTAAACTTTTTAAGAAATATAAATATTTTAGTTATTCCCGCAAAAATGTAGAGACTGCATGAAGCTAACTTATTAACTCTCACTACGTTAATTCAATAACATTAATGTTATTGAA
>c16541.graph_c0
AGTGGAAGATTCCGGTGGAGATGAAGCGTCGGAGAAGGAAGAGAGAGGGAGAAGTGCTTTCTGTGAAGGGAAATGTTTGATCCGGAGTTTGCAGTAACACGGCGTAGAAGAAGGATGTACTTCGCCGCCGATTTGCTTGTTCGTCGCTGTCTCCGGTAGTCTCAAAGCTAGTGAATCTATTGTTAGCCGTACAAATGGACATGGATCCATCACAAAAACCTTCGAGTGTTTCTTCTTCTTCTTCTTCGGAATTTGAAATTTGAACTTTGAGAGATTCGAATTAGAGAGAATTTGAAGATGAAGAAGGAATCAGTT
>c16543.graph_c0
AAAAATGTTTCTAAATTTTTCAGACATCGATTCTCAAAATATTGTAACAAAAATACGTTTTTATTTCACAGTACATGAATAGTGCACTTTGTAAAAATATCACGTTTAAGTGATTAATATGTTTCCTCTTGAAATTCATTCGCATAAATCCAAGACGATACTCAAATTTGATTGTAAAAATAATTAAACCAACCAGAAGTACCTACCTCGTAATTAATGGTAATTATCATTAATTTTAACATCGAGTTACGTTTATGTCGCTTCTATTCGATTCGATAATTGGTGAAATGTGTAGTGTTTCAAATAATGTAGGCGGGTAACTAATTAATTTATAGTTAAAACCAAGAAAAAAATGCAATAAAATCCATGGAACTTTGAGACAACTGCCAAGAAATCCGATTAGAATTAAGAGCACGGCACTCGGGCG
>c16549.graph_c0
GGCGAGAAAGAGAAGGGGATCGCTGAAGAGATTGAGCAATTTGGTAACTCGACATTGGGATTTGCTGTGAAGTCATGTGTTGTTGCTGCAGAATCTGTTGCTGTTGCGGCGATAATTGTGGAATCGGAGATGAAGAGATTTGCTGCATAATCTGTTGTTGTTGTTGAGGCAATTGCTGAGTTTGTTGAACGAGTTGCTGAGTCTGTGTTTGCTGATCTAAAGATGAAGAAGGGTGAGAGAGAGGAGAAGGCGACGGGATCTGAGCTCCGATTGGTGGGTTAGAAGAAGTAGGGTTGGGAGAGGAGATGTTAGGTTGCGAATTGT
>c16557.graph_c0
GGAAAACTCCCATACGAGACGGTGTGTCTGTAATAGGAATTAAAGATCTTAAATTTGGTCATTCTATTGCGGACGTTGGCTTGGGTAATATCAAAAATGATCCTAGATTGAGTCGACCAAATACAGATTTATCAACGGATCCCATTATGCGTCCAGTAGAGCCTGGAATTACAAAAATTATATATAAACCTAAACCAGACTTTGGAAGGTTACAATATTTAGAAAAACGAACGAAAATCTTACCTGAACACCGGTATTATTTTAACGAATGTAGTAACTGGGATTATGGATGGAGGCTGAAAGATAGTGCGTTTAGAGACAAACCGATTTATGCCAGGTGCTGGCATTTAAACAGGGCTTTGCGAAATCGTGTGGGCCCTCAACCGGACCCACGACACTACAAAT
>c16561.graph_c0
CTACGGACCAGAGCTGGTAGTAGGGGGCTTCTTGAACTCGATCTTGTCGACTTTAACTTCTCCATCGATTAGCTCATAGACATAGACTACAGCTCGGAAACCATCGATGTCCATAAGGACAAAGCTTGGGTTAACGTCTTGGTTTATGCTGCTGTAAGCTCCGGTTGCAGAGCCCGGGTTTATCACCACTCCTCCCTCGTGTTTGTATGCTGTGAACTGGTGGGTATGGCCTGTTACGAGAATGTCGACGCCCAGTTGTCTCTGAAGCATGGCGAGTGAGTCTAGATCACCCCATGGGATCACCTGG
>c16572.graph_c0
CGATGTTATAATTATTGTTTTACTGAATTTAAGATATTACTAGCAAATTGATTTTATTATTTTTTATGTTTTAATTTGAAAAATCGCATCATTATCTTAATATAAATAATCGCTATAACAATATTGTTCTGCTTTTTATGATCCATTAAAATAGCTCAACAGGCATATGCCTATTGTTACCTTCCTTTTCGAATTACGACCAATGGACAACGCTGATCAAAATAATGTATCCATATGACATCTCTCGCCCAATATGGAGCTCAAACCAACAACCTAAAGATACATTTCTAGAATTCAGTATTTTAACTCTGTCCTTCCAATACATTCTTAATAGTCTAATGAATGTCCTCAAAAACTTAACTTAAACAAGATCGAGTTAATAAAAGACCAAC
>c16583.graph_c0
CATACTGCATGACGTGACTGGTGTTGGTGTGGGACTTGACCAGGTGGTACTGCTTGTGAAGTGTCTCTTTGGTCAGATCCTCCACATCGGAATCTTCCATCCAGTTGACGCTGTACCAGTCTCCCAGATAAGTGTCTCTGGCTTCGTCGTAGTAGCAGGCGTATGAGGACTCATCAGGGTTAGCAGCGGTGGTAGCGTAAACATTAATGTCAACAGGCAGAGGTTTCATCATGGAGCCAGATTCACAGGCCTCAACGTAAAACACCATCTTCTTGTATTTGTTGTTGCTGTGCATGTACTTGATGG
>c16583.graph_c1
GATCTGAGCAAAGAGACTTTGGCCAAACAGTTCAAGATCGTAAAGGCCAAAACCAACACCAGCCATGTGATGCAGTATGGAAACAAGACACTGTCCCACATGAAGGTGATGGCATTCCAGGGTAGCTCAAAGGGTCTTGATAAGGCAGTGGAGCCAGTGTCGTTGCCTGTGATCGCTGAACATGACCTCATGAGCAGCCCCGATGTGCCACTTGCCATCCTGAAGAGAAAACTGCAGAAGACCAATGATGTTGATGCTGTTGTTGGTTACCTGAATGAAATCCACGCTCATCTACAGGTGCGGGAGCTGCTTGGAAACACTATGCGTAAGATCGTGGAGCATGTTGTGCAGGACAAAGA
>c166.graph_c0
GATTGCTGTTCGAGCCAATCTTCCCAATCCTGAACCTGTACAGATCGGTGCCGTACGCGAGCTTCGTGGCATTCTTCGGGCTGTACCTGGGAGTGGTGAGGAACACGAGTTTCAGTAGGTACGTGAGGTTCAACGCGATGCAGGCGGTGACGCTGGATGTGCTCCTGGCGGTTCCGGTGCTGCTGACCCGAATACTGGATCCGGGTCAAGGAGGCGGGTTTGGAATGAAGGCGATGATGTGGGGGCACACGGGGGTTTTCGTCTTCAGCTTTATGTGTTTTGTGTATGGAGTCGTCAGCTCCTTACTCGGCAAAACTCCATACATTCCATTTGTCGCTGAT
>c16601.graph_c0
ATATTTTCATAATATTATTCATACTACCACCAAATTTAGAATATACAGAAGACAGAGACATAAAAACAAGGCTTTCCTTATATTCCTTTATTGTTTCATTGCGTATCCTCATATATTCATCATTCGTTATGGTTCCTTTCGAAATTGTATCGTCACCCAAAAGACAAAAAAGCGCATTTCGTTCAAATTGAGAAATAGAATTTGCATCAAACCATACATGTTCTTGAGGTGGTAGATAGGTGTTTTTAGGCATGTTATTATTATTGTTGAAACGATACGTGTTTGTTTTTGTTGGAGGAAAAGCG
>c16604.graph_c0
GCCACCAAGATAACTTCAATTTACTACTGATGCCAAACTTAATTTAAATTTTAAAATGTCTTCGAGTGACACTATTACAGTTTCCTTAAAATAAGAACGTATTGTTTTTTTTTTACTTTACATACAAATTCCTTCTCGGTAGGACCCTTTAGGAGATGTAATTCCTTAAGAAACGTTTGAGGTTACGCAAATACGGGTCGCTTTCACAAGAAAAGCAATTAGTTTCATCAGCTGTATAAAGTCCTAGCAAACAAACAAAAATGTTTGCCATTGGAACTCTTTAAAAATATTTGTCATGATTTTGAAGCAAAGAATGGTGTAAATACTATTGGAATGTGTCCGAAATAAGGACAATCATATTCGTAATGCGAAATACTATTCGTTAGAGAAAATTCGTTTGATTAACAAAGTTTATTGGTACTTTGAAATCAATATAAAGTTTACGTCAATTTATAATATAACGTTGAGGTCTT
>c16608.graph_c0
GATCCTTTAAGCCAATGAAACGCGGTCCTGCATTCGTCAAACCGTCCTCTACTGGCCAACCATTGTGGTGATTCTGGCCAGAATATTACAGTAAACAGATAAATAGATGCAAATATCCCAACCAAAGGTATATACTTCCAATAGAAGAATGTTCCTATGGCGTTTGCAACCCAAGTGCCCCAAAAGAACGAAGCTGATTTTATAGTTAGGAACATGCCTCTATAATCCGGGGAAGTATACTCTGATACGATGATAATGGATATCGTTACATTTGAGGCGTAGTTTATTCCTTGCATGATCT
>c1661.graph_c0
ATCATAAGCAGTGTAATGTTTGCAACATGCGGCGACTTTAAGGCGGTTACCGGCAGCAGTACCCTGAAGTCCCCGGACGTAGCTGGCGGCATATTTTGCGGCAACGATAGGATCTTCTCCGGGAGTTTCTTGGCCTCGGCCCCACCGCGGGTCCCTCAAGATATTCACATTCGGACTCCAATATGTCAGACCGGCCACGCCACCATTGTACATAGCTCTTGCCTCATCAGACACCACCCGTCCGATCTCTTCCCATAGAGACTGGTTGAAAGAAGCTGCGGTGGTGATGACCTGAGGGAAGCTGGT
>c16612.graph_c0
GTTGACCATAGCGTTTGCCATCGCTAGCCAGTAGAATCCGAGGTATACGTGCTGAACATATTTCATATACAGGATGGACGGGTTGAAGTGAGTGTAGATGAAGTAGGTGTGATAGGGAAGCCAGCAGATACCGAATATCACTATCACTAAGATGAACATTTTAACAACCTTGCGTTTCGATCGTATTGAATCCACTTGTCGCTGTGTTAGCTCACCGATGGACCTCGAACCCCACAGCACCTTACCCATTGCCGAATAAAAGAAAGTCATACCCAGCATTGGAATCGCGTATGTCACAACGAAGAACAGTGTTTGGTACATAAAGTCCATATACGAGACGTCGG
>c1662.graph_c0
GTGTGAACTCATATCGTGTAGTATATCAAAAACAGCGGTTCCTACTCCAACAGGAAGACCAACAGTCAAAGCAGCAGAGGGTGTTTTAAGATCATCGGAAAGATTAAATTCAGTGGCTTTTTTAAGATAAGCAAAACAAGATTCATAGCTCATTTTTTGTAAAGGGCTATTACAAGACTCAAATCCATGACGATTAAATGGACTGTACTCACCATCTCTGGTCATATAATCAGCAATAAGCATAAGATGACGAATATCAATGTCTATTCCATACACATCAAAAACATTAATAATTTCATTAATTATTGTCTCTCGGGCAGCCTCCACACCAAAAGTTTTATAAATAGCATAGATGTCATTAGAACTAGAATTATAAATATCAAAAATTTCAAGTGGATCTATTGTTTCATCATTAAA
>c16623.graph_c0
GGCCTGGCAACTTCTTTCTCACAAGACTTCTCAGTCTCTGGCATTCTGCTTCCAACTTAGCTATTTTCTTTACTCCTTCCAAGTGTTGCTTATTAGCAGATTCTGCAGATCTAATACACATGTTCTTTTCTTCGTTTCGTATCTCTAGCTCTTTAGAAACAACATGGACTTCATACTTAAGAGACTTTATTTCTCTTTCACACATTTCCAGATTGCTCTTCAGGGTCTCGATCTCGGCATCAGCTCTTGACTTCTCCTCACTGACTTTTACCAGCATGTTGGACCGCTCCTGTAAAGTTCTAGATAAAGCATCACTATCCGCTGCAGACCTAAGTAACTCTTGTTCATAGTCACACATCCTCTTTTCAAACTCCATGGTCATTTTTTCAATTTGCTTGGTCTTGCTTAAAGCAACATCATGCAGTTTCACTTCATGGTCTTTCTTCAAGTTCCTTATCTGCCTCATAC
>c16631.graph_c0
GGGATGAATTCTCAAAAGCATTGTCAAAACTCCTGCTCCTCCTCCTACTCAACTGGGAATTTTCCTGCTGCCACATCTCACCTACACTACTAGTCTTTAGTCTCTGCTGCAACTCACTTTCTGGGTTAAGTTTTATTAAGTATCTAGTGTTTTTTTGTGGTTATTTTGTAAGTATTAAGGAGAGTAAAAATAAAAGAGTTAGGTTTTGAAGAGATATTAAATATTTGGGAAGGTCAGATTTCTTTGTATGGTTCATTTGTGTAAAGTAAAGAAAGAGATTTGGACCTAATCAGTGAGAGAGG
>c16635.graph_c0
TCCTCAGATCACAGAAGCTGTAGTTAACATTGATCGGTTAATAGGAAGATTAATTGATGGGTTAGAAAAACGAGGGATTTTTGAGGATGTGACTATGATTATGGTTGGTGATCATGGAATGGTTGGAACTTGCGATAAAAAATTGGTGGTTTTAGATGATTTAGCTCCTTGGATCAAAATCCCTAGCAGTTGGGTACAGTACTACACTCCGTTGCTAGCGATTCAACCCCCTTCAGGGCACGATGCAGCGGATATAGTGGCTAAGATAAACGAAGGTTTGAGCTCGGGTAAAGTAGAGAATGGGAAGTACTTGAAGGTTTATCTCAAAGAGGATTTACCTAGCAG
>c16642.graph_c0
AGAGCGTTTTTCAGGTTTAGGTTACCTCACGATGTCTTGCTTGACCATCAGCGGATAATGTTACCAATTTCAATTAGAAATTGTAAGCGATTTAAAAAAAAACGTTGACGTACATCGGGATTTGTAACTGCGGACGTCGTAAAGACATTCCACCGGTCGAAACTACTCGACCATCACGAAAGAATGATGATAGAATAAAAAAGTTTAACTTTAAATTATATATCCAGTTTCAATTCGGTGTATTCCCGCGGTGCAATTTAAAGCCAGTTTACATATGCTTAGAAGATGAACTTAATAACAGTTGAGATTGAGGTCGAATACAGTAAAAAAGACAGACTGATTTGGGTTTACTAAATTGATATGTTGGCTCTAATAGACAGAGAACTATTTAGAATAATTGGTCACGATGATATCACTACTAGATATAATATAAGCGCTAATGTTTTTATTGAAATTATCACTTATGGCATGGGGTTTCTTTATTTAGCAGTTGTCTGATCACGGTCGCTTTGTGGATTGAAGGATTAGAGTTTGCAACTATTTTATATTTAGCATATGTTTTACTACTTATTTTTATACCTACATGATTCTCATATCTCTAATGATTGTAAAATGGACATTCATTTTATTCAGGGTTTTGTCGCAGTTTTTTT
>c16648.graph_c0
ATAAACCTATAAAAAATGTTTCAGGAAATATATATTTTTTAATAACACGAGAAGCGTATGCGAGTCTTGTAAGCGTAATTTCCTACATTTTCTAGCCTCAAAACATTCCTTAAAAAACATGAAGTTTTCTTAATACTGTGAATGAAATAGTAGTTACTCGAAGTCTATTCTTCTAGCAATTATTAACACTTGTACACAATAATCCCATGTTAAAACTGTGGACGACATTTTTCTGGTAACTTAAGTTGATTATTTTGGCAATTATTTATAATACACTTTACTTTTACAAAATAACTAATATCCCATAAATTCAAATAATCACACAAAATATAGGGTGAAATGAAATAAATTTATAAATAAATGTATACCAGTACATGATAGATGAATATCCA
>c16653.graph_c0
ACATTTTAAATATAACAGAACTACATCTTCAAACAAAAACAATGAAATACTTATTCCCATTAAATGAAATGTTTTCTTGAATGTTTAGCTCAGTTTTGCATACTCATTATGTTCAAAATGAGCAGAATATCTTGGTGGTCTTGTGTGTATGTGGTGACTGCAACTTTATAACGATGTAATAGATAGAATGGTTAAATCACATATTATAAACCCTTATTCAAAATGTTTATGAATAATAGTATATATATACCAATATTGCATTACTAAATAATTTACAATGAATAAAAACTTCCTTAGATAATTAATTCCTTGAACAACATTTTCACAGTACACAATTGTTACAGCATATTTCATATATAAATTTGTATATTATGGTATTGTTAGCAACTTTTAA
>c16669.graph_c0
GATCTAGAGTTTTTATACTATCAGAATAAATAATAGTCGACAATTTGGGATTTGTTTATGGTTTACTTCACATGAATCACATACGTTCATGTCGATTCCTTTGAGATACTGTCTCGATTTCGTTTTTTTCTCTTGTTTAATTTAAAATTATTGTAAAGCACGTGGATTTGCTTGTCTTGGTTTTGTTTTCTCCTTCGACCTCTTTGATGAAATCGAGGAACCTACAATTTCTTCGTCGATCCAAATGGTAGCTTAGTGGTGGTGATAATAGGTTTCTCCTCTTGATTGGCTCCAGCTTTAGGTTTTTTTTTTT
>c16675.graph_c0
GGGATTACAATCATATCTAGGGTGAGTTTTAAGAATGTAGCTACATGCTTACAATAATTATATCGAAAGTATTTTTTGTTTCTTATGAGATATCTGTTATTGATGAGACAGAAAATGCTCTATTTTTCAAATCTAACCATCATCTATGAGCATTATACTATAGGTTACCTTGAATCTTTATTCATATAGAGACAGGTCGGTGACTTTGCTCCAAAAGGTCATCATTGTGTATACGATACAGATACAGCCAACAGACCAAAATCTGGTATACCAACAAGCATTCATAGAAATCTATAGCACACTCCACTATGGACAAAGGTGAACAATGTCCAATCTAATAAAGGG
>c16689.graph_c0
CTACTACTGCTATATATCAATAGTGAATCATGCTGGTGTGTTATTGCACAACTATTGTACTTATAAATTGTTGCCAATTATTCTGTTTTGTGCAGTATTGCAATTTATAACAATGAATTGATCATTTTGTTCGTATCGCGATTTGAGTTTCAAATAAGTGAGTAAATTTCCTTGTCACACATATTGGTTGTTTTATGAGAAGTATGTAAGGAACATCTATGTTATTTGATATGAATTTAATTGAAACATCGCGGAAGACTTATGATTGATGTATTGATATAGAAAAAATATAATTATGATAGAAAAATGAGTGGGTTCGCTGGCAATCGATCTAAATGCTCTTGTTACACTGTCCCAAATCTAAAAAAATATAGTACAAGACATAATCGACGCGGAAACGTAGCTGAAATATGTAGG
>c16693.graph_c0
ATGGGCTAGGTCCCAGGACAGTCGGGTGCGGATGGAAACCGTTCGAAATTTATTATTGCCATATTAACATGGGCCACCGAACCGCTCGTGCATGCACTATATATATCAAGGAACTAGTTAATGTAAGCCTTGGATGAAATTCGTAGCCGCATTTCGAATATTGTTACGTCATTCCAAGTAATGAATTGGTTAAATTACACGACAGAGATTTTACTGCAACCATTACTTAGGTATAATATATTTTATGCAGTAAATATATACATGTATTAATATGTTTTTTTTTATGTCATAGCAGGTAAACTAACAGGTGGGTCATTAT
>c16696.graph_c0
CTAAAAAAGGGATAATTACAATGGTAGAACAAGATCGTGTAGTAGCAGAAATAAATGAACTGCTTGAAGTTATTAATGCTAAAGAATTTGGTCCTGGAGAATCACCATTACGAGAATTAGCAAAGATTGGTTATATGTTACGAAATGGAGTTACCATAGATGAAATAGAAAGCTTATACGATTCCCAGCATTTCCCGTCTTTGCGTGTGCCGCAGTCACAATCAGCATTAGTACAATTGGTTGAGAGACAAGGACATGGAGCTTTAATCTCAGAAGTACTTACCGAAGAAACTGCCCAAGAAGAAGATGTCATTGCAGCAAAAGTCGGTTTTAAAGCATTCTTGAAAATGGTTGAGTTAAAACACAGCTCTGTCGAAGAAGTTATTGCTCACTTTTATCCAGAAGATTTCAAACCTCGCTCCTGGGAACAAAAAGAAGCAAATGAGGTAACTGTAGAATCGTCTATTGACCATGTAGCGTAGACACGTACGACAACAGTTATAAAAGATACTACAATACCCACAGAAGATAGCTTAAATAAAGATGTCAAAAGCAAAAAGCACACTAAACAGAAAATAGGCCAAGAAATCATTAAAATAAAAGGAG
>c16735.graph_c0
GGGGTTCATCAGATGCATATACCAATCTTAACCCACACTTGAGCACCTCGAGTCGAGATTCCTTATCTGTCACACCAAATTCAAGGAAAGCTTCGGTTGGAGTACATGTACCTGAGTGCTGGTCTTGAAGACATTTTATGCTGTTTGAGCATCTGGTATAGCAGATAAAGACATGATCTGATTCCGTCTTCTTTAGTTTGTTGCCTTTCTTGTCTAGTTTGTTGCCATGTTTGTTCCAACGCCCAACCAGTCGATCAAAGGAGATTTTGTAAGGATCCCCTTTCTTGGAATCTTTACTTGCTATGTTAAACGTGCATGTCACTGAACAAGAGTTGGTTTGTTCTTGGCAATTTGGTAAGGATCCCACAACAGCACATAAAGCTATTCCGACAAACCTATTTTCGTTCCAATGTGGGAGCAGGTTGAGCTTTAAGACGGATCCAACTGCTTCATGACAAAAC
>c16740.graph_c0
GAAATCTATAGATCTTGCACCACAACAAGATGAGGGTTCTGGTCGTTGCTGCTGCTTTTCTGGCTGTTGCCAGTGCTGCCAGTCTTTCTCTGGAGGACATGGAGTTTCACGCCTGGAAACTGAAGTTTGGAAAGAGCTACAGATCTGCAGAGGAAGAGTCACACCGTCAGCTGACCTGGCTGACCAATCGCAAACTGGTTTTGGTCCACAACATGATGGCAGATCAGGGTTTGAAATCCTACCGGCTTGGCATGACATACTTTGCTGACATGAGTAATGAGGAATACAGACAACTGGTGTTTCGTGGATGTCTGGGCTCCATGAATAACACTAAGGCCCGTGGTGGATCTACATTC
>c16743.graph_c0
GTTGTTCCAAGTGATGAGTTGTTGGAATGGCCAAAGAAAGATAAGCGCCGATTTCTTCATGTTGTGTATCGAGTTGGTGATCTTGATCGCACCATCAAGTATGCCTTTATAGAATTTGACAATTGTTTTGGTGTATAAATTATAATTGTACTGTGATTCTTGGAGTTTCCTACTTTCACTTCCAATATTGTCAGGTTTTATACGGAGTGTTTCGGGATGAAGCTTTTGCGCAAAAGGGACATTCCAGAAGAGAAATACTCCAATGCCTTTCTCGGGTTTGGCCCTGAAGAGACTAATTTTGTGGTGGAGTTAACATACAACTATGGAGTGGACAAGTATGATATTGGAACAGGTTTTGGGCATTTTG
>c16747.graph_c0
GTCGCACAATGATATTTAGAATTAGCAATATAAAGGGAGTGTTCCCAATTTTTCTTCCACTTCTCTTTCCGTTTAATATAAGCTAATAAGTTTAATATTACTTCTCCTATTTTCTTCACACATTTCTTGTAATACACATAAGGTCAATCAATCTTTGTAACTAATAAAGCAACACAAAACGAACATTTAATGTAGGTGTATGTCGTAATCGGATATTTTAAAAGGACATGTGAACATGCTAGTAAAGCCGACTGCGTTGTTGTCAATTAATATCATTAAGCGAGTCTAATGTGGCCCAATAATTACGCTAGGGATGACTGGGAACACGTGTACGTTCAACTGTATACGATAGAGCACTCGTTGCGCAAGTTTATTACATCTTAAACTGTGCGGTTTTGAATCGAAATAGTAACTCTGGT
>c1677.graph_c0
ACTCGATTGGTTGATAATAATAGGACTGTTAAATGCGGGGACTATTTTCAAGACGAAGATGGACCTAGAGAATTTGGCAACATATCTCTTACAACAAAGTGGATAAAGACTACTGACACTTCATTGATGTTACGGAATCTTGAGGTTAACTACAAGGAGACAGAGGATCAGCCCATGTCCGTTTTGCATATTCAGTATCCAGAATGGCCTGATCATGGAGTTCCCAAGGATACAGTGGCTGTCCGTGAAATTCTAAAAAGACTATATCAAGTACCACCTAGTCTCGGCCCAATCATTGTGCACTGCAGTGCAGGTATAGGAAGA
>c16786.graph_c0
CTACGTGCTGTCCAAGAGCGATTTGTTGACTCTGATAGAGTTGCACCACCAATCCGCATTATAGTTGCTGATGGAATCGAAGATGTTACTATAAAGGTCTCAGATGAAGGTGGAGGTATAGCAAGAAGCGGTCTTCCCAGAATATTCACCTATCTTTACAGCACTGCAAGAAACCCGCTTGAGGAGGATGTCGATTTAGGAATAGCTGATGTTCCCGTGACTATGGCTGGATATGGTTATGGTCTTCCAATTAGTCGCTTGTATGCTCGATATTTCGGTGGAGATTTGCAGATCATATCCATGGAAGGATATGGGACTGATGCATACTTGCACTTGTCTCGCCTTGGAGATTCGCAAGAGCCTTTACCCTGAGAACATCTCTATGTCAGGCAAAGTAAAGAAAGCTTTGACATGTATTTATGGTAGATGAGGG
>c16795.graph_c0
GTCAGCTTCTCTCCATTCTTGTCCTACACTTACCCTTGTAGGATTATCCGCAAGATTCATCAGGGTACCAACAACTATCTGGTTGTTTACTGTCATTTGCGTTTCCCCAAATCTACCAAGGCCAGCATCAATATCATTGATCATGAGAACACTCATCTTTCCTTGATTCTGAATGACTTGTGAAGCTGTTCGATAGCGGTCACGTATGAGTCTCCCCGGTTCACCAGCTCTATCAGATTCCAACTCTCCTGCAGACATTATAACTGGTTCAACTCCCATTGTTTTGAATATAAGTTCAGTCTGAAATGTTTTGCCTTGTCCTTTACCTCCCCA
>c16798.graph_c0
TGCCCGGCAACTAGTAGTCCGTCCTATCTATCTACCTCTCCAAACACAATATCTTGAGTACCAATTATGGTGACCACATCTGCTAGCATGTGATGTTTGGACATAAAATCGAGTCCTTGTAAATGAGCAAAGCCAGGTGCTCTTATTCTACAACGATAGGGACGATTGCTTCCATTACTGACCAGAAACACACCAAATTCTCCTTTAGGTGCTTCAACTGCGGTATAGGTAGAAGAAGCTGGTACAGAAAAACCTTCTGTATAGAGTTCAAAATGGTGAATTGAGGTAGAGTAGACTAATGATCCCGTAGTAATTCAGGCAGGCCGTTCTTTAGACAAGCTTGCTCCTGCTCCCTATTTGGTAGG
>c1682.graph_c0
CATCCTGCGTGCCGTGGCTGGCGCCGGTGTGCTGGCGGGCTACGACCAGCTGCAGGTCATCCTGCTGGGCAAGAAGTACGGCAGCGGCGAGGCCTAAAGCGGCCATTGCATGCCTGGAGCTATTGCTAAGAGGCGGCGGTCGGATGAGGGGTACAACAGCTTCGCAACCTGGGTTTGCTCTCCTAATTCTTTACCATATGCAGTGCGAGTGAGTGTTAATTACCGTGGAACCGTGGACACTGACATGGCTGCGGACCAGCAGTGACAACGGAGGCTTGTGTGCGTGTGTGGCATGTGGTGATGGTAGCGATAACGTGCACTCGATGAATGCTATCAACCTCCCAAAGACACCCATAGCATGGGTCTGTGGTTGGTGCATTCCGGGTTTAGGGTAGATTGATTACGGAACCATCGGAAGATTGGCATATGAAAGCCGAATGCGGATGAGGCGGAGCATGGACCGGATGTTTCGGACGTTCTGTAACACAGACGCGGG
>c1682.graph_c1
TACGCCCGTACCCGTCTGGCCAACGACGCGAAGTCGGCCAAGAAGGGTGGCGGAGACCGCCAGTTCAACGGCCTGGTGGACGTGTACCGCAAGACCATCGCCTCCGACGGCATTGCGGGCCTGTACCGCGGCTTCAACATCTCGTGCGTGGGCATTGTTGTGTACCGCGGCCTGTACTTCGGCATGTACGACTCGCTGAAGCCCGTGGTGCTGGTCGGCCCCCTGGCCAACAACTTCCTGGCGGCTTTCCTGCTGGGCTGGGGCATCACCATCGGCGCCGGCCTGGCGTCCTACCCCATCGACACCATTCGTCGTCGCATGATGATGACCTCGGGCTCCGCTGTCAAGTACAACAGCTCGTTCCACTGCTTCCAGGAGATCGTGAAGAACGAGGGCATGAAGTCGCTCTTCAAGGGCGCGGGCGCCAACATCCTGCG
>c16821.graph_c0
GAGTAGAGTAGAATTAGGGTGGTGACAAACCTTTTTAATAAAAAAACAATATTTACATGCTTTCATACAATAAACCATTTTCAATTCATAACAGTACACTAAATAAAGTTGTGGTTTTTATTATGTTCTTGTTGTCATAGAATTATTGTGTATTGTGAAATGTGTCTATATTATTATATCTACTACATAAAAACCCCTTTGCTTATGTGGCTCAAAGCTTATATCTTTTATATTGATTGTTGTTTGTCATCACAAAAATTGGACTATTACAATGTCAAAAGACAGTTCCAAAAAAACATATGAATTTGACAGATTCAAGTGATCAAGGTACTTTAGATAACATAATTGTAAACATTTTTTACTGACAGCCAAGTCGCCAATAGGAAATGCTACATTCTATTTTTACATCATTGCATAACAGTTAATTACTTTAAATTGCAACCGGCAACAAATATTAC
>c16845.graph_c0
AATTCATATTACAAGAAGGCATGGAGATCTGAGATCTATCAATTGAATAATCAATTTTTATACATATAAAAATCGGTTATTTTAATAATATTAAACTTGGATTTGATCTGACACTATAAAATTGTGACTCAATTTTTTCTAGTTAGATAAGAATAAAACCATACAATAATTAATAATGAAGTGAAGAAGTACAAAAAAAATATGATCGATTTAAATTATAAAAGGATTGACATGTTTTCCTCCAATGATATAACTATATAGATACAACATAAACGCTTGGACATTGTCTTGTTAAAACTTGGCTATATGGGCTTG
>c16854.graph_c0
GTCTTCTTATGATTTCATGTGATTATTAACAAGGTTATTTACACCTTCAAGGCGAATTTAAAATATTCAAGGTCTAGTTAATATGATATAATTTAAGGGCAAAATTCCACTACGTTCCTAAGGATTACATTGTGATGTTAGGTACTAAACTTATTGAGCCTTCGTCACTATAATTGGTAGACTATAAAATGAAAGAAGGTTTTACCTAATCTGATATATCCAGAGACTAATCTGTTTAAATGTTTATCTAGTCCCCGTTAAACTGCTACTGAATCCTAACTAGTATTGTAAATACGAATAAGCGTGTGTTTGTCTGTCTGTGATGATTTCACGCCTTAACTACTTAAATAATTATCGTTAATTTTAGTATACACCTAGACAGTGGCAAAGAAAAAGACATAAAGTACTCTTCATAAAAAAATGTACTGTTCCCGAG
>c16855.graph_c0
GTGGGCTTCCTGTATGGCACGTCATTTCTGTGTCTTTTAATCAAGTCATAATCCAAATTTTTCCCAACACCTTCACTATATTATCAACCCGTGTCATTAGTGGTCTATCTCTTCTATGACACTTTTACTCTATCTGTTATAACTGGCCGGCACACTTCAAATTCCCTTGAACTACGGCTTAGCAATTTTGCTAAGTTTTGTGTGTCTCCGTATTCCGGATCCTGTCCTTGTGTACGGGCTGCTTTCCTTGAAATTTTATTTGAGACTTTGATGATTCACGTCTATACACACGCGGTCTGTGCCGGTAC
>c16862.graph_c0
GGCTTTTGTGGCTTCTTACCAGCGTTCATTAGAAGTTTCTGGATGGTGGAAAAAGGAGCATCAATGCAAATACAAAGTATAAACGCAGCAACGATAGACAAAGATATATCACCCATGAACCTGTAAAGAGCTTCACCATTGGAGAAATAATGTGTTTTAACCCAACTTCCATTGGCTGTAAAAATTATAGGAAGATGAATCAAGTACATGGCATAAGAGAGACGAGCAGGTAGCTTCCAAACCCTCAGTGAAAGGAACCAATTTATTGGACCGCCGTAACCCTGGACACAGGCGAATATCAACCAACCCAAAGCGCAGGCCCATATCGCTCTCATGTACGAGTTCAAAAAGTTATCAAACATTTGACCAGTATGATCTGGCTGCATTACTGGATACATGGAGAATACACAGAAACTCAACAAGATAAAGCATATGACCCAGAGCACAGTAACGTTGAGCCTTGTCATGCG
>c16892.graph_c0
GGAAAACATTTTGAGGGTATCCAAAAGTATTCAAATAAAATTGCCAATAATTACCATGTCCAAAAGACAAAAGGTTTATTACAAGGGCATTTCCTCGTTCATTTTTTTGTTATATCAATCTGTATCTAATATATTACCATGCTATGTGACTTTGGGTAGACAGTAATAGTGCAAGACGGCATTTCTCTATCCTAGAAGATTTGTTTCGTGTTTGTTACACACTTAATGCATAACTATCCACTCCGTGTGCTTCATGTCCTATGGTCAGACCTTTTTTTATATGATTACACACCAACCGATCTCAGCCTACTCTGGCTTCTATTTCCTCTTTTGTCACAAATAATTCACATATTCCATATGCTCGTATCGAGAACTTTCTAGACTATTTCACTAGTTTCATAACAAATAATAAAATATGAATATAAACCATCATAAAAACCCCATCTTTCGAGGGAAACCCTACAAACAATATCGCTCAAGCATTCAGCGCTTCAATTATGAAACTAGGATTTATAATTTCATCATAAACGTTTTTCCAACCGA
>c16897.graph_c0
AGTGCAATGAAATAGTTTAATGGGAACTAAATATAATTAACGCAATATCGTGAACATCTTAGCTCCACAGTTTATTCCGAAGAAGTATGTTTGTTTGTTTGTATAATATTATCTCCAGAATTACCGAGACCATGTTGAAAATGATTTTACTGATAGAAACCTACATTCTTCCGGGTTGACATTTAATTACGATTTATTGTAATTACTACGAAGGGAATCGCAGCTCACAAATATATCGGTAATTTACACATAAGATCCGCGATCAATGATTAAATTGCGTATATCTTTATTTAATTAATTCTCATTACTAATTCTACACACGATTATTCCGTTGTTGAAGTATTTAAAACACGTAAGTAAACATAGAAATAAATTGAG
>c169.graph_c0
ATGTAAGAAACAGGATTGGTTTGATGAGAATGATAGAATTTTGACAAAGGCAATCGATAAACACCGGTGTTTTCTTCGGTAATATAACACTAGCTATCGATGTGAAAGAGTTAAGATGATTAGAGAAAGTAACCTGGAATTGAGGAGACTAACACGAGAGACAAAAGATCGATGGTGGCAGCATAGAGCTCGGCATATGCAGTGGCTGGCAGACACCAACCAGCTAAGTAAATTTTATGGTGAGGTTCGAAGATTAACTGGTAGATACTCTCTTGTAAAAGTACCTATGAAATCTGTAAGAGATGTAAGGCTTCTCAAAACATAAGAAGAAGTGCTGCTGGGCAGAGCATTTCAACTCCTTGCTTAATGTAGATCATTTCGTTGATCTGGAATATGTGCGTTGGACACCTCAATTTCCTACTGCTATTGAGCTTAAGTATGACGATGTGGAACTGCATTCATGCATATGGGAATCA
>c16905.graph_c0
CACGGAACAAACTTTTTACAATACTTCATAAAATAATTGGCATCTGTAAGATAAAATTGCTGTATACATATGTTATGAGTTTAGCACATATTTATCCAATTAACTAGTTACTTTTGTCATGATATATAAAATGGCATAAATTATAGTGAGCAAGATTTATGAAATTTTATAGTATAAAGTTTGGAGCAGGTGCTTATGGTTATCAAAAAACCATCACCTATTTAAAAACCTTACCTCTAATCAGACAAAAAAGTAATTACCTTATCCAGTATATTTATTTATTTGTAAGTGGATATTTTTATCAGAGAGTATACTTGATTGACTTTTATGATTGTTTTACCAGTACAAAATATAATAAAGAAAGAGTAATGAAAAAAGTAATAT
>c16912.graph_c0
GATAATAATTAATCATCGAACTAGACAAGATATACGGTACTGACAAGTGCTCAGCGTGTTATGCACAACTATAAATTGCCGCAACTTCATTTTACGTTCGTTTTTTACCTGGCAATGAGAGTGGGTTATCTTTTGGTGATTAAAACCTGTTTGCTACCTCTGTAAAATTTTCGTAGTTTTGTGTCTAGTATGAATCAATTATTTTTAATATAATAATTCTATAGGTTATATCAATTTATTATACAAATAAAGAATAGCTGGATGATCCCCCGACTACTTAACAGATGAATATCATAGAAAAAATTTTAGTGAAAATATTTTTGTAGGT
>c16925.graph_c0
ACCGCCTCGCTTGATAATATATATTGCTATATTATCAAATAGCTGATATGCACTGGACGATCCCAGAATGCGACATGCGTTATTACTCGTTACTAATCGTTAAAGTTTTTTTTTTAATCCCCCGAAAAAGTTTCTTTTTAATGAAAAATTATGAGGAAGAAAAGAAATGTCTTTTTCTGTTAAAACAACAGGTACCACAGTATGATTTATGCTCATTTCTTGTTAAAATGATGTTTTGCGAAAGTAACTCTTTAAATATACAATTATTATGACCTTCGAGATGTTATCCATTTTTTACGAAAG
>c16932.graph_c0
TCAAAGGTATTATATTGTAAATTACATCACAGGCAGTGTCTAGTATTTAATAAAAACAAAACAATTTATGTTATGCTTTCGGTGTAAGTGTTATTACTTATTCATATCGCTCATATATATATTCATTGTAATATTATGCTGGTGTTATCAATATTCCAGGTTAAATGATCAACTAATCGTCTTATCTGCGTTGGTACCAACTTTCCAATCCTTAAGGATTTTATTTCCACAAGCCTTTTATATAAATGTTCGGTTTAACGTCAATGAGTGAGTAGCGTTCTCCCGTTCCAACTTGATGCTTTGTGTTGAATCCTTTGCTTTATAATAACATTATTCAGTTTTGTAGGTTGCTATTGATTGCACCATATAGCACAATCACGTTTTAACTGAAAAGAAACATTGTTGTAAGATCGTATGCTATGTCGAAGA
>c16933.graph_c0
GTGTGAGTTATGATGTCATTTGTTTCAATATCATGTGGGTAATTATCTACCTACACCCTTATAGTTATAATATCATTGAATTCACTAGTTGATGTCAATATTACACTCTGCAGAATGTGAGTTTTTTTTAATAAACTGATTACTATTTCCTCACAATTGAAAATGACTATAATAAAATCTAAATTTCACTCCCATGTGATATCAGTCTCTAATAGTTTCAATGAAATTCAATTTTTATTAGTTTGCTTTAGAAAAAATTATGGCCATTTATACATTTAAACCCAAACACATTAGATATTTACATA
>c16937.graph_c0
GCCATTTACAGAAATTCTAAGTGAGTTATTTCCCTATAAAGAAGAATTTTTGAATAGAATACGATACATACAAGGGAGTTATGACGATCTTAGTGATATAAAGCATCTTATTACATCTGAAACTTCTTTATACTTGTCAGTACCTCCGACTGTTTACAAAACAATTTTGGAGCAGTTGAAATCTTTAGAATACAAAAATGTGCTCATTGAAAAGCCATTCGGAAATGAATTCGAAGATTTTAAAAAGTTTAAAGAACATGATGTGAGTAAAATGTTATTTATTGATCATTTTCTTCTTAAACCAATGTTTGTGGCTTGGCCTATCATAGTCGGAAGAGATAAGAAACTAAGGAACGTACTTGACAATAAACACGTTAGTTCAGTCGAAA
>c16937.graph_c1
ATTCTATTTAAAGAAGTAATAGGCGGTGAAGGACGCGTTTACTTTGATGAACATGGTCTTCTTAAGGATATTGTACAAAATCATCTTTCTGAATTAATGGTCATATCTGCGGAAGAATCAAATGAATATTCTTGTAATCTCCAGGCCGAAGAGCGAATCGAAGTGCTCAAGTCAGTCAGAATTATTGAAGATTTTTCAATATTTGGACAGTACGACTCGTATCAAGCTGAAATGAAAAAACCATCTTCTACAGAAACATATTCTGTTGTCACATTGGAACTTTCAAATGAACGCTGGTATGGTGTTCCGTTTATTACGATTGCAG
>c16944.graph_c0
GATCGATTCGTTTTTCTTTTTCTGTTTGTCGAATTTACTTGAGGGGAACAAACTTGGAAGAGTGAGTGGCACCAATACCGGGACGACGGTGCTTGACAGGCTTGTAAGAGATGGAGAACTCAGCGAGGTAGTGACCAGTCATCTCGGGCTTGATTTCAACTTGGTTGAAGACCTTACCGTTGTAGACACCAATGACGGAACCGATCATCTCAGGGACAATAATCATGTTACGGAGATGGGTCTTGACAACCTCAGGCTTCTCGCCAGCGGCAGCGTTCTTCTTGGCAGCACGGAGCTTCTTGATGAG
>c16945.graph_c0
GTATAATGCCACCAACGATTGTAAATAAAGACACGGAGAGATAACTTCTGCTTATCATGCCAGGGAATGAAAAATGTTACTTATAAAGGAGATATACATAATATATTCGCCCAGACGTGGGACTGTAAAGAGGCTATTTCAAAATAAATGATTACATATAAAGAGATACATAATTATTTGAATGTATAAAGAACAGTGTTCGATTTACCAGTAGGCTGAGTAGACTGAAGACTAGGGTGGCAAATATGAGGCTTAATTTTTTTGGCTTACAGAAATTGTAAAGTAGAGTAAAGATCGATCATGGACACCGAGTATAG
>c16950.graph_c0
GTTGGTTTCGGCTTCACGTTGATTCTTATGGTTTCACCTTCCTTCAATCTGTGATTAACGGCAGGATGGATATCAATATGATTATCGCTCTCACTCGTTTCCCCTGTCTCCTTCTCTTTCTCCCTCCTAACGTACTTTTCATGATCCGATAACGCAACATTGAAATCAAACGCTTCGTTCCTCTCAGCGAATCCTAGCCCGATAAACGCATACTTCCCTCTCCCGTCATCGATCCTGAGAACGAAATACCTAGACGAATCGAGAGACGGCTCTACAGAGTTCTCTCTACGTCCAGGATCCACAAAACAAGCTGCGAAAAGATCACCGGAATTCGAATCCTCGAGGCGGATCTCGCATCGATCCT
>c16956.graph_c0
CGATAGTCACTGCGATCCAACAGACAATAATGTTCTATGGATTTCAACGTTTCTCTCTCTATCCCTTCCCTTTTTGTATATATTTCGAGGATGGGGATATAGAAAAGCGTTCTATCTCATTCTTTCACAGCTTAAAACCTACATATAAACATATAGCTATCTCTTCCTCGTTACACATTCTCGTTTCAAATCCAGTTCACAGCGTCCCAAAAGAAGTTTGACTTTAAAAATGGTTTTTCCGATGGATAGGTCAAACTTACAGTAATGAGAGCGTACAGAAAAGCTAATTTATAATTACTGTAATGATTTCTTTCAAAATATTGGTAATTG
>c16964.graph_c0
AAAAGGTATTGGAAGTCTATGTTTAATTTTGTCAAAGAAACATAAAATTAGAATTTGCTTAACCGCAAACGTAACGGTACTGGTTTGCAAAGTAAAATTAAAAAGAGAATAATTTGAAAGATATGGAAGTACAAGTTATTGACAACATAATGCACAAATATAAATAGTATGTTAAAAGAGAAAAAAAGTAATTCTTGATTTCTCTCAGTGTGTAAAGAATATTTTGCGGTTTATTTGTAACTAGCTTTTGCTTGCGTTAATGTAAATTTAGGCTTTTCTTTTTTTATATATATCATAGGAGG
>c16980.graph_c0
GCATACTAATATGAAACAGATCTGAGACAGACGTTACAGATTTTTAATTAAAGCATTTAACCATTGGTTTTTTTGGCTAAAGTCGACACAAACATAATTTTTTGTGTACAAAAAAACGAAGTATAAAAATGTTTTAATATTTTGTATTCATCACACCAAAAGTTTTTCTTATTAAACTACTTAAGATGTTTTTTGTTTGTTAACATCTTAAGCTATTGTTACGAGACATAGAATAAACTATACGACAAAGTATACAGCCTAAAGAAACAAGGCCTGCAGCATAAATATAAGTCTTTTTACAATTTCCTTGTTCGGCAGATGCTTTTCATGAT
>c16993.graph_c0
GTCTCAAGTTGATTTAATGTAGAAAAAGCAGAGAAAATGAAATGAAATATTGAAGGTAAACCAAAAATATAGGAAATTGAGAAATGCAAGAGTAGGAAACATAGATGAAATACTTTGAAGTAATGGTGGTTTCGTATAAAATGAACGAGAAATGAAAAATATACCGATTATTTTGATTATTGTTGATATTAAACTATAGCTGAATGATGTTAACTATATTACGGAGACCACATAATTGTTTACTATTTCCTTTTCATGGTTATGGATTTTGTATTTTTAATATTATGGTTGCCTTGATCGTAGAAATGTAACGGCCAATTTAGTCTTAATTATTTTAGTTACTCATAATAGTAATTTATGAGCTATATTGTAACATTTAAAATAACTATAATAGTAACATTCTGATTACGAAATATCTGAA
>c16994.graph_c0
GATTGTTTGGCTTGATCCTGTGTGTGAGAGAGAGATTGAGTAAAGGAGCGCATGTGATTTCTTCCTTTTTTATTTTAGTTCATACAAAATGTCACTTCTATTTCACTACATATACAGCCCTGAAGTTTGTTGTTAACACAGTACACGCCGTCTACTCAGTGCTCGTAAAACATCCTGCGGACATCAACATCACCTGTGCCAAAGTTTAGGGTTCAAGTCACAAGACAACACTTACACATGTACTGAAGACAGTCGAGTTGTCAAAAATATTCAATCGTAATGAAAGATGATACATCTGAATGTGTGTATATATACATTACATAC
>c17.graph_c0
GCTCGATCAATTATTTCCTGTGAATTAGGAACGGAATGTGATCAGATATTATTTTCCTTATCTAAACTTAAAAACCTTATCTAAACATAATTACTCCATTGTGTGGTTGTCTGTATGTTTGTTAGAAATGATTTACTAACAAGTGAACATTGGGCTGTACCAATTTTAAAACTTATGTATGATCGACCTATCCATTATAAAAACACACGCTTTTCTGCACGAATGTCGTTATCTGTACCCCTGCCAATGTGTATGGAAAATTTTATTATGAACTGTTGAATAAGTAGTTAATACGTAAAAGTGTAACAAAGTCACTGGCGCATTTAAAATATTATTAAAAATAAA
>c17013.graph_c0
GAGGTAAAAGAAATAAACAGGTTTGAAAAGTTACAAACCATTTATGAACTTAATAAAAAGTTCGTAACAAAACTCGCCTTTGGTCGAGGAGTGAAACGAGTTCTTTTTTTACAAAACTATAAATTTGTTGTTTATGGTTAGAGTTTGTAGCCCTCATAGTTAAAATTACACAGTTACCTCTTAAAGTTGTTAATCCTATCAATAATATGAAAAAATATAGTAATAATATATGTGGATTAAACAGGTGAAGTAAAAATAAGATTTTATAAATATTTCAGATAGACCTTTTACTTACAATTTTCATCTGTATTATATCTATATTATTATGATAATAATTAACAAGTGTTTATCAGAATCAAATAAAACATAAAATAAAGAAAGACTTCCTCTTCTTTTCATAATTATTGATCTTCATATAATAAATAAAGTCCAAAGGCAAGGTTGATTATTATCAT
>c1702.graph_c1
ACTCAATAATATTTCGGTTCCTATCCAAGACTTACAAAAAGCGTTAGAACAAATCGAAACGCTTTCGATCAGGGAAGCAGAAATGACATTAAAAAAATACAATACACAAATAATAGAATCTGTGATGGAACCAATCTTGAAATTGAGAGGTTCATTTGAATTATTGTCAAGAGAAACAAATGTTGACAATGAGGATACTTTGAAAAATACAATTGTAACAATAAAACAGAGCCTTGATGAGATTTCTTCACAAATATCATCAATAGAAAATAATATTGGAATGTTTAATATATTAGAGAATGACAATAAATTAGAGGTGCTACAAAA
>c17025.graph_c0
CCCTAACCTCAAATTATTATAGTTTCAATGAAAGAAATTATGATTATCAGGTCACTCGCCAGCCGCTGCCTTCGCAGATGTCAGACTCTGAAGATTCGGAAGGTCTGGACGTTCTCGGTGTAGTTGGTTTGCCACGAGAGGTAGCTCGACTCCGCTTAAGGCCGACGCGATCTTCCTCCATCCTGCACTCTGTGGAAGATTTGTCCACCGACAGCACTTGCGTCTATAAAGCTAGTCGAAGGAAGATTAGCCGTTCCCTATACATACGGCCGCCACTGTCCAGTCGACTTATCCAAAGCAAGCTGTTAGAACCGGTTGTAGTCAAGCAGGAGCAAGAAGTTAAGACAGAAG
>c17027.graph_c0
GTTCCATCAAATTCAGAAACAGCAGGTATCAGTGAAACTGGAGCAAGCATTTTGAAGACTTCAACGTATTGGATGGAATTTTTCAAAAATTTCACCATATGTTTTCTTATCTTCTTCAGGAAAATCCTCTGGATGTAATTTCATATATCCAAACATTTCACGGTCCCTCACAGCATACAGGTAGTCTTCACGTTTTACAAGATAATATCCAGCAAAAAAAAAGGCCGTAATATATAGAAGCTGGCGATGCAAACCAGCCGTCGCGATCGGCCTCCGCCGGATCAGGTTATCAATCAGGCCGGAGCAGTAGCCCAAGAAGCCGATGTAGAGG
>c17033.graph_c0
GCACATGTTTATTACACAATCATTATTTTTGTGTAATTATATTTTTACTCACATATATTAAAGTATAACTGACGATTAATATAATCTATCAATTTTGGTAACAAATATACTTACTGTATATAAAAAGTATAACCAAAATTGCATGAATTTTTACTGTTTACAATTCTTGTAGCCTATGAATTTTATTACTAGTGGTACATTGCCGCTTTGTTCTAATGGCAATAGTTCTCTATTTCATAAGTTTTTATTTTATTTATTAACTATAATTAAATTAATACTATTTAACCCCCACAAATGTTTAAT
>c17034.graph_c0
ATGGGAATTACTCTCTTTTGCCTATCACGACTTAGTACCTATATGTTTAGTAAATGTACATAATAGTTCGAAAAAAAAATTCAATATGCGACGTTCCAAAGCCATCGTGTTGTATTTTTATAGTAACCTGTAATAATGAAGCATTCAAGCCTCCATAGAAAGCGAGGATACCACCAGATTGATACACCTCTTTGGCACCACTGACGAGACTTCTGTATTGGTCTTTAACCAGTATTTGTCGTACCCTAATCACTTCCAATGGTAACACGAGGGTCGCGCTGCAACAACCGGCAAATATCCCGCATAGAAACAATAGCACTGGTCTGAAAAGCGA
>c17035.graph_c0
GATTCGATACATATTACTCTAAGAGAATATAATTTAATTTGTGATTATTGGCTTTGGTTCTAAAGTTAAATTTTGATTCCGTTGTACACAAATACAGTTAGTTTTCTAAGTTTTTACATGTTACCTCATGTTAAATAATGATTAAATCTAAGGTAAAGACGTTAAAACCTAGAGGAAGATTGGTTTCAAGTGCCTCTTGTCGAATACACCTATAGGTGGCAGTTGACAGACTTTCAACAATCTCGATACAAATCTCAGGTTTAAAAATTGCATGAAAACTAATAGCCCGAATAGAGGTTCGGATACTTTGTCTTGGGCTCTTAAACCAGTTGACAATCGCTTAGATGCCATAATCGTTCGCCCCAAAACCTGGTTAAGTTATAGAAGCCAGACAGGCGAATAACGTTAGTTAAAAAAATCAACTTGAGAATGGTAGCCAGCCAGTTCACCTTAGAAATAATCTTAGGCACCACCGTGAATCATTTTATCATGCTTCTTTCTTTCACCGAATCCCTTGGTCATTAAAGGGATTCGAATCTATGGTACCAAGACGAAGCCTTTATTGCTCAAATTTACGAAAAAAAAT
>c17036.graph_c0
GCCGGGTATTGATGGTAATTTTTTTTTTTATCTTTAGGCATAGACACTGAATGTGAGTCTTAAAAACTCAAATACAATGTCAAATAAAATTTCATTCCTCATTTAAGGATTTTAAGTTTCTCTAGAAGAAATTGACTTTACAGATATTCTCGCGACTCATGTTCTAATGTTATTATTTTGCTTTTATTTACTATCTCCATAGAATAGCTGAACAGATTCTGCTGGTAAAAACACTACAAGCTCCCGATTCGCGACGGACCATTTGAGCACCCCTGCTCTATTACCAATTCATACTTGAGTTTCAACACTCATATAACTTTAGACTAGGCCCCCCTCGGCTGAGACAAG
>c17087.graph_c0
GATATACTCAACCTGCTCAATGAACCCAGTGGAGGATGAAGCTGTTGTTGCTGAGATTCTAAGGAGGTGTGGAGACTCTGTTGAACTTTTAGATGTTTCCGATAAGCTTCCTGAACTTATACGAAGACCAGGACTTAAGGCATGGAAGGTGCGTGATAAAGGTGGGTGGTTTACTTCTTACAAAGATGTTCCACAAAACCGGAGAGGTGGAGTTCTTGTGAGCATGTTTCCTTCTGGGAAATACCTCAAGGACTCAACTGAAACCACGGAAAAGAACGAGAATGGTGATGTTAATGGCTGTGAGGATGGACTCAAAGAAACAGATATTTCTGTGGTGGATGCTACTCCTGAAGAACAAGCTGAGGAAGTCTCTGATCTTCCACTTGAACGTTGCATGAGGATAATACCTCATGATCAGAACACCGGAGCCTTCTTCATTGCGGTCCTTCAAAAAAAATCTCCCTTACCAGAATTTCAGGAGAAACCAAATACGAAAAGGAAC
>c17090.graph_c0
GAGCCTTTTAATACAGCCGGGAACGCGACATCCGTTTCGACCGAAGCTGACGTCATAGCTGTAGAATCAGTGACTTTAGCGGAAGTTGATACTGGAGAAGTCACAGATGTCGGTGTTATATGTGCAGTCACGTCAGACAACGATACTAATGGTATATAAAAACACTCATAATATTGTATAATGTATATTTATTTAAATGGAACAAATAAAATTGAATATTTGGCACGTCAGTTACAAAATTTGTGTTTTACATGGAAGCAGAGTTTACGGACAAACGGACGAGAATTACAGATCCAAAATAGCATGTTTATATTTATATTTCGTGTGT
>c17094.graph_c0
GGTTTCTAGCAACAGAAATAGAGTATCGCCATACCCGCTTCGCTCTTGCAGGAACAAGAAACAAAAAGAAGTCGAGGCGTCGTCGTCACCTGTTGAGTTAGAGAGTGTTAGTGAATGGGAGGATGTGAGGTGTGTGATTTGTATGGAGCCTCCTCACAATGCTGTCCTCTTGCAATGCTCTTCTTTCTCCAAAGGATGTCGTGCTTACATGTGTGATACAAGCGCTCGTCACTCCAATTGTTTCAAGCAGTACCGCAGAAGCAACAGCTCAAGCCGTTGTAGTGGCAAGACTCTACATTGTCCCTACTGCAGAGGAGAGGTTCAGGG
>c17099.graph_c0
GACGTAGCTAGCTCTGGCAGGAACGAGCAATCTCAAGGATCAGAGCAAAGAGCAAGTACAGTAATGGACAAAGTTCAGATGGAAAGCATCAGACGAGAACTCCAAGAAACATCTCAGCGTTTAGAGACAGTGAAGGCTGAAAAAGCCAAGATCGAGTCTGAGGCATCAAGTAACAAGAACATGGCTGCAAAACTTGAGTTCGACCTAAAAAGCTTATCGGATGCATACAACAGTCTAGAACAGGCGAATTACCATCTTGAGCAGGAAGTGAAATCCTTGAAAGGAGGAGAGAGTCCCATGCAGTTTCCTGATATAGAAGCCATCAAGGAAGAAGTGAGAAAAGAAGCTCAGAAAGAGAGCGAAGACGAGTTAAATGACTTGTTAGTATGTTTGGGACAAGAGGAAAGCAAAGTCGAGAAACTAAGCGCGAAGCTGATAGAATTAGGAGTTGATGTTGATAAGCTTTTAGAGGATATTGGAG
>c171.graph_c1
GTACAGTCATTTTGACGAGATACAATAAAAAAAAATGTTTGTTACATCAGTTGATTGCAATTTCTTGTGATACAAAAATTAAATCTAGGCATTATTTATTGTTATCGTACCGTACCATGCCTTTACTGGGGCAGGTAACAAAATGGAACGCTATTATTTCCAACTTTCTACCCTTGTAAGCCTGAATCAATTAATTAATCAAAATAAACATTTGAGTCTATACTATAGCAAGTTTTTTTAAACAATATTATCTAACCTCACTAAACATCAATCACTGTTGGAGCAAAACTTGAATTGGGTGTTGTAAATATGCTTTAGGTAATATGGACTCTCAAATGGCAATCCATCTTTTATTGTTTATCTACGTATGGAGCCCCGAGTAAAAGGGCCCCTTAGTTGCTACTCCTTTTTACTTGCTGCTTTTGTTATATGAAATATTAGA
>c17106.graph_c0
ATCAAATGGCCATCTAGATGGGATGCGTACTTGAAGATGGAGGGTTCGAAGGTTCATTGGTTCTCAATCTTGAACTCTCTTATGGTAATCACTTTCTTGGCTGGTATTGTTCTGGTGATATTCTTGAGAACTGTTAGGCGGGATTTGACTCGTTATGAGGAGCTTGACAAGGAGGCTCAAGCTCAGATGAACGAAGAGTTGTCTGGATGGAAGCTTGTTGTGGGTGATGTTTTCCGTGCTCCATCAAATGCCTCGCTATTGTGTGTCATGGTTGGTGACGGAGTTCAGATTCTTGGCATGGCTGTTGTTACCATTTTGTTTGCTGCTCTAGGGTTCATGTCACCGGCTTCACGTGGAACACTTATTACTGGTATGCTCTTCTTCTACATGATTCTTGGCATTGCAGCTGGTTATGTTTCTGTTCGTCTTTGGAGGACA
>c17107.graph_c0
TAATAGAGTAATTAATATAGCTGATAATTCTTTGAACTTTATACATTTAACATTGATCGACAAAATTTCATCATCAACATCAGCTAATCCAAGAGATGCAACATTGTAAACTATTCTAGCATTTGAATTAGTTACATTGCGACACATGTGGAATATTTTAGTTAAAAATCGTTTGTGAGTGTATAGGTGAGTGAGTTTGTGAGTAGGTTTTATGCATAGATGAGAGAAAGATTCAGATAAAACCATTGACTATAAAAACCCACCCGCAAAAACTTCCCAATATACAGACGTGGATATAGTTATGCGATAAAGTCATGATTTTGCAAATTCAACTTTGCCTGAATGATTTAAAGTTGATTTTAAAAAGGACGAAAGCGACACGAGGATATTTGAAATGAGTGCCTAATTTTCAATAGTGTGCATATATTATACGGAGGGTTTTGAGTGTGCATCTTGGGTTTTGGTATCATAAATCCATAAAACTATTGTATTTGAAGTAAAAGAGAAG
>c17118.graph_c0
GATCAATACAATAATTCCTCTCGTTTTGTACACGTGTTGTTAGTTATTATATATTATACAAGAAACTTAATACAATCATGTATTATTGTTCGAAGGAATGCGTTAGAAGTATTGACATTGCGATACTCAAAAATGTGTTCTGTACTTTTTCGACAAAGACTGACATCGTAACCATTGTTTTCGTTTTTTCCAATGAAGTCTTTCTCGCGAAGATCTTCTTACTATAGATATGGACGTATGAAATAAGGTGTTTCGGTATGTTTGTTAAAATTACAGAAATGTGACAAGTACATTTACCGAAACTCGCTGATATATTTTTTAAAATTCAAATACCAGTAATATATGTTTTAATACTTGAATCAGAAGTGTGACCTTATAAC
>c17127.graph_c0
AGACAAATAAAAAATTTACCTAACAAATAATGTATTAGAATTAAGGAAGCAAAAAATTATGGCTAAATTTGAATTAAAAGAGATAAATGAAAAAAATATTAAAGTAAAAAATGTCTCGGATTTGTGTCTGAGGATACGGGGACGTAAAAAAAAAAACCCTCCACCACTGCATACTGCACTGACTAAGACAAACGCGGCGGCGGCGGACATCGGTAATACACCATCCGGCTCGACACCCAGAAAGCAAACGTCAACGACCTCGCCAATACCAGGCGAGGCGACAGTAATATCGGTGACGTCCACTACACATGGCTGAGCCTCAAAAATCCACCTG
>c1713.graph_c1
TATGATCTGTGTGTAGATCACTACATTTGGGCGAACACCAAATTTTCTCATCTGATTCAAGATTTGCTCCGCTTTTTCGGGCTCCCCAGCTCGAGCATACCCTTTGGCAAGGATACTAAATGCATGAATATCAGGATCTATTCCTCCTTCCAACATATCTGTATAGATCTCTTCGCATCTTTTCATATCTCCTACAGAACTCCATGCATTCATTAGAGTGCTAAACGTTACCACATCAGGTTTTACTCCAAATTCTTCCATCAGATCCACCACCTCACCAACTCCATCCATGTCGTTGATGTTAAGGAAGCCTTTGATTAGAGAGTTAAAAACAAA
>c17160.graph_c0
CGTCGCCGTGATAAGTCGAGTTCATCGGTCCATAGTTGATCGATTAGGGTTGGTATGTGAATAAATTGGAGCCCTTCTCGTAGCAATGCAGACGACAGTGTTTGCCATTCGCCGACCGATGTGAGTCGGGCATCGCCGCCCACGCGACCGTTACGACCTAAACGTTCTGTTATCCACTCCGTGATGGTGGGTTGGCTAGGTTCGTCAGCGTCGAGGACGAGCCACGCACACGTGAGAATGGACCGCGCGCGGGTGACGTCACCGCTTGGTACCCACACCGCAGCGCCGCCATCTGCTAACACAACGGCCGTACCAACGCCATCCCAACCGCTTATGTACTCTAATCGACGTTCTTCAGCTGATGGTTCTTCGTTCAAATGTTCATCGCTGAAG
>c17163.graph_c0
GCGTATTTTGACAAAGATATTTACTCTTATTATAATTTACCATTATTAGTTTGTTGGTGCTGTATATCACTGTAGTGAATTAAAAGCAGTGTTTCTGTAATTGATTCACTGTCGAATCTATTAACTATGTAATCTACGAACATAACAGAAAGACCGTAATAATAATATAGAAACTTTCAAATTGAACTGTTTAGTCACATTTACACATTACTTGGGGTTGCATTAGAAATTCGCATCTTGAAATAAGGGTTGGCGCGGATGGGATTGGTGCTGGAGGTGACTACCCTTCTACATCACCCCAGACATCATCCTCCCATTTAAAACACATATACACTTGCACAAGGAATTTGATGTGTCGG
>c17187.graph_c0
GGCGGGAGCGTTGACCTACGCAAACTTAGTATGATTTGCAGTGTTGTGCAGTACAGTTTGCCAAGAGACGAGCGGGCGGGGCGGCCATCCGGCACGGAAAACACAGCGATATCTTGCCACCAAACTCCGCCACGAACGTCGTCTATTCCGGTCGTGTCGAACATCATTTTATTTAACTCACAACAATAACATTCGGGGTCGAATGTTAATGCATCCCTCCATTTGTAAATTGCAATCGTCCGACTCCTGTCGTCAATTTGATAAATAACTGGACGAGCGAACTGTCTGCGTTGGCTCATTTGATTGATT
>c172.graph_c0
GTACATTTTCAACAATTTTAAGATTTAAGATTTTGTTTATATTAAAGTTAAGTAAAGAGGTTGGAAACTGTATATTTACTCTTTAGTAGTCATATCATCATTTTTTATTAAGAATTTTTGATTATATTTCTACATTAATATTTCAATTAACAAATGCACAATTTTTTGTTTCATTGATTTTGTATCTTTCTGGAGAACGGTAATGCCCTTACAGCTTTGTATCTACTAAAATATGGCTGTGAATAATGACTTGTGTAGTTATAATAATAAATATACAAAAGAAAGGGTTCTGTTTCATAATAATAATTAAAAAAGGTTTTTGTATCTTATGGGCTTTTCTTAATGACTTGGTCATCTTCAAACCCATGGTAGTGTTAATTAAAGTGTTCTTAAGGG
>c17210.graph_c0
GAACTTCTTCACTTCCACGACCACGCCCTAATAATCGTCTTCCTAATCAGCACCCTCGTGCTTTACATTATTGTGGCCATAGTAACAACCAAACTTACTAACAAATTTATCCTAGACTCCCAAGAAATCGAAATCATTTGAACCTTGCTCCCAGCTATTATCCTAATTCTGATTGCCCTCCCCTCCTTACGCATTCTTTATCTCATGGACGAAATTAATGACCCCCACCTCACAATTAAAGCCATGGGCCATCAGTGATACTGAAGTTATGAGTACACTGACTATGAAGATCTCGGCTTCGACTCTTATATAATCCCCACACAAGACTTAGC
>c17225.graph_c0
AATTTTATTCGAATGGATAATTATTTCTTGAAAGATAATGAATGATTACGTGAAACGCAAAAACATTCCCGTAACGTTACCAGCGATCGAAACTTTGCAGCGTAATGTAAAAAAAGTACCTTCCTATTATGTTAGGTAAGATTCCGTCTTCGGTCGCACGACCACATATATAGCTTATGATCCTAGCGATTTCAAACTTTTACATGTCTATCTTTAGCAACCATCCAGCCATAGAAGAATTCATCTTCGAAGAAGAAGATATATTTTACGAAGATTGTAACGGACACATAAATAACAAAAGCAGCAAACGACCAAGAAAAAAAATTATACTTAAAAGTATATTGATTTATATTATTTTTTCAGAAAACCAAGAGACATCCCTTTTCATTTACCACACAAGAAATTAT
>c1723.graph_c0
ATACCCCAGGAACGAACACAAAGCTTTTTTAATAAATTTAAATATTTAGTTGTTTTTTCAACGGTTTCATTTATATGTCTATTCCAAAGTAAAGACCTATCACATACCTAAATATCTTACACAATTAACACGTACCATGGGACTGTCATTGATTAGAATATTTACTTCTTGTCTTCTATGTCCCCTACTAAAAACACAAAAGTTAGATTTACTACTTGATAGTTCCAGACCGAGTGGGGACAATGAATTAACAATAACAGAGAGTGCATCCTGAATAAGGTTTGAGCTGATATTTAAATTCTTGTTACTGATGTATAGTACAAAGTCGTCAGCATATTGGCACATATTTACATTTTGCATTGTTTGACTTAATTTCAAAGTTACTATATTGA
>c17234.graph_c1
GGCTTTTGGGAGAGCCTAATGTTTCTGACTTTTTCCCACGGTTAGCGAGAACAAAACCGAAAAAAACACTAATTGTGCTTTCCCTTTAGATTCATTTGTATTTTCTTTTGGAGCTTTTGAACAATGGAGTCATCACAAGCAACGACGAAGCCAACGAGAGGAGCAGGAGGAAGGAAAGGTGGAGATAGGAAGAAGAGTGTTAGTAAATCTGTTAAAGCTGGTCTTCAATTTCCCGTTGGTCGTATCGCTCGTTACTTGAAGAAAGGTCGGTACGCTCTCCGATACGGTTCCGGTGCTCCGGTTTACCTCGCCGCCGTTCTCGAATACCTAGCCGCCGAGGTACTTGAGCTAGCTGGGAACGCAGCGAGAGATAATAAGAAGAACAGGATAAACCCTAGGCATCTATGTTTAGCGATAAGGAAC
>c17242.graph_c0
GAACCCTCGGGATGCGTAGGACTGGCGAAACACGTGAAGGAAGCTTGCTCGAATCTTGAGTTTTCTGGTTTGATGACAATAGGGATGGCTGATTACACTTCAACCCCAGAGAATTTCAAGTTGCTTGCGAAATGCAGAAGTGAAGTGTGTAAGGAGCTTGGAATACCGGAGGAGCAATGTGAGCTATCTATGGGGATGTCTGGTGACTTTGAACTAGCAATTGAACTGGGAAGCACAAATGTGAGAATAGGATCTACTATTTTCGGGGCGAGAGAGTATCCTAAGAAGTAATGATGTAAACTACTGAGTGATGAGATTGATTCTAAGTTTGAACATCAAAACCAGTTTCAGG
>c17245.graph_c0
TCGGCGACATGATATACAAAAGAAAACGATTCAATATACAAAAATTGAGCAATATAATTTTAGGTTTATGCCTAAGATGAATCTTTAAATGTATTACGGTAGTAATTTTTCTATAAATATGAATTACTCGGTAGTTTTCTTGTTCATCATCACTTGTTGTCTCAAAATATTTAAAAATAGCATTATTAGTAAGTTTTGAAATTTTTACGCATACACGAAACAGATAATGACTTATTGTTAACATAAGCAAAACGATTCCTACATCTACAATTTAATAAACACACTGGATTCAATATTCAAGTAATAATTCCAATGTGATTGATGCAGTGGCGGATTTGTTCTAAGGCCCAGGAGGACAGGGCATAGAGAGGCCAGATATTAGGGACGGTCAATCGTGGCAAAAAATTCACTGATGATAAGAAGAGATAACTTAAAGTACGTAAATATTCTATAGGCTCGCGTACATTATGGTGGGCCGCACTGCAATCGCATCGTATAACAATAATCATCCTAAATCACTTTTGTCCTTTT
>c17254.graph_c0
GCCATGTTTGATGCTTGTGTCACGGCATTCATCACTACGAGTCCCAGCGGTATCAAATACATCCAATATTTCGCCCAAAATGATCTCTCTGGTGGTGGTTCAACTTCTCCCTCTACATTCTCACTGCCTAGAATCTCCTCAGTGAATATTGGAGTTCTTGGCGCCTGCTCACTGCTTTTCAGAATTGTGTGAGAGTTAAACGACCATTTTGCTGGAAGTTTCAATTGGCGAGGATATTGACACGCCCCAGGAGAACCATAACTAACTGCCAAGATGTTAGCACCTTCCATGTGTATAATGAAATGCTCAT
>c17265.graph_c0
GTCGGATTTTCTATAATTTCAAGTTTAGCGAGATGTGCAGGAGTACACACATACCCCAAGCACATCCGTATCAAAATAGATGTAGGATTTTTTTAAACATGTATTTACAAAACCATGGTTTTGTCGGATGAATATGATAATAGAATTTCCCTTTTGAATGGCTACTAACTGCCCAGAGTTCTTTCCAAGATTCCCAAAGATGAAGTCTAAACAGTGCCGCCAGGTCTTGACTATAATTTTTATAGACAATATAATAGAGACAAGGGAAATGTTCATAAAGTATAAATATTTTTGGAAACAAGCTAATCGCAGTATTACTCAAAACGCTGAAATTGACATTCATTGATTTATATTATATAAAAATGCAGTCATCACTTGGAGACTGTTTT
>c17293.graph_c0
TAGACTGAAAACAGCTACTCGCTTTATCTCCTAAAATTTCGTTATGAAACAACGGTATTCACTTCAGAACATAGTTTTTTTTTAAGTTACAACAGAATAAAACGATTGCATTGTACCTAGTGATAGACACTGCAATCGAAAAACAATGGCGATCATCGAAAGATTTACAATATATAGGCGGTCGTCGTTGTTAGATTGTACTCTATCGTACACATATCGGATTAGCAGTCAAAAAGTAAGATTTACGAATTGCGAAAATAGTTACAATACTCTGTTACTTTACAAATATTCAATTGGTATATTTATTATCCTTATTATTCGACATGCGATATTACACGAAGTGGTGTCCACGTTTTTTTAAACTTTCTGAGGTGTACAGATTAAATCACCTGTTAAATATCGAACCAATATACATATGTCGGACTAATATTACTATAAATTTCAATACGTTTTTTAGTTAAAATTTAACGGGTAACACAATTGACTTATTGTAAAGAGAAATATACTTAGTGAAGAATTTTGTAGATTTATCAGATAATGTCATAGTAGCTCCAAGTAACAGAGTGATACAGAACTAAATTCTTAGATGTTTCAATCCCTTCCAGGTACATAATATAGTCTCATCCTAACTAATATTATAA
>c17324.graph_c0
GTTAGATATCTGAAATAGGTTATATAGTGATAACTTACCAAATTGATAAAAACTAACTAGTTTTTTGCATTTAACCACAATCTGAGCTGATATGACAATGGGGGCTGAGATGGTAAACTTAAAGGAACTGGTTGTCAAGGGCAGCTGCCGGGAAACACCAAGATATGTTTGGCGACAGATCTCCAGCCTGAAACTGGTATCTAACCGGGTGGGATAGCACCTTTCATTATTAACTATATTCAATTTTCTATACATACCTTTCCTTATAGTGATTTTTCTGCACTGGCAATTTAGAAATATTTTGGAATTATATTGAACTAGCGGGCCTGCTGCACGTTGTCTTACCCTGATAATAAAAAAAAAGACCTTGACAAATTCTACACCTAAACCTTCCTCACAAATCACTTTAT
>c17382.graph_c0
AAAACATATTAAAGAAAGATACACAATACAATACAACATATACGAAAGTGGACAAAACACTGCGCATCCCAAGATTATGAATGGGTGTCCAGCTGAACATATGCTAAATTGTCACAGGAAGCTATTAGTGCTGATTTTTGGCTGAAACTTTGAACATTGTGCCACCAATAAAAGAGTATTAAAATACATACTACATGTATTTATTGTAATGTGATCACTCGCATTAGAGGCCTCAGGGGTATTCCAGCATCATGTACCAGCAAACCTAAAACTACACCAAAAAGAACAAAAGATAACTATACATATATTGGTACTAGAAATTATACAATACAACCGTTTATTACATTTGTAGTGAAGCCTTTGTGAATATCATTAA
>c17394.graph_c0
AGCTGCTGCAACATCTCCTCTATACCTTGGATCACCACTACCTGCAGTACCACAAGCGTGAGCACCAATTTCAAATGATGCTGATGTACGTCCAAGGTTTGGTGGCAAGTGCACACATTGATGGTTGGAATAATGACCCTTTGAGAAGACGATACCAAAGAAAGGTTTGTCAAATGTAAGAAAAACTCTCATCGCGTTCTTCTCGCATTTTACATCTAAAGAAATAATCTTGGGCATGTCTGGGGCAGGAGCTGGCCATACATCTCCGGCTCCGCTGAACACTTTTTCACTGCCTGAAGCTTGTGTATCAGCTGGTGGTGCGGACGGTGGTGGTGGTCCACGGAAGGCTGGA
>c17397.graph_c0
AGAATAGATTAAAGGTACATGAATTCTTTTATCAAATAATAACTGTTTATTGTCTGTAAAGGTAAAAACATTTTTTAATCTTGTACATTTTAATGTGTTTATTATGCGAATTCCGGTGCATCGACGTCAGCATTGTTTTCTCTGAGATTAAAATAAGTTGTAAAATAATAACAATAAAAGAGAAATAGCCAAAAACATTAGTGTGTTATTCTATTGATTTTCGAATGTTAAAGATAGATTAAGGCAACATAGTTCGTCTGCTGTATTTTTAAAGACAGATATATTCCAATGAACATATCAAATTTTAAAACCGAG
>c17425.graph_c0
AGATGGACTGCGGTGCCACCAACGAGTCCAAGAAGCTGGCCATGGCCCTAAACATCAAGGCGCTGCCCACCTTCCACCTCTACCGCAACAGCAAGCAGATTGACAGCATGACAGGCGCCAAGATCAAGGCGCTGACCGACCTGATCGGCAAGCACCTCTAAACGCGCCCCCATCCGGCAGCGGGTGAGCCGGTCGCATCATGGTGCCTGCGATTTTTGGCCGCGGCTGGCGTTCCCTTTCTTCGGGTTGGTTGTAGTAGCACGACTACCTAATGCGCATGAACACAGCACACCACAGCAACACAGCACGCTGCGCGGCAACATGCCAGCCGAAAAAGGAGAGAAGAGAACAAGAGCGGTTTTGGTATTTCAACTTCTGTTTGTTTCGTGCCGAAAGGATTACGCGAGCGGCAGGT
>c17432.graph_c0
ATTAATTCATATTAAAAAGTGATACGAAACGAAATAACTAATTCAAGAGAAACAAAGCTTCGTTAATAGAACAGTGAACTAGATCTACATATTTCACTTTAATTGAAATTAATTTCAGCGGTGAGCCTCAGCCTCATTTCATTAATAGACTTCAGTTACACAGTATAAAAGGTATGCAAAAGAGATATTGTTCAAGGTAAGTGACTCAACTAGGCGGTTTATATTCTCTTTTGATTTATAAAAATGGGTCACTACATTCGGTCGACGAACTCCATTGTGAACCTTCTAAAATTATGGATAAAGACAGCGTTATCATATTTATCTATATAATATCGAATGGAAACGGTAGTGCAATGTGAGACCGT
>c17434.graph_c0
ACGGCTGCCACGGCCGCAGGAAATATGATTACCGACCAAAATAGAGAAAGAAGGTTCGGTTTTTCGAGGAAATCGAGTTTTAAACGCTCTCACACTTCTTGGATGCTTGATCCGAAGAAAATCGTCCTCTTCTTTGCAACTTTGTCAAGCATGGGATCAATCTTGTTAATCATATTCACACTCTCGATCAGCAAGTCCAATCCCGGAGATATGCCTCTAGACTAATAGTAAACACACGAAGAGCATTATATATAACGCATATATATCATCGACCGACCTAAGTTTGTGGCCATAGAACATGCCACAGTCTCACCGACCTACATTTTAAGGAGATGTATCAGACAGAAGAACATTACAAAAAATGAAGAGGGTAA
>c1745.graph_c1
GTTAATTTGTAATCAAAAAGTTGCAATTAAACATTAAAAGACAGTCTATAATAATTCCAGATCGATTAAGGAGTCCCCATGACATTAAAACAACTATTTTATAAAAACAAAATTGCCAAAACGACCTATTTTAATGGGACTTAATGTAGCAGTGTGCATTCCTAAAAAAACGTGTTTTTAGTAATAGGTTCTGTCATGTTAAAATGACCAGAAACTAAATTATTACCATTGTAAGTTTCATTCCGGGAAAAATCCTTTCAAAAAGATTTACAATCGTAAGAGACAATCATATAATTGCAAAACAAAACGACATATTTG
>c17450.graph_c0
AGCTGTAGGCGACGCACAAGGTTTTTTAAGGTACCAGGTATTAGAGACATATCGTGGCAAGATACTGATGGTCGAAGGATACACGTTTTCCAATGCATCAAAAGGGTGTTGTCAATGGCGTTGTTCCAGCCGAATTTCGCAGAGTTGTACAGCCAAGTTCAATTTCAGTTCAGATAACATGATTATAAGAGAGAATCTTGTACATAATCATCCACCACCGCAATATATGAAGAAACGAGGAGGGTATTTTGTAAAAATTATGTGAACGCCTCTTCTATGTCAGAGTATTAATTTATACAAGTTCAAGACTTCCAAGTGATTTTTTATATAATTAAGTTATTACTTTCCATAGGTCATTAGACTTTGAGTAGGAG
>c17454.graph_c0
GGCGGAATTGTGTAAACACTACTGTTTGTAAGTGCATTCTGACAGCGTAGAACGTCGTATGTGACAAGTTATTTTAAAGAATTTTATCCTCTCTACCCTTTGCCTAAAGTTTCGTTTAATTTGTGAAATATAGAAATGTTTTTTATAAGATGGTTTGTGCATACGTCAGTAATGGATTGGTCGATTGTCGTCCATCGGTGAGGTATCGTGGGTGGTCAATTCGCTTTGTTAGAATCGTGCGATTTGAAAAGAACATAAAGGGCGAATATAAAATGAACTCCGGTAATTTATATTTTCTATTTACAAAGCATGTTTTTGTTACAGCGAATCCATACTCGTAGCATTCTTT
>c17467.graph_c0
GACGGTGAAAAAAATTAAGTAAGGAAACCTAAACCCGAGAAATGTTCCTGTACTACCACCATCGTATGTGGTAAAATTATAGAGCTCTGAAAGAGAGTTTGAAATTGCTGTGTCACGCCGTGGGTTGGCGTTGTGATTATGCCTATATTATTTACTTTATAAATATGCCTATGTCCCCGGAGTGGGATTTATACAGGCTGACGTTATTATTTTCAAAGTTGTTTTTACATTTTAAGGTCACATACATAACTCCGTTTCCAAAGAATGCTTCTTCACTAAATCTACGCTATATTGATGTATCGGCTAATGTCAA
>c17469.graph_c0
GAGCCCTTGGCACAAGCCCTGAGGCGCAGGCGGCGGCTCCTCGCCGGGCGCCTACTTGTCTGGCAGCTCAGTCGCGGCGCGGGCGGGTTGCGGCGAGCGATTGCTCGAGTGAGAGCGAAGTGAAGAGTGATTGCGGGACCGTGACAGGCCACACGCATTTGGCCGCCTGGCGGACCTCTGGGCACAGTCGCGGGGGCGGTGCCTCAAACATGAGAGGCCCGCTTGAGTACAAGAGAAGAGCGTCTGACAAAGAGTTTTATATAGTCCGGAGCGAGACTGTTCGCCCGGGGCGTACATGGATAGAATGACACTAATGATATGACCGACCGGG
>c17503.graph_c0
GGAGGACTAATAGGATAGGTGATGAAGGTTTACTTTCTGTAGCCAAACACTGTTTAAACTTGCAAGAACTTGTGCTGATTGGTGTTAATGCAACACATATGAGTTTAGCAGCCATTGCTTCAAACTGTGAGAAACTCGAACGGTTAGCACTTTGCGGAAGTGGAACAATAGGCGATACAGAGATTGCTTGCATCGCTAGGAAATGTGGAGCATTGAGGAAATTCTGTATTAAAGGATGTCCTGTTTCGGATCGAGGGATTGAGGCGCTCGCTGTTGGTTGTCCTAATCTGGTTAAATTGAAGGTGAAGA
>c17512.graph_c0
CAAGCTGCTTTAGGTGCAGGAATCCCTAACTCTGTTATCTGTACTACAGTTAACAAGGTTTGTGCATCAGGCATGAAAGCGGTAATGATTGCTGCTCAAAGTATCCAGTTAGGGATCAATGATGTAGTTGTGGCGGGTGGTATGGAAAGCATGTCTAATACACCAAAATATTTGGCAGAAGCAAGGAAGGGATCTCGTTTTGGTCATGATTCTTTAGTAGATGGAATGTTGAAGGATGGACTATGGGATGTCTATAACGACTGTGGGATGGGAAGCTGTGCAGAATTATGCGCTGAGAAGTTTCAGATTACAAGGGAGCAGCAAGATGACTATGCAGTTCAGAGTTTTGAGCGTGGTATTGCTGCCCAGGAAGCTGGCGCCTTCACATGGGAAATCGTCCCGGTTGAAGTTTCTGGAGGAAGAGGTAGGCCATCAACCATTGTTGACAAGGACGAAGGTCTTGGGAAG
>c17513.graph_c0
TTGTACGATGTTATATTACTATATATTTACAAAAGGCATAATAATTAACACGTTTAGTAAATAGTTTTCAGTGAAAAATAAATGGTGACATTTTACAAATAAAATCATAGACAAATAGTCTTAAGAGCAAAGGTCGCAAGTTTTAAAAGCCAAATTAGAGAAAGATTCTTATAAAATTTTGTGAGTTCTTATTCTTAACTAGCTATGGTTTATATTAGATTATAACCTGTGTATTATGGGATTCGAATAATTTTTCACTAATGATACAAAATATTTAAATTTTACTGTTAGCAATTTGGTATTTGAAACAAAAAAAGCAAAACGTTCTATTTTCAACTTTATAATATTTCAACAAGATTCGAAATCATCCAAAGATATGTTTTTTTTTTCGATAATTTTTGAGGCGAGGGAACACACATGTGCAGCCTGCAGCGGGTCGTTAGTTTTACTTTTTTCAACAAGCTCCTTCGCAGACACAAATTCGTGTCAACACAAATTGACACAGATGTTCCAGTAAATTATTATCGAG
>c17535.graph_c0
GAAAGATTCGCCAAAAGCGGATATGAAACTCATTTTCTTGGCGAGCTTGGCGTCTATTGAACCAATTCTTGATAACCAAAGAAAATGATCAAAGAAGAAGTAAACCATTTCCCCTGAATTGGCTAGGACCGCCAAGAAACGGATCATCGGGGTTGCCCCGGGGTTTCGTCTCAGCGCATTGAACCCCGTGAGAGATCTCCCGGTCCTGAAGGCTTTGCGGCTGAGACCGGAGGCGACCTCCCACTTCTTGAACCTATCGGCGGCTTCGGGTCGTGTGGCTTCAACATGCCAGCACGCGAGCTTGGCCACGTATTGGAATGTCTTCACAAGCTTGTCTATTCCGTCTCTCTTGGCCAAGAACACCACCAGTTTGTCCACAGTGTCCAAAGACATCGCTAACGGTGGCAGCGGAAGGAGAGGAGATATGAAGTTATGGAGATG
>c1754.graph_c0
ATTAGTACATTTTTGAACTAAAAATTTTCAATTCGTTTCAATTTTTTACTGAATTGAATTGGTTATAAACTATTTCTTTATAAATATTGTCAGATTAAAAGATATATATAACAAATGTGATTATTTATTTTATATTTAAAACTGAGTTCGATGAACAAAAATTGACATCAACCCTACTTGTGAACACAACTTGCACAAAATGAGAGATAATGTTTTATAACGATTACAAATTATTGTAAATTATAACAAGTTTTGAACAATAGAAAAAGTTTAAATATATATATTTTCGCATGTTATATGCTGAGTTGTACCAGGCGCTCCGACGCTCTCACTGA
>c17551.graph_c0
AAAAAATATTAATCGACTTCTTGAGAAAATCATGGACGACTTAGGGGAAGCTTTGGTTTTGATGAGAAATCAAGAAAATGGACTTTCTGAAGAAATGGGATCTTTATTTTCTGTGAAGCGTAGGATGATTGACTTAGTGCAGTCTTGTTTTAAAATTTATCAGGAACTTGTTGTTTTACGGTTACAAAAGACAGAAGAACATAAAAAAGAAGAAGAGGAAGAGTTAAACGTAAAAAAAATGTTTAAAGATGTTTTAATGTGAAATTAAATATGATTGTAAATAAATTGATTTAAGACTATCGTGTATAACAGCTTTAGGTCAGGGGCTTCTTTAGCTATCAT
>c17564.graph_c0
CAAGAAGAACATCAATATTCTTTGGCACTGGAATCTTCCTCCAAGCTAAAAGCTTTAACAGTGTAGACTTTCCCATTCCGTTTGGCCCGATCAACCCATACCTTTTACCATGTGAAATCCTGACAGAAGCATTCTTCAAAAGCTCTTTACCTCGAGCAGATACAGAAAAAGATTCTATGGTAATATCCTTAACATTTGCATCAGCCATGTCGTCTCCTTCAAGCACTGAGGTCTTGCTTCCAATAACAACCGTGAATGCATCATGATCGTCCTTCATAGCCTCCCTCTTTGCCGACTCTGCAG
>c1757.graph_c0
ATCCGGTATAAAAGACATAAACGCGTCACATCGGTCAAAACTCCGCCGAGGCAATACTTCGCAATGAACGTTACTTACTATATCTAATAATAAGTTGTTGTATAGTTTGATATGCATTTTGTTCCGATTTGATTTACACAATATTACAGATGTAGGTATAACGTTTCGTGTTTTTTAATGGTCGACATGCTTGTGTACCACTTGCCGCGCCGCACCGATAGCTGCGGGAATGCGGAAAGTAAACTGTAATTGTGTAATCTGAGGAGAAGGAGCTAGTTGGTTCGATTCCCAATTAAGTGTTTTATTTACATCATGTAGTAATATGTTATTCCGATATGCGAAGCACACTCGTAAAGTGATTACGTGTGTATTGCG
>c17573.graph_c0
GCCGCCCACAATTGGATTTATGATTTTTAAATTTTTTTATTGCAAAGAGTAAAATAATAACCCCTGACATTGATATAATTCTCGGTAAACTTGTCAGTGAAGAATGAGTTAAGTATTATAACATAAAACTGTAAAATAATTGTATCTCCTAGACCATAGTCTAATGATTAATCATGATTAATATCTGGAAATCACTAAACAAAATTCATTATTTATAATTAATTTTCAACAAATAAATACATATATTATAAAAGAAAGTCATTTGCCACATGTCTGTCTCTCTGTTCACAATAAACTCAAAAACGACAGCACAGGATTTTCTTGCTTTTTCACCAGCTGATAAAGTGATCTATGATGAAAGTTTAGGTATACTATTTGTTAAGGTTTTCTTTTATTA
>c17599.graph_c0
CGGTCCGTTGGCGCGGAATCGCTCCGCCAATCAGGGCACACGGATGCCGCACGCTCTCTGCCAAAGCGAAACTTACTATACAGAGCGGGATGGCGATAATATAAGTCACTCTTCACTTTGTTTCTTTTATTTATTGTTTGTGGTGATAATAATGCACTAGTTTATTTTAGAATGTTTATTTGATTTGATCTAATAATGGTACGAACGAGACAGAGTGGTGTAGACGACTAATTCTTTCATTAGCGTCAGCGGCACAACACTATATTTACAACTAACAATCCATTATATACATTATATTATTATTTTCACTATCTTAGTAAATAAG
>c17612.graph_c1
GGGATCCCAAGCCACAAGCTGGCAGTGGATAAACACCTCTTCTCCAAGAGCAAACTTAAAGGCTTGAAGGGACAAGTGGATCTCTGATGATTTCTGCCTTGGTTTGAATCTCGAGCGCGATATCTTGCTGTCCACAAGACATCCCTTATTGGTGATTATCGGGTATATAGTGCTTTCAGGCTGCAGCTCTGGCGTGGTAGCCGCTACGCATTCCTCAAGCAGCAGCAGCAAGGGTTGATGGGACTTCTGCGCTACACTAGCCATGATGGGGATAAAGGAGCCCAGAGGAAAACTAGTAGATTCAGC
>c1763.graph_c0
TTTTTTATTTAATGTATTGCATATGTGTTCAAATAGTTACAATCGTTTTTGTTTTTAATATTAAATTGCTGAGTTGTAGGGATCTGTCCCCGGCGGGTTTGCGAACATAATGTAAATAGTGATCAACGCGGTAGAAGTACCCGGCTTTTGATATGGCATGTCGGAAGTGAGACCGAGACAGCCGACTACGTTTGGATTCGTATATTATTCGTATATCTTTGTCTATCGCTGTTATTGTACGATGTATGATAAAAAAAAATTAAACCAACCATAGTTTGACATGTCACTTTTCTCCCTGACACGGTGACAAATCAAAAACCGGG
>c17660.graph_c0
GTAGCTTACACAGATGGGCATCTAATCAACACTCTCGTCTTCCTCGAATCACTTCTATTTCTGAGGCTGACCAATCTCGACCCATTAACCAAGTCGTCGCCTTTTCGGTTCCTATATCCAGAAGAGACGCGAGTATTATTCTTCTCAGCTCGATTCCATTGACAAGCTTCTTCGTTCTAACACCGAGCTCTTCCGAAGCTAGAGAGAGACGTAGCAGAAAAGTTATCCCTCTCGAGGAATATTCCACTGGCCCTGAAGGGTTGAAATTCTATGACATTGAGGAAGGCAAAGGTCCAGTAGCAACAGAGGGATCAACTGCTCAGGTGCATTTTGATTGCCGTTACAGAAGCATCACTGCAATTTCTACCCGAGAATCCAAGCTTTTAGCTGGAAACCGTAGTATTGCTCAGCCTTACGAGTTCAAGGTGGGATCTACGCCAGGAAAGGAAAGGAAGCGTGAATTCGTTGATAATCCAAATGGGTTATTCTCTGCACAGGC
>c17661.graph_c0
AATTGTTATACATCTATTAAATTAATTAGTTATACGATGGAAAAATACACAATAAATGTTCACCGTAAAGCTATTGATATTTTTCAAATCTTTACAATTATCAAGAAAATTATATACAAAAACTCGGTAACGTTACTTTCAATAAAGACTCCAAATGCAAAGTTCAATCACCTTTTAAACATTATATATAACATAAGTTATACGTATTTAACAATAATATAATTTTATGTATAACTGCATAACAAATAAAATGGAAACGCTACTAAACTTTGCGCTAACAATAGTATTTCTGTATCCTTTTGTTATGTTGTACTTGCGAATTCTAAGGTCAAAACTTATGTAAATATGCACGTCATCACAAAACGATACACACGAAGAGTCTAACAGATA
>c17668.graph_c0
GGTCGCTCTATCTTCTTCACACGCTTTTTGTGTTTCTTAGTCTTGAAATGATAATCCATCACTGATGCATTGGAGAAGTTCCGATGGCAGAGTAAGCAGTTGAATTGACCCATTCCAGGTAAATCCTCCGTCTCTGGTTTACGCAACTCTGTGAATACCAAATTAGACATCAGCTTTGGGCCATTGTCCGGCATCCCCATTCCCCCGGCTAAATCTGCATCGAGTTGCGAGTGTGGCGCTTGTCCCATCATCATATTCACACGCTTCTTGTGTTTCTTAGTCTTGAAATGATAATCCATCACTGATGCATTGGAGAAGTTCCGATGGCAGAGTAAGCAGTTGAATTGACCCATTCCAGGTAAATCCTCCGTCTCTGGTTTACGCAACTCTGTGAATACCAAATTAGACATCAGCTTTGGGCCATTGTCCGGCATCCCCATTCCCCCGGCTAAATCTGCATCGAGTTGCGAGTGTGGCGCTTGTCCCATCATCATATTCACACGCTTC
>c17690.graph_c0
GTCGGAAGAAGAAATCGCCATGGTAGCCGCAACAGTAAACCTCGCGAACATGACATGGACGTCGTTAAATTCAAATCCAGCAATCTCTTTCTCCATGTTAAGCGGAATCAGAAACTTGGGCATGTTACCTTTCAGGAGATGTCTAAAGCCGACAGTTATCGGAATCGCGTCGTGGCCACCACTCCGTTGTTCTTCTGTTAAGGCTATGTCTTCATCATCGTCTTCGTCTGGATCGACATTGGAGGAGACTGTTAAAACGACTGTGGCAGAGAACCCTGTCGTTGTTTACTCCAAAACCTGGTGCTCATACTCGTCTCAAGTGAAGTCCTTGTTCAAGAGTCTTCAAGTTGAGCCACTGGTTGTTGAATTGGATCAACTTGGTTCAGAAGGGTCGCAGCTGCAGAATGTGTTGGAGAAAATTACTGGACAATACACTGTTCCCAATGTTT
>c17696.graph_c0
GTACAATGCTAAAGAATAACAAAAATATATTGTCAATTAAATATTCATAGAAAAATAATACACTATTTACGTTACAATGTATAGTTGAGAAAGTACATTAAATGAGATTGAGTAGGAAGTAAAAAAAGTAGTAGAAATGTTTGGCTTGGCACTGTGTGTCAGATGAGAGAGCAGTAGAAATTAATTGGGACTGAAACAGAGGGGCGCAGTTAGTTCTTGACATAATTGAAATATATGGTAGGATGTTAAAATTAAATGATTTTGCAAGTCTAGAAAGTGTTTTACACTTTGTGTTACCACATTATCATACATTTATATGTAAAAAATACAAAAGTTTAAAATAAAAGTCTTGTGTGATACAATGTTCTGTGGTATTTATGTTTGTAATTTGAGACTGTTTTCACACATCAGTGTACTAGAG
>c17708.graph_c0
ATAGATCAATTGACAATGTTATATATAGTTGGTAGCTGAGATATTTAAAATTACGATCTGCGTAGTTGTCTAAAGTTTTCAACATGAAAAACTGACAGATACATGTAAGATTTCTTAATCCACGCTCTACATATTTCACAAAAGTACGGCGTATAGATAAAACAGTATGACTATTGTTATGGGCATGCGATAACACCGTAATAACATCCGACAGCTGTTATTTGTAGGCGGATAAAAATGTCCTTGCACTGTATGTTTTGTATATTTATTTATAATAATTATTACGTCGGTGATCTTCGCTCCCTTGTTTCCAATATCGTCGTCCCGGCTTCAAAAT
>c17720.graph_c0
AGTGCCTGGGTCTTAGGTCACTCTTGATTGTACATTTAATTTTAGAACTCATGATTATGTTGATTTTGGAAGGCATCCAAGGTTGATCCGTCTTTTATGTTGATCTAGAAGCGATACTTAGTTCATTGCCAAATGTATCCCGAACTGATTTTGGAATGCGTAAATACATGATTTTGGAATACATCATATTTTCATTTTTGTCAGCAATCTAAATACATTTTAAAAAAGTTGACTTTTTAATGCATTCCTAGTTGATTTTAATTTTGAATTCCTCCTGAAATGATATTGGAATGAATCTTAATTTGATTTTTGAATACATCGTAAATTGATTTTGAA
>c17725.graph_c0
GAGAACTAGCGACAATAACAGCACAGATGATCATCCCTGGAACAGCCACTCTAACGATCACTTTCACCAGCTTCCTGTTGCCCCCCAGTATCATCACCATTCCCCATCGTTTTCACTACCCGCTGCTCATGTGGTTGATGGTGAAGTTGACTCTTCAGCAGCACGAGGCCTACCTTATGCGCATCCATTTCTTTTTAGTCACCGGTCTAATCAAAGGTCCTCACCAGCAATTAACAGTTACCAAGGAAGCAGCACCCAAATGCGTGAACAGCATCATGCTTATAATCATCAGAGGCAACAACATCATGCCAATGGTCCCACTCTCGCATCACCTCTCATCTCCATGACAAGAAGGGGATTACCGCCGCCGCCACCT
>c17726.graph_c0
GCGGCTAATCTTGGTAATGAAGTTACGGGGGTTGTTGAGGTCCGAAGATATTGGCATCCGGACTCTGAGGGTGCAAACGTTAGGGTACTCTTTCAACAACTCTTCAACCATGGCCTTGGTCTTTGAATAGAAAGAACCAGTAAAATTGGGTGTGTCTTCCTCTTTGAATCCAATGCCTGAACCTTCTGGGTGTGCAGCATCATATTCAAATATGCAACCAGTTGCAAAATTCATCATCAGTAAACCGTGCTCTTTACAAACATCTGCCAAGTTTAGAGTTCCAGCAACATTTGTACGGATTGTTTCAGTCTTATGACTCTCACACCAATCAACATTGGGCCTACCAGTGACACCAGCAGCATTGAATACATGTGTGGGCTTCACAGCATGAATG
>c17727.graph_c0
AAGCGCTTGTAAGAAGACACTCTCAGCTCAAGAAGGTCAAGAGTGCTCTAGGAGGCAAGTAAATTACAGCATACCGGTGTTTACCAGTAAAACCCATGAAGTGAGGAACACACATGTCACCGACGGCGGTGGTGGTGGAGGAGGCGCCACATATGTCTTCCTCTTGGATAAAGAAGGGCAAGCGTACCCACTGATAGCAGCTGGGGGCGGCGGAGGTCTGTCAGTAGGCGCCTTTCATGATGATGGGTCGCAGCATGGTCGAATGCATTCCAATGCCACTCCTGAATCTGGCTACATGTATGGACATCCTGAACGTACTGCAGGTGCTGGTGGCGGTTGGATTCCTAGATCAGGTCCTCAGACCCCTGGATTCGAGATAGTGAGAGGCGGCGCCGTACGGGAGGGAGCTATGGGAGGACTCGCGTGTGTTGGTGAAGCTCACGGCGGCTTCGGTGGTGGAGGAGGTGGTTGTTTGCGAGGCGG
>c17740.graph_c0
GATGGATAAAGTTTTCAATTCAAAGTTGAACAAAGCTGTAAAAAAGACATGGTGGCTTATGTAAAAGTATGTCATCATTTTCTAGGTAACACAAAAGCTAACAACTACCGACAAATCATTCGAGAGCTTATTCCTGCTTATAAAGCTTTAGGATGCAATATTTCACTCAAAATTCATTTTTTCGACTCGCATATAGATTTCTTTCCGGAAAATTTCGGTGCCGTATCATATGAGCATGGTGAAAGTTTTCTTGAGGATATTATGCATATTTAAAGACGCTACAGTGGAAAATAGTCAGCAGCAATGCTTGCTGATTTTTGTTGCTCCATTTGTCGAGAAACTTCGATGGAAACGATGAAAAAAATAAATAAGATAAATATCCTGAA
>c17752.graph_c0
AGCTGGCACAGAGTTGCGTGATTAGGTGAAAGTTAGGTAAAGCCTTTATCCAGTAGTGGATACCTGTAGGCCGATGTAATGGTGATAAGTAGTAGCTCATTCATGGTCTAGTGTTGACTTCAATGGTACCTGATTTAAGTTACAATGTGGCCTAAGATAGTAAAGATGTTAAGCTTAGAGGAAATAGGTAGTGCCAGTATTAAACGAATCTATAAAAAGAAAAGGTTTTATTATCGGTTTGTGATCAATCAACTCAAAATATATTTAGTCAATTTTAAATTTTCTTACACCTACAGAAAGCTACATACCCACAGAAAGCTACAGACCCGCATGCTGTGGAGAAAGTTTTGTAGGCCTATGACCAGTAGTGGACATGTATTTGGCTACAAACTCACCTGATGTTAAGTTACAATGAGG
>c17753.graph_c0
TGACGACGTCGTTTTGGCACCTCTGTTTGCCGACATCGCTGATACTGTCTACGACATTCTCCATGGGAGGATTTGGGCAGGTCATAACATATTGAGGTTTGATTGTGCAAGGATCAGAGAAGCATTTGCAGAGATTGGTCGTCAACCACCCGAGCCAAAAGGCGCCATTGATTCATTGGGTTTGCTAACTCAGAAGTTTGGTAGAAGAGCTGGTGATATGAAGGTACAACGAAACATTCGAAAAATGTTAATATTTTCACGAGATTAGAATGTTACATGCTGGAAATTTATCTCTTTGATTGAG
>c17759.graph_c0
CTCCTGCTCTCTTAACCTCATATACGCAAAGAATACCGCGTAATGGAACTGCTGCTCAAAGGCTAAGCAAAGCCTTCTGACTTCTTCTTCATAAAATGCTTTGTCGAGCATCTGGCTCTCTCCATAAGACATCTTCGAGAATATAGCTTGATACGGAGGATATTTCTCCATAACACCACGAACCTGGTCTATATCCTCGCAGATAGCAAGCTCTTCGTGACCATATGGATAGAGTAGACCAAAGTTAGAGTACAGTTTCTTTCTGTCTTCTCTTGTGAGCTCAGTGCCAATGCTGTTGATAGTGATATTCACTGCTCTCCTGTCGGCTTCAAAGGCCAAAAGGTCAGACATAATCTCTGCTGTTGCGCCACCAAG
>c17765.graph_c0
GGAGCCGTGTGCCCTGGCACTGAGCGGCCGCGGCCATGGCGTACGCCTATCTCTTCAAGTACATCATAATCGGCGACACAGGTGTTGGTAAATCATGCTTATTGCTACAGTTTACAGACAAGAGGTTTCAGCCAGTGCATGACCTTACTATTGGTGTAGAGTTCGGTGCTCGAATGATAACTATTGATGGGAAACAGATAAAACTTCAGATATGGGATACGGCAGGGCAAGAATCCTTTCGTTCCATCACAAGGTCGTATTACAGAGGTGCAGCAGGAGCTTTACTAGTTTACGATATTACACGGAGAGATACATTCAACCACTTGACAACCTGGTTAGAAGATGCCCGCCAGCATTCCAATTCCAACATGGTCA
>c17780.graph_c0
CGAAGAGGAAGCCATCTTTCTCCCAACGAAGGTTTGTCAGTGGCGGGTTAGCGCTAAAATGGCAGTCGAGGCTGGCCGGCTTTCCGTAAGGGAAGTGACGTTCTTTCGGTGAATATACCACCTTCGCTTTGTACTGTACGTCGAGAAAGGCGGCCGCACTCTGTATACGGTCCGCAGAATCCCTCACGCGACATTCGTACTCGCCGGGATCAGAGCTATCAGCTCGTCGCAGCACGAGGCTGCCATTAGCGCATAGGTCAGTACGCGCCGCCAGCTCAAGCAGGTCCACAAGCGGAATACCATCGTGATACCACACCACTGTAGACCCTGGTTCTTTTGGCAAGCATTCGAATTCGGCGCGCTCTCCTTCCAGCACGGTCGTATTCATCGGCGGCGTTACGATCAGGTTACCCCCATCAACTTCAAGCCGATAAAAGGTACCGTTGTTACGCGTGGGCGGCGTGCGGTTGGGAAAGGTGACGCGGCAGCGGTAGAGACCAGCGTCGGTCTCGCGCACGGCGCTCACGTTGATGGAGCCGAGGCCGAGGCCGGCGCGCCCGTCGCTCAGGTGTCGCACGCGTCCGCCCCAGCGGTCCGCCAGCCGCGCCCGTCGCTCCTCACTGTACCACGAGAATATCGTCTCGCCGTCCTTATCCCAGTGCAAGTGGTAGGGGATCTTATTGCCGAAGGGGAAGTCTAGGTGGCAGTTCATGACCGCATAGCCGCCGACACTTGCGCGCAG
>c17792.graph_c0
CGCCCAGAACCTGGCCTGAGCTCTCTGGTATGGGTCACTACGCAAAAGCGGAGATTTATCGTGCCAAACCTCATCAATATACTGAACTATTATCAGAGATTCACAAATGGGCTTTCCATTGTGGATCAGAACCGGGATTTGCTTATGAACTGGATTCATCTCAAGAAGCAGAGGGCTCTTGTTCTTCAGGTCCTCCTCTTTATATTCATACTTGAGGCCCTTCTCTGCCAGGGCAAGTCTGACCCTCATACCAAACATGCTAGGCCAGAAATCCAACAGGATAATCTCGTCTCCCATTGCTACTACTGTGATTGATAAG
>c17801.graph_c0
ACTAGTTGAGTTCTTGCCTAATAAGTGGACGTACGTTAGGTCTTTGCATTTGAAGTTGTCTGAGAGTTTAGCTTTGCCTATATATCAGTCTGTTCCTGATTTGAAGCTTAAAATCGATGCTTTTGGGTCTGGAAAGAGTGTTGTTCAGGAGGAGAAGGAAGGTGAAGTTGAAGAAGTTGTTGCTGTTGATGGTGGAGAGAAGAGTGTTACAGGGAAGGGAAAGAAGAAGAAAGGTAGGATTCACGAGGTTAGGTATATGGATAGTAATGTAGCTGAGGTGCTTGATGAGGATGAGATTGGTGGTGACGAGGATAATAATGAGATTGTTGAGTCTGAGG
>c17806.graph_c1
TTCAATCGGTGGTTCTCTCTGTGGCTGAATCAACTTTCTGTTTTATCATTGTCTCAGCTTGTTGGATTGCTCTCTGTGGCCCTGTGATACTCACTTTCCTATCAGTGGTTCCAGACATAAAATCACCTCGGTCTGATATTTTAATTCGGGCACCAGTCATCTGAGTGATTTCCATGATGTTTCTTCCTCCACGTCCAAGCACCAATCCTATATGCTCATCCGCAACACCAATTGTCACCGTGGTACTAGCTTCTTCCTTGTGGTTTTGATACTTGCCTCCAGAACCGTTGGGTGCGTAGTTAACCGAATTGTATCCCGCTGTTGCAACAGAAG
>c17817.graph_c0
ACATAGGTATAGATTTAGTGTGTTGTATAATGTACAGGTAGTAGGTAGTTACCTGCATACGCTTCAAGTATCATTAAAAATATTTCCGTGGCCTATTCCCTATGGTTAAAGCTCTAGCTTAGGACCTTTGGACATTCACAAAAGTGAAATTTACAGGTCGTTAGCATTCTTGATCAATACCTATGTATTACTACTAAAATATTCTTATACAATTCATAAAATACCTCCTGGTGGACTGTAATATTTGCAGTAATTTGTGTTTTTCACGGTGTTGTATTCTTAACTCAACCAATCGTGAAATATTTCATTCGGATTTTTAAAAACCTGATTAACTTATGTCAAA
>c17822.graph_c0
ATACTCTATTTAATGATATTTTATGACACTAAGTTGGTCTTAAAAAACCTGTGACTAATAGCCTTAATAATTTAAAAACGAAATTATTGTTGGGGTCACGTGATTTGTTTGCTTACATATCAAATTCTGTAGGTTGGTGCCTATCTACCTACCATTTTACTCTCTGGATTAGGGACGTTGCTTAGTCTGTCATGAATCGATTTTTAAATTATCACGTTTAATTTCGTATGAATCAATTAAGATAAATTTGAATATGATAATAATGACCTATAAGATTGATTATTCAAAACTCGATCTCTGAAGTATTTCTGAGATTTTTTTGTAACAAAATAGAGACAGAATAAACTGTCATACGATTATGGAACACGTTACCACGTCGACTTCAAGATATTGAAACGATCAATAGTTTTAGAACCCAACTGCACCGCTATTTATTTGAGAAACAG
>c17841.graph_c0
GGACAAGATCATCCTGCGCTTCGTGGTGAAGATGGTGGACACGGACACGCACAAGCACAGCGCCACCGACCTGGCGCGCCGCTTCATCCTGTCCTACTTCATGATGGACGACTCCAACCTCATCTTTGAGCCGCCCGTGCGCAACACCGGTATTGCCGGCGGCAAGTTCCTGGAGCGCCAGAAGATTTACAAGCCGCGCTCCGAGGAGATCTACACCTATCTGGATCTGTACGTGGGCGCCACCATCGAGGTGTTCAACCGCACCTTCGAGCTGCTGGAGGCGGACGAGTACACGCTGACGTACATGGAGAACTACAAGGACATCTTTGTGATGGCGGACACGGACGTGCTCATCCGCTCGCTCAAGGCGCAGGTCAGTG
>c17844.graph_c0
GGCTGCCTAAAACCAAAAAAAAACAATAAAACAATAACAGCCTCCATGCAAATCGCAATTTTCAATAATTAATAATACTTGCCATCTCCTAGCAATAAAATTCGTAATTCTAAAGTTAAAAAAATTTAAAGATGGCAGATCCAGACACCACTAGGACGGTTGTAGGAATCATTGGTAATGTCATATCTTTCTTCCTCTTCTTGTCCCCAGGGCCAACATTTGTCCAGATTTTGAAAGCAAAGTCAGTGATGGAATTCAAGCCAGATCCTTATATAGCAACAGTTTTGAATTGTGCAGTTTGGGTGTTTTAT
>c17863.graph_c0
AACAAATACAGCTCAAGAATCACTGAACCCAAATCCCAAGGTGGGTCTCAAGCAATTCTTCACGGTGTTGGTTTATCAGACGACGATTTGCTAAAACCCCAGATTGGTATCTCGTCGGTTTGGTATGAAGGGAACACTTGTAACATGCATTTGCTGAAATTGTCTGAGGCTGTGAAAGAAGGAGTTGAAAATGCAGGAATGGTTGGGTTTAGGTTTAATACTATTGGTGTGAGTGATGCTATTTCGATGGGAACGAGAGGGATGTGTTTTAGTTTGCAATCTAGGGATTTGATTGCTGATAGTATTGAGACTGTTATGAGTGCTCAGTGGTATGATGGTAACATATCTATTCCCGGT
>c17863.graph_c1
GTGATAATGTCACGGGGTTTTAAGTCCATCTTTAGCAATTCTAGAAGATATTTTCCTGCTAAGCGACACTCGTCCAACTTCAATGGGTCTTCAGCAGGTATTGAAGAACTGTAAGGAAGGGACATTCCCATTGCTTCGATAGCAGAAGCCATTGTATTCGCTGTGTACATGCCACCACAGGCTCCAGCTCCAGGACATGAATGATGGAGGACAGTCTTTCTCTGTTCATCACTTATGGAGCCACTAACAAATTCTCCATAACTCTGGAAAGCAGATACAATGTCATATGTCTTGTCTTGAAAATGGCCAGGCT
>c17866.graph_c0
GCGCTGTCTCAGAGCCTAAATTGATAAAGTATTTTTAATTTGATTTGAAAGTTGTCCTAAATGATTTAACACCGGAGTATGTATTTCAAAAAGATGTGCTTACTCTCTCCTCACTGCTATGACTTATTGTAATAAAAGATAATTTTCAATTGAAAATATGGATTCCTTCGGACGACGTATAGATAAACATAATATTCTAAATAAATATTATTTGTATAAACATGTATATATCTTTTTAAATAACGTAAACAAAATGTCAATATTCTCAAAGTTCAACGAAAATAAACACAACATTAAAACTATTGCCAATAAACTCACAAATCTAACTTTAAACATAGCCTTTAGAATCGATTACTTTCAATATCTCGTTGTATATCTTGGAAGCTTTATGCAAAGTAATGCTAGATATCTCTAGGATCGTTCTACGAAATGGTCTTATTAATTCCCCTTTATGTCTGCG
>c17868.graph_c0
GTTGCTTGCGCCTGTGTGTGTTCCAAGAGCTGATTCACTAACTTGTATGTTCGTCCTGATAAGCCTTTGGTGTGGTTTATCAACTGCTCATGCACGTTGGGCTGAGTAGGCTCCATGATTACAGTTCCTGACTCAGAATCAATCTTGGCATCAAGCTTTGAGGTGCGGATTAGGTTCACAATCCATCTCTCGGCCTCCTCATAGTTCAGATTCAATTTTTCAGCAAGTACCCCCATGTCAATCCTTTGATGAATTTTGCAATAGGTTTCAAAGACGAATAGGCGGGCATTTTCAAGAAATTCATCTCTCAGTGGTACAGTTGAAAAGTTTCCATCCTCAACTCGCTT
>c17871.graph_c0
TAGGAGAGCTTGCTCTAGCTCCTTCAGCAAACGCTTTCGCCAATTCTTCAAACTCAGTGGCCACTTCTGCCTCATCAGAACCAGTTAAACAAACCTGAACCATAAGCATAACCTCCGCGATTCTTGTAATAGCATCTTCATCATTTGAAAACACGCCGGGTTTTCTCCCCTCTCGAACCGTCAATTGCCGCCAGAACCCACTATGTTGAAACCTATTCCAAACTTGGAATTTTGAATTTTCTATAAACTTCTGAAATATTGAAGCATATTGAGAAGCAATTTTGGAGACGTTGGGGCAATCCACAGGCTCCTCGACTGCTG
>c17874.graph_c0
ATGAATGTATTACTTCCATTGTACTCTATTTTTTCAAGGGTTATATATAAGGAGAGTCACTTATGATATGGCACTACGACTAATGTAGTAAGGTAATTGAAAAAAAGTATGGAATAAATAAAAGATAATAAATAAAGTATAGTAGTAGGAAAATTTCTGGCATCATCCGAATTGCGTTCTGCCAAAATGGTGTAACAAACACCTATATTTAGACATATTAAATTTAGTATAATCATCGGCGACTTTCTATTGTTCTTATTCTTAGTACACTCTATCAGTCTTTCGACATACATTGCAGCTTCCATTTTTCTTATGAGATGTGTAAAAAATTCCGTGAAGAGTGCCCCG
>c17898.graph_c0
AGAGGGAATTTTTAGGAGGGTTCCTACCAACTCATATAATGGGCATTCTGTTATTATATTAAGTGATTATGTTATTGGGCATTCAAATTTTACTCACTTTAATTTAGGTTAAACAACTTTATTCAGAATGTCGGGTATAGTCTATATAAATGTACGCTTTGTACTCAAAATCATTAGTAATTTATTATAACTCAATCGGTAAATTAAATGAAGCGTTAAAGAAAAATAGCGCCTTCAACTACAACATTGTGACAACAAAGTAAAATCACTACACAAGCTTTAAAATTCACAACTAATACATAACATTGTTTGCGTAGTTG
>c17913.graph_c0
GTACGTTTTACTGTTACACAGTCGGCATATAATTCCGCTTCTCGGTAGATGTTAAGCAGTAATGATAAAAATTAACAGAAGTAACATAACGTCCGTAAAAACAAACCTCCGCAATTAATCTTCGTAAAAATCATATTTCCCTTCCAGTTTTCACTAGAAATAAGTTATCACGGCTGTGGCGACATCGGTTAGTTATTAATATTACGAATAATAACATTACTACATAATATATTACGTTGAGCACATTACACGAAAGCAAAATGTTTTAGCGATTTGTATGACAATGTTATTAGTAAACATGCAATTTGTACAACTGTATAAAATGTATAAATATCTCGTACAGACTCGGGTCTCTATTAGTGCTGAAAGAAAACCGAGTACGTACATACACTACTGCAGAA
>c17926.graph_c0
GGTGGCACTGCAGTTGAGTTTTGGGATTTTTTTTGTCAAGATCAATCAAGAAATAACTTACCTGAAATGTATAAAAAGAACTATTGTAAAACACAACTGTAAAACTAAATGTAATATTAAATTACTCAGTTACTTATGGTTTTGTGCATGATTCACGTAGCTTTTATGAGTGCAAGACTACATCTATGTATGTACAAGACAACTTTCATAAATATCAACAATTATACGACATATAATGTATGGTGTGCACGCAGCTGGCTATCTATACAGTTGTTATATGATACAGTTAGCATGGAAAAAGTATATATTTGTGAAGTTTTTCATGATTTCTTCCTTCGTATTATGATGAACAGCTGAAATTATAAAATGGCGGATATATAGCTTACAGCATGAGCAGTTGCTTAGCTATGACAGTGCCGAATAATAACCTATCGTTTTTGCCAGAGCAATTTTAACTCATCCATCATTGGCTAAAATGTAATTTTATTAGTAAACAATATATGTTTTCAATTTGTTATAT
>c17938.graph_c0
GATCATTCCAGCTTCCTCCTGCAGCACTCGGGACATTCGACACAGCAAGCGTCATCATCTGGGTGCCGCTCTACGACCGGTTCATCGTTCCCTTAGCAAGAAAGTTCACAGGAGTAGACAAAGGATTCACTGAGATACAAAGAATGGGAATTGGTCTGTTTGTCTCTGTTCTCTGTATGGCAGCTGCAGCTATCGTCGAAATCATCCGTCTCCATATGGCCAACGATCTTGGATTAGTCGAGTCAGGAGCCCCAGTTCCCATATCCGTCTTGTGGCAGATTCCACAGTACTTCATTCTCGGTGCAGCCGAAGTATTCTACTTCATCGGTCAGCTCGAGTTCTTCTACGACCAATCTCCAGATGCAATGAGAAGCTTGTGCAGTGCCTTGGCTCTTTTGACCAATGCACTTGGTAACTACTTGAGCCCGTTGATCCTCACGCTCGTGACTTATTTTACAACAAGAAATGGGCAAGAAGGTTGGATTTCGGATAATCTCAATTCAGGTCATCTCGATTACTTCTTCTGGCTCTTGGCTGGTCTTAGCCTTGTGAACATGGCG
>c17944.graph_c0
GCCGCCTCTGCTCGTCTCTTCCAAGTCTCGAATTTCTCTTCATCAGACATCTCATCATCCTTTGCAAGCTCAGTAGTCTCATCAACAATGTCGTCGTCTCTCAAACCAAGCCAATTCCCATCATCATCAAAGAAAAACCTCTGCCACCAGCTTCTTCTCCTCTTATTATTATTACCCGTATGACTGTTATTCTTCTCCGCACTGGGAACAAATCTCCAAAGCTTCTTCCTTCTCTTACCCCACAACGAAATCGAATCACAAGGCTTATAACGAAGAAGAGAAGATGATGATGATTCAGGATCTGGGTTTTGACTACTGAATGATAAGCAGTGGCATAAGACCATTG
>c17975.graph_c0
ATTTCAAAGAAGGAGCATCTAACACAAGTCCTGAAATTCCACCAGAAACTTCAGATCGGTCAATCCCAGAATACTTTTTTTTTCTTTTTGGGAGATAAGATAACTTCTTCAAGCAAGGCAGTATAATCTTGAAACTCAACGCGCAGGAATCATAGTAACCTTGTTGTATGAACAACTCTTCAAGAACAGGACAACTGGCTAAAAGTCTAAGGAGACAACTGGCGTTGGAGTAATTCATATCTCTGAGCGATAAAGTTTTCAGAGACCTAAGACAAACGAGATCAGGAACATCCAAATAACCTTTCTTCAATTTCAAGACCACAAGTGTTTCACAAGTGTAAAG
>c17980.graph_c0
GCTAAGTACTCTTTGTTTTTGTTTTCTCAGAACAGATGAAACAATCTTAAAGGGTTGTTTCGTTCATCTTCTAGACTTCTTTTTTGAGGCCTTAGAGGAAGGCGCAGGTGCATTCCCTTTAGAACTGGCCACTTGGTTTGACTTTGAAGTTGAAGGAGCTGCTTCTTGTTTATCCTTGGTCACCGCACCCTGCGAGCCACGGATTTGAGCTGCTCGCTTGTCCTTCCTCTTGGGTTTGTAACTTGACCTTTCCCTTCTGGGAAGCCACCTTTCAGGGTCTGGGGGTGGACCTGGGTTTGCCGGATCAAATCCTTTGGGATACTTTGGCTTTCTCTTCCTCTTCCTCTTCGCCTTTTCTTTCTTCACTT
>c17980.graph_c1
CGATGAAGCAGCAGCGCCTTCAATGGGTTTTGCACCATAGGTCTTTTCTAGTTTATCCACATCAACAGCCTTCAAACCTGGTAGGGGCTTAAGCTGTTTCTCATAACTTTCTGCTTTCTCAACATTGACACGAGCAAGTGTAGTCACAAGACCAACCAGAGCATCTGTGCTATTGTGGTTTTTCACAATTTCCTCGTATAGCCGTGAAGCCTCCTCTTCTTGACCATGCCTTAGCTTGAAGGCAGCAGCCTCTGGCATCAATACCCTAAGCTTACTGCTCTCGGTCATCGAATTTGACCACCATTTAATTGCTG
>c17984.graph_c0
ATGCGATTATTATATAATATTTCTATTAAAACAACTAACTTAAAAATTTACCGGGCAGTCATTAAATTTATTTATTTTATTGTGTTTCATAAGAGACCAGAGGAGATACTCAACACAGGGGAGAGATTAGATGCACAGCGTAGGATTCGGGGGAGATTTTAATGTTGCTTTATGGTAATTGAATTTGGAATTGTAAAGTTGTTTTTTTTTAATTCAAAATACAGTTGAATAGTTGAATAGTTGAAGTCCTAAAATTTTTCATTAATATAAATCAAGATATAGTAAGTCAAAACCAATTGTCGAATATATGTTAACGTATCACTCTAGAAAAGCTGCGCACCTATTTGGCAATTTTTTTTTGCTGTGTTTCCAATTGTCAGGACAAGGATTATATGAAAATTAATGTATGACAAATCGTAAGGAAAAGAAAACAATTTGGGTTGCAAAATCTCAATATAAAAATGTGAGACTGAGAAAAATTG
>c17986.graph_c0
TTTAGGGTTCCGAACGAAATGGCCGATGTTAATCTTCCTCCGTCTGATTCCGTCGATAACCGTCTCCCTGAGAAATCAACCTCTTCCTCACCACCTCCTCCACCGCCTTCTTCTTCTCTGCCGCAGCAGGAACAGGAACAAGACCAGCAGCAGCTTCCGCTACGCCGTGAGAGAGATTCACGAGAGCGTCGTGACGAGAGAGACATCGAACGTCCTCCGCCTAATCGCCGTGAACGTGACCGTTCGCCTCTCCCACCGCCTCGTAGGGATTACAAGAGACGTCCTAGCTTGAGTCCTCCGCCACCGTATAGAGATAGGCGACACTCTCCTCCTCAGCGTCGCTCGCCTCCTCAAAA
>c18012.graph_c0
AACATTGTTTTAAAATTATGGATACATAATAACTCCTTTATGTTGATAGTGATGCTTACTTCAGTTGAAATTAAATGTGTTGATTGATGGGTATTATTGTTATATATCATCTTTTTAGGTACGACATGTACACTCGAATCCTGAAGCCCATAGCCTCATTGATAGTAAATACCTAGGGACTTGTAGCCTCTTCCTCTGGTTATGGTAGATGCATATTACTTAATCTTAATTATAGTGAATATTACGAACTCCATAATCGTGATTTACCTTATGAAGCTTCATTGAGTTATCTATGTTTATTCTTCTTTATATTATCTCCTCTGTTTGTTTCCCTTACAATGATTTTATCACGAAACATTATACAATAATGAAATAAGTAATCTGTTAGATGATATCTACATGTAATTTAGGTTTAAATATAGTGCTGG
>c1802.graph_c1
AACCATTCCCTCAAGCTCGAAATGGTTGATTCCTTGTTTTCAGGACTCGATAGATACATAGCAAGGAGTTTCACTGCCTGTAGAGGAGTAGCAGCGGCTTCATCGATCTCACTGATGACAAGCTGGTAACTTCCGAGAGCGATGTAAGCGCGATGGACGAGACAGTCTCGCTCGACGATATCTTCCTGCGAAAGATTAGGGATCTCGCTGTTGTTGATCGCAGCTTGATAAGCACCCAAGTAGAAATGGTTTCTCAAATTGAAGAGATGATCTGGTCCTGCCATGGATGCCATTGTCTTAGCTTCTTCTTCTTCTTCTTCTTCTAGACGATCCTTGTGTTTCTCTTGCTCTCGCATCCACGCTTCTCTGGTAATGCTACTGATCGTCACCGTGAAGCTGAGCTTGATCGCTTCCCCTTGTGAACTGATCTGATCTGAGAGTTGTTTCTGTTTCGTAATCTGTGAATATGCTGACCAAGTTCGAGACCAAGAGTAACCGAGTTAAGGGTCTGAGTTTCCACCCTAAACGACCATGG
>c18022.graph_c0
TAAGATACAATGGTGAAATAAATTGAATTAGTTCTTAAACTTATTAGTTCAGGCCATATATGTCAAAATATAAAGTATTTCATGGTACAAATGATGAAGTCGAAAATTTAAGATTATATACGTATTTGCTAGTTAATATATACAGTAGTTTTAGATGGCCTTAGAAGTTGAGTTTAGAACAGTGGACTTGAAACTCGCTGGAACTTAGATTAGCGTTAATCTGTTTACACTTAACGAAAGTACACGAAATATGTGGCGTAAATATGAAGCTATGCTACGAGTAATAAATACAGTAGAACCCCG
>c18031.graph_c0
TCCCTCAATATTTTTCTTGAATTCCTCTTGCTTCTCCCCCTCGAGCTTAGGTGTCAACAACTTGATGTATCTCTTCATGTAAGTGACAAACTGCTTCTTGTCAAATGGTGGTTGCTCCTGAAGCCTAAATGTGTCGACAATGTCAACCACTTTGACAGTTTGATCATCAACACCCTCTTCTTCACCACCTTCAGCCGAAGGATTTGCACCAATGTCTACATCAATGGCTCCTTGAACAACCCACTTTCCTTCAACTTCCCAGAGGGCTCCATTGAAGAGCTCCTTGTATGGGAATGAGTCGGAAAGAAGCTCATCAGCGGTGAGCAAATCCTGATAGACAAGCATGGTGGCAGCAAAATCTCTCTCTGATCGCTCCAAAAAGCAGAATCGAAAACGCAGGGAGAGATGGAGCGG
>c18035.graph_c0
GTTCTTAGAATATTTAACAGTGACTTGAGCAGTTGTCGGACTTAAATGTATCCATTGCCTTTATATTGTTCGGAAGATATAATTTAACATGAATGGTCTCTTGACTTACGTATATTCATTTTTTTAATTTATTTATTGTGACAGTAGGTCATAGTGTTTGTATGAAGAAAACTGAAACTGAACTTGTTACATTTCCTTAAGATATGTCTATGTATCACTATTCTTTGAGAAATCCAGAGTGTGCGAAAAATTTCCAGAATTAATAAGAAGAAAGTGTGATGACTGGTTAAAATGAATTAATTATCTTTAAATATATCCTCCCTTGGC
>c18039.graph_c0
TTTAAAATGCGTCGACTATAGTAATACTTAATTCCATTTTTAATTTTTCTTAGTTTCCTATGATGGCACAACATCTTAAGATTGTAGTTAAAACATTTGAAACAAATCGAAGCAAAACTAACGAAGATATACAATTTTAAGCGTCCGGTGATCCGATCGGGTTGTGTATACTTGCTCAGTAGCTGTCCGGTGCAGTGTTCTATATTCCCTTCAACATCCTTTTTTTCATATTCTTGGGTTTTTGTAGGTATGTATATTAATGTTCTAATATATTCGCTCTGTAGTATATATACATTAGTTTGGAAATGAAACTTGTACTAATGTAGAAGACGCTGAAGCGAAAGCTGTACATTTTTGTTCATAGTCGTTCTGTTTCGTTCGA
>c18049.graph_c0
TGCAATCGCGTCTCTGTTGACACAAGCAACCAGCGGCGCCTCGTCACGATACCCGTGATAATGAACATCGCTGCACTATCTATACGGGATCCCAAATATTTAATGGCGGGTTGTACGATAGTGGAATGCAGCGGCAAGCGTAGTGGAATGCAGCGGCAGGTGTAGTGGAATGTAGCGGCAGGTAGGTTTCGTATCACACCAGTATTCCAATAAATTATTGATAATTTACTGATATATATAAGGTAGTACAACACGAGACGTTCGTATATAAATAAGCTCAATCGAACACATGATTATTTTTGAAAACCTATAGTCGCCTTGGAAA
>c18061.graph_c0
GATCAAGCTGGAAAAGCTTATCTAAAACTTGCCGACTGTCACTTAAAGTCAGATAGCAAACATGATGCTGCTAACGCCTATGCTGAGGCTGCTAAATGCTACAAGAAAGTTGACACTAATGAGGCTGCGTCTTGCCTAGAGCGAGCGGTGAATATATTTTGTGAGATAGGAAGGCTCAACATGGCTGCAAGATATTACAAGGAAATTGCTGAGTATTATGAATCTGATCAGAAGTTCGAGCAGGCTATTGCTTACTTTGAAAAGGCAGCTGAATTCTTTCAGAATGAAGAAGTGACCACTTCTGCAAACCAGTGCAATCTAAAGGTTGCGCAATATGCCGCCCAGCTGGAGCAGTATGAGAAGGCAATCAAGATTTATGAAGACATAGCACGCCATTCACTCAACAATAACTTGCTCAAGTATGGAGTTAAGGGCCATCTTCTCACTGCTGG
>c18062.graph_c0
GGACGGTAGTAACGAGTTTAGTCATAGTAAGTATGCTGCTAATTCTGAGAACTGCTGTATTATATTTTTTCTTCTTAATTGATAACTGGTAAATTATATCTGGGTAAAAAAATTCGCAACGTTTTACGTTTGCCGTATAGTGTAGCTGTGTAACAAGCTCCCGGCTTGCGTGGTCCTTCCTTATTATGACATGGGGTACTTCAAACGTAATCTGAAGATACATTTACACAAGTCGGCATGGCGATGGATAGTTTGTCTCTTGGCTGTTACCGTTGTTTTGGATTTTACTGTGTTTACCACGTCACATAGTGCAGGCACTAGAACTGATTCCGCATATATTGCATTAAAATATACCTAATTTATAAATATTATGCATATATTACATATTTA
>c18069.graph_c0
GTCGCCGTTATTCGAACACAGAAGTGTGTTCAGTATAACGAAATAATTAATTTTCATTACATATATTGAAGCATATGCCAATTATTAAAATCTATTACATTAGAAACTATGAAGTCAAATAAAAACTAAGTAATATAAAACGAATTTTATAATACCCTTATATTTGCTTCACGGAGAGAAATCCATTTACATTTGCAAAGTTTATATACCTACTAGTTGATTGGACATTTAAAAATGGCATATTGTTAATCGAACCCAAAAAAAATTGCCTAGAATAACCTACGAAAAATTTCGCATCGAACGCCGGTATGTTTAGTAGTTTTGACGTCATCAAAAGAACTGTATTTTCATTATATATATAAAAGAGGATATATATGTATAATATATA
>c181.graph_c0
CTTGAGATTAGCGACCCCTAACGGTATAGTTCCGGTTAGGAGATTATTGCCGAGTTTGAGTTGAGTTAACAGAGTCAAATTAGATATCGAGCTCGGGATCGGACCGGTGAACCGGTTTCCCTCGAGGCTGAACGCTTCAAGCTGGCTTAGCGCACCGATGTTAGCCGGAAGAGTACCAGAGAGACGGTTATTCTCAATGTATACGTACTTAAGATTTGGTAATTGGAAAAGGAATTGAGGAAAAGAACCAGTGATGTTCTTGAGATCGGTGAAGTAAATCCCATCAAGGTGCTTGAGTTTAGCCAACGACGGCGAGAGAGTGCCGGAGAGGAAGCTTCCAGCAACATCGGCTTGTCCAGCGACAGAGAGTGCAGAGACACGGTCAGTGGTGAGACAAGTGACACCGTTCCAAGAACAACAAGCGGTACCTTTCTTCCAAGAACTGAGAATACCCGAAGGATCTCGGGTTATACCCGCTTTGAAAGCTAGAAGACCCGCTTCATCATCAGGATGACACGTGGCAGCTCCGGTGGGATTTAGACATTGGAGGAAGAT
>c18105.graph_c0
GTCCATATACGCACTAAAGAGAAGGAATGATGCAAGTGCAGCAGATCCAATGGCAAACCCTTTCGTTGTTGCTTTTGTGGTGTTCCCAACAGCATCAAGAAGATCAGTGATCTCACGGACACTCTCTGCTGGCTCATCTCGACAATCCCACCAGCGTTGTCAGCTATGGGGCCAAACATGTCCATAGTAAGGACATAAGCTGCAGTGCTTAGCATTCCCATTGTAGCAACGGCTGTTCCAAATAGACCTCCAGTGGGAATACCATTTTCGTCCACTAGACCCGAGGTATTGCCCAACCAATACGCAGAAATAATAGCTACACTTATA
>c18110.graph_c0
ATACAATATGCAATAGTTAGTAAACAACGACTTCTTATGAACGATGATGTCATTTTTACAAGTGTGCATTGATTAAGGTTTGAGTGGGCCTACAAACATTCTATTTGAGTACCTGTACCATATCATGTATACGCTTGTTAAATACTTAGAGTATGTAGTCATATACAATACTATTTTATTTTCTGATTAGGTTTATTCTACAGTAACTTCGAACCGCACTGTTAGTGTTTCCATTGGTTTATTCATTCTTAAAATTTAAGGGAACTTAAAGAAGTTGTAATTATAGAAATAACTAGTACGAAACTGGG
>c18134.graph_c0
GGGCTGTTGTGCAATTTGCTTGGATACTATACCTCTTCAAGAAACAGCTATGGTTAAAGGCTGTGAGCATGCTTACTGTGTGACGTGCATACTCCGTTGGGCAAGTTACAAGGAGAAACCTACCTGCCCACAATGTAAGCTTCCATTTGATTTTCTCAATGTCCACCGCGCTCTCGATGGAAGCGTTGAAGATTTCATGTTCGAGGAGAGTGTATGCCTCCTCCTGAGGGCATCATGGTTCCAGCCACTGGAAGCAGTGGAGCGGGTTTCAGACAATGACAATTTCAACTATGATTTCGACATTCCACCTGAGTATGAGGAGG
>c18162.graph_c0
GCGGGCGTCTCGGATATTTTTTCTTCCGCTTTTCGATCTTTTAAAGCCTTCAAAAGTTTCCATTTACTACCGACAGGAGCTTCTTGCGTTGCAGGCGCAACTTCAACTGGAGCAGCTTCTTGATGAATTTGAGGCATATCATAGTCTTCATCAAGTTCGTCTCCACTAATTACTGGACTATCGGGTCCTGATGTCTCGCCTGAACCAGAATCATAAGATTTATCTTCTTCGTACTCTTTATCATCATCTGTAGTGTCAACAGATTCTTCAATGGCCGGGAAGGTTGTTATATCTTTCCACGTTTCTCTAATAGGAGACTCATCGTACTTATTTTTTGTTGTTGCCGTTTTTAATTTCAATTCTCGGAGTACATACGACATTTTTTCTTTCAATACTATTTCGGGTTCATCAGATTCTTCCTCGATTTCTGGCTCTTCGGGCAAAGTTTGCTGTCTTTCAG
>c18182.graph_c0
AAAAAGTCTCAATCTCATCCCATGCAGTTCCCTCGACTTCGGAATCAACGAAAGGTGTTGCATGGTTTAGTGTGTCAGGCAGATCTTCTGCAAGTGCAGCATAGGCATTGATCTCTCCACGGCTCATACCTGAACGAGCATTAGGGATTAAGCGGAATGATCCCTCCTCGAAGCCATCAATCTCTACCCTTTCGATATCAGCTTCCGGTGACTGGTCAGCTAATTTGACATGATTGAGCATTGTGGCTGATGGTAGCGAAAACATTGTGAGTAATGCTCCAAAGCGATGGGAATCCCTTGCACCATTACTGAGAACAATCCGTAGGCAGAATAGAAGAAGCCGGGATCTTAGCTCTGGGTTATT
>c1820.graph_c0
GCATCCTTAATTTTTGTATAACGAGAATAATTGTCGAATTAATAGCAAATAGAATACGGATTAAACTTATCCCGTTGTTTATGTCTTAAACAAAATTAACTTTAATACAATCATCTACTTTTTATACTTGGAACTGGAGAAGCGGACCACGATCTTCTAAACAATTTGTTCGAATTTTGGATGGAAAGTAAGTATAGTTCGAAAGCATCTTCATGTTTTGGAGGACTTTTCAGGCCCAAATAAGGCGCGCTGTATTACAGCTGTCGAAGAAAACGTTTACTATTAAACTGCTCTGTAGTCAAATTCGTGCTTCCGGAATCCCTACTGAATACTTGCACGAATAAAAATCTGTGCTATTGAGGGAGTAGAAGGTTTATTAATAATTCTCAGTTTCCCTAATAACTCGCCCTTTGCATCTATGATCAGAGATTCCCAAAAA
>c18203.graph_c0
AACAGAACAGACTGGCTTACCATCATTAGCTTTGTGGTTGCGCTACTTGCGATGGTTATCGCGACATTTTCGACAGGAATAGACTCCCAATGTTTCCAATTTAAGAAAGATGAGAACGATCAAGAAGAAGAAGCTGAAGATGATGTTCCATATGGCTATGGATTCTTTCATTTTGTGTTTGCCACAGGAGCAATGTACTTCGCTATGCTACTCATCGGTTGGAACACTCATCATCCCATGAAAAAGTGGACGATTGACGTGGGATGGACAAGTACTTGGGTAAGGGTTGTGAACGAGTGGCTTGCGGTTTGCGTATACATTTGGATGTTGGTGGCTCCTCTCATACTAAAGAGCAGAAGACAAACGCCAACTGGGACTTGATAGGTAAAG
>c18219.graph_c0
GTCAGAGATAATAATGATTAATTTTACTAACGGATATAGCAATGAAAATCAAGATTTCCACGAAACACCTAGGATTTGTTTTATCACACGTAACCAATTTGGAAAACAATTGATAAAATGCAGAAAACATGACTCATGGAAGTAAATTATTCAGAGGTTTCTTCGATGAGTCACACGATTATCTCTTTCGTTCACGTGTGAAAGTTATCGCCGTCCTATTCTACCGGTTATCAAGTGTCTATTTCGTTCGCACGTGGAGGCGCGCGCTTTTTTATCCTTATTCCACCTGTTATGTAGGACAAGAAAGGTTTTTTATTTTATACGGGCTATTTAATGTACATTTCTGAGAAAGTTTTGTTGTTTTAATAAAACGGAAACTTTACAAGGAAAGTAATTAATTATTTGGACCTCTGCCACGACCGTACTCATGATAATTTATGTTTTATAGTTATTTTACATTAAAATGTCATTTTATTTT
>c18226.graph_c0
ATGAATTAACAGTGAAAGAAAATTCAACGAAGCACGCGAAATGTTCTCATGAACTTATCATCAGAAACATTAATATCAAAGGGACGCATTCAAACGTCGATTGAAGAACAACGATAAAATATAATGCAAATTCCTAATCATATGTTACGTTCAATAAAATCTCAGTTTGTTTAGAACTCGTGAGTCAATCACCTCGCAGGGAAATTTGTTTAGCAGAATGACGTTACTAACATTCCTTTCTAGATTTAACAAGCATGACTACACTACCTACGAGACATGTCGCGTCGTAAATTCAGTCTTCTTAT
>c18229.graph_c0
CGACACAGATCACTTGGCTACTTCCAGGGCATGTTAATGGTGTTATTGTAAGGTCCTCCAGTGCTCTGATGAATAGGGCTTCCATGTCCTCCTCCACAAGATGACTCACTCATTGTGCCTCGAGATTGTGGGCTACTTGGAGTCATCAGCACCTGCGTTGGGGCCACACGCGGTAATACGGGTGACGACAGTCCCATTTGTCCCACATGCTGTTTTGGTTCTTTTTCTCCGTCTGGTAAGAAACTCCCAACAACAATCTGAACAGGTGATGCTGCTATAAGAAGACCAGCTACACTGCCACCGAGGACATTACCATCCGGACTTGATAATGACACGCTTAGACCTCCCGTCCTGCTTCTTTGACCATTGTTCTCCAGCAAATGGAAAG
>c18251.graph_c0
TCACTAGAAGGTGCAAAGGAAAGACTTCACTTGTTCAAAGCAGACCTTTTGGAACAAGGTTCTTTCGACTCTGCTATTGATGGTTGCCATGGAGTTTTCCACACTGCTTCTCCATTTTTTAATGATGCCAAAGACCCACAGGCTGAACTTATTGATCCTGCGGTCAAGGGGACGCTTAACGTTTTGAATTCGTGCGCCAAAGCCTCTTCGGTTAAGAGGGTTGTTGTAACCTCCTCCATGGCTGCCGTTGGTTACAATGGAAAACCACGCACACCTGATGTTACCGTCGATGAAACTTGGTTCTCTGATCCTGAG
>c18264.graph_c0
CTGCATTTCTCCCTGTAGAAACCTTCTTTCTTCAAGCCATTGCTTCACAGGCATCACTTTATCATTACCATCTTTCCATTCATTTGCAACCACTGTCGCAACTCTGTTTGCTGTAACCTTTGCACGCGCAAGTTCCCGGTCAAGAGTTTTTCGTTCTTCCTGCAAAAGTAGAGCAAGAAATATTCCTTCATCAGTTGAGTAAAGATTCTATACTTCTTTTTTCGGAAATGTATTAACTTACGTTCATCTCTTGAAACTTCCGCTGGTAATCCCTCACGGCATTTGCAGCAGCACCACCAGCAAGAACGGCCTCTTCCAGTTCCCGTACAGTCTGAGTAAGCTTTTCCACCTCCGCAACCTTTTGCCTG
>c18270.graph_c0
TGGGCTGTAGACTACCGGACGAGCATTGAAAAACGACTTTTTCAAAAGCGCAGAAATCATAAATTTTTTGTTGAGTTATATTACTGGGGCTATTTTATTCATGATGCCAATAAATCTATACTGACCTTTGCTATAACAATTGCTGTGGCAGATTGATTCTAAATTAACAAAAAAAAAACATTCAAAAGTATTATTAGCCAATTCACATTCCTTTATTTGTTACAAAAGCGAAACAAAAAAAAATCAACTCACGTAGTACTGTGCAATTCAAGTGTAGTAAAATCAACGATTTCCGTAATGGGATTTCGGGCAGAAAGCCGTTCGCAGTTAAGCTGATTTGCCGCAGATCGTCTATTAGCCGGTTTTGGATCTCGCTGTAATTTGATAAAAACTAACTTAATTGTATCTGAAATACAATTACGTGGGATAACGTAG
>c18272.graph_c0
AATCGCGACTTGTAAAACTGGCAACGGTTGTCGTCGCTCAAACTGGTTTCCGCGTAAATTCGCGTTGCCAAGCGATGCATCAACCAGAGTCGCCAGAGGTAAAGCAAGGAGAAGCGGAGGGGGGAAGGAGGTAGGTTGGAAACGCAGGAGGCACGAACAACGGCGGTCGACGACCCCCGCAACTTGCCCTGCGCTGCCGCACCATTCGCCTCTGCCGCAGTCAATCCCGACACGATTACTATAACGTTAGCAATATCGTAGAAAATGTCAAGGGTACAACATATAACTGATATTAAAATATCAAAGAATAATCTCAATAGATACCGATTTAAAGTCATCAAATGTAACCGATACGAAAATTACA
>c18306.graph_c0
CAAGTGTGTGTGATGCAGGATTGTGGTCTAGAGAGATGTAGGTAACTCCCGTTAAAAACGATCAAAGAAAGTGATGAGGGGTTATTCTAGCCTAATTGATCGATGGTGTTTTTCCTTACAAACAGGTCAAAAATTAACAAAACTTTTTAATTTTGAACATTGGACAACATTCTAAAGGTCCGTGAGACGGCAGTAACTTTTCCGTGTTCCACATATCTCTTTCCAATTATCATATTATTAAGAAGTATATCGGGTTTTCGGTATAACATTTATTAAAACTAGTCGACCTTGTTAAATGGGAATGGCGCATACCAATTTGCATTACTATATCATTCTATGTGAACGTGTAAAGTGTTTTATATAATTATGCAAAAATTTGAGAAACCTTTACA
>c18324.graph_c0
GCCGCTGCTATGGCAACTGAAAAGTTAACATTAAAGTGCCATTTAAAATCGATGTGATCTGCTATATAATTTTATGATTCATATGGTAATATAGCTTGGTAATTTTGTCTTACATAATTATTATTTAAGTACTCAACTCCATGGCGTTAAAGTTAAACGCGTGGCGATAATAAAATGGTTTGTACCAGGCTACATCGCTACAATCATGCACTATTTTATTTATTTATTTGAAACGGATATCCAACAGGGGTACAATGTATTTCAATAGACTTAACGGGTGTTATGGGTATTGGAATTATTGTGTTAATAATTATAGTTAAACACAATACACTAAGTTAATTACTTAGTTACTTTTATGAATAAGGAAATTAAAACAGGAATTAATATGAGAATTAATGATATCAAATAACTAACTATATTATACTAGCGGGCCCGACGGACGTTATCCCAACCTGATAATAA
>c18329.graph_c0
TTCGCGAGAGATTTTTTTAACTTCAGACCGGTATAGTATAAGCTTGTGTGTGGATTATAAAAAATGTTTTGTGATATGGCTTTATAACACCGTTATTTTATCATCGAAATATATCGTCGACAAGCAAATGTATTAGATTACTTCGAAAAAATTACAATGCATGTAAAATTTATTACCTCATCTATCCCATTTACCATTAATCAATTACACGTACATTCAGTCATTCAATTAAAGAAAACGATATATATAAAATATATACGTAAAAAAACACGCATCCAATTTCATTTGCATTCTTTACCTGTGATGTTAG
>c18345.graph_c0
AATCAAAACCCCATCTTGGCGTGTCCTTGCTCAGATTTGATTTCTCAACAGAGAAATCATCTCTATGTGTGACTCTTCCCTATCAGCGTCCAAGGTATGAAATTTTGAGTATTTCCGCCGTTAGAGGAGGAGAGAATCTTTCTCTGTTGTTGCAGCTCGATTTTGAATCTAAGACTGAGATATGGGTGACGAATAAGATTGATGACACCACCACCAAAGGAGCAGCAGTCTCTTGGACCAAGGTCCTAGCATTTGATTTAAGCCCTGATCTTCAATTATTTTCGGAGGAGGTAAATTTTTTGCTTGACGAGGATAAGAAAGTCGCTGTGTGTTGTGAGAGATGGTTGGAACCGCAAGAGCACCACAGGTACCAGTGCAGGAGAG
>c1835.graph_c0
GGATGCATGAGTATGAAGGGCAGCTCCGCGACGAGCTCTCCGCTGAGCGCGCCCAGGTACAGCTTCACCTTCACGCTGTAGCTGACCACGATGCCGAACGCGTCACGCTGTTCCGGATCCAGCAGGAGCGTGGTGGAAGCGAGCGTGGAGTCCGCGCGCTTCAGCTGCCCGTCGAGTGCGATCCCGCGCTTGTCTCGGTTCGAGGCGAGTGCCGGCGTCAGGTACAACACCTTCTGGAGACTGGAACCCGGCTGCAGCGGGCACCCATCTCTGCGGATATAGGTAATTATATTAGAATTTTTGTAATTGGGCTCGTGCCTGCGTGCGTGATATCTCAAAAGATCTCTTCTCTGGAGGCGGATAGATCTGCTCG
>c18373.graph_c0
GTTTTCCATGATCGTCCTAAAATCAAAACACTAGATGGGGACTTAATACTAGAACCCGCTTTTGATAAAAATATATATTTATTACCCAATGGACCAAAATCAGCTGTTTACGTCGGTGACACCAATGTTCTCAAGATTGCGTCGACGGAAAAAAATGAAGGGTCTCTACCTTCCACCAATACTAAATCTATTGAAAATTTAAATGGCCCTGATGGATTAATGCAAAGAATCGCTCAGTTGGAAAACGTAAATTCATTCATACGTGAAGATTTTACGCTCAATATATCTCGACTTTGGAGAAAGGTA
>c18379.graph_c0
GGAATATTTACAAGAATTGCACAAGTTGCAGCTAATGAATTTAACATACCAGTTCATAAGGTTGCTGTACTACCAAGTCAAAACTTTGTGACTCCTAATAATTTTGCCACAGCTTCAAGTATTACAACAGAATGTTGTGCATATGCAGTGATAAGATCTTGCGATCAGATCAAGGAAAGATTAGTTCCAGTAAGAGCTTCGATGCCTAAAGCTAGTTGGGAGGAGATAATATTCGAAGCTGACCTTAGAGGGATTTTACTTCAAGCGAATTATCAAACAAGTGAATATGATCCAAGAATGATTAATTATTCAATATTCGGTA
>c18379.graph_c1
GGTTCAGAGAGTGTTTTAGAACCATAAATTCCGACGGGATTCACTGATCGCCGTCTCAAATAAACTCGTAAGTCGTACGGTATATCCAATGCTCCCATTATTTTGTAGTTCCACGTACGATCTGTATATATTTCTCCTGTATCTTCGTTATAAATTGTATCTTCCATAAGCCATACAGACAACGACTGCACAAATGCACCTTCAACCTGACCAACATCTAAAGCAGGATTTATACTTCGACCGCCGTCACCCAGTACGTCCGCTCTAACAATCCACTTTGTACCAGTTAAAATATCAACTTCTACTTC
>c18405.graph_c0
ACGAGCGTAGTGTCTCCGCGCTGACATCATACATTGAGAAGTTGGTCAGCGAGGTGGAGGCACTGCGCTCGTGGGTCGAATACGAGGTATCCGAGCCCTTGAAGGCGGCGCGGGGGATACGCGAAGGAGTGTAGGAGCTCTGTCGTCGACCGGCTCCCGCCGCAGTTTCCCAGTTGCCGGTAAAGTGGCATCTACACCCGGACGACCTGGAAAAGATAGTTGGCGGCGCGGGCCGACTCCAAAGCACGCAGACGCGCCTCGAGGTCAAGCTGGAGGAACTCCCTGGGCTCGTTGCAGAGCAGATACCGGTTGCGGTG
>c18409.graph_c0
GGTGCTCCCAGTACTTGTAAATAAAATCAATTATATTTGATTTCATATTTAATATAAAATTATTAAGCATTAGCTTTTAATCTTATGGATTATTTTGTATACAATTTAATTCAGCTTGAGTTCATTTTCTCATTGTGGAACTCATTATTTACACAGTTATCTAAATATATAAAAATCGAGTGTTATGACGTTTGTCTCCGAAACTAGTTAACGGATCTTCATGAAAGTTGACATTATGTATAATTTGTTCCAATTTGAGCCATTATCCCTTTTTAACTACAAATGATTGTTGATGTTCATTATTATTAATTGTAAGTCTTATTTTGATATGTGGGTAAAAGGTATGAATACTGAAATGACATTTGAC
>c18412.graph_c0
ATTCACGACAGTTCTTGGAGGAAGCGAGGTCGGTTGGTCAGCTACGGAGTGAGAGAATGGCCAATTTACTCGGATGTTGCTGCGAAGGTGACGAGAGGTTACTTGTAGCAGAGTTTATGCCTAATGAAACACTAGCCAAACACCTTTTTCACTGGGAAACTCAACCTATGAAATGGACTATGAGGCTACGAGTTGTTTTATATCTAGCACAAGCTCTTGAATACTGCACCAGCAAAGGCCGTACTCTTTACCACGACCTCAATGCTTACCGGGTTTTGTTTGATGAGGAATGCAATCCAAGACTATCTACTTTTGGCTTGATGAAGAATAGTCGGGATGGAAAAAGTTACAGCACTAATCTTGCTTTCACCCCTCCTGAATATCTACGAACTGG
>c18419.graph_c0
GCACGCCATTATCACGTTCCATTTCCCTGTCTCAGCTAGAGCTTTAGCCGTGGCTAGACCTAACCCAGACGAGGCTCCAGTGACCACCACATTTCCTTTCCTCAACGTTTTCTTGCCGTCCACGGATTTTGTAACTGTAGGGCTTGAAGTCGCAGCGGTTTGGGCTCGAATTGCTAGATTCCTTAAGCTCTGTTCTCTCTTGAATCTTAACGAGGAAGATCCATGTTCGGATTTGATTTGGTCGGTAATGGAGGCACCAAAAAGACTCGAGTCCTTGAAAGATGATGAAGAAGCATTCAACTTCGCATCTTTGCGAACAGAGAAAGCAGAGGAGACCAAAGAAGCA
>c18421.graph_c0
ATATTAGGGACCATTCTCATGTACCACAACAACAAAGTTACGAAGAGTACTTCGATTCGAGTAGTTATCCATACCAGACGTATGTGGGGGACGACTCGAGGCAGTGGGACAGCGGGGGGCAATATTTCTACGACGACGGATACGGCCTTACGCCAACCGAATATGAGAATATTGTGAATAAGCGAAGATCGTCCGTCGTACAGTTGCCACAAGTGCCGCCTAAACAGTTAGTGATGTCCTCTCGATATTCCGACTACAACGAGATGGCGCCGTACAGACCACGGCAACGACGGACCGCGGCCAGTCTGCCAGCTACGCCTTCATCAACGCCAAAGAGGGGAAGAGCTCTACCGGTGCCTCCGGGCAGTGAGAGCGGCTCCATCCGGAGTGGTCGCGGCCGTCGCTTACCTCGACCTCCGACTGTTTCTCGACTACCGCAACCACCTTTGACGAGCCTCGCTCATCCTTACACTCCTGCTGTCCACACTGGCGCAGAACACACGCACGTGCCTTACGTATCTGAACCTGAAATAATTAGTGCCGACGTAAGCTACAGCTACAAAGGCTACGGATACCAAACTGGGTATCAGATCACTGCCACTGAACAACCTCAAGATAATAATTATAGTACAAGTTATGATGAAGATGGAATGCA
>c1843.graph_c0
TCATTTTCTTGCTTTCATGCTTACCACAAGTCGTGCACTTTTTGAACCATCTTGTTTAGTCCGGAAAACCCACTTTCAATCAATTTATTACCACTTGGAAGATCAGTCTCAACCCACACATTTAAATCGTTTAATGACTTAATTTCCTTTCTTATGGCTTCTTCCCGCTGAGGACTTGGTTTATTGCTTGTTCATAGCTAAGTGGATCATTTTCCATTACTAAAGCATATGCAATATAAAGTTCATAATCATCAAACTTGGCTGGTATTTTAATATTCCTCTTATTATATCTAACTTCTTGAAATGGTGTAGTGTCAATATCTCGTTCCATG
>c18438.graph_c0
CCAAAACGATGGAGAGCACGAAGATTGCTCCTTCATTCGATCGTGCCAGTGAGCTTAAAGCTTTCGATGAGACGAAGACTGGTGTGAAAGGACTCGTTGACTCTGGAATCTCAAAGATTCCACGCATTTTCCATCACTCATCTGTCGAACTAGCAAACCCTAAACCACTTCCCTCGGACCTGCTACATCTCAAGACGATCCCAACGATCGATCTCGGAGGACGGGACTTCCAGGACTCGTTGACTCTGGAATCTCAAAGATTCCACGCATTTTCCATCACTCATCTGTCGAACTAGCAAACCCTAAACCACTTCCCTCGGACCTGCTACATCTCAAGACGATCCCAACGATCGATCTCGGAGGACGGGACTTCCAGGACTCGTTGACTCTGGAATCTCAAAGATTCCACGCATTTTCCATCACTCATCTGTCGAACTAGCAAACCCT
>c18468.graph_c0
AGCAAATTTAAAAAAGGATTTAGAAAAAATAGAGCAACTTATTAAAGAAAAGAAAGATTTAGAAAACAATAAAGAGAAAATATTGAGTAATTTATACAAATACGAGACTTTGTATTTAGAACTGACACAAGGAACTCCTTTAATAAAAACATCTGAATTCTATGTAAATAGTCGAGTAGAGAAAAAGAAAGTAGCTATTACAGAGAAAGATCGGATTTTTTCTATTGAATATCCATCTAATTCATCTTAAGAATTTTTAAATGTGTAGATGTTTCATAAATACGTTTAATACTACAAAGTGTAATCTGTGATTAAAACAACAAAGTGATTGTAAAATG
>c18469.graph_c0
TGCCAGTATATGGGAGAGCTAGGATGCCATTTTGAAGTTTACCGCAATGATGAACTTACAGTAGAAGAGCTGAAAAAAAAAAATCCAAGAGGGGTGTTGATTTCTCCAGGGCCTGGTACCCCTCAAGACTCTGGGATTTCCTTGCAAACTGTTTTGGAACTCGGACCACTTGTTCCTTTATTTGGAGTATGTATGGGTTTGCAGTGTATAGGAGAAGCATTTGGAGGAAAGATTGTGCGGTCACCATTTGGTGTTATGCATGGGAAAAGCTCAATGGTTCACTATGATGAGAAAGGAGAAGAAGGCTTGTTCTCTGG
>c18478.graph_c0
GCCCGGATTAAATGTAGCGTTTGTGATAACTGGTAGCAAGAACGGCGCACAAGTTTTCAAAATGCTATTTTCAAAGGTGGTAACTGTACTGAAAAATAAGTAACTCTATTCATTAGGATAGTCATATGTTGGTCTTTATTTGATTGTTATTTTCAATTTATTGGTTACTGTAACATAGTTAGATAGTTAAGTTAAATTAATAGGCTTTTGAACATATAATAATATATAACTCAAAATGTTGATTTATACGGCGTACGAGTAATTGTATGTATTTTGACTTTGAAATTGTGCCAAAGTAGATAATTATTTACATACTTAAATTGATGATTAATAAACAATGTAATTAATTATTGCTG
>c18479.graph_c0
ACCACGGGTGAATATGCACCTTCGCACAGACGACCACTTTATTTGTATATCGTTATATCTGTAGCGTTCACCTCTGGTACAACCTTAGGTCATATCTTATGCATATTCTTTCACTGGAGAACCGTAGCATTGATATCAATTGTTCCAGCCGTAATTTCGTGTGTTCTCCCTTATTTCTGGGTAGAAAGCCCTGCATGGTTGGCTTCCAAAGGAAGATTCGAAGAGTCTGAAGTCGCTTTTAGATCACTCTACGGGTATTCTGAAAGTGCAGATGCAGAATTGAATTTCCTTCTTAATGTTGAGAAAATAAAACAAGGCAATAGTCAAAGAAAGGATGAAAATTTAAAATCTCTTTTACATAAATTTATAATTCTATTCACCAAAAAGTCATTTTGGAATTTGTGCTATTTAAGTGTCGCCACTATTGTGTATAAAATAGCGGGTGGAAAATATTTCTTCATTACGCTCGCCATTACAATGCTCCAAGACTTAACAGGCAGTGGTGATATATTATATTTTATGTTAGTCGTCGACGGATTCTTTTTAATAGGCACGTGCCTTTCTTGTTTATTAATAAGCAGAATAAAAATGAGAACTCTGTTGTTTTCATCTGGTGCAATGGCAGTTATTATACTGGTGATATTATCTACTTGTATATATTTTAATTTGACACTTGTGATAAGTTTCGCTTGGACCAAATGTATATTACTTGCTTTATACTTCATCACTATTAATGCTGGGCCTTATCCTGTTTTAGATAGTTTGCCTGCAGAAATATATCCGTTAGAATTGAAGGGGTACTATATGTTTCTTTTTGGTTTTATAGCAACGACTGCTGTGTTCCTAAGTTTAAAGTTTGCGTTGGCAATGGTTAACGTATTGGACTATCATGGTATATTTCTATTAAACATTATTTTTGCGATTGGTTCGCTTGTTTATATGTGGTTTCGGTTACCAGAAACCAAGGGTAGGACGTTACAAGAAATTGAGCTTTTCTTTGAAAATAATACCTTCGAGAAAGTAGATCAAATGACAAATGAAACTTATCAAAATGAATTAGTCAGTCTGATGAATCGCGAGCAA
>c1848.graph_c0
CGATTTCGCAAAGCAGTGATTCCTGTAGGCCGTCACCATAACAATACAAAATTAAAAGGTAAGATAAATAATTCTAATATGAATTTTATAATAGTAGTAAAAAGATGGAGTAAACAAATAACTTTTGCTATTTTAATATGCTTAATGCAATATTTAAGCATTACAGTAACCTCTTCAAATACAAGGGCATTAGGACGTCCCTTGTTTCCTACATCATTGTAGGTTTGACATATAACAGAAGTCAAAATGCATGCAGTATATTATTATATATTTAGTCTGCAGTATATTTCATCAAATTATGTTTTATTTGTATTGTACGTAAG
>c18499.graph_c0
GGGGAGGGAATTAGTTGGGTGTAGCCTAGCCTAGGCCAAAGGGGCCTTAAGTAAGGCCGTGGTGGACGAGGAGTAAATTTCGTTAAAAAAAAACAATGGCCGGCGGCGGCGGAGGGGTATCTCTCTCAGCTGTCGACTGAACCCAGGGGGGATGGGCAGGGGCCCTGACTATTCATTGCACAGGTTGGACAGGCTGTGAGGCAGTCTCGCAACCGGCAGCCTCAGTCGAGTGCGGCGTGAAAACGCCTGCCGCAGGAGGGTGTTGTGGAGCTTACACTCACACCCGCGTGACACTCCCCATAGTACTGCGCACGG
>c1850.graph_c0
GAGAGTAGTAAATATTCGACGGTTCTGGCTCAACGCTCATCACGTCACGCGGAGTATCCAGGCGCTACCCATCCGAGTACTCATTTTCTTCGTTAGTATATCCGTACGAAGCCAAGACGAACAGCTAGTTTAACATAGAAATGTGCGAAACATGAATGTCTGATTATAATGTATATAATCGTATGTTTAAATAGATTATCCATCTTTATTAACATCGATTGATTGATTACTCTGTTTAATGCTGCGAGGTTCAATTTGTATAGAACATTGCAGCGGCCAAAAATTAGTTACAATCTAGTACTACCTGCGAAGCAAGTACAGGGC
>c18519.graph_c0
GGTCGCTATCAACAGCTTAGGAGCTGCTTGTTGTTTAACAGGTTTTCTTGGGGCTGCAACAGCTGGCAACTGGTCTACATCCTTGGGCGTCAATGTTTCTGTCACATGTTTAATTTTGTCAGGAATGGTGTCAGTTTTATTTTCATTTACTATAATCTGTATTTCATTTTTCGTTTCACTTTTTGTTTCGTTTTCTTTAACTGGAATGTTTTTAAATTCTACTTCTATATGCTTCGCAGGAATAATATTAGAGAGTAAGTTCTCTGAAGAGTCATTTTTTTCATTATTATGGACAAAAGAATTGTCCAATATTAAAGACTCTTCTAAGATTAATTCTGTACTTTTGTTATCGGTATTTTCAGGAGTTGCTGCAGCTACTGATGGATCAACCTGT
>c18525.graph_c0
ATCTAGGTATATCAGAAAACGATAAACTCGAACATCGTTTGACAGATCATCATCAAAGACGTTATATCCTAAAAGGTTTTTCTTTGCAGTTTCATGGTAGAGGCGATTTTTATATGGTACATTTTGCTCCCAATATTAACTGGATGAGGCTGCAACGAACTAGCCACTAGACGGGACTGCAACGAATCTACTGTTATACAATCCAATCGATAACCATAAAAACTGTTATGTGTAGATATTTGAACACGGAGAATAATACTGATAATTAATAATACTATTTGAGTGAGCTTATTTGAAAGTAGCTAGTATAAGTATGTAGTTGTACCTAAA
>c18527.graph_c0
TTGTGCTGGATGAATCAGCACATGAGAAAGTATACATAACTGAAGCTCAAACAAAAGTGCCTATAGCTGCCACAGGAGCTATTAGCATTGAAAATGCAGAAATTGCTGTACTTGACAGTGACATTGGAAGCGTTGAATCTCAGAAAAAGCTAGATTTAACTAAAGATGGAGCGGTATCATTATCAGCAAACCACCTTCAAAAGCTACGCCTGTCATTCCAGTTAACTACTCCACTTGGCAATGCGTTTAAGCCACACCAGGCATTTTTCAAGCTGAAACATGAGTCACAGGTCGAGCATATCTTTCTCGTGAAAACTTCTGGAAAGAAGTCTGAATTAGTTCTAGATTTTCTTGGATTGGTTGAGAAGCTCTACTACCTCTCTGGTAAATATGAGATACAGCTAACCATTGG
>c18528.graph_c0
ATTCACTACACTTAATGCATTTAACTGTGGTACCCTATAAATTTTATAAACACTTTTTTTATTTCGGGTTAAAACATACAAGCCCCAGACAGATCCATCTACAAGGATGCCTAAAGACCTGCCTGATATCATCAATATCAAGAACTGTATTTTTTTTTTGGTACATACATATTAAATACAGTTTACAGACTCGACGCGCTGCTGAAAGGTTTCACCCTAAGATTCCGTTAACAACTTTTTTTTTCATAATTTGATAGTGTAGATCATGGTAGAACAGTAATTTAAGTGTAGAAAAATAAAATCACACCTAAAAGTGTATGTCAAA
>c1853.graph_c0
CCTGGGCCGTCGCTCCACTTCTTGCCAGAGAGATGTGCGAGGAGAAGTTCAGTGGTGCGGCAGTGGCAGCGCTGGTGCCTGCTAACAACCTCGGCTTCCTGTTCATGTATCTGGCCTCAGATTTTGCACTGGCGCACAGGACGATTATATACTGGTGCCTGGCGCTGTCTGCGTTGCATTGTATTGTGTTCCTGTTTGTGCCAGAGTCGCCCGCCTACCTCGCCGCCAGCGGGAAGTCAAAGGAGGCGCTCGCCTCACTCGCCTGGCTGCGTGGAGCACACACCTCTGATCCGTGGCTGCAGG
>c18551.graph_c0
GTTGCAAGAAGGAGACTCTGCAGTTCCGCAAGCACCTGATGGAGATTCCCGTTGATGCCACTCACGAGTCTGAGAGTTACATGGGTAGCCCCTCTCTCACCGAGCAGGGACTCAGAGTTCGTGTGTGGAACGGAAAGTTTCCTGAACTTCACGCTCACTACTCTCTGTCTACCACCTCCTGTGGCTGTTTGACGGTCTCTGGCTCCTACTATGGCGAGAAGAAAGATCTTTTCTTCAGCTTCTTCGGTGTTGAAACAGAAGTTGACGACCTTCAAGTATTTTCACCTCCGGCCTATTGTGAGGGTGTGTCATTTGAGGAGGCTCCAGACGATCACAGCTTCTTCGACCTGTTCCACGACTGAAGAAAACACACAAGATGAC
>c18554.graph_c0
AGCGACAGTAGAAGTGATTACATACTGGTTTCTTTGACTTTTATAATTATAATCGACTTTTAGAGAACCATTACATTATTTGTAAAAGTTTTTTAGTCGGGATACTTTTTTTATTGTCAGACTTCATTATAGCAATAACGGGGAATAGATCCTTCGAGGAATTACATCCATTTTCTTCTTATTTCTTTACTAAAAAAATTGTACCAAAGAAACAAATTGGTTTTGAATTAAAAAAACGAACTATCAACATAATTTATATTTTTGTTATGTATAAACTGTGTTCACTAAAATTGTTGTATAAGCGTTTTCAAG
>c18597.graph_c0
AATTAGGATTAAAAGTACACTCTCCAGCTTATTTTTTGATTTCTAAATATGTACCATTATCCTGTAGGCTTGTTTTTTTTAAAACAGCTCGTCTTTTACAAGGCAAGTTAGAAAATAATATTCTGTGTGTCTAAACATTTTTTAAAGAGCCGTATGCGGCCTGATTGCCCCTGTTTATCGGCCACTGCGTTAAGCCTTGAAAGACTGTGATCATGTTAACAGAGCATACTGGGATGATGGTTCACGATAAATTTTTAGCTTGAGTATAGTTGATTAATTAGGCTTAGTATAAAAATTTCACCACA
>c18604.graph_c0
CTACGAGTCAGTTGATTTGAGATAATTCTAAAATGCTCCAGGTATTTTTTCATTGTTCAGCAGTAGTATATTTCCGATATAAAGGTAGTGACCAGTAAAATTCCTCTCTAGGTGTAGGGTAAGCCGTGCGTCATTTCTTTAATAATTTTTTCCTTAATGCGCTCTAAAAATTTACAATTTAAAGTAATATGACCTAATCGGTTTTACTGATGCCTTTAATAAAATCATTTTAATACACATGCGTACTATAAAATAGAAGTTTACCGTACTTATAAAAATACACTAACCAGGACTGGACCACAGCTGAAAACCAAATTTCTTATCGCTATGAATAGATACTACCACCCATG
>c18637.graph_c0
AATATTTGCATAGTGTAATAGGTGGAACTGAATGCTAATTGAAAAACCAGTACAAATTAGGAATAAAACAGAAAATAGGGACATCAATGTGAAAACAGTAAATCTACTGTTACAACAGTAGGGTTGTTAACAGTGGTCACTAGCATCTTCTATAGTTGAGTAAAAAAATCAAAATGGCCAGGCAATCCATAATGTCACAGATATAGATATTTTGCCTACTTTAAATTGTGAATTTAGAAACAATAAATTATATTTCGTTGTTTGTGTCCTCAGAAATTGTGTAAGAAGATGCATTGCTCCTTTCTATATCCCAAATAAGAAAATAATTACTGTATATATGTATTGCGTAAGAGGGTGCAT
>c18644.graph_c0
GTGGGCATTGCAGTCGGGTTATCTGGTATGTATGTAATTTAAGAGAGCTCATAGTATTTCTGATGGGAGCGAAATTTAAAATAATTAAAAATAAAGTATACTCGAATGGGCCAACTACAAAGAGCTGCAGGTTGAGTATAGCCGCTCTAGGCTTATTTACATTTTTAATAAAACAAATACATTAAAGCTAATTTCGACTGCCACTCCCCAAATGTTTGATTTTGTTGGCAAAATAATCAAACAGGGAAACAAGCTACCAAGGCAGGTCAGATTTTTTTTGGTTCAGTTGTATATAACACAGTCACTCTGTCATGTTATAATAGAAATAAGACTGAAATTCTCTGCAATTGAAATTGCCAATATGTTATGGACTGAAGCTATAATTAAG
>c18646.graph_c0
TGCAATTTCTACAATTCACGTCACACCAGAAGACGGTTTCAGTTATGCTAGTTTTGAAGCAATGGGCTATAATCTCAATGATGATAGTTTGACCCAGATGCTTGAGAGGGTTTTGGATTGCTTTCAGCCTGCTCACTTTTCTGTGGCACTGCATGCTGATGTTGAAGGCAAGAAACTTGAATATGACTTTCCCCTGGATGTGATGGGATACTATTGTGAGGGAAGGAGCTATGAAGGGCTTGGGAAGGGTGGTTCAATCATCTACCACAGCTTTATGAAGTCTGAAGAGTGTGGCTCTCCCAGGTCAATTTTGAAATGGAGAGAGAACGAGGAAG
>c18648.graph_c0
TTAACCCACATTTTCACACAATAATAAGAATTGTGGTCAAATGTTCAAACATACATCCTATAAAGTAGTACAAATTAAATTCAGTAAAAGGGTTATTCGGAATTTAGTAATAATAAGAAAAAAATAAGACAGTCCACAACTAAGCCAGACTAATCCAATATATCCTGTGAAAAAACGACAGTGTCTTCTCGACAGTAAAATGGCGAGCATCAATTAGCCTTAGTATAATATAAAAAAAAACAAACTGTCCTTTGTTTTAGCTTAATTAAATAAAAAGCCAAAATAACTCCAGACTAATCAATTACCTGCTATAACTCAGTAATTGGATTTGGAAACACAAACATTTCGTGGACTTCTTTCTACATTAAAAGTACCTACATTGGTGTAACTTAAA
>c18664.graph_c0
GTTTAAATTAATTGCAAATTGTCGCTCTTTTTTTCTATATCTTGGATAGTAAGTTTTTCCTTTAACATACACAAAAAAGTTGAAAGAATTTAAATAAAACCACATGAAGTATAATTTAAATACCGGTAGTGTACAGCACATGAGCCACTTTCTTTTTATAAGATAATAAATTATTAGGAATCATGGTAACACTATTGAGGAATTGATTATAGCAATTGCAAGATCGTTGAAAAGGGGCTTTTCAAATTAACTGGTGCGACGAAAAGAAATGTGAAAAGTGTCCTTTACTTATTATAGTCTTTGGTGTCCTTACATCTAGTATTAGATCGCGGTA
>c18667.graph_c0
ATTCCGCTGCATGATTTTTACAAAAATCAGATAATGTATTCCTAATTTTGCAATTATCATCAGACGATTCTTTATACTCCTCATCATATTTTTCAATTAAAAAAGTTGTTAGATAAGATTCTGTTAAGTTTTCTAATTTTTTGGTATCTTGATTAACTAGTTGTAAAGGTTTTATAGAAGATAAAAAACTTTTGAGATCCTCGAAACATAAAACATGATTAAAAAAATGTAGGGTATCAAATTTTGCATAATACCTATAAAATGAATAAACTAGAAAATCGTTGTTATTGCAAAATTTTTCATAAAATCCATTTTCA
>c18670.graph_c0
ACTGGAACGAAATCGACGAAACCAAAATTCCGCATGATTAGCTATTACAGTATCAGGACCATAAATACTATTCACATTTTCAACTCCCTGGCTTACGTTTTCGCCTTTATCAAAAAATGTAATATATAGCGTATATTTTCTCTTTGCCAGTGTACATTTTTGACGCAAGCTCAAACAAAACTGAGTCAACTAATCAAAATACTGTAAAAAGGTTTTTTTTAATCAAAATCTCATCTTTCGAACACCATCTAGTGGAAACCGATTGGACTTATGTAACATGAGCTACAGATAACGAAATTATTGGAAATATAATAGATTTGTTTTTAATACAGCTATTATTATTATTATTGAACCCATAGATCGGA
>c18672.graph_c0
ATTTTTGAAGACCAAAATCCGACACGTGGAAATATCACGAATTTCACACCTCCTTTCTTTGTCACATCGCCAAAAATAACCGAAAATGGCATAAGTTATGCTCGAGAGTATCCTTGGGGACAATTAAACTTACAAAACATGCATTCTAATGATTTATTTAGGCTAAGAGAAATGCTTGTCAATCAAAACATTCTTCGTTTAATTGAGACCACAGAAGAATATTATGACCGATTTAGAGCTTGTGTTCTAGCTTATAACATTAATAAACAGTCCAACAAAGCTTTGACACAAGATATATTAAATTTTGAAGTATTTGACAAGTTAAAAAGTGAAGAGAATACTATAAGAGAACTTAAAGAAAGAATAGAAATGAAGAAAAGGGAGTATGATGAACAGGTTAAATCTTCATTGTCAGTTGAAAATGTTTCCAATAAATAATTTTTCTTGAAAAATATTCTAAAAATGATTTTTTTTAACTTCACTCCGGG
>c18680.graph_c0
ACTAAGACCAAATCATAAAGTAAAAGAAATATTTTCAGGACTAGATACACACAGTTTCCAACTCCAACACGGTTAGTTTTAGTCGTAACTCCATTTGATTGGCTCACAGCAACGAGTCAATTTATAAATTCACCTGTATTGAAGTACCCACGTCTTCAGTCTTCTTTACCGATAACACAAGAGCATGCATGTCACTTGATAAATACGTACAAGCCTTCTTTTATGATAATTAGCCCAACAGAGCTGGCAACATTAATCAAACCGAGGGACGGGGGACAATGCGATTTCACTTGCTTCGATTCTATATGGCTGGCTGGGAGTTCGGTACCGCAAACCCTGCTTAATGAAATGAAGGTTATAACACCAGAAACGGAGGTTACTGACGCATACGGAATAACTGAGGCTACGGGATTGACATTCCAAGACTGCAGCCCACCAAAAGGATCATGTGGAAAAAGAATTTCTCCGTTTCAATACAAATTAACGGACATGGAAACTGGAAAAATAATCGACGAACCGAATGTTCCCG
>c18681.graph_c0
GTTTAACATCTGACCACAATCTCGCTTAATGTTGAATGGCAATGTGGTCACCCCTGAAGCTGCTTGGCGTTGTATCTTCAAATTGAGGGTGGTAACTAGCAAGGAGAAATTAGAATATTATCTCGTTTCATTGGCAGAGGCCGTAAAATTAGAGATTTTAACAAATAAGAATGTTGCGTAACAACAAATCCAACAATAAAATACGTTTGACTTTTTTTTTGTGTAGACTCTTGGTCAGCACCTTAATTTTTTTAGTCTTGTCAAAAATCGTTTAAAGTGTGAACAGCTATCGTTATCATTCTACATACGTTTGCTACGTTACGTAACTTTACATTAA
>c18687.graph_c0
CAAAGCATCAATCGACTATTTTGGCCTTTTAAGGTGAGCCGAAACCAACCAAAGTGTGCGGTCTGATGCTAAACGGATGATTGCTACTTTTTATAATGAAACTGAGCACGCGGTTACTGATGCTTTAGATGATCTTCGAGCAGAGAGTAGCTATGGCACACAAGCATTTCTTTACCGGAAGTTACGGAAAAAAAAAATCAACAACGTTATATCATCTTGCTCCATGACAATGCCAGCTTTCAGCAACGCCCGAGACACAAAGGAATTTTTCACAGGGAAAACAAGGATTATCGACACATAAAGAGCCAGTTGAAAAGCATAAAAAGCATTTTCCCGATGTCACCACTGAGGAGTGGCATACATTCTTTAAAAATTAGTTTATTCGCATGAAAAAAGCATTAAAGCTAAGG
>c18697.graph_c0
GCAGTCAAGAATGAAATATCCATTTCTTCACACCTAACACAATAAAAGTAACTAAGCACATACTGATATACTTATTAGATCCGTTTTAACATTACATATACTGTCAACTGTGGCATCTTTATGTTTCAGGAGCAAGAGTACTTACCCTTGAAAATTGAAAGATTATTTCAAATGTATTAAATATAGTCAGTTTCTCAACTTTTATATTGTTTATCTGTGGCAACATGAAAAGTTTTTTATATATTCAACTTTAATATCTGTCATGATATTGTCGTTTCTAAATGTGTATGGGCAATTATGTTTCATGTAATGCCTAAAAATTTGTTTTAATTGAAGGTAAGTAGTATGTTTTAACTTTTTAAATTACATTCTTGGAATATTGTAAAAGTATTAAACAATTCGTTTTTTTTATCATGTTATGAGTTATCACCAATGGTAATGTTACTGAATGTTAGGTAAAGTTATT
>c18715.graph_c0
GTTATGAAGAATGTAATGTATTTATAAACTTGTTACAACATTTCGGGTGATATTTAATTTTGTTACTTATTGTTACTGTATCTAACAGGGTGAAGCATGATAGGAAAAAAAATCGAATTTTAATGTATATTGGACTTGATCAGTGCCGCGACAAGCATCTTCTGCGACGTCGTGCATAATACTGATAAACGCCTTTATTGAGCCAAAATTGTGATTACCTTAAAATTAAAAAGAATATTTTGATGGCAGTTTTTACGTTTTGGTGCCGTTGTGCACTGCACGACCTTGCTCATGTGACGTAGTCCGGTGAAGCTGTG
>c18736.graph_c0
GGCTGAAGAAGATGAGGAGGATGATGGAGAAGGTGATGACGATGATGAAGATGAGGAGGCTGAGGGTGGAACGGGAAAAAGAGCGGCTGAGGATGATGATGATGATGAGGATGACGTTGATCCTAAGAAGCAAAAGACTGATGTGTAAAAAGCTTCACTGCTGGAAATGTTCTCATCCCTCCTTTCCTTAACTTGTTCATCAGGGGAGGGGTCAAAAAAACGTGGTCATCATCAAGTAGAGTCCAGCATCCGTGTACACACACCTAACTGCAGATTTTGTAGAAACAACCAAGACTTCAAAGCTCTACCTTCTTACAAAATACTTTAAAAGGAAAAATTTGTTTGTATTTTTATTTA
>c18740.graph_c0
TTTAATCTTGAAAAGAAAATTATGGCGGCATCCATTTTTAAACAAGGGTTACAATTTTTTAAGAAAACGAATTGTACTCCTTTCGTAATGAACACTTCGACGCTTTTTGAGTGCTTTCAATATAAAACCAGGAGTTAATTTAAAAATTATTCATCATTTGAGTGCAACTGGTAGAAGATATCCCCTTGAGAAAAGGCTGTATATTCTGTTATTTGATGAGATAGATAGCTTTGTCACCAGGTCTTTACTTTGACGAAAATGAAATAATTGGCTTTGAACATTTTGGAGATAGGAAAACTATAAACATTGCAGATCATATATTACTTCTAATGATTAAAGGTGTAAAATCGAAAACGAAAATACCATTATTTACTTTCTGCAGAAG
>c18741.graph_c0
AAGGGGGTAGTTTAAGGGTAAGAGATAAAGGGGGTAATAGGAATGAGGATGGGGTTAAGGACTTTAAGGGGGGTAAGGACTATAAGACCTTATCATCTATTATTAACCCCCATAATATTAACCATTATGATATTATTAATATCCTTTTTAATAATTTCCCTTTTTCTTTAAATTACTCGTATCTTATTAAGAATTACTTACTCAATATCAATCCCCTTTCTTTAAATCAAGATTCTTTTAGAAAATATTTGTATTTGGTAGGGAAGGTTTGTGATGATTATAAAATTATTGATTTAGATTTAATTAAGGACTCCTCTTTAATTAATCCCATTTTGAAATTTTATATTTCATTTTTTAAAAGGAAAA
>c18753.graph_c1
GTGGACTGCTTGGAGCTCCTGTTCACGAAGGTGTACTACAGTAAGGAGAAGACATTGTATAAAACGAGCAATATGCGGCCGACAAATTGTGAAACAATCGGCTTATTGCTACATGGAAGGCAGCTACTGTCATCTGTGGATACGTAGCAGAATGCAGAAGCGACAGGACGCAGGTGATACTATGGTAGACGAGTTACCTCCACCAGCTCCTGCGATTCATCCTGAAGATAGTCGAGCTGCTCCAACGATTACTTCTTGCGGTAAGGTGGGAAAATACCGCGGTAATTCCGAGGCACGACTAAGAAGCCGGATGCGAGACATGATTCGTATTATAGGCGGTAGACCGGCACCGCCTGGCA
>c18758.graph_c0
TGGTCCTAAACCAGTAGTGGACTCGAAAGATGATGATCACAAGGAAGTTACTCCTTGTTACGAAGCTGAGACATCTCATCCCTTATACATGTCTCGCCACTTTGTTTTCCCACCAACTGGTCAGCTTGAGAATACTAGTGACCTTACCGAGGCTAGCTTAACGGGGTCTCATTGCAAGGAAGGGAGTGATTTGAGTCTGAAAGGGTTGGATTTATCAGATGATTTCGGAGGACTTGAGTTTTCCGAGGATAAAGGCAAGAAAGAAGAAAACATTTACACGACAGCTATGAGTTCTCTGGACGATGAAAGAGCTATCGGTGGCTCACACGTGTATGAACCTGTTGAAGAACCGACCGAGCCTGTTTCTCCTTCTGATGTTACACTTGATCTGAATCCTATTAAAGATGATGAGGTAGCAAACTCGCCACCTAGCGAAGAAGCTTGGTGGAAAAGAAGCGTTGCCTCTTTGATTGCCCAAGCGAAAGAAACTAATACAGTTTGGTCCATCTGCATAGCCGCAGCTGTAATGG
>c18770.graph_c0
GTATTAATACGTGCATAATAACGATTGAAGCCTTTGAGTAGCAGTATTAAAAATTAAAATATATGGGAATGAAAGTTTTTTTTCTTGGTCCTATAACAGCATGGTATTTTGTTGTAAGGGACAGCAACTGAGGTTCACACCATATTCCCACGACAAAAGCGGACAATTCCAGGAGTTTAATACCACGAATCATTAAAAACTGAATTTCAAGAATTCTGTATCTTAACTCTGTCGTCCGAATATATTCTTCATAATTTAATGTCTGTCCGCAAAAACTTAGATATACTGGATTTAGTAAAAGACCATATACTAGAAACAGCGAC
>c18789.graph_c1
GGATATCTTTCATCAGCGAAAACTTAAGTTCATTCTAAAATCCGAATTCAAACGCTTTACTACTATGCTATGCCTTATATACCTATGTATATGCGTAATTAAAACATAAAGTGACTTTTAAGGTTTTATGATTGGCATCTAGACAAGGTTGTCCTTTGCTATAAATACTATATATGTTTTATTCAGCTTTTGATTTGTTTTCTTAAGCTCTTACACAACTTTCTTGGGTCTGATTTCACGTTTGTTTTTTTTTTGTTGTACTGCGTAGTGATGCTTTCCATGTTTACGGAAGTGAAATTTTATGAAACGAAAATGTGTCACGAAAAAGAGGAC
>c18796.graph_c0
GTAGAGTTTCTCCAATAATTTCCGCTCTTTACGCTGGTCAGGATTTCTTCAGTGCTTTCTTGGCGAGGTATATTAATTTGTTGGGTCTTGTTTTGTGTAGCGAGTGCAGACTGGAAAGCAGCTAAGGCAGCTCTCTGTGCTAATCTCAGTTTAGCATCGGATTTGTGTCGCCGGCTTAAGGTGAGGGTTCGCGCGGAACTGTGCTCGCGACGAGATGGTAACTTAATTGGATAAGTTACCGCCATACCCTCACCCGTTGGGAAGACCAGTCTGAATTCAATATGTCGATATCGGTCTACGAAGTCAACCATGGC
>c18805.graph_c0
GTTATAATTTAAAAAAAGCCAGAATTTCTAAATAATTTTGAACCTCTACCATTCCATCCAGAACAAGCTTAGAAATATAAAAAATAGCAAAGGATAAAAATTAGAAACAATGTACTGTAAATAAACACACCACCAGTGATTCTCAACAATTTTGAACCTTTTCTATTGCAGTCAGAACTAGCTTAGGAGTATAAAAAACAACAAAAACTGAAAATATCAACTACTAATAGTACGTTTATTATACTCGTAGTTATTTACATGAGGATAAAATATATCATATCATACAATGTAATATTGAAAATTTAAATCGTACATTATTTTTATGTACATTTCGTTTGAACACATGAGTTATAAGGAAATTGCTTTAACTCCTGCCATACAGTTAACGTATCCATATGCTATTACGGAAAAATTTAAACACATAATCAAACAAAAGTACCTAACGATAATTAACAATAACTAGTATTTTAAGATAATAAATTTTATTATAAAAATTTTCTCAAATGCGTCGTGTTACT
>c18813.graph_c0
CTGTTGACGTCTGATTATGAGAACTACAACGGGTCGAATGGAATGGAAGGTGGCCGGTCGGTCGGCTGCTGCCTGTTGAGGGTGGGAGGAGTGGCGGCTCGGCTCCCGATGTACGGTATGCGGCGGGCCGCGGGCGCGAGGAGATAGAAGAGAGGGCATCGGCACGGTGTTCTGCCACGCTGGTGGCCAGGTGATGATGGATGTTGCTGTTGGTTCACGGATACCTGCACCGCTGCTACTTTGTTGGTGTGTGTGCGCGCGGGGAGTTTGCGCCTGGGGATGTGCGGGACGCGGCACGTTGAGGTCGGTTGAAGGCCCGCCCGCACCGCCGCACGCTGCTGTCTCTCGGCGCAAACATTTTTGGGGCTGCGCGCGTGATTGGTGGATTGGAATGGAACGGGTACGGCAGGCCTGACACGGTGCTTGGCCGTGATGGGGCCTGGCGGGTGCCAGCAAGTGCAGCTCTGCTGAGGGAGTTGGGGTAGAGGAAG
>c18814.graph_c0
GTGTCGGTTCAGGTGGTAGACGTCGCGGAAGGCCTTGCCACACATCTCGCAGGCATGGTTCTTCCGGATGCGCTTCCCCGAGGCGGTCGTGGTCACCACGCCACCGGCGGCCACTGCGGCAGCGCCGCCGCCGGCACCCGCCTCTCCCCCTCCCCCGCCGGCTCCGCTCAGCTGGGGCACGCTCAGGAGGCTCAGGGGCACCATGGTCGGCATCTTCATAGCACCCGAGGGGACCCGGCCGGCCTTGGCTCCCGTGTGGATGGCTTCGTGCCTCCGGAGATTGTAGCCGTTCTTGAACTCCTTGGCGCACAGAGCGCAG
>c18818.graph_c0
ACTGATTGTTAACATGAAAGACATGTCTTATTGTAAATTTTTGTTTTTATGAAAATTATGAACATAGTTCTAAAAATAACTCACATGAATGGGTTTTATTGAAGTTATATACTACTTTTGGCATGTTAGGAGAGATCAAAGGAATGTTACAATGTAACACAGTATGAAGTTAGTTGATAAACAGTTTTTATTAAGTAAAAATAATATGTTATGTATATTGCGTATATTACTTATTATAACATTTATTTAATTATAGTACTCGGTTTTATTCGTCGAAATAGTTAATATGTCAAAACATTACATTGTTATATTATGGCCAAAAAGTAGAACTTATTTTTTAAATTCAAAATTATATAATTTAGTGTTAGATCGCAATCTCATCTGACCTTAAATAACGATGTGGTCTAAATGGTAAACACTCTAAACATAGACGTGAACTGGCTCTCTAGGATAGTTTTCAGAACACACCTGTGTGAGCTTGGTGACAG
>c18819.graph_c0
GGCGCGCACAACTCAGTATATGTGATAGAAGTAAAATTTAATTCATCGATAACGAATATTTTATTTCTGTACTGTTTTAGCAGTTTTTGTTTCTTCGTTCTCCTATTCTATAGCACTCATCAGTTTCTCTCAAGTTAGATAGATCTTTCTATTTCTCTCTTTGACTGAGTGACTATTTTCAGCCCGTTTTCAGTGAGAAGCAACTATTTTATATTTGTATTGAAATTATTTTTTAAATATTATTTACATCACTAACCTTTATCTATGTATCGGCTTTTAACTAGCACCTATTGTAGTGCTATGGAATTTATTAATCATTCTTCATTGAATAC
>c18825.graph_c0
CGACGATGTCACTGTCCCACTCAGTGTCACTGTCCCAACAGTGACTCCAGTGAGACTACCTTTAATTTCTTTGTTCTCTACCACTTTAGAGACACCAAGGCCAAGTCCAATGGCAGAATAAGCAAAAGACATGACCGCAGCGACAATGGAAAGCCACCATAACTGATCAAAATCAGGAATCTGAGAGAATATGATTTGTACAATACCAAACGCAATCATGTAAACATTTCCATTAACATGACAAGGATCATTTGGTCCATTCATCTGTTGGCAACTTGTCCTTTGGATTGCTACCAAACTTATAG
>c18827.graph_c0
GCTGGAAATGTTTTTAATACTATGAAGAATGATGTTGACATGGTAGCCAAACTTATTGTGCCTCCGATGCTACGGTATTCTAAAGGAAAAACCTCACCTCCGATTACGTTTGGTAAGGGCAACATGCCCGTAGCGACCGTAAAAAACTGCAAATTGATCAGCAAAGCTGGGATCCACATAGCATCGTAAGGTAATGATTTATCTTCCTTCAAATACGTATACGCTGCGATTGCTAACTGACTACCAACACATAGACCTCCGGTAGCGAACATCATCGTCCGTCTCTTTAATTTATTTATTACAAAAACTGCAATGGAATTCGAGATAAGCCTCTGCGTGTCTAGTATTATCATCCACATATAAGCATTCGCTTCCGGTCCTAATATCAGTCCTATTATTCTCGTCGAATAAGCTGCCATGGTGGTCCCACCGGCGAACTGAACCATCAAATACGCGTGCATCATTAGTATAATCGGTTTATGGAATTCTTTCTTTTTTACTGTCAGCATCATCTCATCAA
>c1884.graph_c0
GAAACTGAAACTTCTTTGGTTTATTGTATTAAGTTATATAGGTATAATATAGGAGAATTCTCATAAACTATATACAATACGAAGTTCCGTAGTATAAACACTTATTAAATACTAATACTCATTAACACATATATACTACTCATTTTGGTATACTACTAGACAGACAGACACACACAAATTTTTCCCTACCGTACCATAAGAAGTTTTATTTCAAAAATGCAATTCATAAGAAGCAGGATTTCCACACAACCATTTTCATGAGAACAATATCGCGTGCTGGACCTAGTCAATATTTACTATGATAAAAAGAAAATAATAGATTTTATAATCGATAAACTTA
>c18860.graph_c0
ACCTTGTTTAAGAATAGCCGGGACTTTCTCCACAAGCTCTTTCGCTTCCTTCAGACCCAAACTTGTGAACGTTCTCACTTCTTTTATCACTTTGATCTTATCAGATGCATTAAACTTCTCCAACTTCACATCGAAAGCCGTCTTCTCCTTCTTCTCCTCTACATTCCCAGCTCCGGTATCTTGTTTTGCTCCAATGCCGTCCGATGAAATCATCTGTTGTTTTGGAAGCCTCAGGTGTTCATTGAGTGCAGGACCAATCTGTTTTCTTTCTTCTGGAGATAAAGCAGCTATACGCTCAGCTAGCTCCATGATTTTGCTTGAAGGCTGGGGTCTAGGACCATACGGATCATAAACTGACGGGTATTTGTATTTCTTGGGTTTAGCTTTCGAGACAGAGTCTTGCTGCAAGAAACGAACTTGCACAGACCAGATTACTTCCGGTTGACATTGGCGAGAACGAACGTTTCTAACAA
>c18869.graph_c0
CGCGATTATATACTATTTAAAGTTCTACAGTAATCTAACAGCTTGCAAGTTCACCAAGAACTAGGTTGTATTTTTACTTGGTATTTTTTTTTTTGTAGTAATTTTCCAATGTATGTTGTATGCATTATTAATAAACTAATTTTTTTAAATTCTTTATTTCTTTTAGTATTTGAACACAATCTCGTCTTATGTCACAATGTGACAATACGGCTATGACACTAAATCTAATGTCACTGGCTCTCAAATGCAGCTGACAGAACACACCCATAAATGCTTGATGCTAAATTTTCAATCTGAGGTTGACAGCTAGCTTAGAAAAAGAAGTGAGCTTAGAAAAAGCATTATCATCATGCTATGAATTCATCAAGAGGATTTCTCAACTGATAGCTATGGTTCACTTGAAAATTCAAACCTATGTTGATCAACACTG
>c18873.graph_c0
GACCGACCAGGAAGTCTTAACTTGTTGGATCTGAGACTACTGGTTGTTTCATCACTATCGCAATATATATATCAAGTTATATATTGCTACAGCCCCATGGTAATAATTATAAACACAAGTGTTTATTAGTTACTATATCGTATGACAGTTCGATTATAATACAATCATAAATATAGATCTATCAAATGAAATATTATTGCACATTTCAAGGAAATGACACTAAGAGTATGCGAACTTCATATGGATTAAATTGTTTTGTCTTTTTACCATTTACTAAGTCATTTGTGACTTTAATATAACCTTTTTCTTTTAATCTTGTGAAATATTTTTCGTTATGCCTTATAATCAAATTGATTTAACAATGGATTTCATGGTCTTTTTCCTATGATGGTACCCGTCAGTTCGCCTGGAGACAGAGCCAATACTTCAG
>c18874.graph_c0
GTAAAATTTATAAAAAGTTTGTGATTAGGTTTTCGTTAAATTTATGTTTTAAAATTGATATATCTGAGCAAAATAAGTATGTAATATCAATAAATATAAAATTTGCATTTTTAATAAATTAAGTTTTTCCAAACACAGCCATAAATGCCAACCAGTGATAGCTTGGCCATAAAAAAATGTTAAAAGCATATGGTAATATTACCTCTAATGAAAGGATAATTAACTAATCATTGAATCTAACATTCATTCACTGTCTTTGAACTAACAAATGTTTCCTAGCTTTCCTGTTTATTTTTTTTGGTTAAGACTACATTTTGAAGTCTATAATGTATGATATTATATTTTTATTTAATAAGTTTACAGTGTATAGATTAGGGTGGGCCAAAAAAAACTTATAATTTTTTTTTAGCTACCACGATATTATCGTCCAAGATGACGAAAAA
>c18881.graph_c0
GGAAGCGACGGAAAGCGTCCCGTCAGTTCACAGAGTATGCCGGGCTCTGACGGCAACTCCTGAACGGACACGCCCCTTCTGTCACAAGGCCAAATGTATTTTGCGGCACAAGACAGAGCAAAGATTTTTGCAAAGACGCTAGAGGCGCAGTCAAGATCGTATCCCGCAAGAAATACTCACCACGATCTAGTGATACACCAATTCGTCAACAACTATCCCTCTGATCTGAGCACCGCGAACACCAGGAACCAACCGAGATATTTTGTCACCCCTCGTATGGTACAGAGGGCGCTGAGATCACTCAATCCAAGAAAAGCCCCGGGTGTAGACAAAA
>c18897.graph_c0
ACTACCGCTGCCAAAGCGAGACCCTATTATATAAAATAAAAACATCTAAATGTAGTATATTTACAGATCTTAAGCAATGTAAGTAGAACATTAATTATTCTATAAAACTGTATATACTGAAGTCTAATAAAAATAGGTATATGTTATGACATTATAATGTGGTAAGCAGGGACATATTATTTGCAAGTTGTCTACTTTCTATACAATACAAACAGTGATCTCGACCTTATATAACACAGTGTAACCACAATATAACGAAAATGACGGAAATTATAAAATATTATTATACCGTGTAATCAGTTACAGTG
>c1890.graph_c0
AGACTTTGCATCGTGGTGCGGAAAGCGCCCTCGGAGTTCAACGAAAGCAGATTCATATCGATGGCTATATACAACGAATTTCTTCTCTCCGTCTTCCTCAATATATCCATGTTGTTTCTGCAGTCACCAGCGAACCCAGATCTCCTGTACATCATATTCTTCTGTCATACGCAGCTCACAGTCACTTTACTGCTATGCTTTATCTTTGGAAGCAAGGCTTACATGGTGTATAAAGGTCACGGTAAAGATGACCGTGAGAAGACTGGCAAGTTCAGATCCAGGCCAGCTGAGTCCACATATACTATGACTACCAATCGCA
>c18901.graph_c0
GCAGGAGGCGGGGTCGGTCACAAAGTCGGAGGACACCACGTCCTCGTCCGTGTAGGCCAGCACGCCCTTCATCTCGCCCTCCGACGCCTCCTTGAGCGCCTTCATGATGTCCTCGTACGTGGTCGCCTTCTCCAGCGTCACGGTCAGGTCCACCACCGACACGTCGTTGGTGGGCACGCGGAAGGCCATGCCAGTCAGCTTGCCCTTGAGCTCAGGCAGCACCTTGCCCACGGCCTTGGCGGCGCCGGTGGAGGAGGGGATGATGTTGCCGTTGACGGCGCGGCCGCCGCGCCAGTCCTTCTTGCTGGGGCCGTCCACGGTCTTCTGGGTGGCGGTGGTGGCGTGCACGGTGGTCATCAGGCCCTCCTTGATGCCGAACTTGCTGTTCACA
>c18905.graph_c0
TATTTTTACTTTTTTTAGTGCTCTTTTTACCATTAGAAGCTGCTATTTTACTGTCATTGATATCCTCTGAGAAATTCGGATGCATAACGACGCCTGAGCCAAACATACTTACGGACGTTTCTCCTTTATATGGAGATGCGTCGATGCTTTTCTTACTAACACATCTTTTTAAATTGTCGTTAGATGGAAATACAACATGAGTGTTTTGTGCATCATAAAGAGAATATGTTTGTTGGTTTAAACTTTTATTGTCTAAATAAGTTTGTACATCTGACTCAAATATTACATCAGCTTGTGTTTCAGATTCTTCTAAATTTTTTTCCTCTACAGCAAACAAA
>c18910.graph_c0
ATAAAGTTCACATTAACCAGAATATTAATAAAAGTTGGAACAGTTTCGAAACAGCCAACATATTTGTATTATGTACACTAAGGAAATACTGATTATAAAGATTTAATTACAAATAAAATATAAGAAATTTACAAATAAAAGTATAACATATGATAGTATGATTAACCACTGATTTTGCTAAGTTTTCAATGATCCTCAAATGGAGCATTTAGAGTGTATAAAAATTAACCGTATCATCTATGATAAGAAGTAACAAGTTCATCTGATGTTAAGAAAGTACTGCAGCCATTAACTATGTGTAACTGACCTCAAAAGGAAGCAACATTCTGAGGGCTGTCTGTAAGGTTTGAAACGCTTCGTGTGTCAGTCTAGTTTGGCGGCTGAAATAAATGTAGCGGTGAGGCTTCCATGGGTGAACCTTATACGGGCACTATAATTCTTTTTTCTTTTTTTTTATACTATCGGCGG
>c18929.graph_c0
GAATATACCATATTACGTAATACACAGATATTCGTGACATTGTTTAAAAGATAGTATTAACTAACCGCACAAAATTCAATTGATGACATTTATAACCTTGACCTATAGTTTACGTGAGGAACTTTTAAACTAATTATTAATAACACAGCTACTGTCGTTTATAAGTACTTACAGGAGGTAATAATACATCACTTACTTCTGATAAAAAGTTTCAAATGCAGCATGCAGTCTTAAGTAAGATAAACATATTCGTGACATTGTTTGGAAGCCGATGTTAATTAAGGTCGTGAAATTCAGTTAATGATAATGTGAACTTAACTTGTTATTTGCATAAGTAACTTTTAAATCAATTACCAATAAAACTGATAATGTTTTGTCACTTTTAGATCGG
>c18933.graph_c0
GGAACATAATGCGAACGTAGAGGAACCAGCACATGAGCATCCGTTTAGAATTGGGCAACCTTCTAATGTCGACCAAGTGAATATTGAACAACACGGTCAAAGCATTGACCAACAACGTTCTCATTTGCCACCTCCTAAAAACAATAGAGCTTATACCCCTGAAGAATTTGCAGGTTTAGTAGCCGCCGGGTATGCAGTGACGCCTGTTCCAGTCAGTGCATTAAATCTGGAAATAGCACAATCGCGATCAGATACGGATTCTTTTCAACAGCCTTTGCCAGTGCAGTCCAAACATCGACCAGCCAATAGACGTCCGCTATATCTTCCATTGAGAGGAGATGATGCGCC
>c18934.graph_c0
ATCCACTACATGACAGACTCTCTATTACTTAATCATAATAATATTGGCATAAGAATAATTATTTATAATATCATTTGTAATATGTGTGCTGCCTTATATGCGTTTTTTTCACGTCATTTAACTAGAGTGCGTTTATTTGATAGATTACACATGCGAAGGTTCGAAGGACCAAATAACTCCCTCCTAATACGTTATATCTAGATAATACTGTTGTTTATCCTGCCTTATTGTCCTAAATAGTTGAACTGATTTTGACGAGACTGGCAGATAGAGGTCTTTTCAAAGTAGCACTGCATATCATTACTCTTCTGTATAGGGGTTACCAACAATTATAAAAAAAGAAAATAGTGCGTGGATTCCCTCCGCGCGGTGGAAGTGAAACTCGGTAATATGAAAATGAAAATAGGAAGGGTTAGAAATTGATTTTTACTGAAATCATATTGTTTCTTTAAG
>c18936.graph_c0
GCAATGAAGCAGGATCATCCCAAGTAATTTGATGAAGCTCTAAAGTGGCAGGACTAAGCCACATACCGAGTTTCTCCTTCAGAAAAGAATCTAATGTTCGCAAAGACGGCGTGTTCTCTTTTGAGAGTATCGACAGAAGATCAGCTCGGAGGATGGACAAAAATCTCAACCCTCCAGGATGTGTATTCAACCTCTCAAATAAAACTTCATATGTTGGCCTAAGAGCATGCCTCAGATTCCTCTCAATGCGATAGAAAACAGAAGATAAAGCCCCCTTATCATCATCACTAGCTGGAGTTTCAAGTCCAAGATATTGCTTAA
>c1894.graph_c0
GATAATAATTAATAAATATTGTCAAAAACTTAATTGTTTCTTTTAAATATTTGTTTTTATTTTGTCAACTAGGAATGTACCCACAGTAATCCCATATAAATTACCATTGCTTATTCAGGGTTTCTATATTCCCGGCATATTTACGGAATATATACTCCGCAGATAAAGAGCTTTTACCGTATCTATTTCGAATAGGTATTTAGGTTAGGGCGCTGAGAGAGAATACCGAATTTGATAGTGCGCCGTGAACTACCTCGGCCGTTTGGCTACCTGTGCCCTACGTAATACTTGAACATAGGCAGTATTTCAGGCCATCCCAACCGATAACGAACAC
>c18946.graph_c0
ACTCCATTTCATATCTACAGGCTGACACTACATAGCGCATACTTATAATTTTAGCTTTAGCAAGTATTATCGTTATCAAACGGCATTCCAAGCTATGACTTGACCGTGAATACTGTAATTTAGAAAGCCATATCAGACATGACAACGGCAATCGTCGACAGACCTACTTACCTTCAGGTGGTTCTTATCAAGTTTACTGAACTGTGATAACAAAAGAAAAATATTCACGCCAATCGATACTTTTGTCTTTATATATACTTATATTATAACATATCCGATGTGCCTATGTTCATGATTCTTCGCTTTTTAAACGACTTTGCTGCTTTTGATTTTGATGAGATTTATTCACTTATCTGGTCACCTGGATAGTTCTTGGTTATTTTGGACAGGTAGATGGCGCTG
>c18947.graph_c0
GCTTCAGTGCGTGTTTCAATGCAGGTAACAGAGCCTCCATACACTCGGCCACTGCGTTTGGGTTTCCAGGCATGTTGATTATCAATGTTGAGCCTCTAATTCCTGCCGCAGAGCGCGAGAGCATCGCAAATGGAGTGATCTTTAAGCTCTCTTGCATCATAACAAAGAGGAGACCGGGTGTTTCTCTCTCGATCACCTTTTTCGTTGCTTCAGGTGTTACATCTCTTGGAGTGAAGCCAGTACCACCAAGTGTAAGAATGAGATCCATTTCGTCAACATCGCTCCATTTCTGAAGAATGTCTTTTATTCTTTCCACTTCATCG
>c18957.graph_c0
GGCGCAATAGGTACTGATAATGCAGGAGTCGGCAGAGAGACCTTGTGAATGGATGCAGTCGAGAGTGCTCCGTATACTGGAGCAGCAGCTAAAGGTGCTATCGGGGCTATATGGCCGATGGGAAGTGATGCAACGGCCGGGGCATAGATCGGTGCCTTCACAATAGGTCTTATTGTCAATGGGTGCACCTTGGGTCCTTCGCGCCTGATGATGGCGTTGAAACCAGATTTACCGTCAGCCCAATAGTCAACTGTTCGGATTCCGCCACCGGGTTCCACCAAAGAGTATGATCCTTTAACGCCGTCTCCTTCACGTTTCTCCCATTGCGCCTTGTTGTCTCCAGTTGAAGGGTCTTTTACCGAGTACTCAAAGGAATATTTAGGTATCGCATGAGTGTGAAGTGAATATGCTGGCG
>c18964.graph_c0
GTCCTGCAGTTCTTGCACGCCTTGTCATTTGTGCAGTCAGCGGCAAGATGTCCCTGTTTGAAGCAGTTGTTGCAGAGCCTTAAGTCTCCTGCACGAGAATCCGAATTAGAGCAGTCTCTGGCTCGATGTCCAGATTTACCACAGGAGTGGCAGATTCCTTCGTTTGAACAGTTTGAGGCTACGTGGCCCGGTTCTCTACAGTTCCAACAACGTGATTCCGCAGTGCATTCTGCTGCAATGTGCCCTGGAAGACCACAGTTGTTACAGACGGAAACATTAGAACAGTCTCTTGCAAAGTGACCAGGTCG
>c18970.graph_c0
AATATATCCTAATATTGAATTCGCTGGTGAAAAAAATCGAACTAAAGGGCTTTTGATGTTACCCATCCATGCTTCCGGTGCTAATGAGAACATCAACTTAATTTTGTTATTATAATCTGGTTTAATTGATGCCATTACGTAGAAACTCGTCGTGCCTTGAGAATAACCGATATAGTACAAGGCTTTCTCTTTTGTAACATTTCGTATGTAATCGATCGTCGCCGGCAAATCGTATAGTCCTATTTCCTCCCAAGTGAATTCCCAGAATTCGGCCTGATCGGGACTTAAACTGATATGTCTTGAAGCGTGCTTAGTTCCTCTCGCATTTCCCATCCATACATCGAATCCTGCATCAGCTAAAACATAAGCCAAACCTCTATCGGGCCCTAAAAGAACCCAACTGTCAGAGCTATCGAGGATTCCATGCATTAAAAACACTGTTAGATTGTTTGTCTCACCTTTCCTACCTTTTGGTATTCTATGTATGTT
>c18976.graph_c0
AATGCCGAGAGGAGGTAAAAAGGGCCACAAGGGCCGTGGAAAGCAGTTCAGCAACCCCGAGGAGATTGACCGTCAGATGAGAGCTCAAAAGGAGTTGGAGGAGAATGGAGGAGCTGAACGTGGAAGTTCTTCAGAATCAGAAGAGGAGACCAGCAGTGATGATGAACAACCTAAAAGGAAAGGTGTTGAAGGATTAATTGAAATTGAGAATCCCAATAGAGTTTCCCAGAAGAGCAAGAAGGTTGTGGAAATTGATGTCAATGCACCTAAAGAGCTATCGCGACGAGAAAGGGAGGAGATTGAAAAGCAGAAGGCTAAAGAACGATACATGAAGCTGCATCTCGAGG
>c18980.graph_c0
GGCATTTTTATTTTTTTAATTCGAACCTATATGTTTATATCCTATATAAGATTATATATACAGGATCGCAGGCCAGCACAACTACCACCTTCGGTAAACTCGCGTCGGTATTTACGTATTAATGGCACCGCAACTTAACGACATTAGTAGCTCGATGATGATGATCAAAATGGGTAAAAAATAATTTAACAACAATTGACACATTAGACCAACTTCAATTGGTGTGGCGTTAGTACCTTCACGTCAGTGATTAATTGAAAACACAGCAACACTTTGTTATATTTTCTTGGAAAATAAATCAACATTTCATGTCATTGTTGTAATGTGTCAAAGCGGCTATAATATGGTGCCTCTATTATAGTGTTTTTTTACTAACTTTAGAAGGATATTTTGTAAAAAAAAACAATATGCAGACATATTTTGGCAAAATGGTCATTATATTGCATCCAAGTTACATGATGGTGGTTAATAAATATCATAAAACTTAATGAAACTTAAGAAAATAGTCTGTTTAACTCAAAATTTAAAAAAGATGTATTCAAAAGTTGGATCATGATTTTAC
>c18987.graph_c0
GACGAACTGGTGAATCTAATTGTATAGTCTGCACCATTGACACGGTGACGTGTCCTTGCTTATATTAAACTACAAAACGTCCTCAATATAAAATTCTAATTTTATTACAAAACAAAATTCTTATCAACGTAAAATGAGATATTTACATAGGTGATTAGTTTACCAATAAATATTTGATTAATATTACGTGATACAAAATAAAAAGCACATAGTTGAAATTGGAAGACGCGTCTGTTGTCTGCAACGGCAAGTTACATAATGCCCGCCATTATGCAATTATAAAATGCTAACGAAAACATTT
>c19009.graph_c0
GGCCTGTTGAAGCTCAATTTCGTTGATTTGTGCCTCTCGATCCATCTCGATGATCAATGGAACAACAAGTATGAGAAAAGTTGTCCCAGCGATCCACGCTGCTTTTCCGGTGCTCCGGAGCAGTTTCTTCGATACTTCGACGGCATCTCCTGCTGCGCGTCTTCCTTGGGACACGATCTCGGAGTTTGAAATCCTCGCTAATATGTTTGGATCTCCGCCGCCAGATTTACCGGCTCCGATTCTCTTCGCCGCCATCGAGTGAACAAAAGTTTTTTTTTTTTTGCTTTTTTGGGTTAAAACTTTCTG
>c19010.graph_c0
TCTATGTGTTGAAGACGGACTCTTTGGTCCTGTTTCCATGTCTTCCCACTTCCTTCAATTATAAGCTTCCAGTGATCCCCAGTATCGGAATTTGTATCATCTCCAAAGCAGCTAACCTCTAAGTTCCCTGATATAGGAGATGCATGCAAGTGACTGTGAAGCCATTTTCTGGTCTTCATATGCTGCAACCTAATGGTTGCTCCACTCTTGACAGCATCACCTTGCTTTTCTGTTGTCCCAGGCACAGGTTTAACAATCCAATAGCTGTTGGAATCAACGACGCCTGGAAAACCAGTGACTGATTGCTG
>c19012.graph_c0
ATTAGTACGATGTATACATCTACGGTACGTATGTCTATAGAAAAAAATTATGTGTTTCCATTTTAATAGAATTCAAATCACAATAATAAATGACATAAAAATTAATTACACGCAAACACGCGTCGGAAAATGTCGGCATTTGTTATTTTATTAACGAGTGATGACAATAATTTTATAGTCGTTTCACCATTAAGCCACATTTGTCTGATGGCCCATTATACAACTGCGTTCAAGGTGTATAAAGGTGAGGGTTAAATATTCAAATTCAATTACGACTTTCATTGGAGTACTGGGTTAGGAAGGGGGGAATCGTAGGACTTTCGACTTGCGTTAATGT
>c19084.graph_c0
ATACGATCCTTCAACAGGATGTTTGAAATGGTTGAACAAGTTTGGCGAATACCATAGCGAGAAACTTAAGGTGGAACTCAACAGACTTAGGAAGCTCTACCCTCATGTCAACATCATATACGCTGACTACTACAACTCTCTCTTGCGCATTTTTAAAGAACCAGCCAAATTCGGGTTCATGGAAAGACCCTTCCCTGCTTGTTGCGGTATAGGAGGACCGTACAACTTCAACTTCACTAGGAAATGTGGGAGTGTAGGAGTGAAATCTTGTAAGGATCCTTCAAAGTATGTGGGCTGGGATGGCGTTCATATGACTGAGGCTGCATACAAATGGATAGCTGATGGAATACTCAATGGACCATATGCGAATCCTCCTTTTGACCGG
>c19098.graph_c1
AAGTTATTTTATTTCAAACGGTAGCAGCAACAAAGAAAAAACAGCAAAAACAATCCAATAGTTTTTCAGCAATAATTTTAAAAATATTTTGTACCACTAAAATGCAGAAATCAGAAACGAATAATCTAGGTAAAATGCAGATTAACTAGGCCACTTCTTTAAAGTACCGAAAATTGTCTGATTTCTCATTTATATGTTGTGCACATTCGCCGGTGAGTGTTATCGTGAACCAGTAGCAACGTGCTAGGTTAGAATAGGTTGGAATTGTGATAAAAATAAAGCGCGGGTGGTGAGTGAATGAGAGAAA
>c19104.graph_c0
GAGCTGTTTAACATTAAGAATTTAATAAACCACGGAATTAGAAATTAATTAAATAAGTTGTAAAAAAATAATTATACAAGAAAATACGTTCAAAGTAATGTCCAATCCTAAAGTATAGGGTCGCTTTACAATATTGCCTGATATTGATTAACGCCTCCGAAAATGAAGAAATGGAAAGGGACCTATTTATCAAATACTGTAGTCGTATAAAAAAAAAAAATTGTGTGACAATAGATTTTAAAGTAAATTAACCCACCATGATATAGATTTAATGTGTTATTTTTCTTCACTAAAACAGAACTCATTGTACGATTTGAATT
>c1911.graph_c1
GGGGACAAAATGTACCGTTAGAACCTGAAATCAAAGCACAGCGTGAAAATAAACGCCTGAAAGCATTAGAACTGCAATCAATAATTCTAAATCAACTCGAGGACCGAGAAAAACGTCGCCAAGAAGAAAGGGATCAACAATTAAGAGAAGAAAAATTAGAAGAATTAAGAGTACAAAGACAACGAGAAGAGGATCGTCTACGATTGGAAGCTGAAAAAGAACGTCACCAGGAAAAACAACTATTAGAACAAAAGAAATTAGAGACACTAAAAAAAGCTCTCGAAGAAGCAGAAAAAAAAGCAAAGTTGGAAAAAGAGAGAAGATTTATATCACTAAAAAAGTCGTTACAGTC
>c1912.graph_c0
GTAAAGACCTATTATTCTCGATGTTTATTCATACGAGACCGTTTCCCTATTCTTCACTTTAGAATAAGAACTATTGTAGACTATGAAATGTATAGTTCCTAACATACTTTTATTTTGTGGATACATTGTTAACAGTGTTGTGATCGTTAGTTCTTATCTTTATCCTCTCGTTACTAAAGTGGCGACTCGTCGTGTTGTTGTTCCAATAATGCTACTGATTGTCGACTTATCTTTGTGGTTTTAGTCAATTTGTCTGCCGCTATTCAATTATTATGCTTCATGTGACCGCAACGTCTGTACTCA
>c19122.graph_c0
GGTGGATCCAGATAATGTGAGGCCAATCGAGCAAAATGCTATTGTCGAAGCTGAGAGATTAGCTCAAGCTACCAAAAATGCTCTCAAAAGAAAGATTGAGAAAGCTGCGAGTTCTGATTATCAGACAAAAACTCTACCAGCAAAGCTCAAAATCGATCCTAATGATCCCGAGGATGTAAAAATAGCTAAGCGTAAGAAGATACATGCTTTCAAATCCAAGGCAAGGTTTGAGCAACTCGAGGTTGTGCAGAACAAGAAACAGAATGATTGGCAACAGTTTCAGACGACTAAAGCCAAAACTAAAAAGGTAGGGTTCTTCACAGGGAGGAAGAAAGAGAGTATATTTAAATCACCTGAGGATCCATTTGGAAAAGT
>c19145.graph_c0
TCTATCAAAGTACGAAAAAAAGCGTTGAAGAACTGTAGTTTTTGAATGGGCGCCCTTTTAATATCGTGTTAGGTCATAATAATTCATAATGTTGGAGAGTTCCCCCAGTTGCCGTGGTATGGTCCAGTCGGTAATGGACGCGGGTACAACATAAAAACAACTCGTAATTAAATTTGGACAAGATGTTGTAAAAATTATGTCACCAATTATTTAGGCATAAGGCATAAGAGCTTGGCTTACGTTTGCTGAAAAATTGAAGGTCGGTCGCTGATAAACACTGACTTAGAACAAATGCATTGAACTAAAAGAACATCACAG
>c19161.graph_c0
CAGCAGCCTTCTCCATGAGCTTTAATGTAGGCGACGAGCCTCTCGTCCTCTTCTTTCGTCCATGCTCCTTTGTTTGTGTGAGCTTTCTCACAGCACGGTGACCTTCCCATACTTTTATGTTTACTTTCTTTCTTGTGGTTTAGATCTTATTTCGTCTCAAAATCTTATATATAGGCAGATCAATTCTACTTGTTATTTTATATTGAGGGATTGGCTTTTAGCGAGGGTTTTGGCTAAAAGGGTATAAAGGGATTAAGTTGTTTTTTTGTGTAGTGGAAGAGGATTGAAGCATTTGGTGGGGCACTTGGATTTTGGGTTTGGTTGAAGGTTCAAAGCTTTGGTGTATAGTTTATATAGGG
>c19195.graph_c0
AAAATTAATAAAATCATGAAATGCGTGTGACACAATTTATGGGTAACCTTTAAGGTTCTGTTGTAGAAGTTCGATAACCTGTGATAAAGACGAGTAAAATAATATAAAAATCACGAAATTCGTATGACACAATTTATGACTAACGTCCAAGGTTATGTTGTAGATGGTCGACAAAACATTATAAAGACGTGCAAAATTAATAAAATCATGAAATGCGTGTGACACAATTTATGGGTAACCTTTAAGGTTCTGTTGTAGAAGTTCGATAACCTGTGATAAAGACGAGTAAAATAATATAAAAATCACGAAATTC
>c19219.graph_c0
GTTTGCATATGCCATTGGCTTGACATCCGGGTGAGGCATGATCAACTCGGTTTCAACAGATGTATATAATCAACTTGGCTTGGTGAAGCTCCATACAGTTTTCTTTGTTGTTCTTGTCTCCTTATGTTACATCGTTGATAGTTAATATTATTCTGCAGTACACTCCAGCTATCGACGTTTGGAGCATTGGCTGCATCTTTGCAGAGGTACTAACATGGAAGCCATTGTTTCCGGGAAAAAGTGTTGTCCATCAGTTGGAGTTGATTACTGATCTTCTTGGCACACCAAAATCAGAAACAATTTCTGGAGTTCGTAATGATAAAGCTAGAAAATACTTGACTGAAATGAGGAAGAAAAATCCTGTCACCTTCTCGCAAAAATTTTCCAAAGCAGATCCATTAGCACTCCGTCTTTTGCAGAGGCTGTTGGCTTTCGATCGACCGACTCCTACAGAGGTCTCTATTCTGTCTTTTTCACTTTGTAATTAGATTCTTAGAACCTCAGATCCAATGCCCACGATCTTCTCTCCCTTTCATCTGTTACAACAATCTCACGGCATTTCCTTTCAAGACCAACTGAACTTGTTAGATCTTGTGAAAGAT
>c19223.graph_c0
GAAGACTGATATAAATTGTTGTAGGGTTTGCGGTTGGCAAGAAAAGGATTCCAGAAAGTTCGAAGCGATCAAAAGCATTCATAACATTTTTGTACTTTCGCCTTGATCGATGTTAGATTAAATGTTGGCATTGTGATCCCCTAGAGTCCCGACTATACATACTATGATATTTGTCACGTAAATGTCTATTCGAGATCAATTTGATAAGTTAGTCAAACATTTATCGTATACAACTTAGTTGATATTTATATAGAAAGCATTAAATGCTTCACACAATATTCACATCGAGAGTTTTTAACTACATTATATGACGAAAATAACTTAATTTTTGAATAATAATTAAATTATATTTAATCGTCTGATATTATTGGAACTAAATTGGAAATAAAATAAATAAATCTTATATAAAACGAAG
>c19224.graph_c0
TTTGGTAAAGAGAGGTAAGAATTAGTTTGGATAAATATCGACGTATTTCGTAAAGCAAGGAATATCTTACTTGGTGCAATTGTACATCAAAAATGAGTCTTGCAAGACCATTACCACGCTATTAAAAACCTTGGTCTTATTAATGTTGCTTATTAAAGCCACCTATGATAAGATGTGGTTTAGCTTACTTACTATGACGTAATGGCTATAAAGCACTAATCATTGTATGTGCATTCTATTCGCGTTCAAATTCGGTTATACATTCACGCGATGGAATGTCTTTATGACGCTATTTAAATCATCGTTAATAAATGTAAAAGTCAATAATAGA
>c19254.graph_c0
AAGACTGCGGACCCAAACATGTTGGGTAAAAGTGTTTTGGTCTTAAAAATGTTGGCAACGCAACGCATTTTTAAGGCACTTTGCCATCTAGGAAGAGTTCATGAGGGTGAATAGCATATTCTTACTCTATTGGACGCAACATGTGACATATACCTCAGTGACTTTATTCTGTCGCGCTTACAGTTACAGTGTTGTCATAAAGAGAGCAAGTAGTCCACTTTAGATTAACCGTAATAAATACTAAATAATGTTCGTATTTTGTTAATGAAAAGTTTTCGTAATACGAAGATGGCGTAAGCGGCTTGTTTGCATTTTGAATTAGAATATGAAAGACATTATTAAATGTTATATATTAGTAGGTATATTAATTTTGCTAGTCTTGTTGTAATGTTATTCTTAGACG
>c19277.graph_c0
AAAGAAAACAAAACAAACCTCCAATGTGTAAACAAGATGATGATCCTAATGCTGCCTGGTATGTCCCCTTCAATTCATGTATGCATAGGGTGCCAAGTAAAGAAACGGAAAGAGGATATCGGTGGCCTGTAGAGTGGCCTGAGCGACTGCAGACACCTCCATACTGGCTAAACCGATCACAAATTGGAATTTATGGAAAGCCAGCACCAGATGACTTCAAAGCAGATTTAGAACATTGGAAACGTTTGATAAGTAAGGTGTATATGAAAGGACTAGGAATTAGCTGGTCAAATGTGAGAAATGCCATGGACATGAGAGCAGTATATGGA
>c19279.graph_c0
AAAAACACATAATATAAGCTTACGAGAAGAGATATGTATATACAAACATAACTGAGCTATAATAGTCATGTACCTATTCAAATTTTAAAACTTAGAGCTTGGTTTTAGTCGAATGATAAATTGTGCGCTTAGCGATAATAGTTGAACGCAGTCGGAATCATTGGTACACGTCGCGTGGATTAAGTAAACACGCCAGTTGAGACCTAGTTCGATTTGGTTTGGGACAAACAAAGCTTGTCAATAACCCTCAGATTTACAAAGCTTTACAATGATCCAGCAATCCGTGCCGATTGAAACCAATAGTTGTCTATTT
>c19291.graph_c0
CGCCGCTGCACATTGACCATGAATAAGGCAGATGAGTACGGTTCGCATGAAGCGCCTTTTGTACCTCTGGAAGATTAAAGTAGAACCGTCTTTCATAGGTCATACACACATCCACTCCCATGCTCATTTTAGTAGCCATTTTCTTGAGCCTCAGCTCTTGCTGGACGATAGACGGATAACATACATCGAGGAGAACATCATAGTTGTTGACATACTCAGTGATAATGTTTTCAGTTTCACTAATAGCTTCATTGCAGGCCGTGCTTACGTTATGGGGGCTAGCAAATGTGTAATCATCAAAGTCACATTGACTCGTGATTGTGAGTTTTAGTTCATCAGAGATCATGCCATG
>c19301.graph_c0
GCCGAATATCTGATGTGATAAAAGTCCGGTGCCTAGATTTCTCAGCATCAACCCGCTGCTTTGACAACCGAATTATATGGGATAATAGTCCTCGCATCCTTTCCTCCACACACAAAGATAAGCACCGTTCGACATCATTGCTTATCTGCTTTAACCCGGCTTTAGCCATAATTTCCGCCAGCTTTCTTTGCAGAGGATTCTTCTGCAAGATTAATCTTTCTTCTTCTTCGTGCACAACTCTCCGAGATGCTTCGGAAACACGACCATCTTCCTTGGCCCCAGAAAATAATTGTTCTTCCTCTTCCCTGAGATTAACACCACTGACTGCAGTGACATCATTGAG
>c19304.graph_c0
AACTAAGTGTCGTAAAAGCACTAAGTCCGATGCCTATTATTCTGTCGCTCAAAAAATCAACAATTTGTCTACTTAATTTTTACAAAAGTTCATTTTGAATTCAAAACAATACGTTTCACTTTTTTTTATATTTTTTCAAATCTGCCCCTTTAAAAAAAAACAAATGGAGTCCGATCCAATTATTCTTAGAACATTAACTACGGAAGAAAAAAACTTAATACCAATCCAAATCCTTCAAAAAATACAAATAGAAATTAGGAATTTACATAATATTCACCAAACTGCTATGGCCACTTTTAAAAGAAAAATCAATGAAACAGAG
>c19309.graph_c0
GGGATTTATCTCAAATAAACCCCTTCTATTTAAAACATTATTATTCAGTTTAGTGCTAAATAAATTAGGAACTTATTAGAATGCGAAATTTACAAATTGAATTATTGGTGATTCGTTACGGGTAAATCCTACTATTTGAAGACGTTAAATTTGAAGATAGATTAGGGGTTTGTTAGTGGTGAAACACAAAACCTTACCTACATTTAGGAGATACATTGTTTGGGGATTTGTTGGGGAATAGCTTATTTTAAAAATACTATATACTGTTAGATTTAAGCCTAGACAAGTTGAGAATTTGTTAGAAATGGAATATTAAATAGAATAGGGATTTATTTGGGTTATCGTTTGCTTATTACAAGACTATTCCTGAGTTTACAATTT
>c19335.graph_c0
ATTATATATAACCGGCAGTATTTTGCCACATTGTACTTCTGTAGAATACATTTGATGTTTAACATTTAATATCCGGGATTGTAGTGAACGCGAGTTTGTTGTCAATTAATATTACGTCTTCTACAATAACAATTGCTACAATTTCAAATGAATGGAGTAGGAGAATATAAAGTTTGAGTTCTCTATATAATTAATACGGCAGATTTGAGTACCTTTGTAATCTTCCTTGTATAAATATGCCTAATTTTTCAACTTTCAAGTTCTCTTAGTTGTCAATTTTCGAAAGTAAAACAAGCCTATTCATGATTATTAAGTCGCGGAAATCATGAGTACTATCAAAAATATTCGTGCTACTTAGTACCTTACCACCGAAATA
>c19336.graph_c0
GGCAGGAGAGTGGACCCCTCTGTGCCCAGAGAGCAAGGCTCCAGGCTCCAACAACAGAGAGAACATGCAGGCAGGAGCAGGAGCAGAGGCCTGTGGCTATGGGGGAGGAAAAGTGGGAGGAAAGGGCACTGCCTGAGGAGTCCGGGAGTCTGGTCATCCCGGGGATGCACGCAGGAGCTTCTGGGCATCAGGGGCCTGCCCCTGGCTGGTTAGCGCTTTGACAGCTCGTGGGACAGCCAGTCCAGACCATCGTACAGACCTGTGCCTTGGGTGGCACAGGTGGCCTGGACATACCACGTGCGGCTGCGTAAGTGCTGTAGCCCCAGCTTGTCAGTCAGCTCGCTCACGGGCATGGCGTTGGGCATGTCCTGCTTGTTGGCAAATACCAGCAGCACTGCATCCCGCAGCTCGTCCTCCTGCAGCATCTTCTG
>c19364.graph_c0
ATTTTTCAGAGAAAGAAAAAGCGATTCATGGCAAGACTCCGTCCAACATCGTTCGGCTTCTTTAACGACGATGGTTGGTTCGTTTCCAGCATCAATTGGCTTCTTTAGTGGTGGTGGCTGGCTTTTGTATCCGGACGTGGTCCGGCTTTGCCGTCTTATCTCGCCGTCTGGTTTCTACTTTTCTCTTTAGTGGAATCCGGCTTTAGTTTCCAGTTCTTTGATACCGGTTTTACCTTTCTGCTTTTCAATAATCATTGTGATCTTAGTACCAATTTTTTTTTTGGGTTTTCCTTATCATCCTCTTTTCTCAA
>c19366.graph_c0
GTTCCTATTTCGTGTAGGCGTAGTAGGTTTGACTTCGTTCCTCGTTGCGGCATTTCGTCGAACGATTTGCCTACTGAGAAAAAGAAGAGCTTTGGGGAGTGGGTTGAGTTTGTGGGAGAGGCGGTTTCGACGGCGTTTCCGATATGGGTTTCTCTGGGATGCTTGTTGGGACTGATGAGACCAAGTACTTTCAATTGGGTTACTCCAAATTGGACCATTGTAGGTCTTACGATCACTATGCTTGGAATGGGAATGACTTTGACCCTTGATGATCTTCGTGGCGCTTTATCGATGCCCAAGGAGCTCTTCGCTGGCTTTCTGTTGCAGTATTCGGTCATGCCACTATCAGCATTTTTTGTGAGTAAACTCTTAAATTTGCCACCACATTACGCAGCCGG
>c19409.graph_c0
CCGTAAAACAGTAAAAACATTAAATGGCAATACCAAAAATTACACGTAAATTTATATATTCGATTAAAGCAAATGACAATGGAAATAATTTTACCTACTTTGGTATAAAACTTATATGATATTATTAAGTGGCAACACCAAAAATGATTGTCAGATTTTTATTGTCAACGTATCCTATGACATCTATGGTTCTATCCAACCATGATTCGGGAAATTGTGTGCACACAAAATGTTGCCAGTTTACGATACGTTATTTAACCCAAACGAATATAGAGCATTCTTTCTTGATCTTTTAGTGTAAACGAAAGATCGTTCTTAACGTTTACACCAAAATATCAGAATGAGAACCAAGAACTAGAAT
>c19435.graph_c0
GTGGGCGAGTGTGTGCCTGCATCCTGTGATGCGGTCGCTTTAGGCTCACTGTTAGCAGCCTCAGAAATTAAAGCGACTTCGCAGGCCAATGCTGTCGGCCTTTCTGCATCCTTCACTACAATCAACATACGAGCTGTTCCTGGCTCTTATGATCTATTAGCAGATTTTAAATTTCAAATTATTGGATCCGTGTTGATAGTCGTGGGAGTTCTGATGTTAGTGGCCTCACTATACGAAGGATACTTGGAACGTCGATTCCGGATAGCTGCAGAAACCGGAGACCTGGAGCTGGCACACAACG
>c19455.graph_c0
ATTAGAGTCACAAATTTAAGAAAAGAACGTAAATTGGTTTTAGTCTTGGATTTAGATCAGACTGTTCTTCATACTACTATTTCTAATGATTTTAAAGAAGATGTGGATAATTTTGTATTAGGAGGTGTTACTTATAATGTTAAATTAAGACCTAATATTCATATTTTTTTATCTTCTATTTATAAATTATATGAAATTCACGTTTACACAATGGGAGTACAGGCTTACGCTGAGAAAATTTGCAGGATATTAGATCCAGAAAAGAAATATTTTGGTGATAGAGTTATAAGTAGAAGCGTAAATAATGGTGAATATGTTAAAAATTTAAATAGATTGTTTTGTTTACATGATAATGTAATAATTTTGGAT
>c19465.graph_c0
ATGTTTATTAATTTATATACATAATATGTTGACCATTTGTTTACTCGGGTGCCACGTGGCGAGGCCAATGACCTCTCATATGATATTTTTATTTTTCATTTGTGTAATTCTTTGAATGTAACGCACTTAACTCTATAAATGCGACGTTGTTGTTCCGAAGCTTTTGGAACGCACTCAAAGAAGAATATATATTATCTGTTTTTTTAATGATTACGTACATGTAATAAACGATATTCAAATGAATTATCGTATGTACTAATACAAATAACTCAAAAAGTGAAGAAGAAATAAATAATCAAAAGGTTTTTATCTTGCAGTG
>c19470.graph_c0
GAGTGTACTGCATTTAGATGGGCAACATCTGCACCGTTTTCTGGGATTTCCTGTACGTGGGCGTTGACGATGAATTCATTCCTTCCTCGGTAAGCGAATTTTTTAAATTCCGGCGAGTCTTTCAGAGTCCATTGTGGTAAGCGATTTTCAGCGTCGTACCATATCCAGGCAGCGCCGTCCGCTTCCACTGTATGCCAGGTCTTTATGGACACACCCTTTGGAGCAGTTTCAACACCCGGTACGCTGATACAAGTGCCATCTGCACCGAATTTCCATTTGTGGAATGGGCATTCTATGCAGTTGCCACACACCGTACCGCCTATACTGAGGTTCGCTCCCAAATGTGGGCAGTAAGCGTCT
>c19476.graph_c0
AAAATTACAAACGCGACCGACTTTATCCGTCTTTTTTTTTACATATTTTAGAGCGTCCATACCTTTTTTTTATAACCAGTTCAAACAAACTTTCCAATCGTCGCGAAAAGTTAACAAATTCGATTGACTGTATCCGTCTTCGATCAATTTCTTATGAAATTCGAACAACAACTAATGATCGAAGCTATTCGTGCTTTTTTTGGTATATTTTAGTGCTTTATTATGTTTTTTACAAGCAGTTTCAAATAAACATTTCAATTGTGTAGAAAAGTTAACAGACTCGATTGAATTTATTCGTTTTTTTTATGTTTTAGTGCTTTATTATTATTTCACTACATACTATAAAACGAAGTCCTCTG
>c19477.graph_c0
GGGTCGTAGTTACTGTATTATCAGCCACGTTAATGATACAGGGTCCTCGGCTTACTGCATTATCAGCCTGGTTAAAGATACAGAGTCCCCAGCTTACTGCACTATCAGCGAGGTTAATGATACGGGATGTCCGGCTTACTGCAATACAAGCCAGGTTAATGATACAGGCTCCCCGACTTACTGCACTATCAGCCAGGTTAATGATACGGGGTCCCCGGCTTGCTGCATTATCAGTGAGGTTAATGATACGGGATCCCAGGCTTACTGCACTATTAGCCATGTTAATAATACGAGACCTCCAGCTTACTGCATTATCAGCCAAGCAAATGATACGAGGTCCCCGGATTACAGGGGTCAGCGAAATAAGTAAAAAT
>c19480.graph_c0
GCGTCAGCTTAATGTAGTATTGTCTCCAGAACTGCATAGTGGCCAGTTTATCCAGTCTCTGATTGAACTTCCACCTCAAATACAGCTGTGCAAAACCATTCCCCTTTGCTTGAAGTGATCCAGTTTTCAAGTGAGTGAGAAACAATACAACCATATGGGCATGAACATTTATGACATGCAAAACTGTACAAATTATTTCAAAGCAAAAAACGTTATCCTGTTTAAAATAAATGAGGTGGGGATGAGAACATATTTACTTGTAACGTGTAAGAGATTGCAGACATATTTAATTTCAGATTTATGTCCAAA
>c19508.graph_c0
TTTAAATTAGAAATATTGAGAATTATAAAAAAATATTAGTACCTGTTCTAATACTGGTTGAATTTTAAATTCTTATTGGAGGTTTTTAATTTTCCACCTTTTATGTACCTCTTAGTATTGAGTAACGAAATATGTTCGATATGTTGAAAGTATGAGCGCTTTTCGATATATCGAAAATGTAGATATTTCTGTTCGATATATCGTATCAATAAAAATATCGATAGTTTTTTCGTATGAACATCCCTACGATATATCCTCTCGATACACGGCGTTGTTTTAGAATGCACTAAAAGATACAAGAAAAGAGACATGCATACTTTTATTTTCTTTTATCCTTTGTATTCCATAAAATACGTTTTTGAAGTGTATAACTTATATCTTATTCAGTAAAATACTGTAATAATGACAACCCTAACTGAAATAATCATTATGATACGTCGCTTCAGTTCTACTATCAAAATTATGCAGATATGTATGAACGTGCGTGATTTTTATTATTATCCTAATAAATTATCGCTATCGGGCTTTTAGGTGGA
>c19515.graph_c0
GCGTCGATGAGTTCTGTTAAACGTCTCTGTTTCACCTCCTCTGGAACGTCGTCTGTGTAGTTGCGATGAGCATGTGTCTTTTCTCTCATGCTGTATGCAAACATATACGCCATATCGTATCCAACTGCTCTCACCAAGCTTAGGGTTTCTTGATGCTCTTCTTCAGTTTCTCCACAGAAGCCAGTTATAAAGTCGCTGGTTATAGCCACATCTGGTATAATACTCCGAATCTTTTTAACAAGATCCAAATAAGCTTCTCTGGTGTAACCTCTACGCATTTGTTCTAGTATTCTGCTATTACCAGATTGTGCAGGAAGATGGATGAGATTGCAGATATTATGTCTATCTCTCATCAAATACAGCAACTCGTCAGGGTAATCTTTAGGATGAGGCGATGTAAACCTAAACCGCATCTCTGGAAACTCTACAGAGAGTCGGTCCAAGAGATCAGCAAATCGCAAACCCATGTTTTTAACTTTACACCGGCTCGAGAATCCCTCACTGTATTCCCAGTTAGCACCTGACTCACGATCAGCTGAATCATCGTTATAGCTGTTCACATTTTGCCCTAAAAGCGTAACTTCTTTCACACCCGATTCCCACAACTCCCCAACCTCGCGGATTATAGATTCTACAGGACGTGATCGCTCTCTGCCTCTGGTAAACGGAACAATGCAGAAAGCACACATGTTGTTGCAGCCTCTCATAACAGAAACAAAAGCGGTAATTGAGTTTTCAGAGATTCGGACAGGGGATATGTCAGCATAAGTCTCTTCTAGAGAAAGAAGAGTGTTGATTCCTTTTTGACCATAGTCTACTTCTTCCAATAGCCTCGGGAGATCTCTATAAGCATCAGGACCACAAACAACATCAACCATTTTATCAGAATCTAGAATCTTGTCCTTTAATCTTTCAGCCATACATCCCAAAACAACAACTTTAGGAGGTTTGAGAGATTTTGCTCTTCCTGTAGCAGCATT
>c19524.graph_c0
GCCGATATGGCTTGAAAATTACGAATTCATATTATGTAAGCCAACATGTTTGAATTATGGTTGTTATATAATCTGAGTTTGCCATTTCGAATTCGATACTTGACAATTTGGTTTGGACAAAGCTTGGTTAAGGGTATTGAAATTAAGAACACAGAACATGGATTCTGAGATATCGTAGAAACTTTCTGGAAATTTCTAACAAAGTACAATATTTTGTTAGAACACTGAAACCATCAAGGCAAGACTTTGTAAGACAGAATAAATGCTCACTTTATAAAAGATCTTCAATTGCGATGATTGGTTGCAATA
>c19547.graph_c0
GGAGATCATGGATGAGCTCTCCTTCTAGGAAGCGCACTGGTTTCAGAGCCAGGAGATGGTCGAACAGATAGGTGTTTGGGTCTTTCAGCGCACGAACGATACATCTGTGTGCGTCCACACGGGCCTGTGAAGCGTTGTCTTCTGTATAACTGCCCAGTAACTCCACCATTACTTTGGCTGCAGCTTCACTCTTCTTGCAGTCGACCAGTGCTTCATACACCAGACGGAGAAGAGTGTGTTTCTTCTCTGTGTTCAGATTCCAGTCAACGATCCACTTCCTCACCTGGTCTAGGTCTGTAGGCATGAAGGCGATGGCATTGCAGG
>c19553.graph_c0
GCCCACTAGTATACTTAAATAGAATAAATGGTTTCATACGCAAAACACCCGACAATTAACTTGCAAGTTATCTTCCTAAATTTCACCAAAGACAGTTAGTTACATTTTAACTTGTGCGAGTAGGCATGTATGTAATATTATTCTAAAGGCAGACACAACATTACTGAAAATTTTAACCTCTTATTTTAATTCTAACTACATTTTTAACACAAAGGGAATCGCCCGAATGTACCTATATAGCGGGCTCCTGACATTGATGGCAAGATTAGTGTTCAATAACGTAAGCATCCGATAAGAATTTAATATACATTTTAATTTGTAAACTGTAAAGTCAGGTAATTAAAATGCATTGTTGTAAGCAAATCAGG
>c19560.graph_c0
TGTTTAATATTTTATTACAGGTCTTTATATATATCATATGAAATATTTGATTAAACTTGAAGTACGCCTTCGCGTTTCTAGAAATCTTAATAACTACGCCTACGCAATGGTTCGGGATTCTCCGCAATATTAATCAACAATCATTATTACCTCCTACTCGTTTCGATTCAAACGTAGCACAGCATAATAAGTGGTCTACATTAAACATTTTTTTTAAATATTATTACTTATACTGACTAATATTATAGAGTTCAAGATTTTGTTGAATACCAGTTTGAAAAAAAACATTTTGCGCTAGCTTTTGCCCG
>c19579.graph_c1
GGTTTATGAAATCAGCAAATGCCATTTTGAAAAGAGTATTCTGTCAAAAATAATTTACCAAAGTTCAAGATAGGCCTGTTCAGCAAAATCCAATATCATTCTCTCAGTACTTTATAAATGGAATTTTCTTCTACTTGTATCCATTTCCCGGGGCTTATGGACCCATTCATACTCTCCATATTTAGAATCAAAGGTTCCTTTCTGAAGAGACCTTAATTTTAAGGTAAAACGTGGTCCAAGTTCCTGAATTCCCACTTTCTTTTCACTCCTGAATAAGTATCTGTGAAATCTGAAGAATATGTAATCCCGTTGATTGTGGAATGTGGCAACCTGCCTTCCGATAAATTGAGGATTATGAGGAAAGAGAG
>c1958.graph_c0
TTTCGTCTTAAGATGTTGAGGTATTATAGGACACATATTATGTGACTTCCTAATCGTTTATCCAACCAAGTTAAATTCTACGATTTACGTCTGTCCCTAAGTTGAACCTATTGAACGAGACACTTTATCTCAGGTAAACTTAATTATAAAGAATCTTAACTAAAATATTTCCGTTCTTTACCGGAGTCAGTGTTACATAGGCGTTCGGTATGATTCTAACCTTGTTCAGGTTTTATGCTCACAGCCATGACCAATATTGTATCTCAGAATTACTTTTCCTTACCTTAATCTTGGTTATAACTTTAATACTAACAATTTTATCAGAACAGTGTTCACTGCATATCAATAGCTCGCTTTTGTGAATTAG
>c1958.graph_c1
ACATTCAGTGGTGACTTACGGAACTAAGATCTGGGTCGTAAGTAAATAGCACAAGGTCAACCATAGAGCAATTGAGGAGTGCTATGCTAACAATATTATCGAATCATAAATAAGGAGATACGTATAGGTCCAAAGTCAAGCACATAGCCCTTAGAATTACCAGATTGAAGTAACTGTGGAAATAGGAAATTGCTGTAAAATAGTCTATGGAACCGAAAAGCTTTCGAGTGACCACCAAGCATAAGAGAATGCAGTGTGAGTAGATTCACCACAAGATGAATCAACGACTTACTAAAGGTTACGAGTGGTTGCGAACACCACTATAGCGAATAAACTGACGATTTTTGAGAGAGGCCTATTCAATAGTGGTGATCTTCTGGCTAATTGGAA
>c19610.graph_c0
TGAAGAATGGGGAGTTCCTGTCCATGATGACAAGAGACTTTTCGAGTTATTAAGCTTGTCTGGTGCTCTTGCTGAACTATCTTGGAAAGACATTCTTTCCAAAAGACAACTATTCAGGTAACTAGTACCAACGCTGTTGTGGTTACATCTTCTGACTTCTCCTTATGAGCTCGAATCTCGAAATGCTTTTGCCTTGTGTTAAACAGGGAGGTTTTCATGGACTTTGATCCAATTGCAATATCTGAATTAACAAATAAAAAGATAACATCCCCTGAGATTGCTGCCACCACGTTACTATCAGAGCAAAAGCTACGGTCAATCCTCGAGAATGCTAACCAAGTTTGCAAGATAATAGGTGCATTTGGATCATTTGACAAGTACATTTGGAACTTCGTTAACCAGAAACCTACTCAGAGCCAATTCCGGTACCCACGTCAAGTCCCTGTGAAGACTTCGAAAGCCGAGTTGATAAGCAAAGATCTTGTACGCAGAGGTTTTCGCAGTGTAAGTCCAACGGTTATTTACTCGTTCATGCAAACAGCTGGTCTCACAAACGACCATCTCACTTGCTGCTTCAGACACCATGACTGCATGACAAAGGACGAGACTGGTAATTAAAGAAAAACCAAGA
>c19641.graph_c0
GGTAATTAATGAATATAATTTATTGTGAAAAGTTATGCGGATGAGTCGACCAATTAAGAGTACATCTATGGAGAAGAATTTTAGTATACATTTGTGACGAGTGGGGCTTAAAAGAGGCGATACATTGATCCCGTATATGAGGAAATAATAAAGAGGGAATCACAGAGCGATGCAATATTATTAAGATGTACAACTTGTAAACTCTTCATTTTTGAAGTGACGTCATATCTATGGTACTTGTGAACGAAGTGACTACGAGAAAGTCACATATTTCACTTTAATAGCACGTCTTTCTTATTACAATATAGATTTAGATAACTGAGAGAGACAAC
>c19646.graph_c0
GCAAGATGGATGATAGCAGGTCAGGCAGAGGAAGTCATGTGCATTGCATGAGCTAAACCTATCTGAATGAATTGATTTGGGGCTTGTTAGGAGCTTTGCGTGATTGTTGTATCGGGAGGCAGTAAGAATCATCTTTTATCAGTACAAGGGACTAGTTAAAAATGGAAGGTTAGGAAAGACTAAGGTGCAGGGCTTAAAATGGCGATTTTGACATTGCGGCATTGCTCAGCATGGCGGGCTGTGCTTTGTTAGGTTGTCCAAAATGGCGGATCCAGTTCTGTCGCAGTGTTCAAGTGGCGGGAAGGCCACATCATGATGGGCGAGGCTTTGTTAAGTGGTTAGCATGGTGGTGGACATGTGCGGTCACACAGGAAAAGATGGCGGCTGAAGGTCTTGCCGCAGTGTAAAACATGGCGGGCCTCTT
>c19649.graph_c0
GATAAATGGCAGAAGTCCATAATCAACTAGAGATCAAGTTTCGGTTAACCGATGGTTCGGATATCGGTCCTAAAGCATTCCCTGATGCTACAACTGTTTCGGCTTTGAAGGAAACTGTTATTTCTGAATGGCCAAGAGAGAAGGAGAATGGGCCGAAAACAGTGAAAGAGGTGAAGTTGATAAGCGCAGGGAAGGTATTGGAGAACAGCAAGACGGTTAAAGACTACCGAAGTCCTGTCTCTAATCTCGCAGGCGCTGTCACCACAATGCACGTTATCATCCAAGCTCCGGTTACGGAAAAAGAAAAGAAGCCTAAAGGTGACCCGAAGATGAACAAATGCG
>c19672.graph_c0
AACTTCACATAATTATTTTAATTATATTTCTGCATATCTTCATTTCCCCGTTATTACTATTAATCTCTCGTATATTTCAAATACAGTAAAAACCAAAACCACTAAGAAGAAAACTCTTTAATCGAAATATATATATTTCGATATTTGAACACAATAGGATCATAAATATATTTTTTGTCCTAGCCTCCATTATAACTTATTTTCTCGTTTTGTTTTATCTCGTTAATCACATGGTTACATGATTATTATATTTCAGTATTTAAACCCTATAACATAACCAACCATAGGCATGATCTACAAAAGGAGAGATTGCAAAATATATCTCTGGTTAGGAGTTCTTGGCGGGATTTTGGTCTGCCATGTAGT
>c19679.graph_c0
GGAATTGTCAGATTGCAAGCACTTGCTCGTGGGAGAGAGATCAGACATTCAGACATTGGAGTTGAAGTTCAGAGGAAATGTCATTTGCATCATCAGCCTTTAGAGAATAAAGCCAACTCGGTTGTTGATACACATTCTTACTTGGGAATCAATAAGCTAACAGGAAATGCTTTTGCTCAGAAGCTTCTAGCTTCATCGCCAAACGTGCTGCCTTTGTCCCTCGACAATGATTCTTCCAATTCAATCTGGTTAGAGAACTGGTCAGCATCTTGCTTCTGGAAACCAGTTCCTCAGCCAAAGAAAGCATCACTCAGAAAATCTCAGAAGAA
>c19744.graph_c1
GGTTATTTTCCCATAGAACAGATTCTTGCAGATTATTTGAATAAGTTCCCGGTCACTCAGTTTATTACTCCTATGACTCTTGAGACTGAGAGTGAGGGAATACTCGAGCTTGTGAGCCATGTATCGGAACCAAGTCGAGATTGAAGCCATGACCAAAACCCTTAAAATGAATTTCGCTTTTAAAAAATAAATGCTAGAGGGTTTCGAAGCTGGCTTCTCCGCTTTGTCGGTCTTCTCCGCCTCGTCGCCGCCGTGGTCGATAGGAACAGAACAGCAACAACACAACCCTATGGGTTTGGTTT
>c19745.graph_c0
GCGGTGGCCTCATACCATAAGGCGGTGGAGGACCTCTTCCCATAGGAGGACCTTGACCACCAAAAGGAGGCGGTGGCAACATCTGTCCCGGAGGTCGAATAATCGGAGGAGCTGAAAGCTGTGGTGGACGAGAGATCTGAGGCTGCATCATTCCCGGAGCAGGTCCACCAACACCACGAACAGGACCAGATAAACCAGGCTGAGCTTGAACTAACGGACCAGTAGGAACTCCACGCCCAGCGGCACGGCCAATTCCTGGACCAGCAACAGCAGCTGCAGAGCCAGCTTTAGCACGAGATTCTTCAGGAGGAGGTGGTCCTTCG
>c19765.graph_c0
TGGTTCGTTACTCCGTACCTACTCATCCCTTTTTTCATATATTATGGCCAACTGTAGTTTGTAAAAAATGTTAAGAAATAGAGAACAATACATAAAAATCTTTGTGTAACATATAGGTATGTACGTATGAAAACGATTTTTTTTCCTGTAGGTATTAACGCAACATCCTAATAACTAAGATAATAAAATATTAATTGAAATAATAAATACGAATTCTAAATTTTATACAATTTATTATTATTTCGTTGTGAAGAATCGTTTTTCCAATATATAAGGTAACAGTTAAAATAAGTTATATTTACGTATTTA
>c19786.graph_c0
GTTGTGACATACGAGGGCAGATCAATTGTAATATTTTTTTTACTTCCTCCCTACCTGTAATTTATGGTGCCCTACCTCAAATTCAACTCTACAGCCCTGATACAGTATTCGCCAAACTTTTGGACTGCGCTGAACACCAAGTGTTATATTTTAAGTATAACATCGAGACAGCTAAGCATAAATAAGTGGCAATCATAGATGCCTCTAATATTTTAATGCTGTGTCGTATTAAACTCTTGGTAATATTGTGCGTAAATCCGAACTTACGGCTTTATTCATAGCATTATAATTATATTTGTAGAAATTTAAGACGAGTCCGACTGTATTTGACTTGTGCGGATGAAACAGAAAAATACATATGACTTTGAAGGAAGCAACAGAGATTCGTTAGGATAGAAAAGCGGTGCTCTGTTCTTTTTGCCGGGTCCGTGACCTATTATACTATATACAAATATTATATATA
>c19789.graph_c0
AAAAGTTTACTAACGCTATGCCCTTTGGATATCCTGAATCCTCGATATAAATCAGGAAGCGTAAAGATTCACGAAACCAGACCAGTTTCAAAGGCGCGTCAAATATTTGACACCAACCCTGCGCTGTGGCCTTTAAATCAGCCGATACCAAAAGTTGAAGCCTTGATACAGTGTGCTGGAGAAGCCAAATACACTGAAGATTTACCTAAATTGCCAGATGAAGTATTCGCTTCACTTGTACTATCAACTGTAGCTGTTGGAGATATTGTTAATATGGACCCTTGTGTTGCTTTGAAAATACCAGGAGTTATAAAATTTTATTCGGCCAAGGATATTCCAG
>c1979.graph_c0
GGTAGTAATTACTTTATTAATAATTAATTTCTTGTAATGTTTGTTGTCAATTGTCTGAAGGTAATTTAAATTTGATGTTTGGGGTTAAGATTATCTTTTATTTTTTAATACATACATAAATGTAATACATTCTTTTATAGGTATGTGTAGATATACAATATTCTATTGATCATAGAGTGTTACAAATTTATTTACTCAGTATTGTCTTTATGGAATTACTAGATACTGTTAGCTGTTCCGGCAGATGATTAACCTTTTCAGAATCATAAACTTCTACATTTCAACACAGTTTTTTTTTACAATATCAAACGCAATCATACTTGAAAGTAG
>c19797.graph_c0
GAATATCTTTAAACTCTCACAAGGAGAGTATGTTGCGGTGGAGAACATAGAAAACATATACGGTGAAGTACAAGCTGTTGATTCCGTGTGGGTGTACGGTAACAGCTTTGAGTCCTTCCTAATAGCTATCGCCAACCCAAACCAGCATATCCTTGAACGCTGGGCTGCAGAAAACGGTGTGAGTGGTGACTATGACGCTCTCTGTCAAAATGAAAAGGCAAAGGAATTCATTCTCGGAGAACTTGTTAAAATGGCCAAAGAGAAAAAGATGAAAGGGTTCGAGATCATCAAGGCGATTCATCTTGACCCAGTGCCATTTGACATGGAACGAGATCTTCTTACGCCGACCTTCAAAAAGAAAAGGCCTCAGTTGCTGAAATACTACCAGAGTGTGATCGACGAAATGTACAAGACCATAAATGCAAAATTTGCTTCCAGAGGGTAGATTCCTCCTCACTCTCGGTCCTTG
>c1980.graph_c0
GCCGGTTAATGATATATTCCTTGCCTTAATATCCCTCCATAATAGAAGACAATTATACGTATAATGATAGAGATATACAACTATGTATCTAGATACGTATCTACTAATAAGCATTATAAAGGTCAGGTTATGAATAACAGACATAAATGACACCTGTGAATATTGGATGAAACTAGATATAACTATGAATTTACTTTAATTGGACAATGTAATTGGTGACACGATTAAAGACAATCACGATCTTAATTAAGAATTAGCAACTTATGACAGAAATTGGTAAAGGAATGAACAATGATGTACAGATATTATAATGACTTTCTT
>c19802.graph_c0
GGGGCTTTATGCATGTGCTCTCTTGCGAATCTCCTATCATCTTTGAATAAACGGTTCCATCGTTTGCTGGTAGATCGTAACCGTTTCAGATTCCTCGCCGGAACGCGACAGAGTATCTCATCGACCAAATCGTTACAGAGATCCGGTATCGTCATTGATCTCTGCCGCAGGCGCCACGGAATATTATTTATTTTCTAGGGTTTTGCTTTTCTTCAGCTTTCCTCTTGCGAGATATATACATAGACTGGAAAGAGGAAATGTAACAAATTGCTCCCTCAATTCTGAATATATTTTCATTTTTGCACCCTCAATCTTGTTTTCTGTAGATTCTATATTTGTAAATCAATACACACACGCTATGGAAAACCAAGGATTCAAGAGAATATTTTTTACACTAGAGAGAAT
>c19803.graph_c0
GGTTATATTTATCTCGTGATTACGATGTTTACGATGATTGTATCTGTGTACAATTAAAATTAATGTTTTTTTTTCAATTGCCAAGTTATAAGACGGACCTAGCTACGTTGCTACTTCTGTTTATAAACAGTTCATATATACAGGACGGGAAAAATGAATTAAATTGTGATAGTCAATTTTATATCAATGAGACATTTTATCGTTATTAAAAATAAATATAATCGTCTTCACAGATTTAAAAAAAATTTAACTGAGTCGAGTATCGAACCAACTAAAAATGCAAAAAACAGGCGTTATAACGATAAATTGTACAAAAAGAGCGGGTCTATAAATATAGACACTATAGGTGTCTCACAATTGAAGAAGACCTTGGACTATAAGAATCTGTATAACTAACAGGGTTAGATACCTAGA
>c19805.graph_c0
GTGCAAAGGATCCGTAAGGCGAAAGATTATAGGTACCATTTCTTGTTACCTATAATAAAGAGGTAAGCGTTTTGTAAAAAAATCGTACGTTGGTCATTTTACGTCCGTTTAAAGCAAAACCTTTTTTTTATTTGCTTTTTAAATATCAGTTATTTTGTTAATTACTCATTTTTATGTTGTTATCTTATCAACAAAAAGTTTATCCAATTATATTAAAAGTAAAAAACTAAAAGTAAATTGATTATTACATTGAAAAAATTCCGTACTCAAAAAAACAAAAGTTACAATTGAATGATCGCTCTTTAGG
>c19819.graph_c0
ATGATCTCATGTCAATGGAAATCGATGAAGGTGTCTTAACATCTGTCACTATATCTTCCGAGCCATTGTATTGTGGCCTAAGTGTTCTTTCCAATGTTATTGTGGAAACCCCTACAGAAATCTCACGAAAGGGCTCAGGAGATCAAGGTGCTACAATGCCTAAATTTAGTTCAAAGAATCAAGATGGAGTGATGCAAGCTGCAAACAGAACCAGAAATTCTGGCCTTGAACCTGAAAGTGCACCTTCAGGTTTCAGGTACCCTGAGTGTCTTCACCATGTTCCGATTGAGGTGTGTACGGAAAACCCTATAGGCGTCAGTGCACCACGAGGAAATCCAAATTGCCATGCAGAG
>c19821.graph_c0
AATATCACGGATAGCTCATAGTATTAATTAAAACAGTAACAAAAAGCTTTAGTGTCTACATCCTCCTAGTATATGATACTGAATTAATTATATTTAGGTTTGTACTTATTTAATTATATTGCAGTTATTTCAATAATACGTCCTGTAAGTTATTATTATAGCACACGTACACGTGAATAGGATGCTAGGTGTTAGCGTTGAGGCATTTTAATGTGATATCTGGCAACTGAATCAACTTGGGCAAGTGCTAGACATTGGCTCAGTATAAAATGTGACTATTAACCATTTCTTTTTAACCAGT
>c19839.graph_c1
GTCCAAGTTAGTCATGCACATCTCCAGTGTATAAACTGGATTCACATTATTGGCATCGGCAGATTCAGCTGAAGCAGAATAGACATGCCAGTTCTGTTGTTTATCAGCACTACCCATCACATATGCACTGCTGCCTGCACCAAGCTTACCAAAATAGCTGTCAAGCACGGCCACTTCTTCGGAGAAGTGACGATGTGGGTATGGTTGAGCCCCAGGAAAGATGAAACTACCACGAGTGTACCTCACAGACTTCACTTTCAGGTCAAGTGAGTCAGCCGACGTAAGAATGGGCGGGATCGAGAGCAGCAGTTTTGTGGTGCCACAAGTTTTGATTATGATCTTGTAAGAGTAGACAAAGA
>c19849.graph_c0
GTATGCACTAGTTTTATGAAAAACCGGTCGGTCTTGAAAAAAAAATTACTGTTACATAGATATCCCGCCAAAAATTTTAGGTTATAGATATTATACGCTAAAGATCATAAGAACCAGAGTAGGAAGTTAACAGAGTGATATCGTGTCACAACTAGCTACTTAAATTTTGCGTTCTTCAAACAAAAATATGTTCGTAGGTGATACAAATACTATATTTTATTCATAAAATCGTTATACTTACACTTTTATTTGTCTCTTAAACATTTTTCGAATTATTTTTACTACCGCAGTCTTCATATAGAAGAATTCAATTTTATTAACCTAAATTAATGGATTTTGATGGAAATTAAAAAGGAATGTTTGAAGACGCTAGAC
>c19853.graph_c0
GAATCATCACATTAATTGAATACAACAATGAATCTATACTTACATACGCAATACACTTACTTATTTTAATGTTTAACTACACCAATATTTACCCTAATAGCTTATTGACCTAAATTTTGACCTAACGTGTCTACGCGAAGAATTGTGCTAATCTAAAAGGTGTCTACAAATTTTCTCATAGTATTTTTAAAGACTTTTGTAATTTACAGAACGTTCAAAATCACAACACAGAGTGTAATATCAATTATCGTGCGTTTGGCACGTGTCAATTAACCGTCTACATTTATATTACAATTAATACGTATTAGGTACGTAAGTACATCGAAGAGAGCGTCGCGCGTACGTGCACGTGTACGTACGTGCGTGCGTGTACGTACACGCGTGCGTACTTGCGTGTGCGTACACGTGCGTAGCGATTATACGCGATACGCATGCGCACAACTCTATAATTATTTATTTGATACAAAATTAGAAGAATATAATATCCATTTAGATTTACAAAATATTAATACTATAGTAACATC
>c1988.graph_c0
TGTGGAAAGCAGTGACCTGATTGCTTATGGTTTGATTCCTGAATTTGTTGGACGATTTCCAGTTCTCGTCAGTTTGTCTGCTTTGACTGAGAACCAGCTTATGCAGGTGTTGACAGAACCCAAGAACGCTCTTGGAAAGCAATACAAAAAGATGTACCAGATGAATAGTGTAAAGCTGCATTTCACAGAAAGCGCACTGCGGCTTATAGCTAGAAAAGCAATAACGAAAAACACGGGTGCTCGTGGCTTAAGAGCTCTTCTAGAAAGCATCCTCATGGACTCTATGTACGAGATTCCGGACGAGGGTACAGGCAGCGATATGATAGAAGCGGTTGTG
>c19883.graph_c0
GTATTATTTCACTTGTCCTACGTTCGCATACATATTCATAGTGCACCACGGATTGAAACAGTTTGGGAACTCCTGCCTTCATAATGCCTCCTGCCTAATTCACACCACATAGTCTACAACTTCACCTCAAATTATTGTCAAAGAGCAAACATTATAAATAAATCGTGATCACAACCGTAACTAAATACACACAGGATAACAGATTTATTTATAGTAACAATCGTCCAAGCACAACTTTTACCATAATAAAGAATAAAAACTGTATCCTGAACAATCTACAAATATCGTATAATCGAATATTAATAATCAATTAATAGACATAAGAAACGTGAAGTATGGCGAATAAAAACTTGTAAATAAAAACTTTCATGTTCCTTTTTTTACTGATAACACTAAAAGAATCGTTTGACAAACAGAAGAAAAAAGTGCTGAATTGTTTTGTCCTCGC
>c19903.graph_c0
GTCCTAATAAATACAACAAACTTTTAGTATCAAATTTGATTTTTTGTAAAATGTCCTTTGCTTTAAGGGGGTCTGACTTAAGAAAGGCGCCATAAAAAAGGGCGGAGATGAAGGAGTCAGGTTGAGATTGGATGTAAAGAGAATATAGATCATTAATTTTAGATTTAGAACATAATAGAATTGAAATTATAAAGGAATCCGGAGTAAGGGGGAGACTTAAGAGTAAATTAATAGAATCATCAACATTAATAAATTCATTTTGATCATTATAAACATCAACTAAATTATTATAAATAACTTTTTGAAGCCAAATTTTATCAGCTT
>c1991.graph_c0
TATCAATCCGTCAGTATTATTCATCATAATGTGTGTTATTATATTTTGTTTTTTTCAATCATGTTATAGGAAATGTTTTTAAAACTTTGCTAATGTTTCAAATAGGTCATTGCAAAAAGCCTAGAGACACTAGCGGAATACATCGACAGGTAAACTGATTTTAAACGTTGCTTAGATAGCGGAATGAGCATATAACAATATTTTACCATCATACTATAGTGTCGTCACTGTGTTATGTTTCACCGAAAGCTAAAGTGAATTGTAGAGTACAATGCACCGTCAACCGACATGGAGTTCTAGCACTCAACCAAGG
>c19922.graph_c0
GGCCCGTCAAATCATACAACTTAATCTGTACAAAATTAAAAAAGTTAAAAAATGATATTTATTACGTGCTCTATAAGTTTACCAGTTGGATTACAAAGAACATCTTTTGCTTTTTATAGCCAGTTTATTGAAGAAAGTTGAACGGTATTTAACATCATGCTAAGATCCTTAAGAGTCAAGCATTGAAGCATTGTAGCAATCAGAAATTGTAGGTCAGAAGGTACACTAACATAGAATGAAAATTAAATGTTAAAGAAGCCGCAGGGCACAGTAAGTTAATACTAATTGATAATGAACGAGTTAAGTAGAAAAAAAGATGTGTTTTATGATTTACATTGACTAATGGGATTAAAAATTAAAAAAAGTAAAAATTTCGAGTATCTTTTGTTTAAATTACAAACTTATCGCCGAAAACTGGTTCGGACTTGTACATTTGGTCTATCAAATTGGTATATATGTCGGTAGGCGGATAAGAGTGATCGTCTTCGGTAGAACTTAAACGGTGGATCGGTGTCGCAAACGTATTCCAATCCAGAAGCACTGGTATAAAGGCACTAGGAGTAGGCTGTAGACAATCTCCAGAACAGGTGTTATCCAGACACGATTGGTGTGCTAGACGGAACTGGGAGAGGTTGGTGCCCGTTCGTGTAAGCGATCAGTAAATGACGTAGAAAAAAACTGAGATACGCACAAAAGCGATCACCGGGAAAGTTGAA
>c19928.graph_c0
TTTTTTTATATAAATTGTAATAGCTCTGATGGAAAATGAATGAGAAATTGAATGGTAAGCCAATAGAGATGCCAGCAAGAGGAAGACCAAGAAAGAAAGAAACGGGATTGGATTATGGTAAGCCAATAGAGATGCCAGCAAGAGGAAGACCAAGAAAGAAAGAAACGGGATTGGATTATGGAAGTTATGGAAATGAGTATGAGCCACAGAAGCCCCTCTACGCCAGGCATAACTTCTCTCAATTCATGAATAGTGGTAGTAGTGAACCAAATGCAATATTCGATTACATAGAAGGTGGTTCCGATAAGGAGAGTGGAGGCAAACTAAGTAACATGTATCCATATAAGACTGAACAAAGACCTTATGATATGTTTCAAAAATTAAATATGAGACCAGAG
>c19937.graph_c0
GGGATTTGTTTATATATCGAGAAACTTAAGAAGGTGATCACTCTCCAGATTTTACTGTTATATAACGATCGTTATGCACTTTTCTTATTTTAAAGCTGACATTTATGGATTATAATAGATGAACTCAGGTTCATCATATACCAGTATAATCACATTAAAACTATTTTTATTTAATTTTTTCAACAACATCAACGCTTCTTTATCCACTATATTAAATTAACTTGTAAGCTGGTCTAGACTATAACAAAGCGAAATGTAAAAAAAAATGTTTACGTCGATGAACCCGTCTGAGTAATACTTAATCTATGAGATTCGCAGTTTATCAATGAAGATGGTCGATCGTATCGGTGTTTCGCCGCTTGCACCGCGCCGGGGAGGGAAAGTAGAGAGGTCCGTATATACTACCAGAGGCCAGCATCCCGCGTGCCTTATGGACAACCTGAAGTTACGTAATTATTAAT
>c19944.graph_c0
GATACAGCAGATGAAAAAAGAAGGTGTTAAACCCGACATTCATACTTACACATCCTTCATTAGCGCTTGTTCTAAGGCCGGCGACATGAATAGAGCTACACAAACAATCGAAGAAATGGAAGCACTAGGTGTGAAACCTAACATCAAGACATACACGACCTTAATAAAAGGATGGGCGAGAGCATCTCTTCCAGAGAAAGCCTTAAGTTGCTACGAGGAAATGAAGGCGATGGGGATAAAACCCGACAAAGCTGTGTATCATTGCCTTCTGACTTCGCTTCTGTCGCGTGCTTCAATCGCAGAAGCTTACATTTACTCAGGAGTGATGACTATCTGCAAGGAAATGGTGGAGGCAG
>c19948.graph_c0
GAGGATCCTCAAGAGACAACAAAGTCGGAAAATAATGTTCTTCAGGGTAACAAGATTCAACATCAAGGCATGGTAATTTGAATTTCCTCCATAGCTTTCTCTCTTTGATCACCATTAGAGCATGACGTTTCGCTAATACGAAGAACTGAGATCCAACACGGAAGTCTTGGTACTGGATCTCAGGAAGCATCGCGTCGTCTCCTCTTGCGTTGTATCGTTTCAGAAGGAACGGTTCATCGGAGAGGATCTCGATGAAGCTTTGTTGATGATGATCGGAGAAGAGGTGGTTGTGGATGTAAGAGAAGGAATGGAGAGGGATACAGTGTTGTGAGATTAAAGCGAAATAGAGATTGTTAGGATCGTCGAGGATTGCGTTTGCTAGTAATCG
>c19980.graph_c0
GTTGGTTTCATTCTGTTACTGTAAATATATATTTTCTTATTGTAAATACATATTAATTGCATTCGAATCAAAGAGGGACTAAATTGAAAAAATACAGTTTTATCAGTGCCCACCCGAAAATGTGTCCAATATAGCTAGCTACCTGTTACCTGGAAACGCTTTGACGAAACCAAGTTACATAATCCAGCTAATCATCTGATTTATGATATTATAAGTATCATATAATTTCGTTTGTTTATCTATACACAACTTCTATCTGATAAAATTTGAAGTTGGAAAAGTAAGTACGTTTGAGGAAAATACAAAAATAAATAAAAATAATGTCCTTCAACAAGTGTTTTCCAGTAAA
>c19982.graph_c0
AAAGAGAACATCCCGAGTCTCGACGAATACGACTCTCTTCCTCCGATCTCATCAAAAACTCTTTCGCTAAAGCTCTGTTTCTGGGCGTTCAAACAATTCCGGAGTTTGTCGGATTCTCAACTTCCGTATACGGAGAAGGTCGAGCAACAAGTAGTCAAATTTGTATAAATTCAATGACTGAAGAAAACGATTATGGAGGTAATCAGAAGATACTTCATCAAGGAAGTGGAACTATACCTGCTCTAGCGGATGAAGAACTGATGGGAGACGATGATGAGTATGATGATTTGTATAGCGATGTTAATGT
>c20014.graph_c0
GAAACGCTCAAACGATTTATCACGTTCGACATAAAACGTGAATCGAATGTTCGTATGCTTTGATTTGAAATTAGTAATTTATTTCCGAATGCTACATTGTAAATATATGGATAATTTGGAATAAATACGAACGAAAAAGGTCGAGGTTCTATTTCTTTCTAAAATTGCAAAGAAAGAATATAATGAATAATAAAATATGTTTACAGATTTTTTAATAATCGAATTGTGCAATAGCTGAACATAATTTTACGAAAATGCAAAAGAAGAATACCCTGACCTTCTATCAAAAGAAGACCCAGATCCTTGAATGAAAGCTTTAATATTGACG
>c20018.graph_c0
TTGCAATAAAATTGAACAACTTAAAAAGACTAGAATATGTTATATCGGTTTACTGTCCTTCATCGGTGCAAACACAATCTCGAGACTGGGAGGCACTTTTTGCTCTCTTTCCTTTAAAATCATTAATCGCGGGTGACTTTAATGCACACCACTCAAATTGGTCCTACAAAATAAATACTAGAGGCCTGCAATTACTTGATGCTGCGTTAGAAAATGATTTTACCACTATTAACAATGGTGAGCCTACAAGAATTAAACTGGTAAATAACATTCTACAGCAAACTTCTCCAGATATTTCTTTTGTTTCAACAGATATTGCAATAAATTTTGATTGGAGGGTGAGCAATGAGCACCTGGGTAGTGATCACCTTATTATTATTATGTCCATAAAATGTCCTAGTAGCTCTCAGGTCAG
>c20023.graph_c0
AATAAATTTTACAAAACAAAATTAATAGTTCATATACTCATTACCTAATATCGCAGTGAAGCATAAGCTTACATGGAAGTCGTGATCAAAAATAAAGAAAAATAAAAGTGTCGAACGAAACAGATAATTGTGTGTGATTTGTAAACGTTTATATTCTAATAATTATTTGATGTGTTTAGTTTAATAAAAATAAATTAACAGGCATGTTAAAGAGATTTAGCATGTTCTTACGGCACTAACACGAAATTAGTTTTTAACTCGGTTTTAGTCGATTATTCGCGATACAGAATTTGTTTCCTAGTGCGGGAATCTAAATATTAATTTTATGCCTTGATAAATCAATTTCTGTT
>c20027.graph_c0
ATTCCCCATGGCTGGCGCAGAGGCTCCAGAAGCTGATTTTTCTGCTTTTCCATGATTTCAACTTGTTTCTTCTGCAACTCTTCATTCAATTCTTTGAGTTGCGCAATTTCTGCTTCCAGTTCCATCGTATAAGCTTGCTTGCGAGCGCGGGATCTTGCAGCTGATTCCCTATTCTTTATCATCCTTTTTTGCCTTCTCTCAATCACTTTCTCCAGAACTGCACCTGTTTTTCTCACTCGCCCAAACATGTAAGGAACAGGGGACAAAGATGCATCCAGGGCGCTCTTTGGAGTCAGATCAGGTGACATCTGGCTTCCAGGAGATACTGCTGCAACCGTTACTCCTGTTTTAAAATCGACAGCTTGCAGTAGATTGTTG
>c20032.graph_c0
GATTCAGACAGTCACTGGCAAAGATTGTCAAGACATTGCAAACAAAGGTGGTAAGGTCAGCGGGCTGTATTATGTGAAACCAGCCAGAGCTCCTGAAGCGTTCCTGGTCTACTGTGAAATCGACAGCTTTGGACGTGGATGGACTGTACTTCAGAGGAGGCGGGATGGCAGCGTTGACTTCAGCAAAAACTGGATCCAGTATAAGGAAGGCTTTGGTTACCTCTCACCCGATGACAGGACTGAGTTCTGGTTGGGAAATGAGAAGATACATCTGCTGTCAGTTCAGTCCAGCGTGCCTTATGTGCTGAGGATAGAGATGGTCGATTGGGAAGGCAACAAAAAATATGCAGACTA
>c20042.graph_c0
GACTAAAGCTCATTTATATAACAATACTGTTTATACATATACATGTATATATTAACATGAATACATGTATGTATTCATAAATCTCGAGATAAATTACATGGACGTTGTAAACCGCAAAGTGACTAACTAACCCGCAAATGGTCAATCGCTCGTTAGTCAATTAGTTTTTCTAAAGTCGATGTGATTATATCGCTGCTAAGAATATTATGTATGAACAAAAATAATAATAACAATAATTATGGAATGCTTTGCTTAGGCGGATTAACACAAAGTCGACATTTTAATTATCTAATTAACATATAATATTAATATTTTTTTAAGAACACGAAACATGTGGAACATATGTTGAGCATTTATTCAAATACTTATAAAATAAGGTTGTATAAATT
>c20056.graph_c0
GCGGTGCGGTTATGAAAAGCAGAGGAAGGGATCAAATTTAATTTAATAACTAATAACTCATAATTATTCTTACCTATATCAGTTTACTTGGAACTCCAGTCTGCATCTCGCCTTTTTATGTAAAAGTAGGTGGTACCAAGCTGTAATTCTCCCCGCCTCATTGGAATTATCGTTCAACAATTACTTAGGAAGGGTAACATAATTGCGTTTTAATTAACGGGTGTGGAGTTCAAATTGATTCGATTTTGCTAATGCTACGCAGTTTGGAGACCGCATGTAATATATTACGGACACATTACCAT
>c20073.graph_c0
GCCAAGTTTCCTTACACTTAGTTAATATAGAGGTCCGGACCTCTCTTGTCCGTAAACACCTTTCATTGTAAACCCCTCATTTATACCTTGTACGAACATATTTTATGAACAACTCTTGTATCATTAGGGTACATTTTTTTATCAGTAACAAAGTGGTTATCAGAAATAATTGAAAACACTAAGGTTTATAAACGAATTATTTGAGAATGAACATAAATAATGGTATAATGGATGCATTGATAGATCAAACCTACATACTATACTGTATTACTATCCACTTACTTAATATTGATAGTTTATAATACTTGAAAACCTATCGAGAATGTAACT
>c20089.graph_c0
GTGGTGAGCCTTCATACGAGATTTTACAAAAGCAATAAAGATGATTTGAATGTACGTTGGATTGTACGGTTGTGTTTATCGATTCTGCGTGAACTAGTGATGTGTAAGCGGACATGAGAAAGAGTGGCGGCGTGTGTGCAGAGCGTTGGGGGCGGTGATGCAGGCGGCACATGATGCACGCGTGCATTGATGGAAGAGTCATGGTCGTCGGGTGGCGCGCCGCTGCTGCGCACCAGATCTCTGCCTCTGGTGCTGGAAGCGGCAAGTGGAGCGCCCGCGCGGCAGGCCAAACTCGACCCTCGACAACTGCTCACACTCACTCGTCATTACTACCCGGAAGGTGGATGGGGGTGGGGAGTAGCCGC
>c201.graph_c0
GAAATTTATCCGTCTTCAATACGAGTATAATACAATGCTTCTTAATACAACATACTTGGGTACAGTGAGCAATGTTTTTGTACGGCTTTAAACTGTTACGTCACAATAGCGATGCTATTATTTATAACATGCCAAGTCTAGCCGAGTGAGGAATGCCGCTTAGCAACAGAGTAGCGGTGAAACCGGAATTTTATAGTACTTTACGCATCTAGTCGTAATAAACGGAGTTATAGAGAGAGAAATAACGGTACCTTAGGTTAACCTTATCGTGGAATGGAACAAGCGAATTTTGAGCGGCCAGTAGATTGATTTTCGTTTATTTTATAATCGAAGAATGCATCTTACCAAAGCAGAGGGCGTAACCTCCTCACCCTCCGCTCTAAAA
>c20117.graph_c0
AAAATATTATAAATACGGTAAACGATAACATACGATATATTTCAATTACGCTTAAATTGCATGGATTGTAAGAAAATTTGACATAGAAGTCAATTACATCGTGGAATAGGACATGAGATATGTTTCTTATCATTTTATAGCCTAGCAAAGGAGACGTGCGACAAATAGTACGAGAATGTACCTATAATTGAAACAATCTTCTAATGAACATAATTCCACACAGTACTCGTTAAATAAGTAATTGATTATAGCATTATCATTGAATTTACGTTTCGTTAACTACGTATTTATGATAATGCCCACGATGT
>c2012.graph_c1
GCATTTCTAAATACTGGCAACCCAATGATTCTTCAACAAGTTGTGACCGGTTAGTATTACGTCTCTTAGATGACTGATGAAGAAGCTCAAGAACCATAACCTGATATCCAATGATTCCTCCAATGCAGTCGTAGAACTGTTCAATTTCTTCCAGAAACGTCAAGAATTTTCTAAAATGAGCAATCTCCTCTGAATCTAAAACTGTACCCATCTCTCTTCTACCTTTATAGCCGCTACTATTCACATCGAATCTCTCAATCATCTCCACCAATGCGTAAAGTGCGTTCTTCACTGAGCTTCTCACTGTATACTCCTCCTCTTCTTCTCCAAATGCTTCCTCATAATTCATACATAGAGCGTGTTCTTGCCCCGCCGCGATAACACACTTAACGAGAAACATCTCATTCGAATTCAAACCAAGATAACCAAAAACCTTAGATAAACCGCCTCGATTCTCGCTGAAGAATCGACG
>c20122.graph_c0
GTACAATTTTGTTCTTCTTTAACATTCTCGGAACGATCGTACCGATTTGCAGAACGATTACACATTCTCCCGTGGATAGATAGCCACCTATTTTTCCCGCAAGTACTGGCAAAAGACACAAACCTTACAGAGGTTCAAAGTACAAAATGCAAAGTAACTAAGAGTAGACGATACATCGATGCAACGTATCATATATCTGGTACGTAATTCCCGGCGCATTCCGAGACGCACGTAGCTCGATGCAAATATGATAATAATGATCGTTTAGCGTCAATTGAGAAGGCTATTGAGAGACTATCAAACCGACGCGACGGTATCGTTTCACATTTACATCGAATTAATAAAGGGAATCGTACAAGAGATACTAACGGACAATGAACGCGTATAGCCT
>c20128.graph_c0
CACATTGTTTATGTCGTTGCTATAGATATATAGATTAAAGAAGTAGTATTAGAAGTCCGCTCTTGTGAAAAACTGAAAGCACATCACTATTCTCCAGAATTGCAACTAAAAGAGAAAAAGGTCAGACAAATGGTACGAGTTGGCTTAAAATACGTGTATCAAATAGCCATAAAAATTAAAAAATATTGTGTACTAGGGATGGACCAAAATATCTATAAATAAAGCCCGAGTGGCTTGATATTCATTTAAAATTATACCCAACAGACGATAGCAAAATTTTGTGACTACTATACTCATATAACTTTTAACGCTTGTCTGTTTCTACCACTGGAAG
>c20142.graph_c0
CTTCTTCTTCTTCTTCTTCTACATGGCAGGAGAATATTCCGGTAGCCGGAGTTCTAACACACAGCTTCTCGCGGAACTTGAAGCTCTAAGTGAAAACCTTTACCAGAAACCTCAGGTTTCAGTTGGAAACAGGAGAACAAACTCTCTCGCTCTCCCTCGGAGTTCTGTTCCGTCGCTTGTTACCTCTGCTGATGAAGTGAGTACAGCACGAGCTGAGGATTTGACAGTATCGAAGCCGCGGGCTCGGCGTTTATCGCTGTCTCCGTGGCGGTCGAGACCGAAACTTGAGGTAGAGGAGGAAGAGAATGTTACTCAGAGCAACAGGA
>c20146.graph_c0
ACTGAATGCGTTAAACCGATTAAAGAAGAATTTCAAACGGTACAACAGCAGTACGAACAAAAGAAAAGGGTTTACGAAGCCACATCGATAAGTATTACATCTCAAATGGAACCTCTTAAAAATAAAGTGAAAGCTTTAACTGACCAGCTTAATGTTAAGGAGGAGGAATGGAAAAAGTTGAGGCAAAAAATAACAAAAGCTGAAAGTTTACAAGAAGTCGTTATGTTTGAAATGAAAAATTCAATGCAGTCCCCAAGGCAACCATCTAAAATGGAGGTTTTAAAGAAAAAAGTTTTCGACTTGGAGCAAATTGTAAAGCATTTAGAAAAGGAACAACAGACAATCAGTTCACGTCAGGGAGTAGTTGAGGAACAAGTTCGTTTGTGGGAAAACACTCTTAAAATGTTGCGTTGTAAAATGCGTACACGCACAGAGACAGCCGCACGTCAGGG
>c20147.graph_c0
GGATAATATTAAAAGTAAACAGAAAATTTCGAATAATGAGAAAAAATAGTATGAATTCAGCTTAAAATATGAACTCAAAGAATCTTGGTTTAAGTAAGCATTACGAATGGTTGAGCCTATACAAGGTTCGACTGCAGGAAGATGTGGTTGGCCGTATGCCGGCAGACGAGCGACTCCAGCTAAATCCTCAGGGGTTATGATTGACCTTGGTACTGCGATTCTTTCCGTTATGTATAACTATAAATAACGCCTTAACATATTGTGGCCTGCATGCCCGTTTACAACTTCATACCATAAATAATACATCAATAAGGAATGAACTTTAACGTGACGGCGGAGAGTGAGCA
>c20156.graph_c0
GTCCTTACCTAAAAAAGCAAATGATCACGTTATCATAATCTAAAATAAAGTTACTACAATTTTTATAAATGTTACACGTTCAAGGATGTGAATTTTCTTGCCGTGGAGAAGTGGGACAAGCAACTAGTAACCCGATAAAATGAAACAGACGTACTTTCTAGGGAATTCTTTGTATTACTTACCAACATAACGCTTCGTTTATTTTGTCACTCATTTACTAACATTCTAGAAGCAGATGAAGCCATTGGTATTAATGCAAGAAGCATAATATCATAAAATAATATTACATTAATACTTACGGGAGATACGAGTGAAGTCATGCATCATAACGCAGAAATGTCTAAGCATTCTTA
>c2017.graph_c0
AAATGATTATAATTTGTGATAATAGAGGTCAAATATCATCTTTAGACTTAAATGGTAATCTTTTAAATGAATCTGAAATGTCAAAAAGTTCAATTACATCATTTTTACATATTTCAGACAATAAATACGCAGTTCTTTGTGCTAGTGGTGAATTAATTTATTTTGATGTCAAATTGAACTTGATTTTACAAAAAATAAAAGTTAGAGAGTACGCACTTAATTGTGGAGTATTTATGAATGGACATCTTCATCTTTCTGGTGTAGATAGCAGAATCATTTGTTATAAATTATCTAAAGAAAAATTT
>c2017.graph_c1
AATAACATCAATGTGTTCATTTGGCGAGACAATAATAGTGTTTAGAAAGAATTTTACAATGGAATTAGTTAGAAACATAACATTTCAGCCATTTTATCATTTAGAATTACCAAATCCAGTAATTCAAAGCACAATGCTTTTAGAAAAAAAATGTTTAGTGCTTGGAGAAGACAATTGTTTACGCGTAATAGACTTAGAAACCAACGAAATTATTAAATTAAATACGGAATATTCGATAATGTGTTTTGAAAAGAATTACAAACAAAATACGCCTTTACATTGTTTTACAAAAAATGGATTGTTAATTTCTCTTGATCTCAAAAACTGTAAAGAAAAATTGGAATCAAAAATTATCAAGAAGTGTAGCAGGACCATTACTTGTCTGCTTAAAAATGATGAAATGATTATAATTTGTGA
>c20171.graph_c0
TTCCCGTAACGACGTCCAACTCCGTTACATTTGACGTCTGTGGTCCGTAACGGAACGCTTGACCACTAACGCCGGCATTTGACAACGTACCTCCCACCGTTAACCCAAGATAATCAGTCCAAGACCTCGGAGCCAAACCGTACTCCGAAACGCACCGTTTCAATACATCTTCCCATAATGCCCCTCCGGAGACATCAACAAACGCCGTGGCATCACCGCCGGATAAATAACCAACCTCGAAATGATTCTCCGCCGTGGTACTCATATCGACAACGAGTCCTCCTTCCGCCATGGCTTGACCGTTGATAGAATGGCCGTTTCCACGCGCCGCCACCG
>c20191.graph_c0
GTCCGTTCTAAAATAGTTACTGTTTACATAACCAAGATATAATTATCCATTTGACAGAAGACTAGTATAGCAAATATAGACTTAGCCGCTAGTTCAGATGCTAGGAAGTACTAGCCTATAAGTACAATTATATATTAACTTCATTTGGATAAACAAACATAGAGTATGTTTTGTTTATTCCAAAAGCAACCTTATTGCTATTATTTTAAGTTTATAGATATAATTACAACACTTACGCTATTTATGTCATTGTATAATCGAACAGGTAATTTTCGTGTATATAGCACTATTCGGTTACAATAATCTTTGATAACTTCGATCTAATTTATAGTCGCCTAGCGATGGGAGCCAAACACTTCGGAAATCCCTTTGCGCGACTAATCCG
>c2020.graph_c1
TAGGAATGAAATTACTACTGAATTAGGTATCTCCCAAAGATCCTCACAATCAATAAAGGCCAATACCTTTAGTTGCTCTCATCCGATAGGTTAGTTGATTGGATCGGTAATCCTTACCAAGTAATTGGTTCACGCAAAAGTTATAAAATGTTATTCATGTTCTAAGTTCTGCACTTACATTTAAATCCATTGAATCACTTATATATTATACTGCTATTACGAAATGAGCTATTGTTTTCTAGACTATGTACGATCGGGCCTCAGTAAAGTGTCTGTAACAGTCCACAGAAATTATTTGGGCAAACTAAAATCAACAACTGTGTCATTTCCATAAAATTACTTCGTGGATAAGAAATATTTAGTTCATGGAAATAAAGATAAAAAGGAATATCACTATGTTAGCAACTGCCAAAGGGTCTGTAGTTTTCAGGTTCGATTTGTATTTAGTATACTAGCCGA
>c20209.graph_c0
CGGACACATCTCCAAGAGTATCAGGCTTTTCAGCTGAAGATTGTGCTTTCTCCGTGACAGAATCCTTTTCTTCCTCATCGTTTTGGTTTTGGTTTTGGTTTTCCTCGAGATCCTTTGCATGTGTTGCAAAACTCACCTTTTCTTCCTTCCTTTTGTCCTTCCCTTTATTTTTGTTCCGTTTCTGTTTCGCCTGTTTCTTCTTAGATTTCTTCTCTCGCTCGGCTGCTCCTCTTTTGGCCCTCTGTTCGGTTTCTGCCAACCACGCTTCCTCTTCCTCACGAATAAGTTCTTCCTGCCTTTTTAGCGCGATAGCTTCTTGATGTGCAACTTCGATTTTAGTGCTGAAGATATGGGAAAGAATAAATATCTCCACAGTTCG
>c2021.graph_c0
GGCAGGGAAAAAAAGAAAAAGAAGAGCAGTCTTGTCTCTGTAACGATTGTATTCTTCTTTAACTTTAAGCTGAACATCTTTACGCAAAGCTCGAACATTCACAGGTCCACAAAACATTCTCACAAAGCGTCCTTGTGGTTTGGATGGGAGAAATGAAGATGTTTCTCCGTCAACAAGCATGCATCTAGCACGATGCAGATCTTCCTCAAGCTTTTCGACGAGCTTAGGATCGAGATTTTTGTTGGAGACGATAGTAGAGTGGAGACGACGGATAGAGGAATCAACGGCGGAGGCTTTTTGACGGAGAGAGAGCT
>c20210.graph_c0
GCTTACGGGTCGTGATTTGAATTTCACCATTCCACCTGAAGCTAGTGACTTTGGTTCTTGGAGAAACCTTCCCAACACTGACTTTGAGCTTGAGAGGCCTACACCTTCTTTGAAGAATCCTACTGCAAACCACTCTAAGAAACTACTCAATGGCTCGGGGCTCAATCTCTCGACTCAACCATCCAACCATTCTAATGGTGAAGCAACCGATTTATCTCCTTCGAGCCACAAGAAGAGGAAGGACTTGTTCTCAAATGGGATTCATGAGGAGGAGTGTTGCTTAACTGTAAACCCACAACCTCCTGTTAT
>c20222.graph_c0
ATCTCCCACACCTGATAGCTGGAAACTTAAAGAAATTTTTGCTACTGGAGTCGTTCTAGGAGGCTACCAGGCCATCATGACTGTTATTTTCTTCTGGGCGGCGCACAAGACTGACTTTTTCTCGGACACATTCGGTGTGAGGTCCATTAGGGACAATAACCACGAGCTAATGGGTGCGGTGTACTTACAAGTTAGTATCATTAGTCAAGCTCTGATCTTCGTCACAAGATCAAGGAGTTGGTCTTTTGTTGAACGTCCTGGAGCATTGCTGATGATTGCTTTCCTCATTGCACAACTGATTGCTACTTTGATTGCGGTTTACGCCAACTGGGAATTTGCAAAGATTAGGGGTA
>c20235.graph_c0
GTAGAAGCTTATGACTTTGCCCGATAACTAAAGTAGGATTCTTATCACATTAACATATTTAAATATTTAACGGAAGAAGATAAACACAAAGAAGATAAACACGTCTCTCCTTTTATCTATAGAATTACAACCACTAATATGAAAGTCACTAATATAGGAAAAAGTGATTCAACAATGGACAAAAAGGTGAATGATATTGTTAATTTGTAGCTGATGAACTTGCACGAGCAAAGTCTTCTTTGTAAAACTATTATCTCTCAGGATATTTGTGGACTGTTTTATATTTTAATGATCTTACAATGCATTACAGTGATAAGCATTTTTAACAAGCAATTTTTAAATTGATTAGCAGTAAGGAGTTTTGGTAAAAT
>c20245.graph_c0
GGCAGTAATACAGGTAAATAATTTAGAACTATATTGAATGCATAGTGGGCTGCCTCTATACTCTGAAACCGTTCGCATGAAAACTTAATTCCTCTGGTCAGATTTATCAGATAAAATTTTAAATGTTTACTGTTAGTTTTATTTTTTGCACACTACAAGTACCTAAGTACACACTAAGAATAATAACATACAGTTCTCATAATAATGTGATTCTTCTTCTGGCTGTACTTATATGGGTTCACAGTTTTAAGTAAAATACATAATTTTGATTAAATTGATTTTTTTTAAATCTAGTGTGTTTGTAGCCATTGAAAGAAACCCAAC
>c20248.graph_c0
TCTCTCTGTTTGGTTGATCAGGCCACGGACTTGTTGCACGATGTTGTTCTGGATTTCGTGATACTCGTGCATTGACTTCCACATGTACATTAATCCGTGGCAGAGTTCAACAAGCTGAGGGACAAGGTCAGTGTCCCGGAGGCGGAGAATGGCATTAGACGTGGTTAAAACAGCTTCTGAAGAAACAATGATGAGTGATTGCAGTCTGGTTATGGAAGTTTTAGTCTTGTCTAGCTTGGATTCATCACCTCCCTTATACTCCTGACTCTGCAGCGCAGACAGCTTCTTCTCGTGCTCAATCTTAACTCCTTCTCTTGCCTTGACATCCTCATAAAGCTTCTTTTCCCAAGCGAGGAGTCG
>c2025.graph_c0
GTCGCGGTTGCTGTCAAAGTATCTAAATATATACCGACATCTCATTTCGGCCGGAAGACCTGTGTGTTGTGTATTAGGTTCTATAGCCGCCATCCACAGCATCAGCTCCAGGAATGTCAATCCACCTCTTCCAGCTACGTCGGCCGCTCTGAAAACTGAAGAGATTGGAACATTGCGTTGTTTGCCAGCCCAGGTCCACCATAAATGCGGTGAAAATCTGTGGGCTCATATACATCGCTGGGTACACAATCAACATAAATTCTCTATACATGCGTATCATCTCTTGAGTAGTTGGCGGCCTGAAGCAGTT
>c20250.graph_c0
GTCGGCTAATAAATCTAACAGTGTTAAAATAATGTGGCGTTAATTGAGAGTATTACTGCAATTGACTATATGTGAGAAACTTATGGTCTTATCATGAAGAATTGTAGATGTCATATAAGTCGCAGGTGACGGACATAAAGCAACGAAACTTGTGTAAATGTACATTTCGATATGTGGTATCTCCATAACCCACTTCAGCATGATATATGAGCAAGTAACTAATATTTTCAAATTAAACGCTAAGTCAAACAGTCCTTAAGATATCACGTTTTTTTTTAATATTGCATACAGTATAATTATT
>c20254.graph_c0
GTCTTCATTTTAACTTACAAAAGGTATTAAAAAATAATTGGTCATTTTTGACATTATTTTGACCAGTAGTATTAATCCTTATTCACTTAAATATTTTCTGTCTACTTAATGTATATCAAAATAGCCCAGTAAAACACCATTATCACTATTTCATTACAAGATGTCACAGCTTCAAAATTACATGCAACAAAAAACTCTTGTTATGATACTTATGAAGCTTCTAAAAAATTTATTTTAATTGTTTAAAATTTATAATGTTACATTAGTACATTGTTACTGAGCAAAGCAGTGCTAGTGACATATATGATACAGAAAGATCGC
>c20259.graph_c0
GTATCAGCATAGTGAACAAAATAAAAGAGAATATACATAACAAATAAGATAACCATGATTTGTTTTAAAAGCAGTAATGGTGTTCAGGTACTTTGTATGTTCTTCAATTTCACAAGGTGTATCCCGCTGGATAACTAATGCACTCGGCCTATTGATGATTTATTACGAGATTCGATCGTAACCACTAATTATAAATTCGATGTTTGCATCTTTGAGACGATTCCGTCCAACATTATCGTTGGACAATTCGTCAGATTTGAATTGAAATCATCTTTTATTCTTGACACATAAGTAGTGTACAGAAAGACCAACTAAATTATATAGAGATGGAAATGTCCAACAACTGGC
>c2026.graph_c0
ATTGTATGAAACGAAAATTTGTTACAAAATAGAGACAGCTATAAGTGTATATATAAATTTTAGGCTGTTAGAGAATGAGATATATTCTTAATATTACTTTTAATGTACTCGAAATATGCATAAAGACTTTTTTGTTTATTTCATGGATATGCAAAAATATAACAGTATATATACATGACTATTTCTTCATATTCTGGTATAAGTGTTGCCAGAAATCTCTTCGCTCGTTAGCAGTGGCTATGAATATATATCAATTAAATTAAGATTTTAAAAATTTTGTGAATGGCAGACAATTCGTATCAGTGTGA
>c20269.graph_c0
GTGCACCGGCACAAGGAATTTCTATGACGACTTTAATTATTATTTATGCGATTACATTACGTTCTTCACTTATCTCGGACTCTGTAGTTCTGTTTTATGTTTATACTCGCAAGTACTTATAACCTAGAATAGCAGATACACTGACGCTAGCAATAACGTTAACTTTATTTACTTTAGTGCTAAAAGGGTTTCGCGCTAATGCTTCGTGCTTTCCAACTCTTTAAACGGCTAAATCTTTTATCGCTACCAAATCGATTGTCGTAAATCCAAACTCTGGGCCCATTGTTACTGTACACAGTACTTATATGGGAGCGACCAAAAATAAATCACGAACAAAACCATATCGGCGCGATCGTAGACTATCTCGGCCGGATCGACCGCGGG
>c20270.graph_c0
AGTGCAGTCATTTTGCCGTGATACAATAAATGGGATAATAATGTAATGTTGGTAATTTTAACCCATTTTGTTTATTTTATTATTTCCAGTGTGCCTTATCACTGCTAATCACAACGTTATCTCCCTCGACGTAGAGGAAACGCTGCAAACACTACAATAGGTACCTACTCCAATGTTTATCCATAATTTTAAATGCCTATATTGATAATCGAGAGATTTGACCAGCGCAATATTGATTCGATATCAGCAATTTCAAACTACAATATACCAAAGTATTCTTCGGAATTTACGTAAACAAACTAATTTTAATTAGTACCGCTATCGGTTAATGGTGAAG
>c20287.graph_c0
GGGAACGGGTCCGGCTCGGGTCAGTTAACGGTCGTAGACCTTCTTGCGGCGGTTCTGAGGAAGTCGTTGGTGATGTCGTGTGCGATGGAGAGAGGGGAAGATGACGTGGTGGCGTCTATGGATATAGGTTGGCCGACGGAGGTTAAGCACGTGAGTCACGTGACTTTTGATCGGTTCAATGGTTTTCTTGGTCTTCCTTCTGAGCTCGAACCGGAGGTTCCTCCTCGAGCTCCTAGCGCCAGTGTAAGTGTATTTGGAGTATCGGCGAAGTCAATGCAATGCTCTTACGACGACAGAGGAAATAGTGTCCCAACAATCCTTCTCAGGATGCAAAAACGTCTATACACTGAAGGAGGTCTTAAAGCAGAAGGAATTTTCCGAATAAATCCAGACAACGGCAAAGAAGAGCATGTCCGTAGACAGTTGAACTGTGGTGTGGTACCACGTGGAATTGATGTTCATTGCTTGGCGGGTTTAATAAAGGCGTGGTTCAGGGAGCTACCTACAGGAGTGCTTGATGTGTTGACACCAGAGCAAGTAATGAGGTGTAACACGGAGGAGGATTGTAGCCGGCTAGTGATACTTCTTCCTCCGGTTGAATCTGCGATTCTTGATTGGGCCATCGGTCTAATGGCGGATGTGGTGGAGCATGAACAGTTTAACAAAATGAATGCTCGCAATGTAGCTATGGTCTTTGCTCCAAATATGACTCAAATGGCAGATCCTTTAACTGCACTCA
>c2029.graph_c0
GCTTCCCTAAAGCTCGTGCTACCCGAGCACTCCATTACTCTGGTAATGCCAGTCTTGAGGCTGCAGTTAATTGGGTGGTGGAGCATGAGAATGATCCTGACGTAGATGAAATGCCAAAGGTGCCTTCCAACTCCAATGTTGGGCCTGCCAAACCTGCTCTTACGCCAGAAGAAGTGAAGCTAAAAGCACAAGAATTAAGGGAACGTGCACGGAAGAAGAAAGAAGAGGAAGAAAAACGGATGGAACGTGAAAGAGAGAAGGAGCGAATTAGGATTGGCAAGGAACTCTTAGAAGCAAAGCGGATGGAAGAAGAAAGAAGAGGAAGAAAAACGGATGGAACGTGAAAGAGAGAAGGAGCGAATTAGGATTGGCAAGGAACTCTTAGAAGCAAAGCGGATGGAAGAAGTAAACGAAAGAAAACGTCTTATGTTTTTGCGTAAAGCTGAGAAAGAAGAAGAAAAACGGGCTAGGGAAAAGATCCGTCAAAAGCTTGAAGAAGACAAGGCTGAAAGAAGGCGAAAACTCGGATTGCCTCCGGAAGATCCTGCAACTGCAGCTGCAAAACCCTCAGTGCCA
>c20296.graph_c0
GGTTATCTGAGATTGATTAATAATTTTTAGACATATTCATTGAATCGGTCTCTGAGACCATAACATCGTGAATCGATTTTTTCTATGTTAATAAAAATGAAAACCCGATACAATAATTTAAAGAATATCGCACTGAAAAAAAAAGATATTGTTGTTTGGATTATCGATTCTCTTGTCCTCGATTTTTCTTGAATCAAATCCACACACCACGATTCAATCGATTTTTACGAAGAATTGCCATCGATTTTTTCGAACTGACTTCCCTATTGACCTTGTAAGGTGTTTACAATTTCACCGAATTATACTATTGACTACTCATAATTAGGGCTGTATATAATAAATATTATATTTGATATAACGAAAAAAAAAAC
>c2030.graph_c0
GGTTTTCTTTTGAGAGGCTTGGCCATCGATTTTGTACAGCACTTGCAGGGCTCGTAGGCATCTTTGGATGGCTTCTGGGGTATCTGCGGTAGATAGTGTTTTCAGGAAGGCATCTCGGATTATCTTCGAGCTGGTGTCCGTGATCAGCTCTGGCAACTGGGTCACCTCTGCCGCTTCGTGGACTCCTCCGTTGTATTGGCAGTCTTTTTTTTGTGTTGGATCTTCTGTGGCCAGTATCGTTAGTGGGGGCCATCAGGTTCCCCGCCGCCGACGCTTCGACTATTGTAGACTATACTCTCGTGTTCCCCTTGGTATCACCCGTTCAGGCAGTGGTCCCCGCTCGGCGATTACGCGCCTTGCGGCGAAACACGGGACATATGCGGGCATTGTTTGACGTGTGTGGCCCCCGGCAGTTCGCGTAGGATGCCGGTTCTTCCTTTGGACGATCGCAGTTGCTTGAGAAGTGCGGCCCTCATAATGTATATTTTGTGAACATTGCGAAATAGAAAATATAGCGTAATTCCATC
>c20316.graph_c0
GGCTATATAAGAATTGAAACACAGGTTATAAAGAAAATGGTTTATATTAAAATGCAGTAGGTATAATATATAGTGGTAATGTTATCGTTCTTCATAAGAGAAATGGTCGAATAAAGGTTAATACGGATACAACATATATTTCTCCATGAAATAACAATGCCACATACATTATTTGGATATTTGTACATTAATCATACTTAAAGTCATAACAGGCTCAAATGAAATTTGGTCAAGAATTTTTTATGTCGTGGAATAGGGTATTGGATAACTTTTAATTTTTTTAATCCTTTACGGAAGCGGACAGGTGTCAATTAATTATTCGCAATCCTAGTTTTTATTTTATTTTATTCATAAAATTCCTTACGATATGTATAATGCAATTTAAATGTAATAAAT
>c20322.graph_c0
GAATTAGAGCGCAAGTCGTAGATTTCGTACCTGTAAACGGAAACGTTTCTTGTCTGCACCATCCTCAAGATTTTGTGGTTACGGTTGATGTCGTATCCAAGAGCATAGCTGTCTCCTATGTTGGATTCTGTTCTGGGTCTGATCCATCTTGTTTGCCCCAAATAAGGGTTCCAAACCACGACCCTCGAGTTGTCCTTAGCCACGCATAACAACAAGCCGTCGCAGTGATACACTCTAGATATCTCGACTTGATTAAGCAAATCTACCTGCTTTATAGATAGATCCATCGTGTCTTCTTCTTCCTCCTTGCTGCGACGGAGATGGAATCTAACTGAACAGACCTTTGAATCCATCGTCATAAACCCCAAAAACTGCGCCGCTGC
>c20334.graph_c0
GCTTGTTTTTCCTATTTCTTCTAATTTGTCGTGGATTACTTGTAATTGCTTATTGATTGTCTCTATTTCCTGTTTTTCTACTATTTCTATTTTGTTTCTTTCCTGTTTCTCTTCTCTTATTAACTTTACTACTTCTTCTACTATTTCTTTGGTGTAATTTTGTGTTTCTTTCTGGTTTATTTCAAGTATTAATTGTTCTAATTTTTCTGAGTATTGTTTCTCTTGTTCTAATAATTTTTCAATAAAATTCTTTTCCCATTCATTATTACTTTCCGTTAAACTTTGAATTATTCCATATAACTCTTCTAAATTCTTAAGAACGCCATCCTTTATGCTACCTTTTA
>c20341.graph_c0
CCCTACTCCCAATCTACTAATCCCAAATTACTATGTTATGGGTTTATCGCGATATCATACTTCACTGAGAGCTCCGTCCATGCCCAAACATTTGCAGCTATCGATGTATCCGAACATGTTATCAATTAAGCAATCATTGTTTCAAATACATAGTAAGGATACAATTTAATACAGGTAACCTAAAATCGATAAATGGGTTATAGGAGTTCAATAACTATTACATCATTTCCATTATACAAACAACAAAAAAGTCGGCAATTAATCCAGGTGAAACACTGAGTTATCTTGAAACAACAAAACCAGTATCACAAGAGCTAAGTCGCGAGTATGCTTTAGTTTCAAAT
>c20343.graph_c0
AAAAAAAGTATCATTATTTCTAATCACACTTCAGATTATGATTGGTTATTCTTGATGGTTGTTCTATACAGAATGGGAAGATTTAAAGATATGTGTATCATGCTTAAACAGGAATTACAAGAGGTTCCAGTCTTTGGACATGCTATGAATGTTTTAGGTTTTATTTTTTTGGTCAGAAATATTGAGTACGATAAAGATATCATACACAAAGGTATTTTGAAATTAAAGAATAAGGATAATTACGATCTTTTAATCTTTCCTGAAGGGACTTATATTACGTCTAAAACTTATGAAAAAACAATCAAATATTTGAAGCAAAATGAAACTTACTTTAATGGTGAACTATACATGCCTAAGAATTCATTGGCACCAAAAACAACAGGCTTTAATTTACTTTTAGACGATTTAAAAGATGATATTGATGGTGTGATTGATGTAACAATGTTGACCACTCCATACGTTCAATATCCGTATGAAGTACATACTTTTAAAAAAATATTTTTGGACGAATCTGGTGGTTTTAACAGTACTTTAATTTTGGATTACATACCTTCTGAGAATGTAAAACAAAACAATTCCTTTCTTTATGAGCGATTTAATAAGAAAGATAAGA
>c20348.graph_c0
AATTTTATCATGTAAGCATTTGGAAAATATAAAGTATATCTAATCTGTATACATAAAATGAAAGAAGTCTATAGTTGCGTGCGTATTATGCACAAACCACTGCGTAGATTTCAATTAATTTTGTTCAATTTCAATTCTTAGATACCTGGCCGTTATTTTAAAGAAAGATTACGCATTTAGAAACGTGTATTTGTCATGGAAAAGTGGAAACCTATGGTGCGTAAGCATAAGACAACGTAGACGAAGTCGCGCGTACCAGCTAGTACTATTTAATCTTAAACGATCAGTTTTGAAATCAGTGTTCCTGTTTCTCTCATAGCTTATATTCTTGTATTTTGTAGTTAAGTTCTATTTGTAACATTACTCATAATATTTAGCAGGCAAACATTGTTAATAATTATAATATGCAGTTTATTGGCGTTCAGTTTCCTTGAGCTTTAACACTGCATACAATCTCTATGTAAATAACAAATTTAGAGTCAAGAAATGCCTTGTCTTTTACATCGCTAAAAATATTTTTAATTTAGCGTTCTGTTTAATATATTTCTGTCACTCTTACTGAAGTGGACATCATGTTGATTCTCATTTGTTTTCCGGCATTTATTCTTGTAATATTAA
>c20349.graph_c0
GTTCTTGTATGTTTTGAAGATGTTTTTGACAATATCTATGGAGATAACACTCGCGCTACATCCCATCGCCGTCAAGTTGAAGACTTTTATGTCTTCTCTCATTTTGTAATGGTTAATGATTCTTGCAGATAGTGAAGGCGTTGAATTGAGCATTGAGACGTTGACTACGAGGATGTCAATCTCCGAAGGTGAAATTTTGTTTCTCTTAAGGACTTTCTCGATGGTGTCTATGTAAAACTCTTCCATCTCCGAGAGCCCATCCTGTAGCGTAGGACGCTGTTCACGGCCCTCAAAGAAGAGCCTTGGTGCGTAAGTTTGCTCTCCGATACCGGAACTAACGATGGCTTTGAGGAGGAACTTGTACTCGTTGAGCCGAAGGTGTTTGTTTCGAAGGATGATATCACCGCTGAATTGAGTGTTCACCATACGATCGTCGGAAGGTTTGTGACATTG
>c20351.graph_c0
GTTTCGGAGCAGCTTCTTCACACGCTCAAGCTCACCGATCGATTCTTCCAATGCTCTTCTAATTCATCTGCAAAACTCTCAGATCACTCATGGGTTTGATTTCAAACCCTACCCGTTTGATTCTCGTCGCCACCATCTTCTTCCTCGTTTCTTCAATCTCCGGTCAGGATTCTGTCGTTGAGAACAATGAGAGACAAGAATCTGAAGGATCTGGTAAAGAGCTTGGTCGTCGTGGAATGGTTGGTACTGAACGAATTGGAGTTGATACTGTTGTAGACAATATTGGTGCTCTTGGTTTGAATCTAGACCTTGATGCTACTGCTCCTAGTGTATTTGATGCTTTGTTTTCGAGTTTCTCGATGATACTTGTCACCGAGATTGGGGATGAAACTTTTATAATAGCGGCATTGATGGCTATGCGACATCCTAAAGCTACTGTTTTATCTGGTGCA
>c20365.graph_c0
GTCATATAATGGTGGTACTATAGTGCTTCCTCTAACTCCCTCGCTAGCTACAAATCGCTACATGCTAATCGCTACGATCACAATTCGGATCAAATAATATTTTCTTTACGAAGATTCGCTATTCCTAGTTGTTTACCGAAACGGTGGTTATTTTGACATTAATCAGCGCCTTCTAGCGCCTAAATCGAATAAAGCAATCGTAATATTAGATATCGATAGCTTAACAATATATTAACTGTCGATGGGGTGCGAGAGAACCTAAAAAAGAGCCTACAAGTTTGAGAACCTGAATTTCTAGTAACCTCATAACCAAACTATACCCGTAAAGCAGTTGTATCGAAA
>c2038.graph_c0
AGTGCCTTGGAACTCCCCGCATTCCTAACACCAGAAAATTCCGCAGCCACACTATCATTTTTTGCAGAAATAGCAAAAGTGGCTGGGCGTAGAAATAAGTAGATAGTAAGGTTTTTCAAAATAGAATACAAGGATAGTACCTTAAAAAAGGGAATTGACGATAGGAATAAATAAGACTAAGTTTGATAAGCTTTAAAACTTTAAAATTTTTAAAAAACACACTACCAATTACACTTGAATGCGGGGAGTAAGACTGAAACCAATCAAAATACACCTGGCATACTACGGACAGATGTACAGATTTAAGTGTTATAATATACCAGTGGAAATGTTATATATGTATAATTTAGGAATAAATGCAAAAATTTTTAAAAATAGTACTAAGAACACTAGTCATTATAATTTAATTATTGAAACAATAAAATGATTGTAAATACAAATTTAAAAAATAGAATACCCAAATGGAACATTAAATGTAATAGTTATAAGTTATAATTAAGAATCAAGGCTACAACAACTCAATAAAAGCCTATGAAAAAATTAT
>c20382.graph_c0
CGTGCGATAAGCATAATTTTTTATACAATTTACGTGCTATAGTCGGAGGACATAGACTGAATACTATCGACAATCGTAATAGTCGTAACATGTAAGTGCTACCGTACATTTATAGTAACGGCGAACTTTGATAACAAATTATTCTTGTTTAATATTTTTTAAACAGGAAGAATATAATAAACGTAAATATCAATTGTTGCAAGTTTCTTGGATAATAACTTAAATTTAACTATGGTCATTGTCAATTCATCGTAATACTATTCAGTCATGTACCTCGTATATTGAATAAAAATAGGCTATGTAGTAAAG
>c2039.graph_c0
AGGTGGTCCATGATTTCCGATTTTACAAGAAAGGAGTTTACACAAGTGGAACTTGTGGCAGCACTCCCATGGATGTGAACCATGCTGTTCTTGCAGTCGGGTATGGAGTTGAAGATGGTGTAGCATACTGGCTCATCAAGAACTCATGGGGAGAAAACTGGGGCGACAATGGCTACTTCAAAATGGAGTTGGGCAAGAATATGTGTGGTGTGGCAACTTGCTCATCATATCCCGTTGTTGCTTAAGCTGGTGGGCTCTTTCGAGGTTGTAGATTTGAATTGTTATTGTTCATATCTGAGGTGAGGAGG
>c20392.graph_c0
TAAAGTCGCCAGTGCACGAATTAATAAGTGCAATAAAATACTCATTCTTTCAGTGTCACGACATAGGGCATTGCGCCTATTAGCGGGCACAAAGTAATCCATAATATTCGTTCGTATCGTTGCTTTTACTCCGACTTAGATTGTCTCGACTGATATATGCATTGGTTGATCGCGAAACAAAAACACAAAGTTAATCACTGCGACTGATTTATTCCCATGTGCATTAATTAAGGTAGCAGACCAATCGGGTATAGTTCCCTATTTTTCTATCTTCCAGCTTACTATACGCCAGGAGTGCACAGACACCCGTCAGAATAACGAAAAACACGAGCATTGATACAGTACTGGGCGAGTTTACACTCGAAACTAATCAAACTAAATTAATAACTTTATTGTACTACTTCCAAACAGTCTGGGCATCCCTGGTATACGCTTTACAGCTTCGCCGAACTTTTTGG
>c204.graph_c0
TGGCAGCAATAATTTACTAGAAGATTGGCTGCCAGAAATAAATAATATTAAGGCCTTTGTGCCATTAAACATGGCGGCAGATTAAGCACTTGGAGCGAATATTATTAGAGTAACGTTTACAAACTTTTCTCCATTTTTGAGGATTAATTTAAACAAAAAAATGATGTGTATTCACTTATCAATTAAGCAGCTAGATAACGCACCACTTGCTAATTCGGCCCTGTTAAAAACATATGCTTTATACGGTATATATGTTGAAGAATTATGTATCAGTTACTGTGGTTCATTTATATACTTTCTTTTATATGCACTTTAATAATCCTCTGTTGATCCGTTAAG
>c2040.graph_c1
GGACAAAATGGCCGCTATGCTCGCCTCTAAGCAGGGCGCCTTCATGGGCCGCAGCTCCTTTGCCCCCGCCCCCAAGGGCGTCGCCAGCCGCGGCTCCCTGCAGGTGGTGGCCGGCCTGAAGGAGGTCCGCGATCGCATCGCCTCGGTGAAGAACACCCAGAAGATCACCGATGCCATGAAGCTGGTGGCTGCCGCTAAGGTCCGCCGTGCTCAGGAGGCTGTGGTGAACGGCCGCCCCTTCTCGGAGAACCTGGTCAAGGTCCTCTACGGCGTGAACCAGCGCGTCCGCCAGGAGGATGTGGACTCGCCCCTGTGCGCTGTCCGCCCCGTCAAGTCGGTGCTGCTGGTTGTGCTGACCGGCGACCGCGGTCTGTGCGGCGGCTACAACAACTTCATCATCAAGAAGACCGAGGCCCGCTACCGCGAGCTTACCGCTATGGGCGTGAAGGTCAACCTGGTGTGCGTGGGCCGCAAGGGTGCTCAGTACTTCGCCCGCCGGAAGCAGTACAACATCGTCAAGTCCTTCTCGCTGGGCGCTGCTCCCTCGACCAAGGAGGCCCAGGGCATTGCTGACGAGATCTTCGCCTCGTTCATTGCTCAGGAGTCGGACAAGGTGGAGCTGGTGTTCACCAAGTTCATCTCGCTGATCAACTCGAACCCCACCATCCAGACGCTGCTGCCCATGACCCCCATGGGCGAGCTGTGCGACGTGGACGGCAAGTGCGTGGACGCCGCTGACGACGAGATCTTCAAGCTGACCACCAAGGGCGGCGAGTTCGCCGTGGAGCGCGAGAAGACCACCATCGAGACCGAGGCCCTGGACCCCTCGCTCATCTTCGAGCAGGAGCCCGCCCAGATCCTGGACGCCCTGCTGCCCCTGTACATGAGCAGCTGCCTGCTGCGCTCGCTGCAGGAGGCGCTGGCCTCCGAGCTGGCTGCCCGCATGAACGCCATGAACAACGCCTCGGACAACGCCAAGGAGCTGAAGAAGGGCCTGACCGTGCAGTACAACAAGCAGCGCCAGGCTAAGATTACCCAGGAGCTGGCGGAGATTGTGGGCGGTGCCGCCGCCACCTCGGGCTAAATGCCTGGGCTCTTGGGCTCGGTGTGTGGGCTTGTGGGAACGGACGAGTCGCGGCGATGACCTGTATGGAGCCTTGTTGCGCGAGGGTGAGGCTTGGCCAGGGAAGAG
>c2041.graph_c0
GTTGTTGGAGAGTAGTTTCAGCCAATTTCAAATGCTTGGATCTGGTTTTGGACCAAACTATAACATGGGTTTTGGTCCTCCACATGAATCCATTTCAAGAACAAGTAGCTGCCATATGGAACCTGTGGATACAATGGAGGTTTTGTTGAAGACCGGTGAAGAAACCAGAGCCGTTGCCTTGAAGAACAAGAGAAAACCAGAGGTTAAGACAAGGGAAGAGCAAAAGACAGAGAAGAAGATCAAAGTAGAGGCTGAGACAGAGTCAAGCATGAAAGGAAAATCAAACATGGGAAACACTGAAGCATCTTCAGACACTTCAAAGGAGACATCGAAAGGAGCTTCAGAGAATCAGAAATTAGATTATATCCACGTGAGAGCTCGTCGAGGCCAAGCCACTGACAGACACAGCTTAGCAGAAAGGGCGAG
>c2041.graph_c1
GCAAGAAAATGAAATATCTGCAAGATATTGTGCCTGGATGCAATAAGGTCACAGGAAAAGCTGGTATGCTTGATGAGATCATCAATTATGTTCAATGTCTCCAAAGACAAGTCGAGTTCCTGTCGATGAAACTTGCTGTCTTGAACCCGGAACTAGAGCTTGCCGTGGAAGATGTATCCGTAAAACAGTTTCAGGCTTACTTTACAAATGTAGTTGCTTCAAAGCAATCAATAATGGTTGATGTGCCATTGTTTCCGTTAGACCAGCAAGGATCTCTAGATTTGTCTGCGATAAACCCGAACCAAACGACATCTATCGAAGCTCCATCTGGAAGCTGGG
>c20414.graph_c0
ATTTTCTCAAATACTAACCCATTTTATCAGGTACGTATATAGATTTGAAAATTCTTAAATGATATCTTGTATTTCTATAAAATAGCGTCCATAAAGCTTAACGGATTAAGACTTTGTTATCAAGGTTCAACGGTAAAATAAACAAAAATTATAGAAATAAAAACGTAGGTACTCCGTTCAAACAATGTAAAAGAAAAACTTTCTAAAATATGTTGTGGATAAAAGAAAACGACGCAAATTGAGGTAATTAAAACCCTCGTCAGCAGATGTTGTGAGGTAGATAAATTTATTTGAGGCACGTAGCCGAGCTCCGTTTTGCAAGCCG
>c20427.graph_c0
AGCCAAACCAAGAGGGTTTAAAGAATGTGTTTACGAAGAGTGGGGGGATGGTGTTTGGAAGGGATGAGTATGGAGATGAAGTTGGGTGGAGAGTTGGGAGAGAGATGGAAGGAAGTGTGTTGAAGTGGAGAGTTGGGAGAGAGATGGAAGGAAGTGTGTTGAAGTGGAGACTGGGTGGCAAAATTTGGCTAACTTATTGGCCAAACAAGTTGAACACTTTGTTTTATGAGACTAGATGTGTAGAGTGGTGTGATGAGGTTGATTTGCCGTTGCTTCCTACTTCTTAGAGTCGCAAATAAGAAAAAAT
>c2044.graph_c0
AGCTGGTAGTTCAACGAGGCTCCAGGTCGAGATGAGTCAATGAAACCGCGAATGTCGTTGACCGTGTGATGGTGATTGAACTTAGCCACCAGACGTGTCCCATCCGCTAGTCTAAGCTGTATCGATGTGGTTGGAACGGTTTCATCTATTACAAGACTTTGAGATGGTGCTGGTTCGGTTTGGATGGGAATGGGAGCGGAGTCTGGAGCCACAGGTGAGCTACTTCCGCTACCTTCATTGCTACCACCTAGAGTTCTTCCAACACCCTGAAATGAAACCCTACGTTTCTGTCTTTCAGGGCATTTCTCTTCCTTTCGCATCAAGTTGACATGAACCGGAGCTCTTCTATCGGCAGGCTCAAGCTCTTTCGGGCACTCAGACTTTCGAATGCTCTCGAGAAACGATGCATTCTCAGGATCATCCAATTTCCTCAAAGGACCATCATCAATA
>c20444.graph_c0
[truncated: 46,172,045 more chars]
