# Supplementary material for: Antheraea pernyi Suppressor of Cytokine Signaling 2 Negatively Modulates the JAK/STAT Pathway to Attenuate Microbial Infection
Source: Int J Mol Sci. 2022 Sep 8;23(18):10389. doi: 10.3390/ijms231810389 (PMC9499667; doi:10.3390/ijms231810389)
Supplement: Supplementary file 1 [file ijms-23-10389-s001.zip › File S2.xlsx]

## Sheet: no_ref_trans_all_table
#ID	C1_count	C1_FPKM	C2_count	C2_FPKM	C3_count	C3_FPKM	E1_count	E1_FPKM	E2_count	E2_FPKM	E3_count	E3_FPKM
c49003.graph_c0	21	5	17	4.37	31	5.88	6	1.33	4	0.83	0	0
c46523.graph_c0	5	0.63	15	1.49	13	1.38	4	0.89	3	0.48	8	1.56
c47514.graph_c1	1	0.37	0	0	1	0.29	0	0	0	0	2	0.72
c67633.graph_c0	4	0.27	3	0.22	3	0.16	2	0.13	1	0.06	3	0.22
c61029.graph_c0	595	13.64	1006	26.11	1061	19.55	722	16.85	862	18.39	658	17.68
c57355.graph_c0	345	11.24	226	7.79	334	8.34	325	7.61	331	8.05	271	7.61
c45535.graph_c0	0	0	7	1.47	3	0.46	0	0	0	0	0	0
c24348.graph_c0	0	0	0	0	0	0	0	0	2	0.69	0	0
c35103.graph_c0	6	1.9	1	0.34	6	1.5	2	0.58	1	0.27	5	1.58
c52450.graph_c0	194	6.14	1541	55.17	169	4.34	5	0.14	0	0	0	0
c77374.graph_c0	0	0	0	0	0	0	0	0	3	0.82	0	0
c51378.graph_c0	239	19.42	102	9.27	212	13.87	388	30.22	342	24.66	224	19.7
c49224.graph_c1	1	0.28	0	0	1	0.22	0	0	0	0	0	0
c46463.graph_c1	0	0	3	0.64	1	0.16	0	0	2	0.34	0	0
c54717.graph_c3	24	5.32	10	2.4	11	1.94	30	6.22	15	2.92	31	7.06
c55559.graph_c0	0	0	3	0.17	14	0.56	17	0.81	9	0.4	11	0.6
c58398.graph_c1	184	19.2	197	22.85	272	22.8	230	22.85	245	22.64	226	25.28
c60008.graph_c0	0	0	0	0	0	0	0	0	0	0	2	0.68
c58107.graph_c1	3067	101.4	2291	84.86	3965	105.68	4937	161.15	5194	155.39	4149	154.05
c51431.graph_c1	4	0.27	10	0.76	6	0.33	1	0.06	7	0.42	0	0
c82510.graph_c0	0	0	1	0.35	0	0	0	0	0	0	2	0.65
c75562.graph_c0	4	0.6	0	0	1	0.12	0	0	0	0	0	0
c81403.graph_c0	1	0.49	2	1.03	0	0	0	0	0	0	0	0
c50865.graph_c0	33	4.98	22	3.4	53	5.58	10	1.27	10	1.36	11	1.91
c45378.graph_c1	1	0.25	5	1.35	1	0.2	6	1.4	1	0.22	0	0
c49898.graph_c0	5	0.88	2	0.38	10	1.4	28	4.6	34	5.33	20	3.64
c34645.graph_c1	11	3.16	7	2.15	13	2.96	0	0	0	0	0	0
c57687.graph_c1	0	0	2	1.06	4	1.59	0	0	0	0	0	0
c55812.graph_c0	1103	23.75	1282	31.33	1309	22.77	931	19.37	1007	19.32	802	19.17
c7763.graph_c0	0	0	0	0	0	0	0	0	1	0.22	0	0
c34878.graph_c0	3	0.29	1	0.11	8	0.62	0	0	0	0	0	0
c60732.graph_c3	339	17.79	393	18.76	384	14.31	316	13.93	306	11.03	234	10.13
c66080.graph_c0	0	0	0	0	0	0	1	0.38	0	0	0	0
c58251.graph_c0	835	13.13	2105	28.95	1823	21.42	318	3.78	1099	12.85	338	6.38
c59899.graph_c1	1074	26.08	688	22.16	1176	26.98	232	5.41	164	5.9	239	6.37
c38894.graph_c1	0	0	0	0	0	0	0	0	0	0	0	0
c35656.graph_c0	0	0	8	2.56	1	0.24	0	0	0	0	0	0
c54172.graph_c0	294	6.01	354	8.22	575	9.46	52	1.11	136	2.45	60	1.37
c55758.graph_c0	424	11.92	260	8.3	341	7.77	434	11.72	359	8.97	306	9.51
c58064.graph_c4	215	4.12	578	11.53	444	6.76	130	2.11	232	3.97	93	1.72
c23426.graph_c0	0	0	0	0	0	0	7	0.42	10	0.55	2	0.14
c72009.graph_c0	3	0.55	0	0	2	0.29	0	0	0	0	2	0.38
c54974.graph_c1	18	0.98	30	1.83	37	1.62	13	0.68	33	1.59	17	1.05
c36863.graph_c0	4	0.51	2	0.28	2	0.21	3	0.36	2	0.23	0	0
c57901.graph_c1	11	2.55	17	4.25	16	2.95	12	2.59	11	2.23	6	1.42
c47828.graph_c1	3	0.31	10	1.14	10	0.83	8	0.78	5	0.46	2	0.22
c60071.graph_c0	65	7.2	46	4.9	69	6.25	40	6.05	48	6.8	32	5.19
c58269.graph_c0	135	4.07	148	5.58	141	3.52	67	2.02	127	3.99	71	2.46
c60979.graph_c0	44	9.84	40	9.67	45	8.01	8	1.67	6	1.18	8	1.83
c63235.graph_c0	4	0.44	0	0	0	0	5	0.52	0	0	8	0.94
c48782.graph_c0	8	0.33	16	0.74	17	0.56	4	0.16	3	0.11	11	0.5
c30504.graph_c0	0	0	0	0	4	0.88	0	0	0	0	0	0
c46380.graph_c0	5	1.14	3	0.74	7	1.28	0	0	0	0	3	0.7
c60884.graph_c2	0	0	3	1.01	0	0	0	0	0	0	3	0.95
c55813.graph_c1	500	17.04	536	21.74	598	18.21	450	15.45	599	18.52	376	14.75
c66273.graph_c0	0	0	0	0	4	0.56	1	0.16	1	0.15	5	0.91
c48845.graph_c0	13	0.74	3	0.19	38	1.73	5	0.27	2	0.1	1	0.06
c59967.graph_c0	435	7.36	634	12.19	720	9.85	285	4.66	491	7.4	214	4.04
c21914.graph_c0	0	0	3	1.33	0	0	2	0.77	2	0.73	0	0
c48887.graph_c0	9	0.66	1	0.08	12	0.7	6	0.42	13	0.84	5	0.4
c33103.graph_c0	0	0	0	0	0	0	2	0.41	0	0	3	0.67
c29009.graph_c0	6	2.07	2	0.73	1	0.27	3	0.95	0	0	1	0.34
c53516.graph_c0	491	15.47	758	29.72	794	21.26	230	7.67	477	13.89	231	8.95
c67778.graph_c0	0	0	0	0	0	0	0	0	6	1.58	0	0
c57643.graph_c1	34	1	27	0.91	67	1.59	8	0.23	20	0.52	6	0.19
c49.graph_c0	0	0	0	0	3	0.75	0	0	0	0	1	0.32
c4020.graph_c0	0	0	0	0	0	0	0	0	8	1.18	0	0
c61226.graph_c0	0	0	1	0.22	6	0.98	0	0	1	0.18	0	0
c43123.graph_c0	6	0.99	4	0.73	6	0.8	1	0.16	13	1.9	1	0.17
c47645.graph_c0	179	8.86	168	9.35	194	7.81	139	6.63	188	8.28	135	7.36
c57673.graph_c0	813	25.03	1457	50.76	1266	31.47	514	15.28	858	23.52	447	15.22
c33000.graph_c0	0	0	0	0	0	0	0	0	0	0	7	3.35
c43106.graph_c0	0	0	4	1.42	2	0.53	0	0	0	0	0	0
c56359.graph_c1	206	6.33	443	12.32	381	9.52	214	9.94	301	11.48	134	7.15
c58158.graph_c0	642	18.27	1197	40.65	1116	25.97	471	12.72	796	19.79	402	13.21
c51836.graph_c0	24	2.3	37	3.94	44	3.38	33	3.01	27	2.29	35	3.6
c68354.graph_c0	0	0	4	1.27	0	0	0	0	0	0	0	0
c4473.graph_c0	0	0	0	0	0	0	0	0	1	0.43	2	0.97
c71634.graph_c0	0	0	2	0.83	0	0	0	0	0	0	2	0.77
c68618.graph_c0	0	0	0	0	0	0	0	0	9	1.49	0	0
c75193.graph_c0	0	0	7	1.06	0	0	0	0	0	0	0	0
c60951.graph_c0	405	12.99	472	22.21	506	15.23	667	16.68	696	19.34	476	13.44
c66519.graph_c0	0	0	0	0	0	0	0	0	16	1.78	0	0
c39315.graph_c1	0	0	1	0.28	0	0	0	0	2	0.45	0	0
c46877.graph_c0	2	0.3	0	0	1	0.21	0	0	7	0.92	0	0
c45496.graph_c0	11	0.56	18	1.03	13	0.54	4	0.2	4	0.18	6	0.34
c59433.graph_c0	224	3.69	359	6.77	333	4.46	135	2.16	242	3.57	118	2.18
c48969.graph_c0	0	0	5	0.78	1	0.11	2	0.27	5	0.62	2	0.3
c42412.graph_c0	379	38.56	487	55.14	445	36.39	252	24.49	320	28.9	182	19.97
c60120.graph_c0	18	2.38	46	5.87	33	3.96	9	1.04	31	2.09	8	0.74
c57774.graph_c0	67	4.58	58	4.39	95	5.17	77	5.03	47	2.86	42	3.08
c35599.graph_c0	0	0	1	0.22	0	0	0	0	2	0.36	4	0.85
c49944.graph_c1	0	0	0	0	0	0	3	0.14	517	22.48	1	0.05
c66908.graph_c0	2	0.79	2	0.83	1	0.31	0	0	0	0	1	0.39
c31365.graph_c0	7	1.13	0	0	5	0.65	0	0	0	0	0	0
c61443.graph_c0	8815	135.16	8996	169.66	14233	182.93	5525	81.58	7381	104.49	5337	90.76
c33309.graph_c0	2	0.8	0	0	1	0.31	2	0.73	3	1.03	3	1.17
c55728.graph_c1	2713	145.65	814	61.23	2991	109.43	4177	174.65	3789	138.65	3797	186.04
c52565.graph_c1	26	0.79	31	2.04	61	1.4	4	0.1	17	1.14	3	0.12
c50635.graph_c0	163	16.55	132	15.45	150	11.99	205	17.53	143	12.45	137	12.75
c66823.graph_c0	2	0.66	1	0.35	3	0.79	0	0	0	0	0	0
c68643.graph_c0	0	0	0	0	3	0.88	0	0	0	0	0	0
c42118.graph_c0	0	0	0	0	0	0	0	0	1	0.4	2	0.91
c53048.graph_c0	493	20.09	1001	46.37	705	23.18	469	18.53	719	26.14	404	18.11
c62473.graph_c0	0	0	0	0	0	0	7	1.04	4	0.56	8	1.33
c364.graph_c0	0	0	0	0	0	0	3	0.74	0	0	0	0
c42961.graph_c0	2	0.7	0	0	0	0	2	0.65	0	0	0	0
c49377.graph_c0	4	1.58	3	1.25	7	2.18	4	1.45	7	2.39	3	1.17
c4007.graph_c0	0	0	0	0	0	0	0	0	12	1.09	0	0
c44566.graph_c0	3	0.5	5	0.75	0	0	0	0	1	0.12	6	0.86
c67032.graph_c0	0	0	0	0	4	1.39	0	0	0	0	0	0
c47475.graph_c0	3	0.34	0	0	9	0.82	0	0	0	0	0	0
c67494.graph_c0	2	0.44	6	1.44	1	0.18	0	0	0	0	0	0
c52685.graph_c0	336	81.54	232	60.62	375	72.3	648	134.68	473	91.31	452	102.97
c53607.graph_c0	384	23.18	673	48.35	486	25.89	350	23.72	436	28.7	233	17.5
c40986.graph_c0	5	0.59	11	1.06	15	1.15	2	0.22	5	0.38	3	0.34
c60350.graph_c0	138	8.2	91	6.43	123	6.6	150	6.81	138	5.38	103	4.94
c41088.graph_c0	0	0	0	0	0	0	0	0	0	0	0	0
c49529.graph_c0	1	0.16	3	0.54	6	0.79	0	0	4	0.58	0	0
c50185.graph_c0	212	20.84	173	18.81	208	16.37	200	18.6	182	15.89	174	18.54
c47082.graph_c0	1	0.2	4	0.88	0	0	7	1.33	2	0.36	2	0.42
c41737.graph_c0	1	0.47	2	0.99	0	0	2	0.86	3	1.21	2	0.92
c61595.graph_c0	19	1.91	25	2.79	35	2.82	6	0.57	25	2.22	5	0.54
c66895.graph_c0	3	1.33	0	0	0	0	0	0	0	0	0	0
c29521.graph_c0	5	0.58	8	1.03	7	0.65	8	0.88	2	0.2	0	0
c38476.graph_c0	1	0.1	1	0.12	3	0.25	0	0	0	0	0	0
c51312.graph_c1	2	0.07	5	0.16	16	0.36	0	0	136	2.93	2	0.07
c44739.graph_c0	0	0	2	0.63	4	0.94	3	0.82	0	0	0	0
c50075.graph_c0	13	1.02	4	0.29	18	1.47	3	0.27	1	0.06	4	0.38
c34334.graph_c0	0	0	2	0.61	0	0	0	0	0	0	0	0
c39168.graph_c1	3	0.57	2	0.41	7	1.06	0	0	1	0.17	0	0
c58893.graph_c1	65	3.87	140	7.71	93	3.48	111	4.53	160	6.03	85	3.96
c34352.graph_c0	2	1.03	0	0	0	0	0	0	0	0	0	0
c59494.graph_c2	5	0.54	0	0	4	0.34	0	0	9	0.85	6	0.69
c83264.graph_c0	0	0	0	0	0	0	0	0	4	0.97	0	0
c52957.graph_c1	10	2.38	14	3.8	7	1.32	23	5.09	17	3.53	6	1.45
c79911.graph_c0	0	0	2	0.85	1	0.32	0	0	0	0	0	0
c80622.graph_c0	0	0	0	0	0	0	0	0	3	1.01	0	0
c60031.graph_c1	11	3.71	30	10.37	32	8.62	10	2.96	18	5.18	9	2.97
c48830.graph_c0	74	11.6	47	8.09	120	15.18	173	25.6	128	17.72	96	15.9
c46794.graph_c2	3	0.44	1	0.16	0	0	0	0	0	0	2	0.31
c34245.graph_c1	0	0	0	0	0	0	0	0	4	0.91	0	0
c41027.graph_c0	0	0	2	0.66	0	0	0	0	0	0	1	0.31
c56502.graph_c0	68	2	29	1.04	166	3.94	167	5.61	218	6.04	263	9.54
c58618.graph_c0	848	35.3	872	37.75	1029	33.35	1102	33.29	1089	29.86	949	35.13
c2231.graph_c0	0	0	1	0.21	3	0.46	0	0	3	0.51	0	0
c50423.graph_c0	14	0.61	14	0.69	19	0.68	21	0.91	24	0.95	15	0.75
c60389.graph_c0	640	7.15	1106	14.79	1209	11.18	334	3.19	590	6.31	289	4.74
c47649.graph_c0	0	0	0	0	0	0	2	0.3	6	0.84	7	1.16
c31378.graph_c0	1	0.03	4	0.14	35	0.86	1	0.03	4	0.11	0	0
c64497.graph_c0	0	0	0	0	0	0	0	0	6	1.95	0	0
c56422.graph_c0	2850	142.65	3265	181.53	3532	140.03	1972	96.03	2329	102.5	1806	99.28
c52636.graph_c1	318	22.76	409	32.71	329	18.91	206	14.08	263	16.66	216	16.75
c71180.graph_c0	0	0	0	0	0	0	0	0	6	1.12	0	0
c51157.graph_c0	6	0.94	3	0.52	4	0.5	1	0.15	1	0.14	0	0
c8411.graph_c0	3	0.3	2	0.22	4	0.32	0	0	0	0	2	0.21
c51879.graph_c0	66	3.7	47	2.97	39	1.76	41	2.21	41	2.04	33	2.02
c56442.graph_c1	156	6.17	133	5.94	144	4.63	172	6.55	151	5.31	110	4.79
c49078.graph_c0	22	0.87	7	0.31	20	0.64	4	0.15	5	0.17	9	0.39
c58690.graph_c1	1704	133.61	1136	99.63	1822	114.96	1813	135.98	1661	115.56	1513	128.52
c65473.graph_c0	3	0.37	2	0.27	3	0.29	4	0.46	2	0.22	0	0
c43635.graph_c0	0	0	0	0	0	0	0	0	0	0	1	0.37
c45879.graph_c2	0	0	6	0.84	0	0	0	0	5	0.56	0	0
c47918.graph_c0	3	0.23	2	0.17	4	0.25	7	0.52	6	0.41	10	0.83
c38301.graph_c0	10	1.99	2	0.43	4	0.64	0	0	0	0	0	0
c50016.graph_c0	0	0	2	0.8	2	0.6	0	0	0	0	0	0
c59936.graph_c2	333	14.89	265	12.93	409	15.11	315	12.1	263	12.48	260	12.54
c47482.graph_c0	2	0.29	5	0.8	6	0.7	0	0	3	0.39	0	0
c9419.graph_c0	0	0	0	0	2	0.52	0	0	1	0.29	0	0
c62240.graph_c0	0	0	0	0	0	0	0	0	18	3.24	0	0
c79625.graph_c0	0	0	0	0	0	0	1	0.26	3	0.75	0	0
c59562.graph_c0	455	7.13	750	13.34	856	10.82	486	7.28	1267	17.5	505	8.68
c50649.graph_c0	17	1.4	17	2.92	11	0.7	11	1.19	35	2.44	9	0.96
c46065.graph_c0	51	2.75	98	5.94	130	5.65	27	1.4	69	3.3	46	2.71
c43032.graph_c0	18	3.48	23	4.91	14	2.21	9	1.62	16	2.75	13	2.65
c57554.graph_c1	36	5.45	30	4.99	46	5.58	34	4.86	37	4.95	40	6.37
c50371.graph_c0	511	53.78	316	36.98	529	44.6	344	32.88	348	33	357	39.98
c79445.graph_c0	0	0	0	0	0	0	0	0	3	1.3	0	0
c52427.graph_c0	78	3.36	104	5.3	125	5.3	51	2.73	80	3.04	59	2.83
c43901.graph_c0	2	0.32	2	0.35	2	0.25	0	0	2	0.28	1	0.17
c66349.graph_c0	2	0.54	0	0	5	1.08	0	0	0	0	0	0
c72422.graph_c0	0	0	0	0	0	0	0	0	0	0	0	0
c49152.graph_c0	0	0	0	0	2	0.27	3	0.48	4	0.61	1	0.18
c57309.graph_c0	174	6.57	118	5.04	171	5.21	181	6.58	144	4.84	139	5.78
c53754.graph_c0	147	5.64	234	10.18	258	8.1	64	2.36	75	2.55	69	2.9
c60302.graph_c0	146	4.27	172	6.01	253	6.6	11	0.31	20	0.64	18	2.29
c62601.graph_c0	1	0.11	9	1.06	5	0.42	8	0.8	2	0.19	1	0.11
c59337.graph_c0	289	7.56	506	15.62	481	10.28	179	4.38	224	5.14	117	2.96
c50525.graph_c0	163	12.9	233	20.63	205	13.06	126	9.54	166	11.66	158	13.54
c56299.graph_c0	11	0.69	17	1.2	32	1.63	7	0.42	22	1.23	27	1.85
c54213.graph_c2	0	0	0	0	0	0	0	0	0	0	1	0.29
c34086.graph_c0	3	0.31	5	0.58	8	0.67	0	0	0	0	1	0.11
c63484.graph_c0	0	0	5	1.36	0	0	0	0	5	1.11	0	0
c44503.graph_c0	3	0.61	2	0.44	6	0.97	0	0	4	0.71	0	0
c51177.graph_c0	195	63.96	158	55.01	173	44.83	103	31.16	121	34.47	133	43.45
c82911.graph_c0	2	0.49	0	0	2	0.39	0	0	0	0	0	0
c32737.graph_c0	2	0.36	2	0.39	1	0.14	0	0	0	0	1	0.19
c2926.graph_c0	0	0	0	0	0	0	0	0	2	0.78	0	0
c2973.graph_c0	0	0	0	0	0	0	0	0	3	0.84	0	0
c50245.graph_c0	6	0.66	3	0.37	11	0.98	2	0.21	2	0.2	3	0.36
c66821.graph_c0	0	0	0	0	1	0.3	0	0	1	0.33	0	0
c56019.graph_c0	4403	71.28	4279	78.7	5036	66.01	4714	73.69	4946	71.18	3939	71.16
c18409.graph_c0	0	0	0	0	0	0	0	0	2	0.58	0	0
c46857.graph_c0	14	0.98	9	0.59	19	0.89	4	0.25	11	0.62	5	0.43
c43724.graph_c0	2	0.54	1	0.29	0	0	0	0	0	0	0	0
c37451.graph_c1	0	0	0	0	0	0	0	0	3	0.65	0	0
c59769.graph_c1	1002	8.02	1558	13.56	1674	10.45	785	6	1212	8.41	658	5.5
c36269.graph_c0	3	0.32	0	0	0	0	1	0.1	13	1.22	2	0.23
c78082.graph_c0	0	0	0	0	0	0	0	0	2	0.83	0	0
c55574.graph_c2	11	0.91	19	1.81	21	1.39	6	0.52	8	0.58	0	0
c35833.graph_c0	0	0	0	0	2	0.68	0	0	1	0.37	0	0
c32652.graph_c0	4	0.35	3	0.3	15	1.07	0	0	1	0.08	0	0
c49615.graph_c0	129	3.61	109	3.5	166	3.82	8	0.22	31	0.79	3	0.1
c51187.graph_c0	1	0.07	4	0.3	4	0.21	12	0.76	7	0.41	15	1.08
c50507.graph_c2	0	0	1	0.38	0	0	0	0	0	0	0	0
c63952.graph_c0	4	1.18	2	0.63	4	0.93	0	0	0	0	0	0
c41012.graph_c1	0	0	0	0	0	0	0	0	7	0.97	0	0
c37124.graph_c0	12	1.06	13	1	9	0.5	6	0.39	3	0.18	2	0.22
c33098.graph_c0	0	0	0	0	0	0	0	0	15	3.11	0	0
c32356.graph_c0	0	0	0	0	0	0	0	0	11	1.31	0	0
c53858.graph_c0	22	0.69	42	1.68	95	2.4	23	1.17	31	0.86	9	0.31
c58990.graph_c1	92	7.5	85	7.75	97	6.36	61	4.75	42	3.04	58	5.12
c62180.graph_c0	0	0	0	0	0	0	0	0	28	4.24	0	0
c44278.graph_c1	0	0	0	0	0	0	0	0	0	0	0	0
c33343.graph_c0	0	0	0	0	0	0	0	0	119	9.39	1	0.09
c8870.graph_c0	2	0.61	3	0.97	0	0	2	0.56	0	0	0	0
c34340.graph_c1	2	0.28	1	0.15	1	0.11	1	0.13	1	0.12	0	0
c40341.graph_c2	3	1.34	0	0	0	0	0	0	0	0	0	0
c63634.graph_c0	6	1.15	1	0.21	0	0	2	0.36	0	0	0	0
c53761.graph_c0	313	6.39	258	5.98	453	7.48	335	6.61	516	9.4	317	7.18
c48336.graph_c0	7	1.06	23	3.83	9	1.09	1	0.14	5	0.67	4	0.64
c73972.graph_c0	0	0	1	0.45	1	0.33	0	0	0	0	0	0
c48427.graph_c0	58	1.93	73	3.21	44	1.18	29	0.93	38	1.97	11	0.4
c60355.graph_c0	330	15.93	587	31.86	602	23.28	168	7.76	370	15.95	148	7.85
c7740.graph_c0	0	0	3	1.03	2	0.51	0	0	0	0	1	0.32
c64001.graph_c0	5	1.27	0	0	1	0.2	0	0	0	0	0	0
c37255.graph_c0	7	0.64	6	0.61	9	0.66	3	0.26	4	0.33	1	0.1
c20334.graph_c0	0	0	1	0.4	0	0	0	0	1	0.33	0	0
c48914.graph_c0	12	1.36	9	1.13	9	0.82	0	0	3	0.3	0	0
c57882.graph_c0	20	0.85	68	3.24	36	1.23	127	5.16	122	4.58	59	2.74
c48585.graph_c0	4	1.01	3	0.81	3	0.6	3	0.7	2	0.44	2	0.51
c82541.graph_c0	0	0	0	0	2	0.44	0	0	0	0	0	0
c58849.graph_c0	309	6.8	662	16.16	549	9.31	144	3.43	303	5.82	146	3.43
c48006.graph_c0	0	0	0	0	0	0	4	0.14	120	3.33	0	0
c61589.graph_c0	639	82.81	666	95.33	783	81.43	495	60.78	496	56.82	406	55.96
c41230.graph_c0	0	0	3	0.5	0	0	1	0.14	3	0.41	0	0
c54402.graph_c0	4	0.55	2	0.38	7	1.02	5	0.52	8	0.76	5	0.98
c15620.graph_c0	0	0	0	0	0	0	4	1.39	0	0	0	0
c64216.graph_c0	0	0	0	0	0	0	0	0	21	1.9	0	0
c54709.graph_c0	16	0.94	9	0.59	21	0.99	9	0.51	15	0.78	7	0.45
c50430.graph_c0	3	0.36	0	0	11	1.06	11	0.84	25	2.45	25	2.93
c48366.graph_c0	0	0	0	0	1	0.28	0	0	3	0.93	0	0
c57140.graph_c0	88075	9188.6	54462	6356.35	139684	11891.9	130207	12775.9	127620	11803.7	130409	14455.4
c59049.graph_c0	190	6.6	153	6.06	179	5.02	58	1.93	61	1.76	63	2.24
c62582.graph_c0	2	0.24	1	0.13	0	0	7	0.79	3	0.32	9	1.14
c37490.graph_c1	3	0.53	0	0	2	0.28	1	0.17	1	0.16	0	0
c52407.graph_c0	30	1.83	34	2.13	41	2.89	31	2.26	30	1.22	13	0.91
c59045.graph_c0	634	14.45	1167	30.18	1057	19.47	444	9.75	762	15.48	358	9.02
c43231.graph_c0	0	0	0	0	0	0	0	0	5	0.83	0	0
c48440.graph_c0	1	0.12	4	0.54	1	0.1	0	0	9	0.97	0	0
c39404.graph_c0	0	0	0	0	0	0	0	0	1	0.35	0	0
c19849.graph_c0	0	0	2	0.68	0	0	0	0	0	0	2	0.64
c56295.graph_c1	1359	97.34	805	66.59	1698	98.38	4453	303.46	4637	293.93	2987	230.81
c60625.graph_c0	1392	19.76	1144	18.72	1657	18.31	5431	68.9	4705	54.65	3777	54.98
c30040.graph_c0	2	0.37	3	0.61	7	1.04	0	0	4	0.66	1	0.19
c33289.graph_c0	0	0	0	0	0	0	3	1.37	4	1.71	1	0.49
c29463.graph_c0	0	0	0	0	0	0	0	0	34	2.5	0	0
c59335.graph_c0	361	17.46	553	26.84	584	19.54	318	13.75	425	15.92	278	13.91
c65837.graph_c0	4	0.39	4	0.43	1	0.08	0	0	1	0.09	1	0.1
c42092.graph_c1	0	0	9	3.19	2	0.53	0	0	2	0.59	0	0
c48228.graph_c0	13	0.52	10	0.45	17	0.55	3	0.12	7	0.25	5	0.22
c50504.graph_c0	1	0.14	3	0.45	1	0.11	5	0.64	4	0.48	9	1.29
c72253.graph_c0	1	0.48	0	0	3	1.13	0	0	0	0	0	0
c57317.graph_c2	125	4.51	156	6.7	224	7.6	138	5.45	110	3.52	77	3.98
c32419.graph_c0	0	0	0	0	0	0	0	0	22	2.51	0	0
c59122.graph_c2	0	0	0	0	0	0	2	0.86	3	1.21	0	0
c59496.graph_c0	9	0.69	8	0.69	18	1.11	5	0.37	3	0.2	2	0.17
c31082.graph_c0	0	0	0	0	0	0	0	0	5	1.42	0	0
c66586.graph_c0	2	0.28	7	1.06	2	0.22	0	0	0	0	0	0
c32683.graph_c0	3	0.48	1	0.17	5	0.63	0	0	3	0.42	1	0.17
c55189.graph_c0	166	4.42	141	4.26	207	4.46	302	7.78	240	5.7	173	5.1
c44867.graph_c0	0	0	0	0	0	0	0	0	20	2.11	0	0
c53586.graph_c0	286	15.15	390	23.26	445	19.01	109	5.55	88	4.14	101	5.91
c30979.graph_c0	0	0	4	1.02	1	0.19	0	0	4	0.83	0	0
c49890.graph_c0	3	0.26	5	0.48	5	0.34	1	0.08	1	0.08	1	0.09
c58042.graph_c1	55	3.63	54	4.31	62	2.72	12	0.63	29	1.4	13	0.77
c49668.graph_c0	0	0	4	1.21	1	0.22	2	0.52	2	0.49	4	1.14
c46449.graph_c1	0	0	0	0	2	0.61	0	0	0	0	0	0
c69869.graph_c0	0	0	0	0	0	0	0	0	5	1.66	0	0
c56271.graph_c1	4	1.42	0	0	4	1.12	0	0	0	0	0	0
c43751.graph_c0	7	0.7	1	0.11	3	0.24	0	0	1	0.09	5	0.54
c34223.graph_c0	59	3.16	56	3.38	91	3.93	20	1.03	18	0.86	34	1.99
c43992.graph_c0	3	0.31	3	0.34	8	0.87	1	0.15	5	0.45	3	0.33
c53134.graph_c0	375	25.67	469	36.02	541	29.83	18	1.18	35	2.13	14	1.04
c35198.graph_c1	1	0.48	0	0	0	0	0	0	0	0	0	0
c62327.graph_c0	6	1.47	3	0.79	8	1.56	2	0.46	2	0.43	2	0.5
c55550.graph_c0	643	10.47	591	11.75	758	10.06	281	4.57	367	6.19	311	5.47
c14752.graph_c0	0	0	0	0	0	0	2	0.83	0	0	0	0
c59076.graph_c2	536	17.35	684	25.06	629	16.44	414	12.92	459	13.22	307	10.97
c59212.graph_c0	234	5.12	126	3.29	285	6.11	1432	32.4	918	19.24	1169	30.3
c29176.graph_c0	2	0.68	6	1.48	1	0.18	0	0	1	0.2	3	0.7
c21116.graph_c0	0	0	1	0.35	2	0.52	0	0	0	0	0	0
c60427.graph_c1	19	6.2	6	2.08	16	4.12	2	0.6	0	0	0	0
c50587.graph_c0	2	0.33	4	0.66	1	0.11	3	0.34	8	0.73	2	0.29
c34923.graph_c0	0	0	0	0	0	0	0	0	1	0.41	0	0
c51201.graph_c1	0	0	0	0	0	0	0	0	0	0	0	0
c57472.graph_c0	116	7.61	213	16.69	140	8.6	65	4.34	113	7.28	49	4.25
c51535.graph_c0	7	0.93	6	0.88	5	0.53	2	0.25	9	1.06	0	0
c59977.graph_c1	27	5.09	39	8.02	32	4.82	22	3.9	19	3.15	26	5.09
c60635.graph_c1	45594	982.49	17206	420.74	23373	406.92	98833	2057.04	85038	1631.67	64596	1543.68
c18740.graph_c0	0	0	2	0.65	1	0.24	0	0	0	0	0	0
c1820.graph_c0	1	0.24	0	0	1	0.19	0	0	0	0	0	0
c60212.graph_c0	383	10	322	9.28	532	12.06	114	3.72	120	3.43	118	4.24
c37714.graph_c1	2	0.17	7	0.67	3	0.21	0	0	2	0.15	0	0
c35632.graph_c0	2	0.25	0	0	5	0.51	0	0	5	0.56	0	0
c47704.graph_c0	10	0.39	66	2.93	28	0.88	7	0.26	3	0.1	0	0
c56760.graph_c2	730	35.3	598	32.39	750	29.05	498	22.54	440	18.57	440	23.01
c55981.graph_c1	150	10.58	73	6.21	96	5.63	121	9.21	112	8.43	87	7.05
c54138.graph_c0	2433	121.58	2952	166.22	3104	125.09	2147	103.12	2338	103.85	1720	94.21
c59725.graph_c2	81	1.48	123	2.69	182	2.73	50	0.91	86	1.54	39	0.85
c22712.graph_c0	0	0	0	0	0	0	0	0	0	0	0	0
c60210.graph_c1	0	0	2	0.66	3	0.73	0	0	1	0.27	2	0.62
c46982.graph_c0	7	1.69	4	1.04	4	0.77	1	0.22	4	0.85	2	0.49
c48200.graph_c0	133	5.41	174	8	192	6.3	121	4.77	112	4.05	54	2.42
c49057.graph_c0	2	0.18	6	0.59	3	0.21	0	0	4	0.31	0	0
c63478.graph_c0	1	0.33	0	0	7	1.84	0	0	0	0	0	0
c60223.graph_c0	1078	12.14	1667	21.33	1475	13.42	804	8.75	920	9.23	585	7.33
c34052.graph_c0	981	414.87	385	170.54	1068	354.17	783	302.83	497	180.68	713	294.95
c34525.graph_c0	23	3.06	27	3.97	37	3.95	0	0	0	0	0	0
c52745.graph_c0	496	14.55	607	20.21	720	17.29	221	6.19	267	7	162	5.54
c3839.graph_c0	0	0	0	0	4	0.69	0	0	0	0	0	0
c44226.graph_c0	0	0	0	0	1	0.09	10	1.07	2	0.2	2	0.24
c62369.graph_c0	0	0	0	0	0	0	0	0	22	4.35	0	0
c37059.graph_c0	0	0	0	0	1	0.4	0	0	1	0.43	2	0.99
c77222.graph_c0	2	0.79	2	0.83	0	0	0	0	0	0	0	0
c9300.graph_c0	0	0	0	0	0	0	0	0	6	1.42	0	0
c56684.graph_c0	120	7.79	121	8.99	144	6.94	70	4.11	84	4.52	78	6.02
c47640.graph_c0	8	1.18	1	0.16	20	2.36	2	0.28	0	0	0	0
c42287.graph_c0	4	0.99	0	0	2	0.39	0	0	0	0	0	0
c60322.graph_c1	479	23.73	370	20.66	421	16.82	396	18.86	371	16.34	256	13.9
c30088.graph_c0	9	0.99	1	0.12	9	0.8	3	0.31	3	0.29	2	0.24
c63656.graph_c0	2	0.48	4	1.04	0	0	0	0	1	0.21	0	0
c32993.graph_c0	0	0	1	0.12	8	0.68	5	0.5	3	0.28	0	0
c72798.graph_c0	0	0	0	0	0	0	0	0	2	0.74	0	0
c63307.graph_c0	2	0.3	1	0.17	5	0.61	1	0.14	0	0	1	0.16
c50970.graph_c0	735	56	1350	115.24	996	61.12	528	38.49	701	47.4	464	38.4
c63302.graph_c0	0	0	0	0	0	0	0	0	15	1.76	0	0
c61720.graph_c0	12	2.98	9	2.41	9	1.78	0	0	11	2.39	0	0
c14393.graph_c0	0	0	0	0	0	0	0	0	0	0	0	0
c67624.graph_c0	3	0.71	2	0.51	2	0.38	0	0	0	0	0	0
c58093.graph_c0	1	0.15	11	1.85	8	0.98	0	0	0	0	0	0
c62016.graph_c0	1	0.18	1	0.2	6	0.88	2	0.34	1	0.16	1	0.19
c58167.graph_c2	5	0.63	2	0.28	3	0.3	0	0	0	0	0	0
c58867.graph_c0	2	0.39	1	0.21	3	0.47	0	0	3	0.52	0	0
c30253.graph_c0	0	0	0	0	0	0	0	0	0	0	0	0
c54517.graph_c0	3	0.61	3	0.66	6	0.97	4	0.76	6	1.07	2	0.42
c51780.graph_c0	25	6.43	21	5.8	20	4.08	16	3.82	29	6.52	33	8.61
c71491.graph_c0	0	0	0	0	0	0	0	0	4	1.32	0	0
c54066.graph_c0	97	15.08	166	33.01	101	12.06	28	4.94	46	6.31	15	2.66
c61277.graph_c0	5441	43.99	11155	102.68	10304	67.37	3481	27.25	6787	48.91	2828	25.5
c53630.graph_c0	298	11.88	303	13.65	360	11.55	187	7.19	220	7.81	153	6.72
c55197.graph_c1	62	6.94	29	4.97	121	11.35	41	4.8	77	8.06	68	9.04
c59556.graph_c0	1189	16.7	1242	19.21	1539	16.2	648	7.77	955	10.46	511	7.25
c7856.graph_c0	3	1.52	1	0.53	2	0.79	1	0.46	0	0	0	0
c59046.graph_c0	29	2.03	15	1.27	39	2.22	10	0.62	10	0.52	18	1.51
c58285.graph_c0	218	7.75	221	10.36	293	9.25	214	6.35	226	6.3	216	7.28
c57946.graph_c0	174	7.96	280	14.43	244	9.04	213	9.37	277	11.3	149	7.5
c79554.graph_c0	0	0	0	0	1	0.33	0	0	0	0	0	0
c45649.graph_c0	25	1.57	140	8.21	88	3.45	0	0	0	0	0	0
c57962.graph_c0	132	6.27	313	16.91	217	9.01	117	5.93	223	9.49	91	6.09
c47409.graph_c0	10	0.59	6	0.4	21	0.99	9	0.51	10	0.52	15	0.96
c49091.graph_c0	1439	127.81	1599	158.5	1552	110.89	731	61.98	1023	80.58	652	62.48
c38554.graph_c0	0	0	3	0.56	3	0.41	0	0	3	0.45	0	0
c59296.graph_c1	0	0	0	0	0	0	0	0	1	0.26	2	0.6
c59794.graph_c0	25897	1167.61	10465	542.21	26932	994.05	32750	1431.96	30072	1245.88	28125	1422.27
c48579.graph_c0	0	0	0	0	0	0	2	0.36	0	0	3	0.59
c44478.graph_c0	6	0.63	1	0.12	3	0.25	3	0.3	2	0.19	1	0.11
c58252.graph_c0	5	0.77	6	1.02	6	0.76	4	0.63	9	1.27	16	2.66
c54727.graph_c0	1602	43.8	2167	66.87	2029	45.86	1398	39.03	1620	39.78	1046	31.79
c37713.graph_c0	5	1.28	0	0	0	0	0	0	1	0.23	2	0.53
c76855.graph_c0	0	0	0	0	0	0	0	0	4	1.32	0	0
c39157.graph_c0	0	0	3	0.48	3	0.35	0	0	8	1.02	3	0.46
c5879.graph_c0	0	0	0	0	2	0.79	0	0	0	0	0	0
c54855.graph_c0	4	0.17	5	0.24	22	0.77	2	0.08	15	0.58	6	0.29
c60286.graph_c2	5	0.99	1	0.15	3	0.8	0	0	2	0.24	3	0.43
c51685.graph_c1	0	0	0	0	2	0.34	0	0	1	0.19	1	0.22
c37455.graph_c0	0	0	2	0.91	8	2.72	0	0	0	0	0	0
c50237.graph_c0	3	0.46	2	0.34	7	0.87	2	0.29	0	0	0	0
c57838.graph_c0	113	1.39	152	3.86	140	1.25	38	0.4	82	0.84	24	0.33
c55002.graph_c1	22	0.24	46	0.47	43	0.31	40	0.36	164	1.37	52	0.55
c32593.graph_c0	4	0.69	0	0	1	0.14	0	0	2	0.3	6	1.08
c36393.graph_c1	0	0	0	0	0	0	0	0	0	0	0	0
c79004.graph_c0	0	0	0	0	2	0.5	0	0	3	0.82	0	0
c63202.graph_c0	0	0	0	0	0	0	0	0	35	1.94	0	0
c8676.graph_c0	0	0	0	0	0	0	0	0	6	1.26	0	0
c2312.graph_c0	4	0.43	3	0.36	0	0	0	0	4	0.38	0	0
c60420.graph_c0	895	15.3	930	18.08	1474	20.46	1249	21.42	1246	18.96	1039	20.46
c76655.graph_c0	0	0	0	0	2	0.62	0	0	0	0	0	0
c69101.graph_c0	0	0	0	0	0	0	0	0	6	0.86	0	0
c57557.graph_c1	7	0.28	8	0.39	25	1.68	80	3.92	74	2.93	56	3.85
c50707.graph_c0	249	8.93	517	22.48	506	15.42	263	10.12	513	19.98	321	14.3
c41914.graph_c0	0	0	3	0.98	1	0.26	0	0	5	1.34	0	0
c69424.graph_c0	3	1.48	0	0	0	0	0	0	0	0	0	0
c61506.graph_c1	0	0	0	0	2	0.62	0	0	0	0	0	0
c53062.graph_c0	393	22.53	493	31.82	472	21.67	274	14.88	302	15.18	209	12.93
c75175.graph_c0	0	0	1	0.52	0	0	0	0	0	0	0	0
c63111.graph_c0	0	0	0	0	0	0	3	0.51	9	1.44	0	0
c65290.graph_c0	1	0.43	4	1.82	1	0.34	0	0	0	0	0	0
c73802.graph_c0	0	0	0	0	1	0.34	0	0	0	0	0	0
c48034.graph_c1	0	0	0	0	0	0	0	0	19	1.67	0	0
c60384.graph_c0	297	7.54	304	8.61	390	7.76	193	4.49	268	5.88	171	4.47
c55963.graph_c0	2279	103.64	4141	212.37	3437	126.07	1205	52.69	2545	102.89	937	46.81
c48896.graph_c0	11	0.7	3	0.22	21	1.08	4	0.25	6	0.34	0	0
c41616.graph_c0	20	3.59	26	5.4	33	3.78	9	1.69	30	5.87	14	2.56
c45435.graph_c0	6	0.65	1	0.12	12	1.04	3	0.31	3	0.29	0	0
c37821.graph_c0	4	0.27	17	1.28	11	0.59	2	0.13	7	0.42	0	0
c45773.graph_c1	4495	34.98	4171	35.89	5915	35.58	3834	27.77	4645	31.01	3335	27.84
c60433.graph_c1	0	0	3	0.62	2	0.3	0	0	1	0.17	0	0
c62770.graph_c0	0	0	2	0.35	6	0.77	0	0	2	0.28	1	0.17
c49011.graph_c0	246	23.88	261	28.22	266	20.76	214	19.81	246	21.17	165	17.23
c64018.graph_c0	0	0	2	0.57	4	0.84	0	0	0	0	0	0
c38780.graph_c1	1	0.49	0	0	0	0	0	0	0	0	0	0
c38626.graph_c0	0	0	0	0	0	0	0	0	0	0	0	0
c2876.graph_c1	0	0	0	0	0	0	0	0	0	0	0	0
c35698.graph_c0	7	0.92	4	0.58	4	0.42	4	0.5	3	0.35	6	0.84
c65210.graph_c0	0	0	1	0.23	3	0.5	2	0.39	0	0	0	0
c53370.graph_c0	102	4.68	90	4.65	141	5.23	145	6.42	112	4.57	88	4.44
c60459.graph_c2	2	0.46	7	1.76	1	0.19	1	0.22	1	0.2	2	0.48
c45510.graph_c0	0	0	0	0	0	0	6	0.73	7	0.79	5	0.68
c70090.graph_c0	1	0.12	2	0.27	5	0.49	0	0	1	0.11	0	0
c41292.graph_c0	2	0.56	7	2.1	7	1.56	1	0.26	1	0.24	1	0.28
c64764.graph_c0	0	0	0	0	0	0	0	0	8	1.98	0	0
c66976.graph_c0	0	0	1	0.21	1	0.15	0	0	4	0.68	5	1
c53395.graph_c0	8	0.35	16	0.78	21	0.73	23	0.96	40	1.55	18	0.87
c40159.graph_c0	12	0.73	4	0.29	3	0.31	0	0	0	0	1	0.07
c19610.graph_c0	0	0	0	0	0	0	0	0	7	0.94	0	0
c73146.graph_c0	0	0	4	1.04	1	0.19	0	0	0	0	0	0
c38085.graph_c0	2	0.99	0	0	0	0	0	0	3	1.27	1	0.48
c55099.graph_c0	10	0.76	0	0	9	0.56	22	1.64	6	0.41	6	0.5
c50563.graph_c0	1	0.32	1	0.34	0	0	0	0	0	0	0	0
c48964.graph_c0	2	0.29	2	0.27	12	1.54	1	0.16	5	0.74	2	0.35
c33971.graph_c0	2	0.54	0	0	0	0	0	0	2	0.47	0	0
c80630.graph_c0	0	0	0	0	0	0	1	0.24	0	0	2	0.53
c56403.graph_c0	277	6.73	260	7.19	301	5.91	103	2.42	173	3.74	46	1.24
c58217.graph_c0	20003	995.84	14716	824.05	28695	1159.66	10321	476.74	11365	488.33	9855	523.52
c70075.graph_c0	0	0	0	0	1	0.4	0	0	0	0	0	0
c45141.graph_c1	0	0	0	0	0	0	2	0.05	144	3.63	0	0
c81948.graph_c0	0	0	2	0.94	0	0	0	0	1	0.39	0	0
c49015.graph_c0	3	0.32	0	0	3	0.4	3	0.31	5	0.62	3	0.35
c60668.graph_c0	107	4.17	161	9.19	225	7.72	103	4.04	505	15.56	102	3.56
c60275.graph_c1	132	3.01	247	6.82	251	5.14	72	1.67	126	2.36	81	2.22
c31725.graph_c0	0	0	0	0	0	0	0	0	9	1.5	0	0
c29857.graph_c0	66	5.26	39	3.48	91	5.84	81	6.17	49	3.46	54	4.66
c32263.graph_c0	0	0	0	0	0	0	0	0	0	0	0	0
c20156.graph_c0	1	0.36	0	0	3	0.86	0	0	0	0	0	0
c60453.graph_c0	79	0.96	197	2.71	216	2.11	60	0.7	169	1.81	59	0.79
c42685.graph_c0	1	0.32	2	0.68	7	1.77	0	0	0	0	0	0
c29748.graph_c0	7	1.8	18	4.97	6	1.23	4	0.96	1	0.22	3	0.78
c2683.graph_c0	0	0	0	0	3	0.49	1	0.19	0	0	0	0
c31554.graph_c0	1	0.17	1	0.19	3	0.41	3	0.49	4	0.61	0	0
c61131.graph_c0	1129	21.1	1057	22.43	1078	16.3	2947	53.19	3058	50.87	1796	37.26
c48376.graph_c0	1	0.35	2	0.75	8	2.24	0	0	2	0.61	4	1.41
c85291.graph_c0	0	0	0	0	2	0.63	0	0	0	0	0	0
c60727.graph_c3	1027	13.45	673	9.63	1829	19.54	639	8.55	846	9.78	670	9.69
c34735.graph_c0	1	0.17	4	0.75	2	0.27	2	0.32	3	0.45	1	0.18
c47976.graph_c0	0	0	0	0	0	0	1	0.03	176	4.66	3	0.1
c40982.graph_c0	0	0	0	0	0	0	0	0	0	0	3	0.89
c56747.graph_c0	220	7.46	298	11.4	373	10.21	59	1.94	125	3.79	92	3.46
c59787.graph_c0	42	4.42	58	6.77	63	5.31	21	2.19	45	4.18	14	1.57
c53845.graph_c0	692	22.19	747	27.09	1761	45.56	402	12.44	754	21.48	302	10.72
c53393.graph_c0	18	2.36	19	2.75	29	3.05	25	3.22	17	1.97	18	2.5
c33382.graph_c0	50	7	106	16.35	109	12.23	68	9.01	96	11.87	49	7.25
c59185.graph_c0	10	0.93	12	1.25	95	7.12	89	12.92	121	17.78	83	13.94
c67482.graph_c0	0	0	0	0	0	0	0	0	5	2	0	0
c9576.graph_c0	3	0.79	0	0	1	0.21	0	0	1	0.23	0	0
c56522.graph_c0	115	5.05	239	9.69	212	6.59	93	3.7	168	5.72	73	2.52
c63598.graph_c0	0	0	0	0	0	0	0	0	8	2.24	0	0
c35149.graph_c0	0	0	0	0	0	0	2	0.12	153	8.22	1	0.07
c78572.graph_c0	0	0	0	0	0	0	0	0	5	1.08	0	0
c69860.graph_c0	0	0	1	0.53	0	0	0	0	0	0	0	0
c38200.graph_c0	0	0	0	0	0	0	0	0	2	0.64	0	0
c68539.graph_c0	0	0	0	0	0	0	0	0	9	1.94	0	0
c61553.graph_c0	0	0	0	0	0	0	1	0.13	94	11.71	0	0
c58278.graph_c2	389	6.78	305	6.03	387	5.45	197	3.32	225	3.49	217	4.2
c50637.graph_c1	2	0.28	3	0.47	5	0.57	2	0.27	2	0.25	2	0.3
c46260.graph_c1	19	0.75	15	0.67	29	0.93	30	1.14	14	0.85	20	0.87
c46949.graph_c0	0	0	0	0	0	0	0	0	53	1.82	1	0.1
c58048.graph_c1	7	0.45	15	1.15	12	0.62	10	0.62	7	0.4	5	0.35
c59729.graph_c1	9	1.38	21	3.49	3	0.36	0	0	0	0	0	0
c59602.graph_c2	905	12.72	644	11.46	1254	13.91	1740	23.89	1794	25.66	1266	20.19
c36226.graph_c0	0	0	0	0	0	0	0	0	0	0	2	0.86
c35224.graph_c0	0	0	0	0	0	0	0	0	0	0	0	0
c55706.graph_c0	348	17.68	332	20.49	427	18.83	335	18.61	347	17.16	288	17.79
c59307.graph_c0	1925	27.86	1190	20.8	2250	27.05	2696	39.26	2752	35.71	2024	32.69
c59857.graph_c0	1299	29.37	584	14.81	1398	25.93	948	21.99	891	20.41	818	21.11
c60679.graph_c1	261	10.54	259	11.79	318	10.33	294	11.41	226	8.09	259	11.49
c60733.graph_c1	2	0.27	2	0.3	12	1.3	0	0	3	0.58	2	0.29
c67939.graph_c0	3	0.62	3	0.68	1	0.17	0	0	0	0	0	0
c32028.graph_c0	0	0	0	0	0	0	6	0.67	4	0.42	2	0.25
c38542.graph_c0	2	0.81	0	0	0	0	0	0	0	0	0	0
c55900.graph_c2	51	8.14	59	14.1	119	19.1	38	6.51	44	6.68	57	10.22
c14832.graph_c0	0	0	0	0	0	0	0	0	4	1.04	0	0
c47378.graph_c0	6	0.65	11	1.32	13	1.12	3	0.31	0	0	2	0.23
c42922.graph_c0	0	0	0	0	0	0	0	0	0	0	2	0.56
c46191.graph_c0	1	0.14	2	0.3	7	0.77	0	0	2	0.24	0	0
c60034.graph_c0	47	2.9	103	12.11	143	15.62	27	1.48	31	0.94	31	3.38
c29940.graph_c0	124	9.28	113	9.47	145	8.73	18	1.29	9	0.6	19	1.54
c79701.graph_c0	0	0	0	0	0	0	0	0	2	0.78	0	0
c54418.graph_c0	31	0.83	25	1.06	62	1.94	5	0.34	26	1.8	18	1.36
c52360.graph_c0	5	0.53	8	1.39	11	0.76	10	1.66	9	1.18	4	0.48
c46288.graph_c0	1	0.16	0	0	1	0.13	2	0.31	2	0.29	0	0
c47118.graph_c0	0	0	0	0	0	0	0	0	2	0.46	1	0.26
c60167.graph_c0	530	14.84	1282	36.25	1032	22.46	328	9.19	721	20.57	295	9.85
c50944.graph_c0	13	0.57	12	0.59	16	0.57	2	0.08	21	0.82	4	0.19
c48614.graph_c0	8	0.92	6	0.75	1	0.09	2	0.22	0	0	5	0.71
c53919.graph_c0	2112	143.9	1360	103.85	2097	115.45	2073	135.06	2044	123.4	1732	128.17
c61209.graph_c0	180	3.19	263	6.2	251	4.03	28	0.54	61	1.21	25	0.58
c64444.graph_c0	0	0	0	0	6	1.61	0	0	1	0.29	0	0
c74089.graph_c0	5	1.36	0	0	0	0	0	0	0	0	0	0
c48247.graph_c2	1	0.2	1	0.19	0	0	4	0.67	8	1.27	6	1.13
c80334.graph_c0	0	0	0	0	0	0	0	0	3	0.7	0	0
c62283.graph_c0	0	0	0	0	0	0	0	0	24	2.55	0	0
c30033.graph_c0	0	0	0	0	0	0	0	0	50	2.99	0	0
c73505.graph_c0	0	0	0	0	0	0	2	0.91	0	0	0	0
c29128.graph_c0	0	0	0	0	0	0	17	1	19	1.03	11	0.73
c47206.graph_c0	2	0.62	2	0.66	0	0	0	0	0	0	0	0
c57201.graph_c2	828	47.67	852	55.29	918	41.21	512	21.79	473	16.98	469	20.75
c56377.graph_c0	11	0.31	108	2.54	37	0.64	22	0.48	40	0.85	2	0.1
c70767.graph_c0	0	0	0	0	0	0	0	0	5	1.1	0	0
c35216.graph_c0	0	0	0	0	0	0	0	0	12	2.03	0	0
c52016.graph_c0	41	2.87	210	17.76	100	5.85	16	1.16	68	4.12	0	0
c71849.graph_c0	0	0	0	0	0	0	0	0	3	0.65	0	0
c40392.graph_c0	0	0	0	0	2	0.47	0	0	0	0	4	1.2
c46635.graph_c0	751	29.39	1038	42.18	1160	34.68	505	18.47	879	29.01	450	19.49
c69413.graph_c0	0	0	0	0	0	0	0	0	5	1.97	0	0
c63379.graph_c0	0	0	0	0	5	1.31	0	0	0	0	0	0
c63356.graph_c0	4	1.13	0	0	6	1.34	0	0	0	0	0	0
c71546.graph_c0	0	0	0	0	3	1.05	0	0	0	0	0	0
c58177.graph_c0	152	6.1	265	11.15	244	7.23	118	4.71	155	5.4	88	3.6
c70683.graph_c0	1	0.26	1	0.28	0	0	0	0	3	0.67	1	0.26
c55957.graph_c0	126	13.39	48	5.67	107	9.14	85	8.6	80	7.53	62	7.06
c47019.graph_c0	0	0	0	0	0	0	0	0	45	3.04	0	0
c31739.graph_c0	0	0	0	0	0	0	0	0	8	2.72	0	0
c58229.graph_c2	239	11.87	323	16.84	307	12.45	118	6.48	134	6.97	53	3.79
c39671.graph_c0	2	0.78	0	0	1	0.31	0	0	0	0	0	0
c51934.graph_c0	1	0.13	5	0.52	8	0.6	3	0.34	1	0.08	0	0
c52747.graph_c0	60	2.99	58	3.25	71	2.89	16	0.77	14	0.62	24	1.31
c50417.graph_c0	23	0.59	32	0.93	30	0.62	16	0.39	18	0.51	21	0.59
c61748.graph_c0	1	0.31	3	1	2	0.49	0	0	1	0.27	0	0
c52989.graph_c0	38	4.38	16	1.94	49	4.56	0	0	0	0	1	0.14
c37918.graph_c0	3	0.46	2	0.33	11	1.34	1	0.14	2	0.27	2	0.32
c49793.graph_c0	8	0.96	13	1.73	10	0.97	1	0.11	5	0.53	1	0.13
c78983.graph_c0	0	0	0	0	1	0.31	0	0	0	0	2	0.77
c29790.graph_c0	836	32.4	923	40.44	1130	35.35	972	36.28	1139	39.27	900	38.41
c49714.graph_c0	91	4.92	170	10.62	109	4.84	53	2.88	85	4.22	66	4.2
c63714.graph_c0	0	0	0	0	0	0	8	1.17	3	0.41	4	0.65
c54432.graph_c0	101	6.46	59	3.43	183	7.47	64	3.38	115	4.66	113	6.1
c21968.graph_c0	0	0	2	0.6	2	0.44	0	0	0	0	0	0
c37546.graph_c0	6	0.65	3	0.36	5	0.43	5	0.51	2	0.19	1	0.12
c58871.graph_c0	292	16.56	320	20.63	342	17.71	242	11.81	259	13.01	225	12.12
c56182.graph_c0	64	4.07	71	5.08	87	4.46	63	3.89	94	5.4	49	3.45
c29239.graph_c0	2	0.76	1	0.4	0	0	6	2.09	3	0.98	1	0.37
c54518.graph_c1	3	0.21	8	0.62	7	0.39	0	0	0	0	0	0
c7818.graph_c0	2	0.24	1	0.13	4	0.38	0	0	3	0.31	0	0
c46184.graph_c0	15	1.89	14	1.95	7	0.71	5	0.6	15	1.67	1	0.13
c70337.graph_c0	0	0	0	0	5	1.47	0	0	0	0	0	0
c74180.graph_c0	0	0	0	0	0	0	0	0	4	1.26	0	0
c47253.graph_c0	2	0.87	0	0	5	1.59	0	0	0	0	0	0
c58140.graph_c2	908	32.76	862	36.54	1197	34.79	890	25.91	965	27.44	806	28.62
c8257.graph_c0	1	0.45	1	0.47	2	0.7	0	0	0	0	0	0
c41768.graph_c0	0	0	0	0	0	0	0	0	2	0.83	0	0
c59326.graph_c0	149	3.44	282	8.76	226	4.3	110	2.91	138	2.87	111	3.64
c32319.graph_c0	2	0.25	2	0.28	8	0.81	4	0.48	0	0	3	0.4
c71477.graph_c0	0	0	1	0.44	0	0	0	0	0	0	0	0
c61098.graph_c2	28	6.19	40	9.57	35	6.16	14	2.89	27	5.24	27	6.12
c57997.graph_c0	251	5.49	223	5.81	406	8.29	101	2.81	228	6.26	140	4.29
c39423.graph_c2	0	0	0	0	0	0	0	0	7	1.37	0	0
c46108.graph_c0	1	0.37	0	0	0	0	2	0.69	2	0.65	0	0
c44832.graph_c1	0	0	0	0	0	0	0	0	24	2.05	0	0
c58905.graph_c0	468	19.86	524	27.21	604	21.76	241	11.65	272	12.8	168	8.34
c9537.graph_c0	0	0	0	0	2	0.78	0	0	0	0	1	0.49
c3793.graph_c1	0	0	0	0	0	0	0	0	3	1.16	0	0
c55409.graph_c2	21	3.39	12	2.13	22	2.85	11	1.68	3	0.43	2	0.34
c47185.graph_c0	5	0.66	3	0.44	3	0.32	0	0	5	0.58	0	0
c56891.graph_c1	1891	103.4	1219	78.06	1821	79.6	1723	93.08	1483	77.9	1359	86.44
c9751.graph_c0	0	0	3	1.54	0	0	0	0	0	0	0	0
c37099.graph_c0	0	0	0	0	0	0	0	0	2	0.68	4	1.56
c56427.graph_c0	409	23.57	418	26.4	551	24.13	353	22.44	287	15.5	237	16.08
c69557.graph_c0	2	0.72	0	0	0	0	1	0.33	1	0.31	0	0
c32810.graph_c0	7	0.85	0	0	6	0.59	0	0	2	0.22	3	0.39
c50731.graph_c0	3434	106.49	2922	102.57	4238	106.11	2962	88.58	3516	97.05	2651	90.81
c45868.graph_c1	1	0.03	0	0	0	0	20	0.63	16	0.47	17	0.62
c42221.graph_c0	11	0.45	41	1.9	23	0.76	2	0.08	13	0.47	0	0
c47056.graph_c1	11	0.67	4	0.23	10	0.51	8	0.94	16	1.91	4	0.59
c60246.graph_c0	1	0.12	5	0.58	17	1.54	2	0.21	8	0.81	1	0.11
c82145.graph_c0	0	0	3	0.96	0	0	0	0	0	0	0	0
c36627.graph_c0	2	0.91	1	0.47	5	1.77	2	0.83	0	0	0	0
c66542.graph_c0	1	0.2	5	1.1	2	0.32	0	0	0	0	0	0
c65032.graph_c0	0	0	2	0.57	0	0	0	0	0	0	0	0
c65988.graph_c0	0	0	0	0	0	0	3	0.39	6	0.72	3	0.43
c54894.graph_c0	64	2.67	136	6.41	135	4.55	49	1.97	85	3.16	42	1.93
c29771.graph_c0	34	5.43	37	6.49	44	5.63	32	4.82	24	3.38	20	3.35
c2591.graph_c0	2	0.54	0	0	0	0	0	0	2	0.47	0	0
c58591.graph_c0	356	26.86	202	17	441	27.39	227	16.36	151	10.62	193	15.76
c59254.graph_c2	105	15.06	40	6.32	83	9.59	246	33.37	174	22.05	216	32.81
c33301.graph_c0	0	0	2	0.56	5	1.04	0	0	0	0	0	0
c49821.graph_c0	22	3.48	17	2.95	23	2.91	37	5.52	17	2.37	18	2.99
c46723.graph_c0	0	0	0	0	0	0	0	0	0	0	3	1.37
c64825.graph_c0	2	0.39	0	0	2	0.31	0	0	0	0	0	0
c57692.graph_c0	1410	27.72	1244	27.78	1773	28.17	1598	30.38	1714	30.02	1382	30.17
c61115.graph_c0	571	12.14	473	11.22	581	9.51	542	11.01	547	9.76	450	9.98
c39754.graph_c0	0	0	1	0.4	1	0.3	0	0	0	0	0	0
c52756.graph_c0	4	0.37	5	0.51	6	0.44	7	0.62	9	0.73	4	0.4
c29448.graph_c0	0	0	2	0.73	5	1.37	0	0	3	0.9	0	0
c42967.graph_c0	60	7.75	46	6.57	42	4.35	31	3.8	31	3.66	16	2.2
c59563.graph_c0	458	5.82	537	7.79	756	8.35	147	1.81	224	2.74	118	1.9
c45782.graph_c0	342	12.43	314	13.43	239	7.01	1	0.03	1	0.03	0	0
c1641.graph_c1	2	0.98	0	0	0	0	0	0	0	0	0	0
c49264.graph_c0	2	0.31	1	0.21	5	0.61	0	0	2	0.27	1	0.16
c35118.graph_c0	0	0	3	0.76	1	0.19	0	0	2	0.76	0	0
c44989.graph_c2	0	0	1	0.29	1	0.21	0	0	0	0	0	0
c64374.graph_c0	0	0	4	1.27	1	0.24	2	0.55	0	0	0	0
c29308.graph_c0	0	0	0	0	0	0	0	0	29	2.71	0	0
c70875.graph_c0	0	0	0	0	1	0.26	2	0.6	1	0.28	0	0
c43419.graph_c0	0	0	0	0	0	0	0	0	0	0	2	0.75
c56664.graph_c0	9	0.99	5	0.61	19	1.67	23	2.4	19	1.85	17	2
c58641.graph_c0	72	3.2	128	6.41	110	3.92	59	2.53	77	3.05	46	2.23
c80182.graph_c0	2	0.86	0	0	0	0	0	0	0	0	0	0
c47169.graph_c1	0	0	1	0.48	0	0	0	0	0	0	0	0
c77462.graph_c0	0	0	2	0.99	2	0.74	0	0	0	0	0	0
c63758.graph_c0	0	0	0	0	0	0	0	0	5	1.42	1	0.33
c2310.graph_c0	1	0.15	0	0	5	0.62	0	0	0	0	0	0
c78454.graph_c0	2	0.81	0	0	0	0	1	0.37	0	0	0	0
c70768.graph_c0	0	0	2	0.26	8	0.74	0	0	0	0	0	0
c60437.graph_c1	21	0.92	10	0.52	30	1.06	1	0.06	6	0.23	3	0.14
c47504.graph_c0	43	4.11	25	2.66	40	3.07	11	1	13	1.1	5	0.51
c46438.graph_c0	10	1.11	1	0.12	1	0.09	1	0.11	0	0	2	0.24
c30245.graph_c0	0	0	0	0	0	0	0	0	22	3.31	0	0
c42881.graph_c0	740	67.61	1082	110.36	995	73.12	403	35.13	645	52.25	385	37.92
c56666.graph_c0	9	0.43	25	2.81	12	0.46	16	0.74	17	0.72	15	0.8
c56596.graph_c0	43	1.38	65	2.31	93	2.41	59	1.88	69	2.02	57	2.07
c42825.graph_c0	0	0	2	0.46	5	0.85	0	0	0	0	0	0
c49338.graph_c0	11	0.93	5	0.46	10	0.68	2	0.16	5	0.37	2	0.18
c55226.graph_c0	127	4.47	88	3.51	146	4.17	144	4.89	174	5.45	119	4.62
c59666.graph_c0	3075	46.34	2857	50.63	3926	47.89	5252	76.36	6165	83.17	4265	71.54
c18741.graph_c0	4	1.35	0	0	0	0	0	0	0	0	0	0
c67287.graph_c0	2	0.43	1	0.23	1	0.17	2	0.4	1	0.19	1	0.22
c57018.graph_c1	113	7.44	185	13.99	216	12.03	98	4.71	89	3.71	70	4.08
c61686.graph_c0	14	2.1	6	0.99	11	1.32	13	1.84	10	1.32	8	1.26
c43398.graph_c1	0	0	0	0	0	0	0	0	0	0	0	0
c56537.graph_c0	0	0	1	0.51	1	0.39	0	0	0	0	0	0
c82650.graph_c0	0	0	0	0	0	0	0	0	3	0.99	0	0
c71500.graph_c0	0	0	0	0	0	0	0	0	4	1.6	0	0
c48767.graph_c0	6	1.14	6	1.24	8	1.21	1	0.19	3	0.53	1	0.2
c37613.graph_c1	0	0	0	0	0	0	0	0	4	1.15	0	0
c43702.graph_c0	3	0.41	2	0.3	7	0.77	6	0.78	2	0.24	1	0.14
c74438.graph_c0	1	0.51	0	0	0	0	0	0	0	0	0	0
c58741.graph_c1	351	6.1	297	5.83	421	5.91	284	5.7	319	6	240	5.52
c34829.graph_c0	3	0.56	2	0.41	6	0.9	0	0	2	0.33	0	0
c57431.graph_c0	183	3.98	273	6.29	278	4.57	112	2.66	361	8.54	2	0.05
c32250.graph_c0	3	0.62	3	0.68	2	0.33	6	1.17	2	0.37	0	0
c31440.graph_c0	2	0.35	0	0	7	0.97	3	0.49	0	0	0	0
c31244.graph_c0	0	0	0	0	2	0.29	7	1.18	2	0.32	1	0.19
c8213.graph_c0	2	0.94	0	0	0	0	0	0	0	0	0	0
c60169.graph_c0	2	0.96	0	0	0	0	0	0	0	0	0	0
c58458.graph_c0	67	2.16	116	4.74	155	4.78	32	0.73	42	1.25	15	0.39
c57987.graph_c0	39	7.73	17	3.67	44	6.97	9	1.67	17	2.97	26	5.33
c56616.graph_c0	24	0.5	168	4	59	0.97	39	0.8	59	1.05	7	0.17
c53639.graph_c0	1	0.22	5	1.17	1	0.17	3	0.61	0	0	5	1.11
c37028.graph_c0	0	0	1	0.49	0	0	0	0	0	0	0	0
c33088.graph_c0	0	0	6	1.74	1	0.21	0	0	0	0	0	0
c39879.graph_c0	3	0.35	5	0.65	5	0.47	8	0.89	4	0.41	3	0.37
c22330.graph_c0	0	0	1	0.32	2	0.48	0	0	0	0	0	0
c31370.graph_c0	2	0.8	0	0	0	0	0	0	0	0	1	0.39
c71678.graph_c0	0	0	2	0.71	2	0.53	0	0	0	0	0	0
c70836.graph_c0	0	0	1	0.24	3	0.53	0	0	3	0.58	0	0
c73762.graph_c0	0	0	0	0	0	0	0	0	4	1.08	0	0
c15565.graph_c0	1	0.5	0	0	0	0	0	0	0	0	0	0
c54202.graph_c0	268	8.68	215	7.93	321	8.43	498	15.39	602	17.19	481	17.15
c73163.graph_c0	0	0	1	0.29	1	0.21	0	0	0	0	0	0
c46435.graph_c0	0	0	6	0.94	2	0.23	0	0	0	0	0	0
c36920.graph_c1	0	0	0	0	0	0	1	0.42	0	0	1	0.44
c34295.graph_c0	0	0	0	0	0	0	0	0	2	0.73	0	0
c49376.graph_c0	18	2.64	15	2.42	25	3.14	11	1.53	12	1.56	24	3.71
c58773.graph_c0	1290	80.37	1063	74.26	1489	75.77	809	49.06	968	52.26	732	49.14
c54016.graph_c0	67	5.43	59	5.35	56	3.65	52	4.03	43	3.14	39	3.42
c37534.graph_c0	0	0	0	0	0	0	0	0	15	2.67	0	0
c60461.graph_c1	240	18.29	317	22.63	354	18.74	140	8.58	270	15.06	175	9.56
c32287.graph_c0	0	0	3	0.94	2	0.47	0	0	1	0.26	0	0
c61091.graph_c0	568	6.51	776	9.84	853	9.39	329	3.58	472	4.74	238	3.03
c40074.graph_c0	0	0	0	0	2	0.52	1	0.31	1	0.29	0	0
c48606.graph_c0	5	0.66	8	1.17	11	1.17	0	0	0	0	4	0.56
c55984.graph_c0	544	26.43	684	37.47	805	31.51	348	16.24	420	18.16	294	15.68
c45171.graph_c0	8	0.28	71	2.85	10	0.29	1	0.03	0	0	0	0
c49526.graph_c0	4	0.28	11	0.86	3	0.17	1	0.07	4	0.25	1	0.08
c2156.graph_c0	2	0.33	4	0.73	1	0.13	0	0	0	0	2	0.35
c59487.graph_c0	200	10.46	215	13.1	259	10.54	235	12.21	235	10.93	179	10.35
c59205.graph_c1	1828	32.8	2033	42.02	2154	31.48	1322	23.59	1514	24.14	1044	21.34
c58800.graph_c1	481	10.16	572	13.19	633	10.3	444	8.67	592	10.64	460	10.35
c53528.graph_c0	0	0	3	0.29	2	0.14	3	0.24	8	0.61	3	0.28
c43882.graph_c0	0	0	0	0	0	0	0	0	6	2.07	0	0
c36499.graph_c0	14	1.81	2	0.29	4	0.4	2	0.24	1	0.11	4	0.55
c59214.graph_c1	0	0	0	0	3	1.18	0	0	0	0	0	0
c39666.graph_c0	5	0.89	6	1.16	10	1.42	0	0	0	0	2	0.37
c62701.graph_c0	1	0.15	7	1.14	2	0.24	3	0.42	2	0.26	0	0
c58181.graph_c0	1904	41.9	2342	56.03	2542	43.78	1540	33.18	2053	38.6	1099	26.96
c60628.graph_c1	69	1.05	144	2.65	146	1.97	22	0.39	69	1.1	22	0.45
c32981.graph_c0	1	0.24	0	0	2	0.37	0	0	0	0	0	0
c48159.graph_c0	15	1.65	15	1.85	21	1.86	49	5.99	25	2.48	36	4.7
c62920.graph_c0	0	0	0	0	0	0	0	0	15	4.46	0	0
c60520.graph_c0	3512	61.14	2269	45.2	4176	58.99	13319	226	14474	226.2	11389	221.41
c54616.graph_c0	1521	26.24	1297	25.24	1623	22.47	1390	23.02	1506	23.06	1132	21.63
c46637.graph_c0	2	0.72	0	0	2	0.57	0	0	3	0.74	1	0.28
c31137.graph_c0	0	0	6	1.29	0	0	0	0	5	0.87	0	0
c57306.graph_c3	4	0.36	1	0.1	8	0.83	2	0.17	0	0	4	0.39
c50926.graph_c0	0	0	1	0.41	1	0.31	0	0	1	0.34	0	0
c66415.graph_c0	0	0	0	0	0	0	0	0	9	2.33	0	0
c76986.graph_c0	0	0	0	0	0	0	0	0	5	0.66	0	0
c50594.graph_c0	1	0.08	1	0.09	17	1.1	7	0.68	11	0.77	2	0.17
c66930.graph_c0	0	0	0	0	0	0	0	0	9	1.83	0	0
c65613.graph_c0	0	0	0	0	0	0	1	0.27	3	0.75	2	0.58
c64771.graph_c0	6	1.7	0	0	2	0.45	0	0	0	0	0	0
c46277.graph_c0	5	0.87	1	0.19	0	0	4	0.65	7	1.07	3	0.54
c34748.graph_c1	0	0	0	0	0	0	0	0	0	0	2	0.85
c52515.graph_c1	6	0.75	7	0.96	10	1	8	0.94	4	0.44	9	1.28
c55700.graph_c0	51	9.94	17	3.61	51	7.94	49	8.96	30	5.15	31	6.26
c57084.graph_c2	171	4.98	190	6.31	218	5.08	25	0.66	78	2.34	32	0.98
c64391.graph_c0	3	0.74	0	0	0	0	3	0.69	0	0	0	0
c50428.graph_c0	1	0.32	0	0	4	1.01	0	0	1	0.28	1	0.32
c32450.graph_c0	4	0.83	3	0.67	6	0.99	0	0	0	0	0	0
c50592.graph_c0	0	0	0	0	8	0.85	6	0.76	7	0.82	5	0.7
c30290.graph_c0	2	0.33	7	1.27	0	0	4	0.62	0	0	0	0
c42136.graph_c1	0	0	0	0	0	0	0	0	11	1.91	0	0
c64023.graph_c0	0	0	1	0.41	0	0	3	1.07	0	0	0	0
c56773.graph_c0	5	0.81	10	1.53	10	1.21	4	0.88	5	0.93	0	0
c50173.graph_c0	1569	67.09	1319	63.76	1978	68.89	1335	54.8	1618	61.45	1201	55.61
c55723.graph_c0	163	6.76	240	11.66	258	8.34	44	2.85	97	4.04	44	1.97
c58568.graph_c0	18	0.83	6	0.31	19	0.71	1	0.04	2	0.08	1	0.05
c60303.graph_c1	3	1.35	13	6.11	26	8.99	3	1.14	15	5.67	3	1.28
c33626.graph_c0	0	0	3	1.04	0	0	0	0	0	0	0	0
c51770.graph_c1	3	1.08	2	0.76	4	1.13	8	2.64	3	0.93	2	0.71
c33521.graph_c1	0	0	0	0	0	0	0	0	2	0.67	0	0
c53070.graph_c0	13	0.49	27	1.15	60	1.83	5	0.18	2	0.07	0	0
c67418.graph_c0	0	0	0	0	0	0	3	1.09	1	0.34	0	0
c55553.graph_c2	117	3.13	362	11.01	269	5.88	134	3.86	141	3.58	81	2.54
c56343.graph_c0	117	4.1	311	12.32	213	6.02	160	5.82	221	7.02	134	5.23
c942.graph_c0	0	0	0	0	0	0	0	0	0	0	1	0.32
c66284.graph_c0	0	0	2	0.46	0	0	0	0	0	0	1	0.22
c54305.graph_c1	0	0	0	0	0	0	0	0	9	2.18	0	0
c55384.graph_c1	0	0	1	0.32	1	0.24	0	0	0	0	0	0
c38944.graph_c0	0	0	1	0.46	2	0.69	0	0	0	0	0	0
c51776.graph_c0	9	1.57	2	0.38	6	0.86	5	0.8	10	1.42	4	0.73
c41457.graph_c0	0	0	0	0	0	0	0	0	0	0	2	0.78
c48777.graph_c1	3	0.89	1	0.32	2	0.47	1	0.27	4	1.04	0	0
c76004.graph_c0	0	0	0	0	0	0	2	0.89	0	0	0	0
c54098.graph_c0	63	8.37	40	5.92	74	7.83	49	6.19	33	3.97	48	6.93
c40087.graph_c0	0	0	1	0.38	0	0	1	0.33	0	0	1	0.36
c54020.graph_c2	94	9.9	123	14.45	203	17.26	71	7.12	123	11.47	103	11.62
c64992.graph_c0	0	0	0	0	4	1.06	0	0	4	1.16	0	0
c43369.graph_c0	0	0	3	0.48	3	0.35	0	0	0	0	1	0.15
c56614.graph_c0	31	0.91	97	3.19	167	3.95	68	1.92	449	12.02	89	3.01
c48563.graph_c0	12	1.36	0	0	4	0.41	0	0	0	0	0	0
c3660.graph_c1	0	0	0	0	0	0	3	1.35	0	0	0	0
c43545.graph_c0	0	0	0	0	2	0.16	11	1.07	3	0.27	3	0.33
c72837.graph_c0	0	0	0	0	0	0	0	0	2	0.45	2	0.52
c31249.graph_c0	0	0	1	0.49	2	0.73	0	0	0	0	2	0.91
c32978.graph_c0	0	0	0	0	3	1.06	1	0.41	0	0	0	0
c50867.graph_c0	0	0	0	0	0	0	0	0	3	1.21	0	0
c1723.graph_c0	0	0	0	0	0	0	0	0	0	0	1	0.3
c69920.graph_c0	0	0	0	0	0	0	0	0	3	1.07	1	0.41
c43614.graph_c1	0	0	0	0	0	0	0	0	3	0.41	0	0
c41612.graph_c0	0	0	0	0	0	0	0	0	0	0	1	0.27
c38405.graph_c0	0	0	0	0	0	0	1	0.14	43	5.6	0	0
c62392.graph_c0	7	1.14	5	0.89	6	0.78	0	0	0	0	3	0.51
c44855.graph_c0	1	0.22	4	0.97	7	1.25	0	0	0	0	0	0
c59615.graph_c5	0	0	2	0.54	3	0.63	0	0	1	0.23	0	0
c33594.graph_c0	0	0	4	1.13	0	0	2	0.49	0	0	1	0.27
c62793.graph_c0	0	0	0	0	0	0	0	0	11	4.33	0	0
c37125.graph_c0	4	1.16	3	0.93	6	1.38	0	0	3	0.76	3	0.87
c60949.graph_c1	3005	116.15	2285	101.84	3121	97.78	3922	149.47	3695	131.61	3285	140.26
c51263.graph_c0	44	4.71	49	5.59	65	5.69	47	4.77	56	5.21	37	4.29
c76715.graph_c0	1	0.21	0	0	4	0.68	1	0.2	0	0	0	0
c55131.graph_c0	22	0.87	42	2.13	36	1.11	11	0.48	34	1.31	14	0.71
c35438.graph_c0	3	0.26	9	0.86	6	0.41	0	0	0	0	0	0
c48160.graph_c0	4368	424.09	6156	665.68	5779	451.11	2947	272.83	4531	389.9	2551	266.4
c54455.graph_c0	147	5.76	234	10.37	228	7.21	296	11.18	401	14.01	192	8.29
c30495.graph_c0	0	0	1	0.12	1	0.09	0	0	19	1.87	0	0
c31273.graph_c1	0	0	4	0.88	4	0.65	1	0.19	0	0	0	0
c33955.graph_c0	4	1.46	5	1.93	7	2.02	0	0	0	0	7	2.53
c30767.graph_c0	2	0.4	6	1.29	4	0.63	0	0	0	0	3	0.62
c47513.graph_c0	13	1.19	13	1.33	22	1.62	10	0.88	2	0.16	1	0.1
c54944.graph_c0	194	10.93	281	17.82	221	10.04	161	8.71	190	9.51	101	6.22
c58527.graph_c0	753	27.79	819	31.27	868	26.23	834	27.49	879	24.75	689	25.06
c55232.graph_c0	10	0.33	57	2.11	44	1.16	458	14.49	402	11.72	409	14.79
c59436.graph_c0	1	0.35	5	1.85	3	0.83	3	0.96	0	0	0	0
c60365.graph_c0	1413	17.45	1970	27.67	2104	21	1297	15.5	1864	20.5	1104	15.17
c41047.graph_c1	0	0	0	0	2	0.8	0	0	0	0	0	0
c59012.graph_c0	175	3.81	158	3.89	284	4.99	91	1.91	91	1.76	70	1.68
c63539.graph_c0	0	0	0	0	0	0	0	0	5	1.38	0	0
c50875.graph_c0	4	0.51	6	0.85	9	0.93	0	0	1	0.11	4	0.55
c65968.graph_c0	0	0	1	0.47	4	1.4	0	0	1	0.38	0	0
c69192.graph_c0	0	0	1	0.47	0	0	0	0	0	0	0	0
c58660.graph_c1	0	0	4	1.68	0	0	0	0	0	0	0	0
c64186.graph_c0	1	0.26	1	0.28	1	0.2	0	0	7	1.57	2	0.52
c58726.graph_c2	45	3.74	52	3.49	98	4.66	12	0.71	46	3.34	7	0.48
c48886.graph_c0	5	0.61	5	0.68	12	1.18	1	0.12	2	0.22	5	0.65
c47154.graph_c0	5	1.52	7	2.26	12	2.88	8	2.24	10	2.64	8	2.43
c60062.graph_c1	158	4.43	227	8.26	268	7.04	89	3.39	161	6.48	49	2.57
c9607.graph_c0	3	1.35	0	0	0	0	0	0	4	1.54	0	0
c74016.graph_c0	0	0	0	0	0	0	0	0	4	1.7	0	0
c60074.graph_c0	972	19.68	1264	29.12	1107	18.13	895	17.73	1111	20.41	661	15.09
c43285.graph_c0	0	0	0	0	0	0	0	0	7	1.86	0	0
c53421.graph_c0	108	4.26	205	8.44	182	5.5	160	6.74	175	6.44	95	5.62
c38413.graph_c1	2	0.59	0	0	0	0	0	0	0	0	0	0
c41174.graph_c0	0	0	0	0	0	0	0	0	0	0	0	0
c52121.graph_c0	18	1.6	31	3.08	55	3.94	23	1.95	27	2.13	10	0.96
c43029.graph_c1	0	0	0	0	0	0	0	0	0	0	0	0
c64725.graph_c0	2	0.76	2	0.8	1	0.3	0	0	1	0.33	0	0
c52437.graph_c0	11	0.53	9	0.49	15	0.58	9	0.42	12	0.51	6	0.54
c46769.graph_c0	5	0.48	1	0.11	3	0.23	2	0.18	3	0.26	4	0.41
c56159.graph_c1	9	1.18	11	1.42	9	0.8	5	0.38	8	0.64	3	0.35
c64434.graph_c0	2	0.68	0	0	0	0	0	0	0	0	0	0
c62675.graph_c0	0	0	1	0.43	1	0.33	0	0	5	1.78	3	1.22
c56406.graph_c0	237	9.14	291	12.64	300	9.07	115	4.13	162	5.57	112	4.56
c62294.graph_c0	0	0	0	0	0	0	0	0	13	4.09	0	0
c48616.graph_c1	0	0	0	0	3	0.83	0	0	0	0	0	0
c76419.graph_c0	0	0	0	0	0	0	0	0	4	1.76	0	0
c70101.graph_c0	0	0	0	0	0	0	4	1.18	1	0.28	0	0
c59294.graph_c2	3	0.37	3	0.41	11	1.1	0	0	1	0.11	0	0
c30268.graph_c0	0	0	0	0	0	0	4	0.44	2	0.2	4	0.49
c66811.graph_c0	1	0.19	3	0.61	6	0.9	0	0	0	0	0	0
c49905.graph_c0	290	21.78	137	11.52	219	13.24	233	16.67	193	12.82	170	13.8
c11915.graph_c0	0	0	0	0	0	0	0	0	8	0.88	0	0
c57758.graph_c0	215	10.63	158	8.81	234	9.33	98	4.66	124	5.45	98	5.31
c55325.graph_c0	1633	159.33	560	61.19	1284	101.25	726	68.51	595	51.12	563	60.74
c57102.graph_c0	76	2.71	134	4.22	128	2.82	32	0.63	101	2.36	36	0.76
c62198.graph_c0	4	1.12	1	0.3	8	1.77	0	0	1	0.24	4	1.13
c54748.graph_c0	211	11.01	157	9.23	355	14.94	95	4.76	167	7.75	158	9.03
c72342.graph_c0	0	0	0	0	0	0	3	0.65	1	0.2	1	0.24
c55525.graph_c0	166	5.34	246	8.96	235	6.1	102	3.16	173	4.95	117	4.16
c50297.graph_c1	8	2.78	14	4.17	9	1.63	4	0.47	5	0.41	6	1.68
c47730.graph_c0	2	0.65	7	2.41	8	2.05	3	0.9	17	4.79	10	3.23
c39290.graph_c2	0	0	0	0	0	0	0	0	6	1.8	0	0
c56790.graph_c0	111	3.62	112	3.96	121	3.22	165	5.04	142	3.91	72	2.47
c60528.graph_c2	160	14.78	212	21.84	222	16.5	97	8.55	99	8.11	79	7.88
c51935.graph_c0	27	1.31	30	1.52	51	1.97	34	1.51	4	0.27	4	0.16
c33968.graph_c0	0	0	1	0.47	0	0	0	0	0	0	0	0
c60317.graph_c0	185	5.36	200	4.91	234	4.91	125	3.46	171	5	105	2.99
c56801.graph_c0	25	0.78	37	1.34	20	0.5	20	0.6	18	0.5	7	0.24
c46453.graph_c0	46	4.78	90	10.4	86	7.18	32	3.17	51	4.7	24	2.68
c62545.graph_c0	0	0	0	0	0	0	0	0	0	0	0	0
c81026.graph_c0	0	0	0	0	0	0	0	0	1	0.34	2	0.77
c10833.graph_c0	0	0	0	0	0	0	0	0	0	0	2	0.91
c47873.graph_c0	2	0.46	8	1.99	4	0.73	9	1.93	2	0.59	3	0.71
c60388.graph_c0	0	0	2	0.55	0	0	0	0	0	0	1	0.26
c45165.graph_c0	2	0.93	5	2.43	6	2.19	0	0	12	4.79	0	0
c58421.graph_c0	77	3.1	82	3.71	80	2.58	27	1.03	61	2.16	18	0.79
c70051.graph_c0	0	0	4	0.75	4	0.55	0	0	0	0	0	0
c56713.graph_c0	75	2.8	228	9.74	194	5.85	71	3.63	104	4.49	62	3.58
c55451.graph_c6	7	1.46	4	0.9	15	2.49	0	0	0	0	0	0
c56909.graph_c3	505	38.6	315	27.22	513	31.64	321	23.16	292	19.6	272	22.18
c50111.graph_c0	5	0.7	15	2.32	11	1.24	2	0.27	4	0.5	3	0.58
c59796.graph_c0	869	16.96	789	18.91	1148	17.88	855	16.57	1043	19.83	796	17.79
c17090.graph_c0	0	0	0	0	0	0	0	0	2	0.73	0	0
c53975.graph_c1	0	0	0	0	0	0	4	1.02	0	0	0	0
c52339.graph_c0	10	2.48	12	3.21	10	1.97	40	9.24	48	10.44	31	7.83
c56258.graph_c3	437	29.79	267	22.93	473	27.65	298	18.49	272	16.85	236	16.06
c43673.graph_c0	6	0.67	1	0.12	4	0.36	0	0	0	0	0	0
c49337.graph_c0	3	0.63	1	0.23	1	0.17	1	0.19	5	0.89	1	0.21
c37216.graph_c0	0	0	0	0	0	0	0	0	54	4.4	0	0
c70882.graph_c0	0	0	0	0	0	0	0	0	2	0.67	0	0
c53367.graph_c0	1313	47.78	1481	60.89	1585	46.55	703	24.74	900	29.28	493	19.86
c30906.graph_c0	2	0.57	1	0.31	2	0.46	7	1.86	2	0.5	0	0
c87157.graph_c0	0	0	0	0	1	0.36	0	0	0	0	0	0
c35912.graph_c0	0	0	0	0	0	0	0	0	0	0	0	0
c39974.graph_c0	7	1.9	0	0	4	0.86	0	0	0	0	0	0
c48504.graph_c0	2	0.2	1	0.11	3	0.24	0	0	3	0.26	5	0.52
c55024.graph_c0	69	5.53	144	11.93	101	5.8	57	4.78	87	5.91	28	2.24
c61070.graph_c1	258	7.47	332	13.06	409	11.14	208	5.9	296	7.52	175	5.66
c55343.graph_c1	29	2.76	45	4.85	41	3.08	11	0.92	30	2.36	9	0.85
c31961.graph_c0	1	0.32	4	1.36	3	0.76	0	0	0	0	0	0
c32551.graph_c0	0	0	0	0	0	0	0	0	7	1.1	0	0
c47715.graph_c0	72	30.24	30	13.2	45	14.83	130	50.27	141	50.93	207	85.07
c41805.graph_c1	4	0.69	1	0.19	0	0	0	0	0	0	0	0
c42829.graph_c0	5	0.39	4	0.35	1	0.06	2	0.15	1	0.07	8	0.68
c58658.graph_c2	309038	14943.5	258345	14054.5	421691	16440.7	387738	18002	383233	16470	337664	17898.2
c54524.graph_c0	1	0.5	2	1.04	4	1.57	2	0.91	0	0	5	2.43
c56015.graph_c1	2516	51.01	1721	39.29	3916	63.84	1079	19.55	1349	22.73	1300	27.31
c65272.graph_c0	0	0	0	0	2	0.61	0	0	0	0	0	0
c41471.graph_c1	0	0	0	0	3	0.72	0	0	0	0	0	0
c26274.graph_c0	2	0.37	0	0	4	0.6	0	0	0	0	0	0
c64669.graph_c0	1	0.33	1	0.35	3	0.78	0	0	0	0	5	1.63
c80007.graph_c0	0	0	0	0	0	0	0	0	7	0.99	0	0
c77012.graph_c0	1	0.28	0	0	2	0.44	1	0.26	0	0	0	0
c78396.graph_c0	0	0	0	0	0	0	0	0	4	1.38	0	0
c54566.graph_c0	20	4.11	10	2.04	21	2.55	14	2.31	18	2.56	25	4.81
c48789.graph_c0	1	0.14	1	0.16	4	0.46	0	0	0	0	2	0.3
c30751.graph_c0	0	0	0	0	0	0	4	0.79	0	0	1	0.22
c56796.graph_c1	61	7.38	47	6.45	55	5.84	105	8.36	85	6.6	93	9.43
c61434.graph_c0	798	11.23	835	13.35	1142	12.88	554	15.8	599	13.6	410	11.42
c69843.graph_c0	0	0	0	0	0	0	0	0	9	1.21	0	0
c79437.graph_c0	0	0	0	0	2	0.58	0	0	0	0	0	0
c49977.graph_c0	0	0	0	0	0	0	6	1.02	6	0.96	9	1.7
c43971.graph_c0	5	1.49	0	0	1	0.45	0	0	1	0.25	1	0.29
c32807.graph_c0	0	0	0	0	1	0.26	0	0	1	0.28	0	0
c76804.graph_c0	0	0	0	0	3	0.95	0	0	0	0	0	0
c29652.graph_c1	2	0.71	0	0	4	1.12	0	0	0	0	0	0
c16173.graph_c0	0	0	3	1.03	0	0	0	0	0	0	2	0.64
c53305.graph_c0	2	0.32	6	1.04	4	0.51	2	0.3	11	1.54	0	0
c34384.graph_c0	34	5.78	28	4.89	43	5.33	0	0	0	0	0	0
c21743.graph_c0	0	0	0	0	3	0.77	1	0.3	0	0	0	0
c44417.graph_c0	0	0	0	0	2	0.73	0	0	0	0	4	1.81
c55109.graph_c0	765	36.8	846	45.88	1011	39.18	802	36.65	925	39.08	690	35.98
c57772.graph_c0	873	10.63	2075	28.73	1308	12.91	568	6.66	979	10.64	389	5.26
c43372.graph_c0	3	0.4	11	1.31	10	0.86	7	0.71	7	0.83	0	0
c60097.graph_c0	368	10.58	398	15.97	552	13.13	292	8.98	444	12.13	236	7.85
c34459.graph_c0	2	0.48	0	0	0	0	5	1.11	1	0.21	0	0
c71393.graph_c0	2	0.73	0	0	3	0.86	0	0	0	0	0	0
c59227.graph_c0	130	2.4	89	1.86	222	3.61	36	0.64	53	0.87	24	0.49
c45225.graph_c0	2	0.54	5	1.44	0	0	0	0	0	0	0	0
c62001.graph_c0	0	0	1	0.28	1	0.2	1	0.24	9	2.02	2	0.52
c55615.graph_c2	5	1.94	9	3.68	3	0.92	1	0.36	2	0.67	2	0.76
c57079.graph_c0	19	2.91	41	6.89	33	4.04	18	2.65	21	2.84	18	2.9
c30025.graph_c0	2	0.43	6	1.38	8	1.36	12	2.39	8	1.5	5	1.1
c34562.graph_c0	0	0	1	0.39	2	0.59	0	0	1	0.32	0	0
c47405.graph_c0	7	1.73	14	3.73	13	2.56	1	0.24	12	2.6	1	0.25
c40430.graph_c1	0	0	0	0	1	0.32	0	0	0	0	0	0
c31888.graph_c0	1	0.13	2	0.29	6	0.63	4	0.49	0	0	0	0
c73433.graph_c0	0	0	0	0	0	0	0	0	5	0.92	1	0.21
c60733.graph_c2	1	0.17	0	0	3	0.4	1	0.16	1	0.15	2	0.35
c54620.graph_c2	69	4.55	175	14.27	123	6.34	99	5.68	100	6.19	81	5.37
c64003.graph_c0	0	0	3	0.61	1	0.15	0	0	1	0.16	0	0
c29071.graph_c0	2	0.35	2	0.39	0	0	3	0.5	1	0.16	1	0.18
c51044.graph_c0	3	0.65	2	0.47	2	0.35	3	0.61	2	0.38	0	0
c42904.graph_c0	0	0	0	0	0	0	0	0	41	3.15	0	0
c15993.graph_c0	2	0.28	0	0	0	0	3	0.4	2	0.25	0	0
c51433.graph_c1	19	0.77	5	0.23	33	1.07	21	0.82	30	1.08	29	1.3
c57611.graph_c1	0	0	0	0	1	0.24	0	0	0	0	0	0
c72907.graph_c0	0	0	0	0	0	0	0	0	4	1.68	0	0
c77903.graph_c0	0	0	0	0	1	0.39	0	0	0	0	0	0
c45521.graph_c0	0	0	7	2.61	0	0	0	0	0	0	0	0
c52516.graph_c0	12	0.51	50	2.48	18	0.63	4	0.17	10	0.4	0	0
c53220.graph_c0	107	6.25	104	6.53	144	6.45	123	7	88	4.65	113	7.2
c70614.graph_c0	0	0	0	0	0	0	0	0	8	1	0	0
c69585.graph_c0	0	0	0	0	0	0	0	0	4	1.21	0	0
c62829.graph_c0	0	0	0	0	0	0	0	0	22	2.46	0	0
c60783.graph_c0	322	6.33	403	8.94	447	6.94	285	5.46	329	5.68	229	4.84
c86692.graph_c0	2	0.92	0	0	0	0	0	0	0	0	0	0
c55365.graph_c0	96	3.05	55	1.92	164	4.23	78	2.39	106	3.08	98	3.58
c64060.graph_c0	0	0	0	0	0	0	0	0	11	1.94	0	0
c73419.graph_c0	0	0	0	0	0	0	0	0	0	0	0	0
c61737.graph_c0	3	0.74	2	0.53	9	1.78	3	0.69	4	0.87	2	0.51
c58357.graph_c3	1135	28.86	659	17.36	1274	25.33	913	33.62	691	24.24	827	30.87
c52475.graph_c0	1310	32.43	524	14.71	1071	21.42	2496	59.65	2988	65.88	2326	63.78
c80887.graph_c0	0	0	0	0	2	0.42	2	0.49	0	0	0	0
c59507.graph_c0	2882	78.75	1325	39.75	2279	49.4	1559	41.14	1612	39.12	1670	50.76
c31373.graph_c0	0	0	3	1.01	2	0.5	0	0	0	0	0	0
c58369.graph_c0	834	18.32	700	15.33	1216	21.07	196	4.56	257	4.08	188	4.21
c60948.graph_c0	5717	90.93	5372	74.47	9591	96.69	7938	112.29	9755	105.62	7908	116.71
c46575.graph_c0	2	0.2	2	0.23	0	0	1	0.1	6	0.54	1	0.11
c78772.graph_c0	0	0	0	0	3	0.73	0	0	1	0.27	0	0
c33535.graph_c0	0	0	0	0	0	0	0	0	0	0	0	0
c64766.graph_c0	0	0	0	0	0	0	4	0.68	2	0.32	4	0.75
c45287.graph_c0	1	0.13	3	0.4	11	1.15	32	3.79	13	1.41	9	1.24
c52993.graph_c1	0	0	3	0.59	1	0.14	0	0	0	0	0	0
c31028.graph_c0	0	0	0	0	1	0.28	2	0.65	2	0.61	1	0.35
c30842.graph_c1	0	0	0	0	0	0	1	0.35	2	0.65	1	0.37
c60891.graph_c0	1	0.35	2	0.74	2	0.55	6	1.73	9	2.39	3	0.88
c65116.graph_c0	2	1.04	0	0	0	0	4	1.88	0	0	0	0
c68421.graph_c0	0	0	0	0	4	1.19	0	0	0	0	0	0
c80633.graph_c0	0	0	1	0.45	0	0	1	0.39	0	0	0	0
c56514.graph_c1	14	1.11	20	1.77	27	1.72	7	0.58	21	1.48	6	0.57
c52660.graph_c0	1059	35.32	351	12.29	872	23.77	1986	64.52	2064	60.61	1604	58.14
c51828.graph_c0	551	84.29	468	85.22	638	85.3	461	73.64	376	57.92	446	83.67
c51506.graph_c0	3	0.1	35	1.38	22	0.62	5	0.17	17	0.53	0	0
c63943.graph_c0	2	0.51	2	0.55	1	0.2	0	0	0	0	0	0
c59328.graph_c0	2954	85.9	2593	85.69	4032	94.57	1164	34.63	1309	35.81	1083	36.59
c52866.graph_c1	11	1.83	17	3.28	30	4	4	0.63	5	0.74	5	0.87
c57931.graph_c0	536	14.57	544	17.61	639	14.03	403	10.52	412	9.93	405	12.12
c35597.graph_c0	0	0	0	0	0	0	5	2.22	0	0	0	0
c39173.graph_c0	4	1	5	1.34	6	1.19	0	0	0	0	0	0
c70506.graph_c0	0	0	0	0	0	0	0	0	5	1.35	1	0.31
c60062.graph_c0	0	0	1	0.44	0	0	0	0	0	0	1	0.41
c49164.graph_c0	0	0	0	0	0	0	0	0	95	10.2	0	0
c53447.graph_c0	5	0.25	15	0.8	17	0.67	16	0.66	42	1.58	16	0.75
c58600.graph_c2	32513	1048.27	17538	642.27	19102	501.27	65798	2043.8	70729	2028.74	49433	1762.3
c43797.graph_c1	2	0.3	0	0	0	0	4	0.57	0	0	0	0
c66968.graph_c0	2	0.18	3	0.31	9	0.66	0	0	0	0	0	0
c49103.graph_c0	0	0	13	6.27	2	0.72	0	0	2	0.79	0	0
c8751.graph_c0	0	0	5	0.69	1	0.1	0	0	0	0	0	0
c68091.graph_c0	2	0.51	5	1.38	1	0.2	0	0	0	0	0	0
c50463.graph_c0	324	47.18	162	25.97	242	28.24	135	18.59	292	37.56	201	30.88
c59632.graph_c0	1758	274.82	1130	193.95	2757	345.22	1761	259.84	1638	226.02	1714	281.5
c62662.graph_c0	1	0.2	4	0.88	6	0.97	0	0	5	0.89	1	0.21
c37086.graph_c0	0	0	0	0	0	0	0	0	8	1.4	0	0
c46076.graph_c0	2	0.47	6	1.52	2	0.37	0	0	0	0	2	0.48
c46577.graph_c1	14	1.04	4	0.3	25	1.37	3	0.19	8	0.57	7	0.6
c58536.graph_c1	57	2.51	41	2.05	78	2.76	55	2.3	64	2.47	70	3.38
c46178.graph_c0	9	1.15	7	0.99	8	0.82	6	0.72	2	0.23	17	2.28
c32150.graph_c0	2	0.48	3	0.78	2	0.38	0	0	1	0.21	0	0
c80399.graph_c0	0	0	0	0	0	0	0	0	2	0.69	0	0
c40436.graph_c0	0	0	0	0	3	1.01	0	0	0	0	0	0
c82503.graph_c0	0	0	0	0	2	0.75	0	0	0	0	0	0
c62397.graph_c0	0	0	0	0	0	0	0	0	13	5.01	0	0
c54036.graph_c0	4	1.72	8	3.67	6	2.03	0	0	0	0	0	0
c46861.graph_c0	0	0	0	0	1	0.15	0	0	6	0.96	2	0.38
c33439.graph_c0	0	0	0	0	5	1.09	3	0.77	0	0	0	0
c40116.graph_c0	5	1.12	0	0	4	0.71	1	0.21	0	0	1	0.23
c8031.graph_c0	3	1.41	0	0	0	0	1	0.43	0	0	0	0
c85950.graph_c0	0	0	0	0	0	0	0	0	2	0.76	0	0
c60509.graph_c0	100	1.62	365	5.03	255	2.55	20	0.23	70	0.76	6	0.32
c43258.graph_c0	0	0	3	0.65	2	0.74	0	0	2	0.35	0	0
c2242.graph_c0	2	0.49	4	1.06	0	0	0	0	0	0	0	0
c61235.graph_c0	2973	30.21	2460	28.45	3741	30.73	2232	22.28	1960	18.09	1866	21.56
c56667.graph_c1	7	3.49	2	1.04	6	2.33	0	0	1	0.43	1	0.48
c80003.graph_c0	0	0	0	0	0	0	0	0	4	0.96	0	0
c3745.graph_c1	0	0	0	0	0	0	0	0	2	0.59	0	0
c47294.graph_c0	6	0.67	3	0.49	8	0.71	7	0.76	4	0.4	2	0.24
c53011.graph_c0	17	3.01	52	10	21	2.98	4	0.67	23	3.58	1	0.19
c42451.graph_c0	0	0	0	0	0	0	0	0	0	0	3	1.26
c76023.graph_c0	0	0	0	0	0	0	3	1.31	0	0	0	0
c58999.graph_c0	394	8.03	534	12.39	658	10.91	224	4.5	368	6.83	214	4.93
c63640.graph_c0	0	0	0	0	0	0	0	0	0	0	5	2.35
c30472.graph_c0	3	0.69	3	0.74	3	0.55	1	0.21	0	0	0	0
c52578.graph_c1	2	0.6	1	0.32	0	0	0	0	0	0	0	0
c48382.graph_c0	1	0.05	29	1.68	5	0.21	0	0	51	2.33	0	0
c71674.graph_c0	0	0	0	0	0	0	1	0.18	2	0.33	1	0.19
c56986.graph_c0	341	14.57	448	20.77	540	19.81	171	9.22	253	10.45	168	9.38
c60961.graph_c0	5961	75.56	3062	44.3	6075	60.44	5901	65.66	5179	53.19	4622	57.75
c55416.graph_c6	5	0.57	23	2.89	10	0.91	8	0.86	14	1.41	1	0.12
c59552.graph_c1	1483	37.19	1738	41.44	1674	31.18	1012	21.17	1431	26.33	890	20.89
c62042.graph_c0	5	0.9	2	0.39	4	0.58	2	0.34	7	1.12	4	0.75
c59083.graph_c0	1143	21.07	1673	35.03	1611	24.08	936	16.65	1248	20.38	735	15.35
c54641.graph_c0	10	0.5	29	1.65	19	0.88	13	0.59	3	0.15	2	0.12
c48044.graph_c0	0	0	8	2	0	0	0	0	4	0.76	0	0
c58675.graph_c1	664	11.87	844	16.59	804	11.25	411	6.85	533	8.22	411	7.93
c2075.graph_c0	0	0	0	0	0	0	0	0	2	0.79	0	0
c29158.graph_c1	0	0	0	0	0	0	0	0	5	0.91	0	0
c40029.graph_c0	1	0.32	1	0.34	2	0.51	0	0	0	0	0	0
c60955.graph_c0	21	3.06	24	3.85	36	4.2	35	4.95	17	2.19	22	3.38
c29586.graph_c1	1	0.22	0	0	0	0	7	1.47	5	0.98	1	0.23
c55110.graph_c3	0	0	0	0	3	0.57	0	0	0	0	0	0
c45470.graph_c0	0	0	2	0.56	2	0.42	0	0	0	0	0	0
c62779.graph_c0	1	0.07	0	0	4	0.22	3	0.2	7	0.42	21	1.56
c73001.graph_c0	0	0	0	0	2	0.77	0	0	0	0	0	0
c56392.graph_c2	59	0.94	53	1.46	71	1.04	0	0	4	0.1	1	0.02
c50508.graph_c1	1	0.29	0	0	4	0.91	0	0	1	0.25	0	0
c53223.graph_c2	56	3.54	35	2.48	37	1.88	5	0.3	0	0	0	0
c72717.graph_c0	0	0	0	0	1	0.32	0	0	0	0	0	0
c67618.graph_c0	0	0	5	0.78	1	0.11	0	0	0	0	0	0
c54607.graph_c0	131	23.05	225	43.26	232	32.64	109	18.04	88	13.64	91	16.7
c61401.graph_c0	839	6.37	978	8.41	1049	6.42	483	3.55	707	4.77	401	3.41
c77395.graph_c0	0	0	0	0	0	0	0	0	1	0.43	0	0
c51814.graph_c0	2	0.22	16	2.03	11	0.97	3	0.41	2	0.19	3	0.46
c60861.graph_c0	1306	16.02	760	11.31	1394	16.49	898	12.41	951	14.62	847	13.18
c47553.graph_c0	9	0.91	0	0	8	0.65	6	0.58	8	0.71	12	1.3
c57503.graph_c0	905	21.11	965	25.53	1092	20.59	776	17.44	887	18.38	643	16.58
c80321.graph_c0	2	0.51	1	0.27	0	0	0	0	0	0	0	0
c52758.graph_c0	56	4.05	48	3.88	54	3.14	116	8.05	85	5.45	61	4.8
c29365.graph_c0	2	0.44	3	0.71	3	0.53	0	0	0	0	5	1.13
c47998.graph_c1	1	0.13	6	0.84	2	0.2	0	0	0	0	0	0
c47014.graph_c0	0	0	5	0.51	15	1.11	1	0.09	0	0	0	0
c49588.graph_c0	4	1.08	5	1.45	4	0.86	2	0.5	7	1.66	2	0.82
c33181.graph_c0	0	0	2	0.47	13	2.26	0	0	0	0	0	0
c50257.graph_c0	38	1.78	25	1.32	50	1.89	26	1.17	17	0.71	41	2.11
c51982.graph_c2	0	0	1	0.28	1	0.21	0	0	0	0	0	0
c2589.graph_c0	0	0	0	0	0	0	0	0	3	0.93	0	0
c73732.graph_c0	5	1.31	0	0	0	0	0	0	0	0	0	0
c64323.graph_c0	0	0	0	0	0	0	0	0	0	0	10	2.2
c53404.graph_c1	0	0	0	0	0	0	0	0	0	0	0	0
c47524.graph_c2	1	0.37	2	0.78	0	0	0	0	0	0	1	0.36
c32467.graph_c0	0	0	0	0	1	0.17	5	0.99	11	2.04	0	0
c135.graph_c0	0	0	0	0	0	0	0	0	0	0	0	0
c59304.graph_c0	556	10.11	647	13.44	829	12.28	284	4.88	429	6.75	225	4.49
c37553.graph_c1	0	0	0	0	0	0	0	0	28	1.38	0	0
c51146.graph_c0	0	0	0	0	0	0	0	0	39	6.57	1	0.26
c7435.graph_c0	0	0	0	0	0	0	0	0	0	0	0	0
c62164.graph_c0	0	0	0	0	0	0	0	0	9	2.32	3	0.89
c57184.graph_c0	6698	119.21	4970	100.96	7144	103.16	6347	109.7	6523	104.09	5426	107.95
c31027.graph_c0	0	0	0	0	0	0	0	0	8	1.33	0	0
c56378.graph_c0	57	2.35	102	4.74	135	4.48	56	2.22	80	2.93	55	2.49
c53804.graph_c2	12	2.65	7	1.67	6	1.06	4	0.83	1	0.19	3	0.68
c31308.graph_c0	0	0	1	0.14	0	0	3	0.36	7	0.79	1	0.13
c53998.graph_c0	22	1.49	53	4.03	16	0.87	14	0.91	12	0.72	27	1.99
c2924.graph_c0	0	0	1	0.27	2	0.4	1	0.24	1	0.22	2	0.52
c62075.graph_c0	0	0	0	0	0	0	0	0	26	4.33	0	0
c55558.graph_c0	18	0.59	49	1.83	14	0.37	7	0.22	11	0.32	3	0.11
c64951.graph_c0	0	0	0	0	0	0	0	0	7	2.56	0	0
c63455.graph_c0	0	0	3	0.63	3	0.46	2	0.36	5	0.85	0	0
c37608.graph_c0	0	0	1	0.48	0	0	2	0.84	0	0	0	0
c60584.graph_c0	98	2.36	112	2.75	176	3.28	64	1.23	130	2.42	58	1.24
c61787.graph_c0	2	0.33	0	0	0	0	5	0.78	7	1.02	24	4.14
c48572.graph_c0	8	0.59	2	0.16	9	0.53	1	0.07	5	0.33	0	0
c38613.graph_c0	1	0.21	5	2.02	1	0.39	0	0	4	1.71	0	0
c55824.graph_c0	43	1.49	73	2.4	65	1.59	32	0.9	50	1.3	35	1.12
c58234.graph_c0	2107	30.76	3567	59.8	3900	46.29	1355	18.8	2027	25.98	1279	20.51
c22253.graph_c0	0	0	0	0	0	0	0	0	2	0.61	1	0.35
c76843.graph_c0	0	0	2	0.66	0	0	0	0	0	0	0	0
c57015.graph_c1	196	13.47	120	9.27	256	14.19	287	20.29	202	13.3	208	16.7
c46768.graph_c0	0	0	0	0	0	0	0	0	15	1.71	0	0
c48451.graph_c0	0	0	5	1.24	7	1.28	0	0	0	0	0	0
c18980.graph_c0	2	0.32	3	0.52	1	0.13	0	0	1	0.14	2	0.33
c2103.graph_c0	0	0	0	0	0	0	0	0	0	0	1	0.46
c65302.graph_c0	0	0	0	0	0	0	0	0	10	1.68	0	0
c55370.graph_c0	454	17.89	212	9.42	355	11.27	488	18.48	344	12.06	414	17.95
c40244.graph_c0	0	0	0	0	2	0.77	0	0	0	0	0	0
c61508.graph_c0	333	6.76	220	5.26	360	5.97	79	3.18	125	3.34	92	3.55
c43675.graph_c0	0	0	2	0.32	1	0.12	2	0.28	0	0	3	0.46
c29853.graph_c0	16	6.9	2	0.9	12	4.06	4	1.58	15	5.56	10	4.21
c51812.graph_c0	20	2.1	30	3.5	28	2.36	26	2.64	40	3.8	5	0.57
c45498.graph_c0	30	1.47	14	0.77	35	1.38	12	0.56	16	0.7	4	0.21
c82756.graph_c0	0	0	0	0	0	0	0	0	2	0.75	0	0
c56296.graph_c0	889	92.56	631	71.21	827	67.43	886	96.32	632	68.14	664	90.96
c53046.graph_c1	21	1.59	31	2.59	38	2.28	23	1.64	14	0.93	8	0.65
c14645.graph_c0	0	0	2	0.47	0	0	0	0	0	0	2	0.44
c60684.graph_c2	983	13.1	1039	15.43	1257	13.96	1593	23.85	1791	23.95	1323	21.83
c57538.graph_c1	170	7	228	10.66	238	8.02	93	3.82	140	5.32	114	5.32
c45617.graph_c0	14	2.33	14	2.56	9	1.2	14	2.2	12	1.76	25	4.36
c62394.graph_c0	0	0	0	0	0	0	1	0.15	14	2	0	0
c55224.graph_c0	171	5.83	226	8.88	274	7.71	182	6.16	266	8.35	139	5.24
c52059.graph_c0	34	2.63	45	3.89	49	3.05	9	0.67	0	0	4	0.34
c46166.graph_c0	0	0	0	0	0	0	3	0.63	2	0.39	0	0
c59272.graph_c0	621	13.92	856	21.76	1032	18.7	320	6.93	638	12.73	292	7.25
c33738.graph_c0	12	1.85	11	1.86	4	0.49	1	0.15	2	0.27	3	0.49
c38155.graph_c1	0	0	0	0	0	0	3	0.98	0	0	0	0
c5562.graph_c0	0	0	0	0	0	0	0	0	0	0	0	0
c62461.graph_c0	0	0	0	0	0	0	0	0	18	4.01	0	0
c38560.graph_c1	8	0.5	9	0.63	8	0.4	2	0.12	2	0.11	1	0.07
c48751.graph_c0	34	2.67	180	15.81	73	4.61	1	0.08	103	7.17	2	0.17
c56010.graph_c0	61	2.74	146	7.35	171	6.14	70	2.97	118	4.78	73	3.38
c54254.graph_c0	1639	90.54	731	45.84	1082	48.73	1227	71.76	1246	65.53	825	51.84
c61354.graph_c0	30	3	25	2.9	28	2.31	13	1.29	32	2.88	23	2.48
c60757.graph_c0	744	10.47	525	8.39	769	8.73	2696	36.66	2603	32.59	2181	34.11
c81652.graph_c0	0	0	0	0	0	0	0	0	5	1.02	0	0
c52287.graph_c0	63	5.54	62	6.09	61	4.32	77	6.47	98	7.65	58	5.51
c52367.graph_c0	408	32.42	404	35.91	465	29.74	420	31.94	394	27.78	325	28
c54884.graph_c0	53	12.06	19	4.83	18	3.12	200	46.16	151	33.39	167	43.12
c17980.graph_c1	0	0	0	0	0	0	0	0	3	1.21	0	0
c48155.graph_c0	1	0.22	1	0.24	3	0.53	0	0	0	0	0	0
c47905.graph_c0	6	0.62	2	0.23	9	0.74	3	0.29	1	0.09	0	0
c60407.graph_c0	499	4.47	921	9.4	740	5.36	490	4.25	696	5.57	405	4.05
c59299.graph_c4	271	3.93	762	12.47	676	8.44	285	3.92	728	9.36	100	1.56
c61126.graph_c0	3374	20.64	7016	48.88	6138	30.36	3364	19.92	5393	29.38	2896	19.76
c47069.graph_c1	0	0	0	0	0	0	0	0	0	0	0	0
c71297.graph_c0	0	0	0	0	0	0	0	0	4	1.26	0	0
c47661.graph_c0	15	1.84	15	2.04	23	2.27	8	0.95	9	0.98	10	1.31
c42033.graph_c0	445	14.29	432	15.7	773	20.05	361	11.18	378	10.8	311	11.03
c20985.graph_c0	2	0.72	0	0	2	0.57	0	0	0	0	0	0
c53909.graph_c0	137	9.03	129	9.55	130	6.91	123	7.77	161	9.43	175	12.57
c46651.graph_c0	2	0.22	7	0.85	5	0.44	0	0	1	0.1	0	0
c40648.graph_c1	7	0.44	6	0.42	10	0.5	1	0.06	9	0.5	0	0
c59157.graph_c1	81097	3011.54	42142	1737.1	107194	3153.11	59639	2249.17	63143	2245.92	51760	2195.58
c57512.graph_c0	98	2.55	248	7.34	207	4.37	65	1.64	143	3.26	55	1.57
c35700.graph_c0	0	0	0	0	0	0	8	1.21	4	0.57	6	1.01
c75439.graph_c0	0	0	0	0	0	0	0	0	3	0.73	0	0
c12959.graph_c0	0	0	2	0.64	0	0	2	0.56	0	0	0	0
c52978.graph_c0	10	0.42	13	0.62	19	0.64	8	0.32	7	0.26	11	0.51
c41655.graph_c0	0	0	0	0	0	0	2	0.42	2	0.4	1	0.23
c50863.graph_c1	3	0.56	1	0.2	4	0.59	6	1.05	2	0.33	1	0.19
c7693.graph_c0	1	0.43	0	0	0	0	0	0	0	0	0	0
c44025.graph_c0	2	0.47	0	0	7	1.32	0	0	0	0	0	0
c46216.graph_c0	22	4.45	18	3.73	28	4.55	26	4.14	9	1.34	20	3.54
c57474.graph_c0	109	2.76	167	3.62	193	3.99	157	2.5	260	4.2	137	2.87
c75682.graph_c0	3	0.96	1	0.34	0	0	0	0	0	0	0	0
c56260.graph_c0	49	1.79	38	2.05	109	2.15	10	0.22	7	0.14	7	0.18
c57516.graph_c0	51	0.87	142	2.69	127	2.29	34	0.55	74	1.14	28	0.52
c51997.graph_c0	22	2.88	8	1.16	9	0.95	13	1.61	13	2.26	2	0.28
c34609.graph_c0	0	0	2	0.42	2	0.31	3	0.55	0	0	0	0
c74665.graph_c0	0	0	2	0.95	0	0	0	0	0	0	0	0
c46977.graph_c0	2	0.83	7	3.06	8	2.62	0	0	0	0	1	0.41
c50262.graph_c0	2	0.49	2	0.52	1	0.19	2	0.45	5	1.06	0	0
c50932.graph_c0	15	0.67	19	0.96	12	0.43	0	0	1	0.04	0	0
c53124.graph_c0	44	3.36	33	2.77	25	1.51	22	1.58	19	1.26	20	1.63
c54774.graph_c0	1325	72.91	698	44.35	1466	65.62	1721	95.76	1912	92.76	1916	125.6
c50647.graph_c0	1	0.1	2	0.21	2	0.15	7	0.64	6	0.51	3	0.31
c49016.graph_c0	5	2.16	1	0.45	4	1.28	5	0.89	7	1.17	6	1.19
c50337.graph_c1	1	0.19	0	0	4	0.62	0	0	2	0.33	0	0
c61606.graph_c0	0	0	0	0	0	0	0	0	62	7.5	0	0
c51924.graph_c0	579	25.52	327	16.29	506	18	571	24.27	450	17.73	395	19.15
c48793.graph_c0	8	0.35	29	0.97	39	0.98	0	0	21	0.61	2	0.07
c62686.graph_c0	5	0.71	2	0.31	2	0.23	6	0.81	0	0	0	0
c30836.graph_c0	0	0	0	0	0	0	9	0.92	3	0.29	1	0.12
c62381.graph_c0	0	0	0	0	0	0	0	0	12	1.33	0	0
c8611.graph_c0	0	0	2	0.34	0	0	2	0.29	4	0.54	0	0
c48939.graph_c0	8	0.89	9	1.13	13	1.18	0	0	1	0.1	3	0.37
c44234.graph_c0	0	0	0	0	0	0	0	0	0	0	0	0
c51178.graph_c0	4	0.44	2	0.22	9	0.72	3	0.31	2	0.23	2	0.27
c50609.graph_c0	332	13.31	319	14.44	410	13.26	311	12	374	13.33	226	9.97
c49054.graph_c0	229	22.16	218	23.5	224	17.43	57	5.35	92	7.94	63	6.64
c45687.graph_c0	15	1.33	4	0.4	28	2	0	0	2	0.16	0	0
c45527.graph_c0	4	0.67	4	0.73	7	0.94	0	0	2	0.3	0	0
c74976.graph_c0	0	0	0	0	2	0.73	0	0	0	0	0	0
c37916.graph_c0	5	0.82	1	0.18	9	1.18	0	0	0	0	0	0
c53569.graph_c0	87	5.55	295	21.14	186	9.56	210	12.85	134	7.59	58	4.03
c42852.graph_c0	0	0	0	0	0	0	0	0	0	0	0	0
c61314.graph_c0	0	0	1	0.25	2	0.37	0	0	3	0.62	4	0.96
c30530.graph_c0	0	0	0	0	0	0	0	0	6	1.41	0	0
c82188.graph_c0	0	0	2	0.73	0	0	0	0	0	0	0	0
c57746.graph_c0	141	3.95	201	6.94	577	13.1	47	1.26	199	5.74	0	0
c63712.graph_c0	0	0	4	1.01	0	0	0	0	0	0	0	0
c84475.graph_c0	0	0	0	0	0	0	0	0	2	0.79	0	0
c62375.graph_c0	0	0	0	0	0	0	0	0	19	4.71	0	0
c52468.graph_c0	652	32.44	437	24.5	900	36.11	373	17.84	549	24.28	432	23.56
c53860.graph_c0	74	6.25	77	6.34	86	4.22	85	7.99	88	9.57	58	8.37
c70229.graph_c0	0	0	1	0.27	3	0.59	0	0	1	0.22	0	0
c55528.graph_c0	1	0.13	1	0.15	5	0.53	1	0.12	0	0	2	0.28
c60797.graph_c4	30	1.65	38	2.27	56	2.41	9	0.47	15	0.72	13	0.77
c86393.graph_c0	0	0	0	0	0	0	0	0	3	0.86	0	0
c50108.graph_c0	1	0.11	3	0.36	1	0.09	0	0	9	0.87	0	0
c64796.graph_c0	4	1.07	3	0.86	1	0.21	0	0	0	0	2	0.54
c75978.graph_c0	0	0	0	0	2	0.77	0	0	0	0	2	0.95
c60689.graph_c3	23	1.51	32	2.36	28	1.48	27	1.7	29	1.69	23	1.64
c65522.graph_c0	0	0	5	1.97	1	0.29	0	0	0	0	0	0
c46509.graph_c0	3	0.55	1	0.2	9	1.32	3	0.52	0	0	3	0.57
c56240.graph_c2	354	13.4	309	13.59	372	11.48	138	4.86	123	4.16	116	4.69
c58316.graph_c1	853	92.18	422	50.65	1066	92.61	1198	123.18	1414	135.32	2707	313.2
c57156.graph_c0	5	0.54	5	0.6	4	0.35	0	0	0	0	2	0.23
c74232.graph_c0	0	0	0	0	0	0	0	0	5	1.31	0	0
c4508.graph_c0	2	0.91	0	0	2	0.71	0	0	0	0	0	0
c50275.graph_c0	178	20.11	160	20.05	204	18.52	171	18.36	135	13.5	91	11.1
c45083.graph_c0	0	0	0	0	0	0	30	1.11	35	1.2	27	1.14
c51228.graph_c0	24	1.07	15	0.75	29	1.04	6	0.26	9	0.36	3	0.15
c64760.graph_c0	0	0	0	0	0	0	2	0.37	2	0.35	6	1.22
c71291.graph_c0	2	0.69	3	1.09	0	0	0	0	0	0	0	0
c45165.graph_c1	4	0.75	10	2.04	20	2.99	0	0	10	1.65	6	1.59
c45285.graph_c0	706	57.54	686	62.51	737	48.34	587	45.73	547	39.55	468	41.28
c46505.graph_c0	796	24.21	1647	56.74	1473	36.18	492	14.43	827	22.4	417	14.01
c62466.graph_c0	0	0	11	2.38	3	0.48	0	0	0	0	0	0
c63441.graph_c0	0	0	2	0.76	4	1.13	1	0.33	0	0	3	1.07
c46372.graph_c0	1	0.46	0	0	2	0.72	1	0.35	0	0	4	1.5
c42899.graph_c0	0	0	4	1.39	0	0	0	0	0	0	0	0
c82418.graph_c0	0	0	0	0	0	0	0	0	2	0.66	0	0
c2977.graph_c0	1	0.36	2	0.76	1	0.28	0	0	0	0	0	0
c29169.graph_c0	0	0	0	0	0	0	0	0	124	3.02	1	0.03
c40622.graph_c0	2	0.24	0	0	11	1.07	0	0	7	0.75	1	0.13
c84906.graph_c0	0	0	0	0	0	0	0	0	0	0	0	0
c52872.graph_c0	86	5.01	156	10.15	170	8.09	68	3.86	154	7.79	80	5.09
c82433.graph_c0	1	0.42	0	0	0	0	0	0	0	0	0	0
c62395.graph_c0	0	0	0	0	0	0	0	0	32	2.72	0	0
c64988.graph_c0	0	0	0	0	0	0	0	0	16	2.24	0	0
c54843.graph_c0	307	6.03	249	5.55	329	5.22	405	7.69	341	5.98	366	7.98
c60551.graph_c0	4474	106.84	2564	75.77	5558	115.02	5916	108.04	5573	87.23	5535	123.58
c34764.graph_c0	1	0.22	0	0	2	0.35	5	1.03	0	0	0	0
c62608.graph_c0	0	0	6	1.57	3	0.58	1	0.23	4	0.85	0	0
c53445.graph_c0	38	2.5	49	3.62	29	1.54	108	7.22	116	7.2	105	8.03
c80592.graph_c0	0	0	0	0	0	0	2	0.67	2	0.63	0	0
c31995.graph_c0	0	0	0	0	0	0	0	0	8	2.57	0	0
c38351.graph_c0	0	0	0	0	0	0	0	0	13	2.35	0	0
c59693.graph_c0	450	7.54	774	14.73	692	9.37	345	5.58	519	7.73	268	4.98
c65019.graph_c0	5	1.34	1	0.29	4	0.85	0	0	0	0	0	0
c56771.graph_c0	6627	165.87	2580	73.21	5719	115.79	2798	68.78	3194	72.44	1914	53.92
c7592.graph_c0	0	0	0	0	0	0	0	0	2	0.59	0	0
c53786.graph_c0	78	1.27	35	0.65	69	0.91	49	0.77	47	0.68	63	1.14
c44448.graph_c0	0	0	0	0	0	0	0	0	5	1.33	0	0
c69828.graph_c0	2	0.3	4	0.67	3	0.36	0	0	0	0	0	0
c85380.graph_c0	0	0	0	0	0	0	0	0	2	0.84	0	0
c66127.graph_c0	1	0.35	0	0	1	0.28	0	0	0	0	0	0
c33217.graph_c0	1	0.22	6	1.45	1	0.18	0	0	0	0	0	0
c508.graph_c0	0	0	1	0.28	2	0.41	0	0	0	0	0	0
c39691.graph_c0	0	0	0	0	0	0	0	0	10	1.95	0	0
c71052.graph_c0	1	0.48	0	0	2	0.76	0	0	0	0	0	0
c54639.graph_c1	10214	222.53	9043	225.37	13842	243.69	19372	409.74	21311	417.11	17647	428.97
c66424.graph_c0	2	0.71	0	0	1	0.28	2	0.65	1	0.31	0	0
c32224.graph_c0	0	0	0	0	3	0.58	0	0	6	1.29	0	0
c36451.graph_c0	0	0	0	0	0	0	0	0	0	0	0	0
c63472.graph_c0	0	0	0	0	0	0	0	0	15	1.49	0	0
c64158.graph_c0	2	0.28	0	0	2	0.22	0	0	0	0	1	0.15
c59299.graph_c0	0	0	6	1.21	5	0.74	0	0	2	0.51	0	0
c15775.graph_c0	1	0.22	1	0.23	2	0.34	0	0	2	0.38	0	0
c101.graph_c0	1	0.35	0	0	1	0.28	0	0	0	0	0	0
c8701.graph_c0	0	0	1	0.47	1	0.35	0	0	0	0	0	0
c41811.graph_c0	1	0.08	5	0.46	3	0.2	2	0.16	9	0.65	0	0
c62391.graph_c0	0	0	3	0.73	3	0.53	0	0	7	1.37	1	0.23
c54771.graph_c0	62	1.99	29	1.05	42	1.44	2	0.06	0	0	0	0
c63110.graph_c0	0	0	0	0	0	0	4	1.31	2	0.62	0	0
c15226.graph_c0	2	0.8	0	0	0	0	2	0.73	0	0	0	0
c86452.graph_c0	0	0	2	0.93	1	0.35	0	0	0	0	0	0
c56881.graph_c0	355	21.59	289	20.44	446	22.49	573	28.35	470	23.31	475	27.29
c49901.graph_c0	7	2.12	46	14.88	25	6	6	1.68	4	1.26	0	0
c31566.graph_c0	1	0.24	1	0.26	2	0.38	2	0.45	2	0.42	0	0
c45895.graph_c0	84	5.55	52	3.85	92	4.89	24	1.52	38	2.23	17	1.22
c53035.graph_c0	194	14.1	204	16.6	226	13.22	200	13.91	151	9.73	138	10.88
c60813.graph_c5	4	0.94	2	0.51	2	0.38	4	0.88	3	0.62	3	0.72
c32481.graph_c0	0	0	0	0	0	0	0	0	12	4.89	0	0
c53470.graph_c0	1678	54.6	1296	47.72	1796	47.18	1951	61.21	2044	59.18	1821	65.41
c56779.graph_c1	65	3.31	94	5.4	104	4.28	44	2.22	61	2.95	27	1.6
c42575.graph_c0	0	0	0	0	1	0.2	2	0.46	9	1.77	4	1
c54810.graph_c0	34	1.67	62	3.43	65	2.57	46	2.17	63	2.75	24	1.29
c8779.graph_c0	2	0.95	0	0	2	0.74	0	0	0	0	0	0
c67084.graph_c0	1	0.11	1	0.13	0	0	3	0.32	0	0	5	0.61
c54517.graph_c2	1248	44.04	1080	43.33	1619	46.32	783	27	760	23.95	721	28.24
c63978.graph_c0	6	2.09	0	0	3	0.83	0	0	0	0	0	0
c2979.graph_c0	0	0	0	0	2	0.46	0	0	0	0	0	0
c50566.graph_c1	7	0.46	7	0.51	8	0.43	37	2.25	14	0.76	10	0.68
c40045.graph_c0	2	0.43	1	0.23	1	0.17	0	0	3	0.57	0	0
c64993.graph_c0	0	0	0	0	0	0	0	0	8	1.54	0	0
c57258.graph_c2	9637	1101.4	5531	647.85	10781	1008.6	972	94.14	1249	98.88	1106	131.56
c33216.graph_c0	2	0.37	0	0	8	1.19	4	0.7	0	0	0	0
c50339.graph_c0	16	1.64	12	1.47	24	2.01	14	1.35	26	2.37	17	1.82
c75911.graph_c0	0	0	0	0	0	0	0	0	0	0	0	0
c53221.graph_c0	215	18.65	217	21.53	244	16.86	143	11.8	122	9.6	121	11.78
c51010.graph_c0	1086	54.89	601	34.22	1376	56.04	1135	55.08	1160	52.07	1046	57.89
c59986.graph_c3	1100	30.34	998	30.91	1245	26.05	989	21.77	1059	22.14	869	23.3
c56380.graph_c0	390	13.96	521	21.44	549	15.85	213	6.73	340	9.36	210	7.56
c60521.graph_c0	598	5.66	533	5.74	735	5.63	552	5.07	668	5.63	394	4.16
c59566.graph_c0	5001	66.96	5631	89.72	7861	87.84	3924	51.3	5072	63.26	3599	55.56
c44473.graph_c1	0	0	0	0	0	0	0	0	49	1.38	0	0
c79225.graph_c0	4	1.54	0	0	0	0	0	0	0	0	0	0
c67999.graph_c0	2	0.27	1	0.15	4	0.44	3	0.39	1	0.12	0	0
c60234.graph_c0	219	5.54	102	2.84	357	9.35	393	7.85	462	9.53	369	10.31
c44832.graph_c0	0	0	0	0	0	0	0	0	27	3.76	0	0
c53197.graph_c0	223	5.69	104	3.01	255	5.28	93	2.29	97	2.2	142	4.02
c56452.graph_c0	305	7.72	105	3.01	229	4.7	417	10.17	367	8.26	284	7.95
c45454.graph_c0	3091	554.98	528	101.22	1127	158.79	1	0.2	0	0	0	0
c57759.graph_c0	16	3.32	4	0.9	6	0.99	0	0	5	0.99	4	0.86
c60661.graph_c0	1813	28.65	1672	30.03	2765	35.31	2018	30.82	2616	36.82	2049	36
c61922.graph_c0	7	0.82	11	1.42	23	2.15	4	0.44	6	0.62	1	0.12
c44605.graph_c0	3	0.37	1	0.14	0	0	0	0	3	0.33	1	0.13
c64476.graph_c0	0	0	0	0	0	0	0	0	16	1.35	0	0
c58958.graph_c0	201	5.5	246	7.69	268	5.77	131	3.22	114	2.74	123	3.89
c47333.graph_c1	5	0.27	2	0.12	4	0.18	3	0.16	6	0.29	4	0.24
c48517.graph_c0	156	7.75	176	9.96	306	13.04	224	11.34	254	10.86	172	9.89
c59799.graph_c0	430	8.74	323	7.45	554	9.12	187	3.69	218	3.94	178	4.03
c62274.graph_c0	0	0	0	0	0	0	3	0.63	1	0.2	15	3.48
c45777.graph_c0	126	12.72	105	11.91	123	10.29	244	22.74	319	27.25	282	29.12
c29078.graph_c0	1	0.24	0	0	1	0.19	0	0	0	0	0	0
c40654.graph_c1	0	0	0	0	0	0	0	0	0	0	0	0
c63019.graph_c0	1	0.07	9	0.75	4	0.24	1	0.07	10	0.66	0	0
c54694.graph_c0	328	14.34	742	36.54	502	17.81	174	7.42	392	14.83	130	6.17
c46730.graph_c0	1	0.2	0	0	3	0.48	2	0.37	0	0	1	0.21
c59601.graph_c0	823	7.42	1034	10.62	1564	11.38	472	4.09	681	5.43	354	3.5
c72663.graph_c0	0	0	2	0.86	2	0.64	0	0	0	0	0	0
c71486.graph_c0	0	0	0	0	0	0	0	0	4	1.34	0	0
c47285.graph_c0	19	2.33	10	2.56	18	5.04	3	0.35	0	0	4	1.63
c2831.graph_c0	0	0	0	0	0	0	2	0.6	0	0	0	0
c11823.graph_c0	1	0.32	0	0	1	0.25	0	0	1	0.27	0	0
c50927.graph_c0	14	0.9	6	0.43	15	0.78	3	0.18	3	0.17	7	0.49
c50254.graph_c0	0	0	1	0.3	0	0	1	0.26	0	0	0	0
c56517.graph_c1	23	0.78	64	2.95	59	1.55	25	0.97	68	2.62	9	0.49
c30340.graph_c0	0	0	0	0	7	2.08	0	0	0	0	0	0
c45547.graph_c0	1	0.13	3	0.43	6	0.63	0	0	1	0.12	3	0.42
c53015.graph_c0	11	0.58	24	1.42	38	1.61	17	0.93	19	0.92	6	0.35
c54589.graph_c0	72	4.02	30	1.76	158	6.6	41	1.78	47	1.96	50	2.71
c70407.graph_c0	0	0	0	0	0	0	0	0	5	1.55	0	0
c1677.graph_c0	0	0	0	0	0	0	0	0	2	0.75	0	0
c68174.graph_c0	2	0.67	1	0.35	0	0	0	0	0	0	1	0.33
c54772.graph_c0	13	0.86	3	0.42	18	0.88	11	0.96	10	0.42	14	1.46
c61301.graph_c1	1	0.28	1	0.3	0	0	0	0	0	0	4	1.13
c54642.graph_c2	1250	41.22	1588	59.25	1472	39.19	689	21.91	681	19.98	566	20.6
c57527.graph_c0	151	3.77	195	6.04	195	4.37	84	2.73	86	2.44	54	1.85
c48805.graph_c0	19	2.39	12	1.77	34	3.72	8	1	3	0.35	4	0.55
c53770.graph_c0	9	1.97	17	1.9	11	1.04	6	0.89	6	0.84	6	0.46
c52612.graph_c1	19	1.56	13	1.19	40	2.63	16	1.25	14	1.02	24	2.13
c69678.graph_c0	0	0	1	0.39	2	0.58	0	0	0	0	0	0
c60200.graph_c0	487	28.26	489	32.26	542	26.08	438	27.54	512	30.06	365	25.55
c22987.graph_c0	0	0	0	0	0	0	0	0	6	1.01	0	0
c42988.graph_c0	19	4.09	5	1.17	21	3.6	27	5.43	22	4.16	26	5.76
c79493.graph_c0	0	0	0	0	2	0.75	0	0	0	0	0	0
c73518.graph_c0	0	0	2	0.54	0	0	0	0	0	0	2	0.51
c89149.graph_c0	1	0.37	0	0	0	0	0	0	0	0	0	0
c60694.graph_c0	90	2.7	59	2.11	95	2.5	58	1.81	91	2.55	78	2.75
c36780.graph_c1	0	0	0	0	0	0	0	0	10	1.69	0	0
c43289.graph_c0	0	0	0	0	0	0	0	0	0	0	2	0.69
c73604.graph_c0	0	0	0	0	0	0	0	0	3	1.29	0	0
c43873.graph_c0	0	0	1	0.48	4	1.35	0	0	0	0	0	0
c63222.graph_c0	9	1.77	0	0	4	0.63	0	0	0	0	0	0
c59489.graph_c0	840	9	1859	31.94	1421	14.65	702	9.79	1099	16.36	532	9.9
c5159.graph_c0	0	0	7	2.8	1	0.3	0	0	1	0.33	0	0
c32818.graph_c0	2	0.32	2	0.35	0	0	1	0.15	8	1.12	0	0
c56125.graph_c1	109	6.88	125	8.85	113	5.74	25	1.5	43	2.39	28	1.91
c56273.graph_c0	439	13.85	241	9.48	365	8.28	161	7.56	145	3.73	158	7.08
c69616.graph_c0	0	0	0	0	5	1.11	0	0	0	0	0	0
c50449.graph_c5	0	0	0	0	0	0	0	0	5	1.22	0	0
c46738.graph_c0	0	0	3	0.82	0	0	0	0	0	0	0	0
c45661.graph_c0	2	0.41	6	1.33	1	0.18	4	0.69	4	0.71	1	0.23
c34312.graph_c0	3	0.13	266	12.97	24	0.84	2	0.08	109	4.19	0	0
c51377.graph_c0	36	1.73	12	0.65	26	1.01	6	0.27	19	0.81	5	0.26
c42256.graph_c1	4	0.72	2	0.39	0	0	0	0	0	0	0	0
c35485.graph_c0	2	0.32	0	0	3	0.38	3	0.45	0	0	2	0.33
c53832.graph_c0	509	18.43	485	22.09	677	20.43	541	20.25	701	21.09	478	18.76
c41823.graph_c1	0	0	4	1.26	0	0	0	0	0	0	0	0
c59523.graph_c1	472	21.58	471	20.79	590	20.35	410	16.02	480	16.26	303	12.79
c51175.graph_c0	426	13.69	306	10.64	602	15.42	331	10.27	383	10.36	280	9.97
c73490.graph_c0	0	0	0	0	0	0	0	0	4	1.08	0	0
c33465.graph_c0	73	11.94	9	1.66	52	6.82	14	2.14	8	1.15	15	2.55
c62693.graph_c0	0	0	6	1.09	5	0.66	4	0.62	0	0	1	0.17
c47077.graph_c0	1	0.23	0	0	0	0	5	1.05	0	0	0	0
c55526.graph_c0	233	13.2	227	14.02	269	11.53	198	7.96	213	7.71	168	7.49
c64203.graph_c0	0	0	0	0	5	1.45	0	0	0	0	0	0
c58272.graph_c0	228	10.76	106	5.38	203	7.58	73	4.01	38	1.88	52	3.03
c57586.graph_c0	1243	46.55	905	37.2	1521	45.48	2460	87.08	2493	81.09	2242	89.47
c31216.graph_c0	2	0.32	2	0.35	2	0.25	0	0	4	0.56	0	0
c51546.graph_c0	8	0.58	2	0.16	5	0.29	6	0.42	24	1.55	13	1.03
c48613.graph_c0	2	0.64	4	1.36	7	1.78	4	1.19	5	1.39	5	1.6
c32368.graph_c0	0	0	0	0	6	1.71	0	0	0	0	1	0.36
c80469.graph_c0	3	0.42	0	0	2	0.23	0	0	0	0	0	0
c55000.graph_c0	126	7.15	251	15.67	207	10.39	125	4.3	176	6.07	82	3.37
c52139.graph_c0	8	1	3	0.42	26	2.62	0	0	8	0.89	0	0
c35322.graph_c1	0	0	0	0	1	0.39	0	0	0	0	0	0
c30079.graph_c0	22	1.71	16	1.39	11	0.69	0	0	2	0.14	0	0
c35373.graph_c0	0	0	0	0	0	0	0	0	8	1.64	0	0
c59541.graph_c0	396	12.35	257	9.09	465	11.71	599	18.09	599	16.68	584	20.16
c20348.graph_c0	1	0.14	2	0.3	4	0.44	0	0	2	0.24	0	0
c7911.graph_c0	0	0	0	0	0	0	0	0	5	1.87	0	0
c37487.graph_c1	0	0	0	0	0	0	2	0.82	0	0	0	0
c50018.graph_c0	9	1.52	8	1.48	13	1.75	10	1.59	4	0.6	4	0.71
c54991.graph_c0	239	4.6	346	7.47	324	5.11	167	2.79	257	4.05	128	2.44
c61552.graph_c0	131	7.25	76	4.74	154	6.87	80	4.25	63	3.1	61	3.69
c51253.graph_c0	55	14.32	26	7.27	49	10.14	9	2.18	12	2.73	21	5.54
c60849.graph_c0	446	30.77	267	21.88	424	27.71	441	26.53	399	24.78	264	22.22
c58652.graph_c1	179	4.18	270	6.98	245	4.2	121	2.5	202	3.93	82	2.06
c53645.graph_c0	120	4.77	228	10.36	310	9.35	199	8.31	356	11.91	139	6.44
c46625.graph_c0	90	22.63	376	101.71	192	38.39	58	13.57	176	38.74	65	16.62
c34206.graph_c0	3	1.3	1	0.45	0	0	0	0	0	0	0	0
c55029.graph_c0	11	1.05	73	7.77	25	1.92	8	0.73	20	1.77	9	0.92
c60025.graph_c0	3330	72.09	2172	53.66	2934	50.72	3776	81.03	3198	63.35	2628	63.88
c50710.graph_c0	11	0.52	8	0.64	14	0.54	11	0.94	24	1.79	0	0
c43439.graph_c0	3	0.49	3	0.54	8	1.06	1	0.16	1	0.15	7	1.21
c29543.graph_c0	0	0	20	2.34	4	0.34	0	0	0	0	0	0
c29538.graph_c0	0	0	0	0	0	0	0	0	15	2.97	0	0
c58589.graph_c0	310	14.07	723	40.4	585	24.96	202	9.71	377	18.55	136	8.2
c2149.graph_c0	0	0	2	0.9	0	0	0	0	0	0	0	0
c52498.graph_c0	206	13.78	295	22.33	234	12.83	191	12.59	219	13.34	134	9.96
c58948.graph_c2	3844	132.36	5288	191.52	6007	157.34	4050	135.99	5186	148.65	3454	134.71
c54560.graph_c0	439	21.44	421	23.17	720	28.35	567	26.38	498	21.51	329	17.56
c57960.graph_c2	113	8.69	123	10.22	145	8.74	136	10.58	114	7.46	150	11.93
c36438.graph_c0	0	0	0	0	0	0	1	0.24	1	0.23	7	1.85
c57939.graph_c0	60	3.28	112	5.62	120	4.3	57	4.13	119	5	47	1.7
c45172.graph_c0	3	0.52	2	0.38	2	0.28	1	0.16	6	0.92	0	0
c58685.graph_c0	29	2.8	59	4.89	32	1.35	10	0.68	42	2.19	8	0.44
c50074.graph_c0	8	1.46	8	1.59	5	0.73	0	0	0	0	0	0
c53192.graph_c1	1	0.39	2	1.07	13	4.25	4	1.43	18	6.54	2	0.77
c14936.graph_c0	0	0	0	0	1	0.24	4	1.12	0	0	0	0
c57292.graph_c2	4	0.66	6	1.08	9	1.18	0	0	0	0	1	0.17
c56558.graph_c3	60	5.92	53	5.82	57	4.52	57	5.29	39	3.4	46	4.9
c42409.graph_c0	0	0	0	0	0	0	0	0	8	2.73	3	1.17
c9086.graph_c0	0	0	0	0	0	0	1	0.43	2	0.81	1	0.46
c53267.graph_c2	0	0	0	0	0	0	3	0.26	175	14.79	2	0.21
c59206.graph_c0	528	20.63	481	20.87	648	21.05	414	15.41	530	18.16	347	15.11
c47263.graph_c0	3	0.26	3	0.29	14	0.99	1	0.08	1	0.08	0	0
c42251.graph_c0	98	8.03	100	9.16	220	14.51	59	4.62	132	9.6	99	8.78
c59250.graph_c0	36	0.58	34	0.7	60	0.76	59	1.49	84	1.4	72	2.31
c69799.graph_c0	0	0	0	0	0	0	0	0	0	0	0	0
c47573.graph_c0	7	1.21	8	1.51	15	2.07	2	0.32	9	1.37	12	2.16
c47950.graph_c0	0	0	0	0	0	0	6	0.39	18	1.07	12	0.88
c41932.graph_c0	2	0.77	0	0	0	0	0	0	0	0	0	0
c39393.graph_c0	0	0	1	0.31	9	2.1	0	0	0	0	0	0
c83955.graph_c0	0	0	1	0.51	0	0	0	0	0	0	0	0
c34983.graph_c0	0	0	2	0.36	2	0.26	1	0.16	0	0	0	0
c74015.graph_c0	0	0	0	0	0	0	2	0.62	0	0	1	0.33
c9353.graph_c0	3	0.65	2	0.47	0	0	0	0	0	0	0	0
c73324.graph_c0	0	0	0	0	2	0.66	0	0	2	0.73	0	0
c51737.graph_c0	10	3.91	11	4.52	19	5.84	3	1.08	3	1.01	11	4.23
c53533.graph_c0	12	0.61	16	0.92	27	1.16	5	0.33	10	0.54	0	0
c44653.graph_c0	0	0	0	0	0	0	0	0	10	1.14	0	0
c57067.graph_c2	249	18.58	292	23.84	325	19.45	190	13.91	218	14.76	178	14.88
c41674.graph_c0	58	4.41	70	5.96	60	3.68	16	1.16	49	3.31	18	1.49
c63814.graph_c0	0	0	6	1.11	3	0.4	5	0.79	0	0	0	0
c60043.graph_c0	200	4.14	74	1.93	273	4.74	36	0.66	33	0.57	14	0.52
c60695.graph_c2	645	19.25	642	20.4	783	19.64	243	7.93	368	10.5	242	7.87
c71518.graph_c0	3	0.52	2	0.38	0	0	0	0	0	0	0	0
c56417.graph_c2	35737	3061.83	20400	1921.85	33448	2295.65	44586	3169.25	40915	2677.37	39553	3123.1
c51571.graph_c0	62	3.17	75	4.34	59	2.36	16	0.78	20	0.88	15	0.8
c62958.graph_c0	2	0.56	6	1.78	1	0.22	0	0	0	0	0	0
c41530.graph_c0	5	0.76	9	1.51	6	0.73	0	0	7	0.94	1	0.16
c29246.graph_c0	1	0.42	4	1.77	1	0.33	0	0	1	0.36	0	0
c47689.graph_c0	40	3.42	22	2.1	37	2.54	26	2.12	10	0.76	20	1.85
c70404.graph_c0	3	1.12	0	0	0	0	0	0	0	0	0	0
c74197.graph_c0	0	0	0	0	0	0	1	0.27	3	0.78	0	0
c84087.graph_c0	0	0	0	0	0	0	0	0	4	0.98	0	0
c48396.graph_c0	120	33.47	99	29.55	160	35.41	142	36.72	110	26.78	106	30.02
c78125.graph_c0	1	0.28	3	0.89	0	0	0	0	0	0	0	0
c68645.graph_c0	1	0.29	1	0.31	1	0.23	0	0	2	0.51	0	0
c60017.graph_c0	606	11.64	1044	24.24	1308	21.41	1216	21.53	1670	28.94	1150	24.49
c86201.graph_c0	0	0	0	0	0	0	0	0	2	0.84	0	0
c80666.graph_c0	0	0	0	0	0	0	0	0	0	0	2	0.46
c2484.graph_c0	1	0.2	2	0.43	2	0.31	1	0.18	0	0	0	0
c31880.graph_c0	0	0	0	0	0	0	3	0.48	9	1.34	0	0
c77427.graph_c0	2	0.46	0	0	3	0.55	0	0	0	0	0	0
c40167.graph_c0	4	1.62	0	0	0	0	0	0	1	0.35	0	0
c58359.graph_c0	437	8.79	891	20.31	863	14.63	315	5.97	630	11.71	324	7.78
c58998.graph_c0	1723	38.7	1703	48.41	1869	43.16	4817	73	4084	60.57	3335	59.79
c71172.graph_c0	1	0.42	0	0	0	0	0	0	2	0.72	0	0
c5648.graph_c0	0	0	0	0	0	0	0	0	6	1.63	0	0
c59805.graph_c1	1466	21.06	2464	41.49	1760	21.29	797	11.53	1334	18.06	637	11.02
c58302.graph_c0	65	1.33	110	2.56	114	1.89	87	1.72	73	1.33	58	1.32
c55610.graph_c0	5	0.69	2	0.31	15	1.67	0	0	0	0	0	0
c41840.graph_c0	0	0	3	0.56	3	0.41	0	0	1	0.15	0	0
c30781.graph_c0	0	0	0	0	0	0	1	0.16	12	1.8	0	0
c59086.graph_c0	1872	50.13	1244	42.72	2359	55.59	1927	51.87	1883	48.37	2069	62.9
c49239.graph_c1	3	1.24	3	1.3	4	1.3	2	0.76	0	0	0	0
c51898.graph_c1	4	0.27	7	0.52	6	0.31	0	0	1	0.06	3	0.21
c75546.graph_c0	0	0	0	0	0	0	0	0	1	0.39	0	0
c88641.graph_c0	0	0	0	0	0	0	0	0	2	0.86	0	0
c58102.graph_c0	87	2.18	79	2.25	98	1.99	55	1.32	84	1.87	43	1.19
c36030.graph_c0	0	0	0	0	0	0	1	0.09	37	3.08	0	0
c31331.graph_c0	3	1.17	0	0	0	0	1	0.36	0	0	1	0.38
c65094.graph_c0	0	0	0	0	0	0	0	0	5	1.08	0	0
c61934.graph_c0	2	0.93	0	0	5	1.81	1	0.42	1	0.4	0	0
c67167.graph_c0	0	0	0	0	0	0	0	0	8	1.99	0	0
c3823.graph_c0	0	0	0	0	3	0.57	0	0	0	0	0	0
c45126.graph_c0	0	0	3	1.3	2	0.65	0	0	0	0	0	0
c42685.graph_c1	2	0.57	1	0.3	5	1.12	4	1.05	0	0	0	0
c39594.graph_c0	1	0.17	0	0	2	0.27	0	0	1	0.15	4	0.7
c56418.graph_c1	98	1.75	45	0.86	141	1.8	51	0.78	118	1.69	98	1.72
c61579.graph_c0	1794	62.79	2540	100.54	1713	48.4	1047	35.31	1493	46.49	906	34.97
c43263.graph_c0	3	0.47	2	0.35	2	0.25	0	0	2	0.28	0	0
c62577.graph_c0	1	0.42	3	1.31	6	1.96	0	0	0	0	0	0
c74615.graph_c0	0	0	2	0.97	0	0	2	0.85	0	0	0	0
c28985.graph_c0	4	0.37	2	0.21	4	0.3	5	0.44	9	0.73	1	0.1
c78241.graph_c0	0	0	2	0.67	1	0.25	0	0	0	0	0	0
c72046.graph_c0	0	0	0	0	0	0	0	0	4	0.88	0	0
c67684.graph_c0	0	0	0	0	0	0	0	0	4	1.31	0	0
c48402.graph_c0	2	0.38	6	1.23	10	1.51	0	0	0	0	6	1.17
c53849.graph_c1	33	8.83	18	5.16	22	4.67	52	12.92	39	9.12	60	16.24
c41303.graph_c0	0	0	2	0.67	0	0	1	0.29	2	0.54	1	0.31
c51386.graph_c0	3	1.08	0	0	1	0.28	0	0	0	0	0	0
c59880.graph_c1	713	35.4	799	41.08	1222	52.32	375	18.91	440	20.62	328	19.17
c50566.graph_c0	10	0.4	3	0.13	8	0.26	1	0.04	6	0.21	3	0.13
c40419.graph_c0	0	0	0	0	0	0	6	0.78	9	1.09	5	0.72
c73276.graph_c0	1	0.37	0	0	2	0.58	0	0	0	0	0	0
c65863.graph_c0	1	0.12	11	1.41	0	0	0	0	0	0	0	0
c46260.graph_c2	11	2.84	3	0.83	5	1.03	19	4.56	21	4.94	12	3.14
c52869.graph_c1	42750	2189.14	50988	2928.55	56717	2344.22	27675	1367.15	39264	1813.18	24999	1410.83
c30394.graph_c0	0	0	0	0	5	0.63	0	0	0	0	1	0.16
c57249.graph_c1	9520	390.67	9323	432.22	12587	419.27	2733	89.26	4848	150.85	2530	98.59
c89066.graph_c0	0	0	1	0.45	0	0	0	0	0	0	0	0
c44442.graph_c0	0	0	0	0	0	0	3	0.19	89	3.9	0	0
c67473.graph_c0	1	0.24	2	0.51	4	0.75	0	0	0	0	0	0
c62587.graph_c0	4	0.88	1	0.24	0	0	1	0.21	2	0.39	0	0
c53878.graph_c0	936	47.31	470	26.76	1389	56.64	367	17.83	497	22.36	312	17.34
c34249.graph_c0	8	0.8	5	0.56	11	0.88	8	0.76	4	0.35	3	0.32
c46097.graph_c0	388	8.05	374	8.75	500	8.48	532	10.6	534	9.8	353	8.17
c61226.graph_c1	168	14.52	246	24.26	235	15.05	101	6.57	183	13.57	83	5.47
c35125.graph_c0	0	0	0	0	8	0.98	0	0	0	0	2	0.32
c4480.graph_c0	0	0	0	0	0	0	0	0	5	0.64	0	0
c65800.graph_c0	0	0	0	0	0	0	0	0	10	1.35	0	0
c54586.graph_c0	28	2.47	26	2.67	27	1.86	11	0.84	3	0.2	12	1.08
c64660.graph_c0	1	0.29	0	0	5	1.15	0	0	0	0	0	0
c50598.graph_c0	18	1.33	36	2.98	18	1.07	1	0.07	0	0	2	0.16
c62576.graph_c0	1	0.3	5	1.58	6	1.41	2	0.55	0	0	0	0
c32906.graph_c0	0	0	0	0	0	0	0	0	9	2.13	0	0
c59155.graph_c2	1151	18.81	1557	24.96	1897	21.98	1085	12.33	1536	18.45	950	12.31
c15875.graph_c1	0	0	0	0	0	0	0	0	2	0.61	0	0
c50819.graph_c0	29	1.21	45	2.13	45	1.69	7	0.28	18	1.1	6	0.38
c41763.graph_c0	0	0	1	0.3	3	0.67	2	0.52	5	1.22	1	0.28
c51104.graph_c0	0	0	3	0.96	1	0.24	7	1.53	1	0.24	0	0
c44878.graph_c0	0	0	0	0	3	0.82	2	0.64	0	0	1	0.34
c53219.graph_c0	9	1.45	21	3.62	23	2.52	7	0.37	19	1.08	14	0.85
c78940.graph_c0	0	0	1	0.4	1	0.3	0	0	1	0.33	0	0
c65599.graph_c0	0	0	1	0.34	0	0	1	0.3	2	0.56	0	0
c66938.graph_c0	1	0.21	2	0.46	4	0.68	0	0	0	0	1	0.27
c33549.graph_c0	0	0	0	0	0	0	2	0.25	3	0.35	0	0
c22700.graph_c0	1	0.43	0	0	0	0	0	0	0	0	0	0
c60563.graph_c1	1146	12.65	1278	20.07	1615	17.08	1084	10.9	1187	11.77	852	10.61
c47926.graph_c0	0	0	1	0.49	0	0	0	0	0	0	0	0
c75023.graph_c0	0	0	0	0	0	0	2	0.45	0	0	2	0.49
c54414.graph_c0	14	0.55	10	0.49	28	1.1	27	1.35	34	1.5	28	1.27
c52939.graph_c0	311	12.72	562	25.48	475	15.39	160	6.11	300	10.81	141	6.21
c47665.graph_c0	14	1.38	0	0	14	1.23	1	0.12	0	0	10	1.31
c45252.graph_c0	0	0	5	1.64	2	0.49	1	0.28	0	0	0	0
c40567.graph_c0	0	0	0	0	1	0.18	0	0	0	0	0	0
c56769.graph_c2	4	0.78	4	0.85	9	1.41	11	2.02	7	1.2	8	1.62
c67854.graph_c0	1	0.25	0	0	1	0.2	0	0	0	0	0	0
c51002.graph_c0	1	0.13	7	0.98	5	0.53	0	0	3	0.38	1	0.15
c42818.graph_c0	28	4.13	55	8.93	45	5.32	29	4.04	54	7.04	27	4.2
c44011.graph_c1	0	0	0	0	8	1.59	0	0	0	0	6	1.02
c64276.graph_c0	0	0	0	0	0	0	0	0	10	2.37	0	0
c58888.graph_c0	32	4.18	24	2.97	46	4.38	6	0.51	15	1.42	5	0.63
c57367.graph_c2	157	4.67	298	10.1	330	7.97	121	3.49	289	7.72	152	5.08
c32295.graph_c0	0	0	0	0	1	0.39	0	0	0	0	0	0
c15991.graph_c0	0	0	0	0	0	0	0	0	2	0.45	0	0
c30563.graph_c0	0	0	3	1.08	2	0.54	0	0	0	0	0	0
c73339.graph_c0	0	0	0	0	0	0	0	0	3	1.1	0	0
c30204.graph_c0	10	3.13	3	1	4	0.99	1	0.29	5	1.36	1	0.31
c69506.graph_c0	0	0	2	1.05	3	1.18	0	0	0	0	0	0
c48245.graph_c1	3	1.2	0	0	0	0	0	0	1	0.35	0	0
c55140.graph_c0	3898	179.08	2607	134.85	5490	203.2	3834	169.13	3908	159.37	3550	178.89
c55416.graph_c0	86	9.93	79	10.11	77	7.14	119	13.06	224	22.89	313	38.58
c29300.graph_c0	2	0.51	0	0	3	0.6	2	0.47	1	0.22	5	1.29
c72954.graph_c0	0	0	0	0	0	0	0	0	0	0	0	0
c64877.graph_c0	4	0.89	0	0	2	0.36	0	0	2	0.39	1	0.23
c34639.graph_c0	3	0.61	2	0.44	4	0.65	0	0	0	0	0	0
c60591.graph_c1	2458	35.83	1602	27.66	3423	40.96	1672	25.13	2082	30.5	1767	30.81
c33149.graph_c0	0	0	0	0	0	0	0	0	13	2.47	0	0
c40596.graph_c0	0	0	0	0	0	0	0	0	4	0.7	0	0
c58471.graph_c0	399	15.25	259	11.19	370	11.43	229	8.43	213	7.24	241	10.14
c58121.graph_c0	217	9.07	79	4.02	465	14.98	40	1.51	76	2.88	102	4.21
c54545.graph_c1	12693	700.29	13285	821.33	14995	667.99	9242	489.88	12289	603.11	8374	507
c89153.graph_c0	0	0	0	0	0	0	1	0.39	0	0	0	0
c41784.graph_c0	93	14.54	72	12.36	117	14.65	48	7.08	49	6.76	98	16.1
c54881.graph_c0	0	0	0	0	0	0	20	2.72	24	3.05	6	0.91
c55258.graph_c0	9	0.7	40	2.92	45	2.7	0	0	19	1.15	2	0.11
c58722.graph_c0	374	5.25	565	9.45	622	7.11	306	4.47	417	5.54	307	5.31
c58970.graph_c0	160	11.15	175	13.68	179	10.05	59	3.94	88	5.49	86	6.55
c46002.graph_c0	0	0	0	0	0	0	3	0.39	2	0.24	5	0.73
c72478.graph_c0	1	0.2	3	0.66	2	0.33	0	0	0	0	0	0
c59157.graph_c2	102865	1104.76	120109	1481.17	168964	1473.55	41084	423.95	77230	740.62	45466	544.27
c65417.graph_c0	0	0	0	0	0	0	5	1.39	0	0	0	0
c39377.graph_c0	3	0.5	1	0.18	0	0	0	0	0	0	0	0
c34573.graph_c0	1	0.22	2	0.47	0	0	0	0	4	0.76	0	0
c52440.graph_c0	5	0.19	24	1.03	16	0.49	7	0.25	3	0.1	6	0.25
c54198.graph_c0	985	22.46	1116	28.78	1101	20.19	648	14.27	804	16.2	533	13.43
c29746.graph_c0	7	1.38	1	0.22	4	0.66	6	0.79	5	0.62	58	9.07
c57940.graph_c1	1161	88.35	1422	121.14	1583	97.04	358	26.07	620	41.87	388	32.02
c35210.graph_c0	2	0.11	0	0	4	0.18	12	0.65	12	0.6	47	2.89
c31377.graph_c0	0	0	0	0	0	0	3	1.12	0	0	0	0
c55997.graph_c0	1457	26.79	1447	30.62	2514	37.6	714	12.63	928	15.36	775	15.62
c38401.graph_c0	0	0	0	0	3	1.03	0	0	0	0	0	0
c48358.graph_c0	0	0	0	0	5	0.23	8	0.45	5	0.26	3	0.25
c89618.graph_c0	0	0	0	0	0	0	0	0	0	0	1	0.34
c57403.graph_c0	17	1.08	33	2.62	36	2.07	14	1.13	17	0.98	12	0.82
c42381.graph_c0	36	2.44	34	2.45	42	2.09	6	0.45	4	0.21	6	0.51
c53987.graph_c1	104	9.99	115	13.01	138	10.94	118	11.89	107	9.69	119	13.14
c8177.graph_c0	0	0	1	0.21	2	0.31	2	0.36	0	0	0	0
c79200.graph_c0	0	0	0	0	0	0	0	0	4	1.02	0	0
c36514.graph_c0	5	0.49	2	0.22	3	0.24	2	0.19	13	1.14	3	0.32
c35177.graph_c0	3	0.47	1	0.17	0	0	3	0.44	3	0.41	2	0.33
c31974.graph_c0	0	0	0	0	0	0	0	0	3	0.91	3	1.04
c47142.graph_c0	0	0	0	0	2	0.74	0	0	0	0	0	0
c41526.graph_c0	0	0	0	0	0	0	0	0	12	2.39	0	0
c55416.graph_c7	5	0.75	23	3.79	3	0.36	3	0.42	1	0.13	0	0
c56608.graph_c1	156	5.39	295	11.48	228	6.34	32	1.08	175	5.36	124	4.73
c63254.graph_c0	0	0	0	0	0	0	0	0	23	1.9	0	0
c36762.graph_c0	0	0	0	0	0	0	0	0	5	1.1	0	0
c66348.graph_c0	0	0	0	0	0	0	0	0	8	1.97	0	0
c55059.graph_c0	270	19.74	277	22.7	403	23.7	81	5.64	123	7.94	88	7.03
c14881.graph_c0	0	0	0	0	0	0	0	0	1	0.4	0	0
c47101.graph_c0	3	1.04	7	2.57	3	0.82	11	3.51	6	1.8	7	2.41
c81953.graph_c0	0	0	0	0	0	0	0	0	0	0	3	1.33
c47610.graph_c1	5	1.8	2	0.76	9	2.55	0	0	2	0.53	0	0
c9742.graph_c0	2	0.71	0	0	0	0	0	0	0	0	0	0
c52017.graph_c0	94	6.74	175	13.93	85	4.86	44	2.99	34	2.14	18	1.39
c57910.graph_c0	7	0.18	83	2.74	17	0.36	2	0.19	45	1.04	8	0.23
c60087.graph_c2	7	0.61	14	1.36	5	0.35	5	0.42	5	0.39	4	0.38
c54969.graph_c0	0	0	0	0	3	0.82	1	0.32	0	0	0	0
c46802.graph_c0	0	0	5	0.9	1	0.13	2	0.31	3	0.43	0	0
c41614.graph_c0	373	47.14	353	49.34	390	39.56	203	24.33	232	25.94	201	27
c67585.graph_c0	0	0	0	0	0	0	0	0	6	1.71	0	0
c68599.graph_c0	0	0	0	0	0	0	0	0	3	0.75	0	0
c52410.graph_c2	5	0.83	1	0.18	3	0.4	0	0	1	0.15	0	0
c36979.graph_c0	0	0	1	0.3	2	0.44	0	0	0	0	1	0.28
c79993.graph_c0	0	0	0	0	0	0	0	0	1	0.34	2	0.77
c29773.graph_c1	2	0.49	0	0	18	3.51	0	0	1	0.21	0	0
c55937.graph_c0	196	3.72	317	6.82	369	5.67	98	1.81	198	3.34	70	1.47
c35056.graph_c0	0	0	1	0.19	0	0	2	0.33	2	0.31	0	0
c53930.graph_c0	127	4.5	107	4.29	154	4.4	92	3.14	46	1.45	59	2.31
c29130.graph_c0	0	0	0	0	0	0	0	0	20	2.01	0	0
c41106.graph_c0	0	0	0	0	0	0	1	0.1	8	0.73	0	0
c36586.graph_c0	0	0	0	0	0	0	2	0.24	1	0.11	0	0
c58432.graph_c0	4	0.45	17	2.11	18	1.71	34	3.62	25	2.48	23	2.75
c59814.graph_c0	3492	63.29	2826	58.19	4203	61.57	4580	80.1	4747	76.52	3919	78.78
c61493.graph_c0	249	6.01	144	3.53	364	5.85	166	3.64	212	3.76	160	5.17
c75876.graph_c0	0	0	4	1.3	1	0.24	0	0	0	0	0	0
c65946.graph_c0	0	0	1	0.18	2	0.26	0	0	2	0.29	0	0
c5050.graph_c0	0	0	0	0	0	0	2	0.65	2	0.61	0	0
c55827.graph_c1	205	2.5	345	4.8	340	3.36	222	2.62	271	2.95	152	2.07
c72572.graph_c0	0	0	0	0	1	0.36	0	0	0	0	2	0.91
c41696.graph_c0	0	0	0	0	0	0	0	0	13	2.81	0	0
c2458.graph_c0	0	0	0	0	0	0	0	0	0	0	0	0
c58060.graph_c2	1	0.35	4	1.47	2	0.55	4	1.28	0	0	0	0
c79282.graph_c0	0	0	3	1.4	0	0	0	0	0	0	0	0
c57100.graph_c0	42	2.21	19	1.07	17	0.69	29	1.88	44	2.69	26	1.92
c56575.graph_c1	42	1.7	96	5.62	70	2.16	34	1.36	71	3.73	28	2.65
c56653.graph_c1	23	0.68	21	0.69	29	0.69	11	0.31	25	0.65	3	0.1
c31991.graph_c0	4	0.93	1	0.25	1	0.19	0	0	0	0	0	0
c69742.graph_c0	1	0.29	1	0.31	2	0.46	0	0	0	0	0	0
c72203.graph_c0	0	0	0	0	0	0	0	0	2	0.64	1	0.37
c39951.graph_c1	0	0	2	0.7	0	0	0	0	2	0.57	0	0
c30095.graph_c0	0	0	2	0.75	5	1.39	1	0.32	2	0.61	4	1.4
c50412.graph_c0	13	0.85	5	0.37	7	0.37	5	0.31	2	0.12	1	0.07
c38651.graph_c0	14	0.28	30	0.67	31	0.49	2	0.04	13	0.23	0	0
c63757.graph_c0	0	0	0	0	0	0	0	0	11	2.36	0	0
c52384.graph_c0	25	2.82	23	2.88	39	3.54	59	6.52	50	5.05	34	4.15
c59580.graph_c0	217	8.47	336	17.37	405	14.38	83	4.5	173	8.71	101	6.12
c44619.graph_c0	0	0	0	0	0	0	0	0	0	0	0	0
c46091.graph_c1	0	0	5	0.45	17	1.1	4	0.31	4	0.29	1	0.09
c67275.graph_c0	0	0	4	1.63	1	0.3	0	0	0	0	0	0
c46286.graph_c0	11	1.43	4	0.57	2	0.21	1	0.12	3	0.34	1	0.14
c58443.graph_c2	65	8.98	43	6.44	62	7	69	9.01	78	9.8	55	7.9
c57546.graph_c1	8596	179.93	10379	233.22	11968	195.17	9568	186.36	11640	200.62	8183	180.29
c45338.graph_c0	0	0	2	0.45	1	0.13	3	0.59	2	0.28	0	0
c17210.graph_c0	2	0.83	0	0	2	0.65	0	0	0	0	0	0
c43699.graph_c0	0	0	0	0	2	0.48	0	0	1	0.27	0	0
c45412.graph_c0	0	0	0	0	0	0	6	2.04	6	1.92	2	0.73
c45596.graph_c0	3	0.18	10	0.65	3	0.14	4	0.23	10	0.53	10	0.63
c58139.graph_c3	1081	71.74	740	52.83	1182	60.99	3612	236.61	3804	228.95	3141	233.35
c58861.graph_c0	43	2.04	66	3.54	72	2.76	32	1.46	51	2.15	42	2.19
c36408.graph_c0	2	0.39	0	0	0	0	0	0	0	0	0	0
c34338.graph_c1	0	0	1	0.25	2	0.37	0	0	2	0.41	0	0
c34282.graph_c1	3	0.5	5	0.91	4	0.53	3	0.47	1	0.15	2	0.35
c29838.graph_c0	452	7.41	685	12.76	631	8.37	325	5.16	443	6.48	290	5.28
c36756.graph_c0	0	0	1	0.23	0	0	3	0.6	5	0.93	6	1.31
c50305.graph_c1	2	0.39	2	0.42	6	0.93	0	0	1	0.17	0	0
c60008.graph_c1	1132	27.28	739	20.23	1224	23.54	2115	47.37	2585	55.24	1696	43.09
c48003.graph_c0	17	1.18	27	2.16	21	1.18	16	1.06	10	0.62	8	0.6
c50536.graph_c0	2293	46.82	2235	52.33	3283	54.12	2163	39.9	2483	42.74	1826	38.49
c31031.graph_c0	0	0	1	0.09	0	0	6	0.48	11	0.82	7	0.63
c75797.graph_c0	0	0	0	0	0	0	0	0	5	0.83	0	0
c29292.graph_c0	1	0.35	1	0.37	0	0	12	3.9	4	1.22	7	2.45
c60426.graph_c1	58	4.96	58	5.31	75	4.79	43	4.85	43	4.31	25	3.21
c61396.graph_c0	244	1.85	294	2.61	464	2.72	210	1.49	313	2.12	200	2.33
c53133.graph_c0	31	4.35	32	5.09	37	4.03	26	3.24	32	3.22	24	3.32
c46721.graph_c0	4	0.92	1	0.25	7	1.27	1	0.22	0	0	0	0
c72881.graph_c0	0	0	0	0	0	0	0	0	4	1.18	0	0
c49641.graph_c0	7	1.18	3	0.46	1	0.21	2	0.32	3	0.71	0	0
c61879.graph_c0	3	0.51	6	1.12	9	1.23	0	0	1	0.15	0	0
c42367.graph_c0	1	0.33	3	1.04	2	0.52	5	1.51	2	0.57	0	0
c49730.graph_c0	0	0	0	0	0	0	0	0	0	0	4	1.83
c32343.graph_c1	4	0.4	7	0.78	4	0.32	0	0	5	0.45	1	0.11
c58808.graph_c1	1447	91.05	1717	132.65	1974	104.52	1538	94.46	1798	103.84	1173	87.09
c52112.graph_c0	159	5.81	187	7.73	183	5.4	116	4.09	96	3.12	68	2.74
c40352.graph_c0	0	0	0	0	0	0	4	1.53	0	0	2	0.82
c52490.graph_c0	210	12.35	207	13.68	281	13.31	253	14.27	235	12.27	222	14.25
c83589.graph_c0	0	0	0	0	0	0	0	0	0	0	2	0.84
c80628.graph_c0	0	0	0	0	3	0.88	0	0	0	0	0	0
c3326.graph_c0	0	0	0	0	2	0.54	0	0	0	0	0	0
c52280.graph_c0	146	8.07	114	7.09	290	12.92	111	5.89	143	7.02	105	6.35
c41020.graph_c1	2	0.63	0	0	0	0	0	0	0	0	0	0
c72905.graph_c0	3	0.98	1	0.35	0	0	0	0	0	0	2	0.65
c66906.graph_c0	0	0	0	0	5	1.08	0	0	0	0	0	0
c60011.graph_c0	229	5.19	253	6.38	504	7.34	398	7.12	472	7.63	224	4.85
c73486.graph_c0	0	0	0	0	0	0	0	0	7	1.55	0	0
c10974.graph_c0	0	0	0	0	0	0	0	0	3	0.78	0	0
c62276.graph_c0	0	0	0	0	0	0	1	0.07	33	2.24	0	0
c59700.graph_c0	1105	15.19	1176	18.99	1327	14.81	1236	16.03	1133	14.17	1068	16.46
c58829.graph_c0	446	12.25	432	12.81	487	10.86	216	6.2	241	5.53	159	5.11
c54954.graph_c0	172	5.85	302	11.62	229	6.29	186	6.1	222	6.72	135	5.07
c89207.graph_c0	0	0	0	0	0	0	0	0	3	1.09	0	0
c44999.graph_c0	2	0.39	1	0.21	2	0.31	0	0	0	0	3	0.61
c38635.graph_c0	0	0	2	0.98	0	0	0	0	0	0	0	0
c59579.graph_c0	2368	34.9	2230	37.32	3033	36.26	1464	21.06	1418	18.81	1259	20.91
c39532.graph_c0	7	0.88	4	0.56	8	0.81	2	0.25	4	0.45	5	0.69
c57826.graph_c1	613	31.84	606	33.93	802	31.12	679	31.44	706	31.32	533	29.56
c30672.graph_c0	0	0	0	0	0	0	0	0	24	1.62	0	0
c52365.graph_c1	1231	60.89	1379	78.14	1613	64.65	841	41.36	945	46.52	711	41.99
c55822.graph_c0	42	1.22	27	0.89	85	1.99	22	0.62	46	1.19	50	1.6
c60354.graph_c0	10411	296.2	7949	245.66	12395	306.75	12885	258.22	14991	266.54	10671	258.6
c55123.graph_c0	980	37.54	1035	44.56	1450	44.77	396	14.59	671	22.99	421	17.74
c45344.graph_c0	4	0.39	7	0.76	11	0.86	5	0.46	3	0.26	4	0.42
c32051.graph_c0	0	0	0	0	9	1.01	0	0	1	0.12	0	0
c29108.graph_c0	4	1.38	0	0	2	0.54	0	0	0	0	3	1.03
c59848.graph_c0	9	0.46	12	0.7	23	0.95	0	0	2	0.09	0	0
c59343.graph_c1	240	5.74	407	11.05	432	8.34	207	4.78	247	5.26	138	3.66
c28994.graph_c0	2	0.54	0	0	5	1.08	0	0	2	0.47	0	0
c67119.graph_c0	0	0	0	0	0	0	0	0	7	1.92	0	0
c63910.graph_c0	0	0	0	0	0	0	4	0.54	3	0.38	7	1.05
c47456.graph_c0	2	0.2	4	0.44	3	0.24	5	0.47	10	0.87	8	0.84
c34927.graph_c0	0	0	3	0.64	0	0	0	0	2	0.34	0	0
c61007.graph_c1	1289	20.19	1537	27.36	1479	18.72	2004	30.22	2008	27.89	1460	25.36
c30328.graph_c0	0	0	0	0	1	0.19	0	0	0	0	0	0
c65239.graph_c0	0	0	1	0.3	2	0.44	0	0	0	0	0	0
c51873.graph_c0	0	0	0	0	0	0	0	0	5	1.59	0	0
c40985.graph_c0	0	0	0	0	0	0	0	0	2	0.44	1	0.26
c60855.graph_c0	165	2.75	335	6.25	401	5.04	20	0.39	124	1.89	23	0.25
c61252.graph_c0	1448	139.16	1297	121.06	1861	135.31	509	36.88	944	65.47	689	68.8
c69558.graph_c0	0	0	1	0.32	2	0.48	0	0	2	0.53	0	0
c41602.graph_c0	7	1.27	1	0.2	1	0.14	0	0	2	0.32	0	0
c42758.graph_c0	121	3.42	140	4.48	172	3.92	35	0.95	61	1.53	16	0.5
c50988.graph_c1	11565	2070.16	11700	2276.87	13611	1944.43	8881	1495	11061	1743.39	7691	1433.55
c44922.graph_c0	1	0.23	10	2.44	7	1.26	3	0.63	0	0	3	0.7
c63081.graph_c0	0	0	0	0	2	0.4	4	0.94	3	0.67	5	1.29
c61808.graph_c0	0	0	0	0	0	0	1	0.11	57	5.77	0	0
c75747.graph_c0	0	0	0	0	0	0	0	0	3	1.14	0	0
c58580.graph_c0	460	7.97	920	18.11	911	12.76	372	6.23	645	9.95	376	7.24
c57605.graph_c1	40	2.44	29	1.99	51	2.51	79	4.62	57	3.09	57	3.79
c46731.graph_c0	17	2.2	24	3.44	18	1.87	9	1.11	15	1.72	4	0.55
c66941.graph_c0	0	0	0	0	0	0	0	0	6	2.63	0	0
c58342.graph_c1	0	0	0	0	0	0	0	0	13	3.46	2	0.61
c58092.graph_c0	608	3.81	823	5.87	866	4.61	425	2.91	687	3.84	307	2.15
c55445.graph_c0	1906	50.84	1749	53	1893	40.69	1861	48.97	1937	47.04	1459	44.03
c32112.graph_c0	0	0	0	0	3	1.01	1	0.39	1	0.37	0	0
c60369.graph_c0	517	32.05	814	48.96	760	36.93	319	19.32	536	25.2	229	18.54
c30966.graph_c0	3	0.63	5	1.14	13	2.18	2	0.39	10	1.85	6	1.3
c66610.graph_c0	5	1.05	3	0.68	0	0	0	0	0	0	0	0
c49352.graph_c0	29	3.92	16	2.73	35	4.31	3	0.38	2	0.24	3	0.43
c51970.graph_c0	8	0.86	8	0.96	13	1.13	18	1.89	4	0.39	18	2.13
c51596.graph_c0	2658	187.85	1503	119.05	3632	206.69	1961	132.72	2476	155.34	2207	169.5
c42740.graph_c0	0	0	0	0	0	0	0	0	0	0	2	0.87
c56267.graph_c0	432	9.55	587	14.7	517	9.24	403	8.61	483	9.52	263	6.46
c73619.graph_c0	0	0	0	0	0	0	0	0	4	1.74	0	0
c53685.graph_c2	481	39.97	223	20.75	340	22.65	330	25.5	277	20.06	219	19.11
c53276.graph_c0	25	1.12	116	5.98	24	0.86	49	2.07	62	2.42	34	1.64
c54054.graph_c1	4	0.2	5	0.28	3	0.12	9	0.44	16	0.72	11	0.61
c14358.graph_c0	0	0	0	0	0	0	0	0	7	1.6	0	0
c43235.graph_c1	0	0	0	0	0	0	0	0	2	0.62	0	0
c58528.graph_c1	161	5.23	109	4.02	270	7.14	35	1.1	35	1	35	1.25
c56401.graph_c1	5240	801.16	3789	602.97	5336	639.38	6040	896.65	5444	749.92	5026	832.68
c58830.graph_c0	158	5.79	202	8.38	202	5.52	67	1.74	124	3.61	66	2.43
c62570.graph_c0	0	0	0	0	0	0	0	0	40	2.84	2	0.17
c52521.graph_c0	3	0.13	49	2.46	6	0.22	8	0.34	4	0.16	1	0.05
c58593.graph_c1	2	0.38	0	0	1	0.15	7	1.26	1	0.17	0	0
c53075.graph_c0	16	2.21	23	3.08	21	2.16	3	0.28	6	0.76	2	0.4
c54829.graph_c2	30	5.03	19	3.95	27	3.26	908	157.03	851	145.65	971	194.02
c54922.graph_c0	14	0.99	15	1.18	24	1.36	13	0.93	36	2.24	28	2.14
c2610.graph_c1	0	0	0	0	0	0	0	0	4	1.75	0	0
c56097.graph_c0	2088	70.57	3234	123.09	2805	76.08	1600	55.28	1682	53.35	1367	53.97
c69735.graph_c0	3	1.08	0	0	0	0	0	0	0	0	0	0
c40303.graph_c1	0	0	0	0	0	0	0	0	2	0.65	0	0
c49090.graph_c0	5	0.87	44	8.59	7	1.02	1	0.18	0	0	0	0
c50800.graph_c0	46	7.02	24	3.94	51	6.11	6	0.85	1	0.13	3	0.47
c39396.graph_c0	0	0	3	0.8	2	0.39	0	0	1	0.22	0	0
c43653.graph_c1	0	0	3	0.72	0	0	0	0	0	0	1	0.23
c35507.graph_c0	0	0	0	0	2	0.48	0	0	0	0	0	0
c57170.graph_c0	35	2.12	21	1.43	44	2.15	25	1.46	14	0.75	7	0.46
c44937.graph_c1	0	0	0	0	3	0.78	0	0	0	0	0	0
c55236.graph_c0	617	49.41	885	78.68	937	59.76	2958	226.35	3770	267.77	2845	246.21
c44373.graph_c0	0	0	2	0.71	3	0.79	0	0	0	0	0	0
c61158.graph_c0	115	2.97	168	3.12	167	3.24	149	2.74	109	1.64	43	1.3
c53985.graph_c1	23	1.38	61	4.13	47	2.28	16	0.92	31	1.66	23	1.51
c61181.graph_c1	3538	31.25	3291	33.93	5276	37.69	2785	24.15	3462	27.26	2390	23.54
c50828.graph_c0	224	10	226	11.38	261	9.39	196	8.4	211	8.35	146	7.14
c47701.graph_c0	2	0.07	18	0.79	16	0.5	3	0.1	7	0.26	0	0
c42466.graph_c0	0	0	0	0	0	0	0	0	3	0.42	1	0.17
c63573.graph_c0	0	0	0	0	0	0	6	0.75	4	0.47	2	0.28
c51042.graph_c1	3	0.67	17	4.08	6	1.06	1	0.21	4	0.78	0	0
c32258.graph_c0	0	0	0	0	0	0	3	1.29	0	0	0	0
c38753.graph_c0	0	0	4	0.59	1	0.11	7	0.88	3	0.35	0	0
c50863.graph_c0	6	0.89	7	1.14	13	1.55	7	0.98	12	1.58	11	1.72
c53714.graph_c1	21	1.14	21	1.28	42	1.84	0	0	0	0	0	0
c57887.graph_c0	1156	25.86	1432	36.37	1400	25.3	1285	27.76	1390	27.69	1085	26.91
c22024.graph_c0	2	0.8	0	0	2	0.63	0	0	0	0	0	0
c43373.graph_c0	0	0	0	0	3	1.01	0	0	0	0	0	0
c50623.graph_c0	50	5.92	41	5.37	81	7.7	71	7.98	62	6.49	77	9.71
c60825.graph_c1	78	4.11	45	2.73	78	3.34	76	3.85	74	3.46	51	2.94
c54976.graph_c0	18170	735.46	19875	909.7	23999	784.14	5875	229.37	8659	311.95	5046	224.99
c2107.graph_c1	0	0	0	0	0	0	5	0.82	3	0.46	1	0.18
c20269.graph_c0	0	0	0	0	2	0.48	0	0	0	0	0	0
c39236.graph_c0	0	0	0	0	0	0	0	0	1	0.29	2	0.66
c63739.graph_c0	4	1.13	0	0	0	0	0	0	2	0.49	1	0.28
c62906.graph_c0	2	0.39	6	1.27	4	0.62	0	0	3	0.51	1	0.2
c3077.graph_c0	3	1.4	0	0	0	0	0	0	0	0	0	0
c53809.graph_c0	13	0.47	47	1.62	9	0.2	3	0.08	27	0.65	1	0.03
c60304.graph_c1	159	10.11	197	14.83	196	9.87	111	5.11	108	5.58	97	5.75
c43232.graph_c0	0	0	2	0.32	5	0.59	0	0	0	0	0	0
c43923.graph_c0	5	0.49	1	0.11	12	0.95	1	0.09	1	0.09	11	1.16
c51408.graph_c0	50	3.1	38	2.29	54	3.05	39	3.47	44	2.36	39	1.91
c51878.graph_c0	16	1.01	38	2.7	17	0.87	7	0.42	23	1.29	2	0.14
c55902.graph_c0	5	0.16	9	0.32	21	0.53	1	0.03	24	0.67	10	0.35
c42332.graph_c0	37	1.53	38	1.78	43	1.44	30	1.2	24	0.88	24	1.09
c7846.graph_c0	2	0.89	0	0	0	0	0	0	0	0	0	0
c47381.graph_c1	4	0.19	16	0.87	8	0.31	1	0.05	6	0.26	1	0.05
c42920.graph_c0	0	0	0	0	0	0	0	0	23	1.22	1	0.07
c41925.graph_c0	5	0.29	4	0.26	12	0.57	5	0.28	1	0.05	0	0
c11355.graph_c0	0	0	0	0	0	0	0	0	5	0.78	0	0
c15425.graph_c0	2	0.25	1	0.14	4	0.41	1	0.12	2	0.22	0	0
c50248.graph_c0	148	8.23	36	2.2	237	10.71	64	3.44	48	2.5	157	10.7
c46164.graph_c0	3	0.55	9	1.81	8	1.18	4	0.69	1	0.16	2	0.38
c23608.graph_c0	0	0	1	0.32	1	0.24	0	0	0	0	0	0
c44054.graph_c2	0	0	2	0.84	0	0	0	0	0	0	0	0
c50393.graph_c0	3	0.7	2	0.5	4	0.74	1	0.22	0	0	4	0.9
c35202.graph_c0	6	1.82	6	1.94	8	1.92	8	2.24	14	3.69	5	1.52
c58922.graph_c1	323	12.62	347	15.33	399	12.61	176	6.65	320	11.15	185	7.96
c69500.graph_c0	0	0	0	0	0	0	0	0	4	1.61	0	0
c65047.graph_c0	1	0.26	2	0.55	2	0.41	0	0	0	0	0	0
c31485.graph_c0	0	0	0	0	2	0.5	0	0	0	0	0	0
c24608.graph_c0	1	0.09	7	0.68	4	0.28	2	0.17	0	0	0	0
c61496.graph_c0	56	0.67	272	4.28	117	1.14	44	0.68	213	2.29	39	0.53
c13911.graph_c0	0	0	0	0	0	0	0	0	5	1.35	0	0
c30587.graph_c0	0	0	0	0	2	0.56	3	0.97	1	0.31	0	0
c29796.graph_c0	0	0	0	0	0	0	0	0	55	6.36	0	0
c44109.graph_c0	4	0.46	9	1.15	11	1.02	2	0.22	6	0.61	5	0.62
c41541.graph_c0	0	0	0	0	0	0	2	0.13	222	14.22	0	0
c48371.graph_c1	0	0	0	0	0	0	4	0.17	304	20.71	1	0.05
c56781.graph_c0	966	32.16	671	25.28	933	25.08	1158	37.18	1313	38.92	837	30.77
c58070.graph_c1	46	1.9	29	1.35	52	1.73	3	0.12	7	0.26	3	0.14
c42100.graph_c0	1	0.15	2	0.32	0	0	0	0	3	0.39	0	0
c66048.graph_c0	0	0	8	2.02	0	0	0	0	0	0	0	0
c32658.graph_c0	1	0.14	3	0.46	8	0.89	4	0.52	1	0.12	0	0
c34201.graph_c0	0	0	0	0	0	0	2	0.12	69	3.26	1	0.07
c32453.graph_c0	0	0	3	0.71	1	0.17	1	0.2	0	0	0	0
c53617.graph_c0	3	0.8	1	0.47	0	0	0	0	2	0.78	0	0
c51205.graph_c1	4	1.04	3	0.84	9	1.85	0	0	0	0	0	0
c60451.graph_c0	196	23.52	265	36.59	256	24.28	167	25.68	319	35.2	96	22.45
c80180.graph_c0	4	1.35	0	0	1	0.27	0	0	0	0	0	0
c65234.graph_c0	3	0.36	0	0	0	0	2	0.23	0	0	10	1.29
c40508.graph_c0	2	0.27	6	0.9	3	0.33	0	0	2	0.24	0	0
c29924.graph_c0	5	0.69	14	2.13	14	1.55	7	0.92	18	2.2	0	0
c50620.graph_c1	21	2.37	19	2.38	8	0.73	192	20.62	117	11.7	169	20.4
c46177.graph_c0	28	1.78	78	5.54	76	3.84	31	1.89	66	3.72	54	3.47
c42292.graph_c0	2	0.44	1	0.24	3	0.53	0	0	0	0	0	0
c57367.graph_c0	0	0	9	3.02	6	1.5	6	1.75	0	0	3	0.95
c44983.graph_c0	3	0.49	0	0	3	0.39	0	0	0	0	2	0.34
c55531.graph_c0	3	0.37	2	0.27	2	0.2	8	0.93	16	1.72	9	1.17
c64103.graph_c0	2	0.47	5	1.26	2	0.37	2	0.44	1	0.2	0	0
c30320.graph_c0	10	0.71	2	0.16	6	0.34	0	0	3	0.19	0	0
c67873.graph_c0	0	0	5	0.78	2	0.23	0	0	0	0	0	0
c58404.graph_c2	15	1.21	36	3.12	31	1.88	25	1.07	27	2.16	18	1.72
c41204.graph_c2	1	0.23	0	0	3	0.56	0	0	1	0.2	0	0
c55799.graph_c0	4216	404.37	3641	430.46	4996	383.79	7827	520.01	7377	459.87	7237	579.81
c53152.graph_c0	0	0	0	0	0	0	6	1.13	6	1.06	0	0
c59811.graph_c1	98	4.49	88	4.55	145	5.36	109	4.81	119	4.85	97	4.88
c77717.graph_c0	0	0	0	0	0	0	0	0	0	0	2	0.91
c47319.graph_c0	5	0.53	3	0.34	5	0.41	2	0.32	1	0.15	0	0
c55806.graph_c0	358	26.7	412	33.75	440	26.01	210	14.13	284	18.3	182	13.83
c52608.graph_c0	89	1.96	238	5.96	174	3.1	114	2.43	197	3.87	69	1.69
c29290.graph_c0	1	0.3	0	0	2	0.48	0	0	2	0.53	1	0.31
c64190.graph_c0	0	0	0	0	0	0	0	0	11	2.01	0	0
c61014.graph_c1	880	85.77	495	54.03	811	64.27	1227	114.24	1153	100.19	1117	118.25
c65027.graph_c0	2	0.81	3	1.28	1	0.32	0	0	0	0	0	0
c36318.graph_c0	2	0.68	0	0	0	0	0	0	0	0	0	0
c61447.graph_c0	1167	6.81	2495	16.57	2601	12.27	500	2.83	1148	5.97	380	2.48
c63933.graph_c0	0	0	3	0.35	2	0.17	0	0	0	0	0	0
c49599.graph_c0	14	0.76	11	0.68	9	0.4	10	0.52	22	1.07	10	0.6
c48913.graph_c1	0	0	0	0	0	0	0	0	19	1.13	0	0
c65642.graph_c0	0	0	0	0	1	0.21	0	0	0	0	7	1.9
c54752.graph_c3	0	0	0	0	0	0	0	0	13	2.75	0	0
c54752.graph_c13	0	0	0	0	0	0	1	0.14	220	29.2	0	0
c65711.graph_c0	0	0	0	0	0	0	0	0	12	1.76	0	0
c39708.graph_c0	0	0	0	0	0	0	0	0	34	3.01	0	0
c60618.graph_c0	624	6.51	768	9.04	1065	8.94	839	8.6	1154	10.96	804	9.32
c52717.graph_c1	954	52.55	766	46.91	1089	48.54	977	50.4	983	46.41	1013	59.47
c42776.graph_c0	2	0.43	0	0	6	1.03	0	0	0	0	0	0
c60578.graph_c0	114	3.98	166	6.54	197	5.54	45	1.54	54	1.67	34	1.3
c65558.graph_c0	1	0.22	4	0.96	1	0.18	0	0	1	0.19	0	0
c38669.graph_c0	0	0	0	0	0	0	0	0	6	1.76	0	0
c2641.graph_c0	0	0	0	0	0	0	0	0	2	0.88	0	0
c88968.graph_c0	0	0	0	0	0	0	1	0.44	0	0	0	0
c50179.graph_c0	44	5.56	53	7.41	76	7.71	32	3.84	25	2.8	14	1.88
c45534.graph_c0	39	1.75	31	1.57	30	1.08	6	0.26	13	0.52	14	0.69
c73023.graph_c0	0	0	0	0	2	0.59	0	0	1	0.32	0	0
c54610.graph_c0	924	17.37	1809	38.14	1635	24.64	644	11.55	1091	18.54	569	11.92
c46661.graph_c0	5	0.39	2	0.29	6	0.38	7	0.52	6	0.41	2	0.18
c65836.graph_c0	0	0	5	0.63	1	0.09	2	0.22	3	0.3	0	0
c64259.graph_c0	0	0	0	0	0	0	0	0	9	1.42	0	0
c43182.graph_c1	2	0.74	1	0.39	0	0	0	0	0	0	0	0
c60143.graph_c0	49	4.3	66	6.36	65	4.56	71	5.84	63	4.82	73	6.78
c48556.graph_c0	14957	1671.79	16709	2086.89	19582	1751.23	9739	1045.13	13205	1313.04	8089	971.29
c2370.graph_c0	1	0.28	2	0.6	3	0.67	1	0.26	0	0	0	0
c79143.graph_c0	0	0	0	0	0	0	0	0	2	0.61	0	0
c58239.graph_c0	11	4.71	0	0	6	1.95	525	200.86	296	106.36	272	111.01
c54563.graph_c0	18	2.23	23	3.16	29	2.96	29	3.41	26	2.96	14	1.93
c35390.graph_c1	0	0	0	0	0	0	0	0	12	2.77	0	0
c55313.graph_c0	106	4.64	150	7.41	156	5.51	143	6.02	159	6.19	86	4.14
c44378.graph_c1	0	0	0	0	2	0.58	4	1.36	0	0	0	0
c66675.graph_c0	0	0	0	0	0	0	0	0	7	1.2	0	0
c53575.graph_c0	148	10.1	206	15.76	217	11.92	128	8.37	145	8.78	92	6.83
c3823.graph_c1	3	0.7	1	0.25	1	0.19	0	0	0	0	0	0
c3050.graph_c0	2	0.49	1	0.31	0	0	0	0	0	0	0	0
c55420.graph_c0	453	13.42	533	17.87	711	16.97	594	17.03	655	17.34	466	15.31
c63548.graph_c0	0	0	0	0	0	0	0	0	12	3.91	1	0.37
c60911.graph_c1	3482	47.74	4790	73.97	5270	58.01	2679	36.79	4275	53.09	2872	44.93
c59061.graph_c1	345	18.39	270	17.5	487	21.88	448	23.22	437	19.98	399	23.85
c67794.graph_c0	0	0	0	0	0	0	2	0.49	2	0.46	1	0.27
c71058.graph_c0	0	0	0	0	0	0	0	0	0	0	2	0.88
c49001.graph_c0	7	1.57	1	0.24	3	0.69	0	0	0	0	11	2.72
c78403.graph_c0	0	0	0	0	0	0	0	0	3	0.56	0	0
c65358.graph_c0	4	0.6	4	0.66	3	0.36	0	0	0	0	0	0
c16345.graph_c0	0	0	1	0.54	0	0	0	0	0	0	1	0.5
c55326.graph_c1	5	0.37	22	1.8	7	0.41	0	0	3	0.19	0	0
c58027.graph_c0	92	2.96	99	3.14	169	4.03	82	2.72	116	4.05	70	2.74
c20351.graph_c0	0	0	0	0	0	0	0	0	9	1.79	0	0
c58688.graph_c0	8920	268.96	3427	117.45	6122	150.67	414	13.91	363	14.04	334	13.26
c44900.graph_c2	2	0.69	0	0	0	0	1	0.14	2	0.6	0	0
c29352.graph_c0	0	0	0	0	0	0	0	0	54	1.57	1	0.04
c65444.graph_c0	0	0	0	0	0	0	6	0.55	3	0.26	7	0.72
c56354.graph_c0	6	0.3	16	0.9	27	1.11	3	0.14	12	0.54	6	0.33
c54695.graph_c2	6	0.39	5	0.54	16	0.85	3	0.19	3	0.18	5	0.9
c55567.graph_c0	571	31.03	514	32.03	703	30.52	343	18.91	391	18.86	290	17.79
c56231.graph_c0	97	2.98	158	5.44	157	3.88	90	2.63	120	3.26	88	2.93
c58013.graph_c0	274	8.68	304	11.41	483	13.23	184	5.88	283	8.11	185	6.89
c42473.graph_c0	6	0.88	5	0.81	2	0.24	0	0	5	0.65	4	0.62
c54877.graph_c1	47	7.3	33	5.62	46	5.74	63	9.29	52	7.17	42	6.91
c16543.graph_c0	0	0	0	0	1	0.2	0	0	2	0.44	0	0
c66592.graph_c0	0	0	0	0	0	0	0	0	11	1.74	0	0
c78079.graph_c0	2	0.63	0	0	1	0.25	0	0	0	0	0	0
c50395.graph_c0	4	0.23	12	0.79	11	0.52	2	0.11	9	0.47	0	0
c32907.graph_c0	2	0.46	1	0.25	4	0.73	0	0	0	0	0	0
c28982.graph_c0	5	0.6	9	1.2	6	0.58	0	0	1	0.11	4	0.51
c55808.graph_c0	1848	56.36	2097	72.42	2100	51.73	1414	41.59	1614	43.81	1100	37.09
c57874.graph_c0	561	14.14	639	18.24	945	19.22	524	12.66	703	15.66	405	11.24
c18412.graph_c0	0	0	0	0	0	0	0	0	4	1.02	0	0
c65941.graph_c0	0	0	3	0.99	0	0	0	0	1	0.27	1	0.31
c56019.graph_c1	588	86.83	329	53.23	702	82.8	108	15.27	130	16.93	145	22.87
c60829.graph_c1	1461	43.27	1263	39.7	1464	34.07	1535	39.94	1459	34.43	1203	34.15
c31223.graph_c0	0	0	1	0.41	3	0.92	2	0.72	0	0	1	0.38
c50690.graph_c0	15	0.99	26	1.92	57	3.03	3	0.3	11	0.64	1	0.07
c58136.graph_c0	34	1.53	100	2.72	64	1.54	12	0.31	45	1.11	15	0.73
c48580.graph_c0	0	0	0	0	1	0.13	2	0.31	6	0.88	9	1.56
c44588.graph_c0	3	0.4	2	0.43	5	0.53	0	0	0	0	0	0
c59233.graph_c0	1220	34.73	669	21.55	1535	36	973	29.51	1083	30.23	978	32.71
c56437.graph_c0	813	29.74	1074	44.42	1176	34.73	582	20.51	909	29.58	502	20.24
c50096.graph_c0	2163	258.04	1509	199.42	2347	224.79	3580	405.63	3675	387.98	3008	382.62
c67847.graph_c0	0	0	0	0	0	0	0	0	8	1.56	0	0
c59193.graph_c0	27	5.6	18	4.05	31	5.13	4	0.78	15	2.74	3	0.64
c55951.graph_c0	95	2.38	77	2.11	119	2.77	14	0.33	19	0.4	15	0.39
c49122.graph_c1	0	0	0	0	3	0.38	3	0.44	0	0	1	0.16
c65192.graph_c0	0	0	0	0	0	0	0	0	9	1.31	0	0
c2040.graph_c1	0	0	0	0	0	0	7	0.39	8	0.41	8	0.51
c57628.graph_c0	1208	16.36	1818	27.49	2374	27.28	1663	21.68	2392	28.29	1379	20.81
c39091.graph_c0	2	0.31	2	0.34	8	0.99	0	0	4	0.54	3	0.49
c30614.graph_c0	0	0	0	0	0	0	0	0	10	2.18	0	0
c59925.graph_c1	2	0.65	0	0	0	0	0	0	0	0	0	0
c49247.graph_c1	9557	209.49	3883	96.57	3897	69.12	8562	181.84	7766	151.57	5104	124.41
c45382.graph_c0	0	0	0	0	0	0	0	0	6	1.11	0	0
c58407.graph_c0	1965	114.45	2805	184.14	3249	152.03	779	46.81	1374	76.12	698	51.23
c80838.graph_c0	0	0	0	0	0	0	0	0	5	1.1	0	0
c44003.graph_c1	0	0	0	0	0	0	0	0	0	0	0	0
c47631.graph_c0	2	0.76	7	2.8	8	2.39	7	1.11	11	1.79	12	2.32
[truncated: 40,848 more rows]
